# Supplementary material for: Metabolomics and metagenomics integration deciphers gut ecosystem changes following prophylactic interventions in commercial broilers
Source: Research Square preprint supplement (doi:10.21203/rs.3.rs-8212954/v1), 2026-01-19
Supplement: Supplementary file 1 [file 792969a1470d3c4221f31f75.xlsx]

## Sheet: Metabolitedataset
ID	ID_name	Metabolite.ID	Ion.Mode	RT	CalcMz	Formula	Name	Delta.Mass.Da	Delta.Mass.ppm	Match	Level	Database	KEGG.ID	HMDB.ID	Super.Class	Sub.Class	Class	Final.Class	Super.Pathway	Sub.Pathway	Pathway	MP1	MP10	MP11	MP12	MP13	MP14	MP15	MP16	MP17	MP18	MP19	MP2	MP20	MP3	MP4	MP5	MP6	MP7	MP8	MP9	Mean
C3370	C3370_((2R,3S)-3-Amino-2-hydroxy-2-(1H-imidazol-4-ylmethyl)-5-methyl)-5-methylhexanoic Acid	HMDB0242228	POS	0.705	242.15	C11 H19 N3 O3	((2R,3S)-3-Amino-2-hydroxy-2-(1H-imidazol-4-ylmethyl)-5-methyl)-5-methylhexanoic Acid	0.00014180192846424	0.588041698716701	NA	4	HMDB	NA	HMDB0242228	Organic acids and derivatives	Amino acids, peptides, and analogues	Carboxylic acids and derivatives	Amino acids, peptides, and analogues	NA	NA	NA	809203	627383	2.77468e+06	1.47811e+06	1.07999e+06	884414	995447	996155	738783	882102	1.6077e+06	574755	1.37272e+06	2.26769e+06	423837	807906	1.12987e+06	783193	1.34157e+06	1.77895e+06	1.16772e+06
A3118	A3118_(+)-(R)-2-(2,4-Difluorophenyl)-1-(3-((E)-4-(2,2,3,3-tetrafluoropropoxy)styryl)-1,2,4-triazol-1-yl)-3-(1,2,4-triazol-1-yl)propan-2-ol	HMDB0242238	POS	0.672	539.164	C24 H20 F6 N6 O2	(+)-(R)-2-(2,4-Difluorophenyl)-1-(3-((E)-4-(2,2,3,3-tetrafluoropropoxy)styryl)-1,2,4-triazol-1-yl)-3-(1,2,4-triazol-1-yl)propan-2-ol	0.00154489581439066	2.87072546076993	NA	4	HMDB	NA	HMDB0242238	Benzenoids	NA	Phenol ethers	Benzene and derivatives	NA	NA	NA	2.78037e+06	1.02609e+06	1.40538e+06	1.10477e+06	1.08808e+06	1.77474e+06	1.475e+06	1.09618e+06	1.17221e+06	1.10293e+06	5.3368e+06	721323	1.00128e+06	1.53831e+06	2.52789e+06	2.82815e+06	1.59096e+06	1.23134e+06	908469	1.81556e+06	1.67629e+06
C2802	C2802_(+)-7-Isojasmonic acid;	C16317	POS	5.271	193.123	C12 H18 O3	(+)-7-Isojasmonic acid;	0.00034461245240891	1.64003082771202	NA	4	KEGG	C16317	NA	FA Fatty acyls	FA0202 Jasmonic acids	FA02 Octadecanoids	Fatty acyls[FA]	Lipid metabolism	alpha-Linolenic acid metabolism	map00592 alpha-Linolenic acid metabolism; map01100 Metabolic pathways;	5.54638e+06	6.20637e+06	6.8237e+06	9.23771e+06	1.15467e+07	3.34044e+06	8.04211e+06	6.30077e+06	4.53572e+06	6.70515e+06	1.90469e+06	7.06483e+06	6.34537e+06	1.16854e+07	5.80922e+06	2.67745e+06	3.93818e+06	6.79704e+06	2.51256e+06	3.58812e+06	6.0304e+06
C3372	C3372_(+)-Arteannuin	HMDB0242246	POS	4.69	283.154	C15 H22 O5	(+)-Arteannuin	-5.60970625542723e-05	-0.198822307154882	NA	4	HMDB	NA	HMDB0242246	Lipids and lipid-like molecules	Terpene lactones	Prenol lipids	Terpenoids	NA	NA	NA	2.55905e+06	2.30357e+06	1.86605e+06	3.22623e+06	2.82834e+06	1.01992e+06	2.10642e+06	1.62375e+06	1.85747e+06	2.2105e+06	292350	1.5867e+06	1.85487e+06	1.68545e+06	2.50515e+06	494946	2.79771e+06	1.25851e+06	1.46169e+06	474772	1.80067e+06
C1991	C1991_(+)-CP 47,497	Reference4958	POS	8.012	301.253	C21 H34 O2	(+)-CP 47,497	-18.0105933709968	-56591.5494115826	27.9426002229379	3	mzCloud	NA	NA	NA	NA	NA	NA	NA	NA	NA	307569	51026	430699	144604	52035.3	281790	1.27474e+07	694609	188129	246217	436595	2.15796e+06	927825	290932	49514.8	4.02625e+06	491711	1.38706e+07	68123.8	141374	1.88025e+06
C3373	C3373_(+)-Diacetyl-L-tartaric anhydride	HMDB0242250	NEG	0.627	215.019	C8 H8 O7	(+)-Diacetyl-L-tartaric anhydride	-0.00024926988419338	-1.15388299322727	NA	4	HMDB	NA	HMDB0242250	Organic acids and derivatives	Tetracarboxylic acids and derivatives	Carboxylic acids and derivatives	Organic acids	NA	NA	NA	1.44779e+06	2.58305e+06	1.31805e+06	1.32034e+06	1.28789e+06	1.84124e+06	1.12154e+06	544020	3.47234e+06	3.27038e+06	2.8913e+06	889210	1.86177e+06	229875	2.14501e+06	2.42733e+06	1.38303e+06	1.57018e+06	5.61316e+06	300730	1.87591e+06
A3120	A3120_(+)-Epibatidine	HMDB0242251	NEG	0.973	207.07	C11 H13 Cl N2	(+)-Epibatidine	0.00035949996095041	1.7277278805075	NA	4	HMDB	NA	HMDB0242251	Alkaloids and derivatives	NA	Epibatidine analogues	Alkaloids and derivatives	NA	NA	NA	225709	191324	3.47145e+07	305317	1.30704e+06	2.52723e+06	124227	100868	54771.4	134677	162047	92289	42943.2	80572.8	87124.1	185637	105173	176464	320236	228859	2.05835e+06
C2465	C2465_(+)-Vulgraon B	9.528_217.19541	POS	9.528	217.195	C16 H24	(+)-Vulgraon B	0.00033570369285485	1.55283365544591	NA	4	NA	NA	NA	NA	NA	NA	NA	NA	NA	NA	1.05332e+07	1.20007e+07	1.84857e+07	9.00996e+06	3.58653e+06	2.19687e+06	1.10159e+07	9.30202e+06	8.14122e+06	6.95863e+06	2.14378e+06	4.58455e+06	1.54231e+07	6.63673e+06	1.36559e+07	2.01276e+06	1.08815e+07	6.68979e+06	5.24212e+06	1.61715e+06	8.0059e+06
C882	C882_(+)-ar-Turmerone	Reference6219	POS	5.522	217.159	C15 H20 O	(+)-ar-Turmerone	0.00027070446006405	1.25238347300931	66.4883426226432	2	mzCloud	NA	NA	NA	NA	NA	NA	NA	NA	NA	6.32179e+06	4.61531e+06	1.16449e+06	3.59895e+06	2.47456e+06	2.49308e+06	2.41772e+06	3.29719e+06	931791	2.37782e+06	661396	1.30038e+06	2.02208e+06	939622	6.80564e+06	640625	4.74175e+06	496077	2.33538e+06	553604	2.50946e+06
C3257	C3257_(+-)-Aegeline	HMDB0033435	POS	3.762	280.133	C18 H19 N O3	(+-)-Aegeline	-18.010891620839	-60614.8757312401	25.9861142339943	4	Public	NA	HMDB0033435	Phenylpropanoids and polyketides	Cinnamic acid amides	Cinnamic acids and derivatives	Polyketides[PK]	NA	NA	NA	38956.5	246031	35533.4	38538	149505	4.47213e+06	56879.6	33163.3	323884	33012.1	1.16252e+07	36459.9	36719.3	41506.3	39672.7	5.39358e+06	227841	34971.6	3.24765e+06	2.5385e+06	1.43249e+06
A3117	A3117_(+-)-Carbovir	HMDB0242235	NEG	11.298	246.098	C11 H13 N5 O2	(+-)-Carbovir	-0.00120959448562985	-4.89502464423775	NA	4	HMDB	NA	HMDB0242235	Nucleosides, nucleotides, and analogues	NA	Nucleoside and nucleotide analogues	Nucleic acids and analogues	NA	NA	NA	9.66036e+07	7.50702e+07	3.37669e+07	5.89921e+07	1.38638e+08	1.15756e+07	1.14613e+08	6.69068e+07	2.45856e+07	9.83494e+07	8.11305e+06	1.32271e+08	4.86018e+07	4.41683e+07	1.10857e+07	4.30905e+06	1.51054e+08	3.91924e+07	6.02045e+07	4.41565e+06	6.11258e+07
C3271	C3271_(+-)-Furaneol	HMDB0040594	NEG	0.956	127.04	C6 H8 O3	(+-)-Furaneol	-1.86127115853196e-06	-0.0145358044908025	NA	4	HMDB	NA	HMDB0040594	Organoheterocyclic compounds	Furanones	Dihydrofurans	Furanones	NA	NA	NA	832788	809082	892470	642647	1.05329e+06	2.62117e+06	1.16961e+06	1.32757e+06	1.04898e+06	1.37552e+06	9.02514e+06	1.18246e+06	1.35939e+06	565182	557688	7.12385e+06	885924	1.48269e+06	2.11594e+06	8.96733e+06	2.25194e+06
C208	C208_(+-)-Tryptophan	3.459_205.09732	POS	3.459	205.097	C11 H12 N2 O2	(+-)-Tryptophan	0.00016627354921183	0.814707476920088	94.3834440072791	2	Masslist	NA	NA	NA	NA	NA	NA	NA	NA	NA	2.2848e+06	1.14576e+06	2.53509e+06	2.02383e+06	442719	8.27106e+06	3.49006e+06	2.05418e+06	584646	2.41053e+06	1.21702e+07	5.11251e+06	2.36772e+06	4.92031e+06	651406	7.25613e+06	1.19005e+06	3.46105e+06	1.75625e+06	2.71783e+07	4.56534e+06
A103	A103_(+-)13-HODE	0.893_295.22795	NEG	0.893	295.228	C18 H32 O3	(+-)13-HODE	8.30782161074239e-05	0.280446859790155	83.5604120100654	2	mzCloud	NA	NA	NA	NA	NA	NA	NA	NA	NA	7.63871e+07	1.80864e+07	3.2791e+07	3.82355e+07	3.23068e+07	6.84767e+07	1.27158e+07	6.78287e+07	5.01127e+07	1.56944e+07	2.02958e+08	4.41781e+07	3.75187e+07	3.04994e+07	1.33274e+08	3.09131e+08	4.31144e+07	3.01681e+07	1.47027e+07	5.75534e+08	9.16856e+07
C1521	C1521_(+-)15-HETE	6.106_339.25293	POS	6.106	339.253	C20 H32 O3	(+-)15-HETE	18.0104980704214	56241.4786919136	45.1576809682715	3	mzCloud	NA	NA	NA	NA	NA	NA	NA	NA	NA	6.28504e+06	5.05558e+06	3.172e+06	5.28309e+06	2.65116e+06	1.3197e+06	4.10737e+06	2.85281e+06	2.98255e+06	2.70841e+06	218907	2.40762e+06	1.89974e+06	6.25163e+06	8.48057e+06	642356	4.47415e+06	1.66834e+06	3.39415e+06	335116	3.30951e+06
C1593	C1593_(+-)17(18)-EpETE methyl ester	8.527_350.26886	POS	8.527	350.269	C21 H32 O3	(+-)17(18)-EpETE methyl ester	17.0264307597491	51248.1326201917	37.902108966278	3	mzCloud	NA	NA	NA	NA	NA	NA	NA	NA	NA	1.38181e+07	3.07776e+06	229695	1.55899e+06	3.85521e+06	4.64904e+06	2.09848e+06	740096	6.62255e+06	6.94418e+06	549241	1.51271e+07	60451.8	210552	1.08309e+07	3.63715e+06	174699	3.42321e+06	1.559e+07	211358	4.67044e+06
A959	A959_(+-)5(6)-DiHETE	1.09_353.23380	NEG	1.09	353.234	C20 H32 O4	(+-)5(6)-DiHETE	18.0109318166645	53567.286193708	67.2670427999115	3	mzCloud	NA	NA	NA	NA	NA	NA	NA	NA	NA	499928	1.45608e+06	674785	4.46537e+06	2.50882e+06	2.97655e+06	749127	208428	237799	581125	267595	1.96021e+06	273228	676606	593793	660786	627338	391038	620098	401969	1.04153e+06
C1613	C1613_(+-)5-HETE	9.268_321.24054	POS	9.268	321.241	C20 H32 O3	(+-)5-HETE	-0.00159097582769618	-4.9681487298608	74.7629953380312	3	mzCloud	NA	NA	NA	NA	NA	NA	NA	NA	NA	2.71214e+06	1.43746e+06	5.98333e+06	3.1867e+06	2.78602e+06	2.27606e+07	2.84602e+06	9.17335e+06	2.94527e+06	2.3177e+06	2.92929e+06	1.45954e+06	4.91406e+06	3.66776e+06	4.75766e+06	6.3067e+06	4.83135e+06	3.62477e+06	1.38251e+06	2.32579e+06	4.6174e+06
C487	C487_(+-)9(10)-DiHOME	8.335_313.23800	NEG	8.335	313.238	C18 H34 O4	(+-)9(10)-DiHOME	-0.00043509872597269	-1.38458127805707	95.4579202536226	2	mzCloud	NA	NA	NA	NA	NA	NA	NA	NA	NA	1.3529e+06	831254	508243	956280	1.76793e+06	1.87405e+07	1.20746e+06	1.25259e+06	939216	481439	9.47839e+06	1.52228e+06	490562	3.77844e+06	2.5428e+06	7.23883e+06	1.01064e+06	868957	1.14655e+06	8.15232e+06	3.21338e+06
A257	A257_(+-)9-HpODE	2.628_311.22301	NEG	2.628	311.223	C18 H32 O4	(+-)9-HpODE	0.00022851803862522	0.731889937482748	80.8418533697008	2	mzCloud	NA	NA	NA	NA	NA	NA	NA	NA	NA	4.29629e+06	6.81776e+06	3.54465e+06	7.78033e+06	3.66902e+06	9.54537e+06	3.58614e+06	6.42392e+06	2.47781e+07	2.89205e+06	2.35496e+07	4.35523e+06	7.31134e+06	7.83835e+06	1.35145e+07	2.70941e+07	5.4626e+06	1.76522e+06	8.38655e+06	5.82381e+07	1.15425e+07
C3374	C3374_(+/-)-(E)-Methyl-2-[(E)-hydroxyimino]-5-nitro-6-methoxy-3-hexeneamide	HMDB0242268	POS	0.709	232.093	C8 H13 N3 O5	(+/-)-(E)-Methyl-2-[(E)-hydroxyimino]-5-nitro-6-methoxy-3-hexeneamide	0.00047849226075413	2.07062848397681	NA	4	HMDB	NA	HMDB0242268	Organic nitrogen compounds	Oximes	Organonitrogen compounds	Oximes	NA	NA	NA	857414	887127	1.05139e+06	1.13422e+06	794451	545342	751645	954332	976960	1.13867e+06	926686	613031	1.45668e+06	1.20652e+06	1.34314e+06	538545	1.53715e+06	501946	811773	1.11758e+06	957230
A741	A741_(+/-)-C75	Reference6613	POS	0.942	237.149	C14 H22 O4	(+/-)-C75	-18.0104451893497	-70864.9104484547	79.5913377007423	2	mzCloud	NA	NA	NA	NA	NA	NA	NA	NA	NA	1.40393e+07	1.10461e+07	9.19541e+06	1.21934e+07	1.44387e+07	4.12604e+06	1.50565e+07	8.66603e+06	6.79179e+06	9.36734e+06	976976	1.01268e+07	8.99129e+06	5.56958e+06	8.03844e+06	1.86932e+06	1.19935e+07	6.17527e+06	9.35276e+06	1.36445e+06	8.46895e+06
A1618	A1618_(+/-)-CP 47,497-C8-Homolog	Reference4913	NEG	0.978	331.264	C22 H36 O2	(+/-)-CP 47,497-C8-Homolog	-1.94101568240512e-06	-0.00584165510890885	34.4167042948194	3	mzCloud	NA	NA	NA	NA	NA	NA	NA	NA	NA	1.006e+06	895954	1.81611e+06	2.19149e+06	2.03401e+06	9.16853e+06	1.54163e+06	634866	570526	1.2146e+06	7.02067e+07	5.8837e+06	2.1105e+06	1.06791e+06	327450	8.51387e+07	787923	777924	2.31351e+06	3.56434e+07	1.12666e+07
A958	A958_(+/-)-CP 55,940	1.089_375.29083	NEG	1.089	375.291	C24 H40 O3	(+/-)-CP 55,940	0.00034054932865501	0.904999653014172	56.4738031062299	3	mzCloud	NA	NA	NA	NA	NA	NA	NA	NA	NA	4.3882e+06	5.15916e+06	903296	4.3665e+06	3.6814e+06	5.6087e+06	2.47023e+07	9.4212e+06	4.78166e+07	1.64225e+06	5.41439e+06	1.27978e+07	1.46277e+07	2.93716e+07	1.54376e+07	4.5243e+06	2.1635e+07	1.49448e+07	1.25131e+06	1.60946e+06	1.14652e+07
A1099	A1099_(+/-)-threo-Methylnaphthidate	11.83_284.16477	POS	11.83	284.165	C18 H21 N O2	(+/-)-threo-Methylnaphthidate	0.00026322771549303	0.929616794812841	42.0231578364463	3	mzCloud	NA	NA	NA	NA	NA	NA	NA	NA	NA	12508.4	11764.2	1.06552e+06	11065.5	10355.9	24296.6	5.23334e+06	10325.7	17424.5	12539.3	44872.7	11529.2	16633	1.57663e+06	24799.7	33025.7	11364.3	2.63689e+06	3.24526e+06	41306.3	702573
C514	C514_(+/-)11-HETE	8.958_319.22739	NEG	8.958	319.227	C20 H32 O3	(+/-)11-HETE	-0.00047354941693811	-1.47875529805766	92.7650934554879	2	mzCloud	NA	NA	NA	NA	NA	NA	NA	NA	NA	592202	611672	235941	337307	324925	2.8036e+06	372994	389846	409992	293583	7.1531e+06	2.17211e+06	334996	818949	264398	8.12937e+06	323056	374520	243590	1.7672e+07	2.19291e+06
A574	A574_(+/-)12(13)-DiHOME	HMDB0004705	POS	0.788	297.242	C18 H34 O4	(+/-)12(13)-DiHOME	-18.01072305298	-57314.1414920899	93.3992660910993	2	mzCloud	C14829	HMDB0004705	Lipids and lipid-like molecules	Fatty acids and conjugates	Fatty Acyls	Fatty acyls[FA]	Lipid metabolism	Linoleic acid metabolism	map00591 Linoleic acid metabolism;	3.76697e+07	9.69154e+06	1.66099e+07	2.70554e+07	1.042e+07	1.55103e+07	2.07756e+07	1.62859e+07	2.59041e+07	9.26474e+06	2.1641e+07	6.00024e+06	3.2299e+07	1.21186e+07	5.42193e+07	3.64377e+07	3.28107e+07	1.18518e+07	7.62627e+06	8.59274e+07	2.4506e+07
A1172	A1172_(+/-)19(20)-DiHDPA	2.382_361.23895	NEG	2.382	361.239	C22 H34 O4	(+/-)19(20)-DiHDPA	0.00051984671870286	1.4350666003338	45.1859580761352	3	mzCloud	NA	NA	NA	NA	NA	NA	NA	NA	NA	195657	239845	369900	230702	190619	246742	1.35333e+06	209125	760038	202566	1.73471e+06	896251	313969	197145	806127	2.43295e+06	233803	4.59444e+06	272331	6.17671e+06	1.08285e+06
A156	A156_(+/-)8(9)-DiHET	1.369_337.23869	NEG	1.369	337.239	C20 H34 O4	(+/-)8(9)-DiHET	0.00025226572284964	0.745806127983738	84.4746572346989	2	mzCloud	NA	NA	NA	NA	NA	NA	NA	NA	NA	209809	194564	202911	260884	210679	161700	374170	347115	1.0434e+06	685735	2.68649e+07	177661	142799	102440	438812	3.94254e+07	117674	189817	341423	3.33087e+07	5.24003e+06
A133	A133_(+/-)9,10-dihydroxy-12Z-octadecenoic acid	1.078_313.23866	NEG	1.078	313.239	C18 H34 O4	(+/-)9,10-dihydroxy-12Z-octadecenoic acid	0.00021995239427496	0.699937621044797	90.837176942239	2	mzCloud	NA	NA	NA	NA	NA	NA	NA	NA	NA	2.52383e+07	7.0085e+06	9.96472e+06	1.69862e+07	9.98776e+06	1.07044e+08	1.08357e+07	1.47666e+07	2.66415e+07	1.19742e+07	1.48663e+07	1.67927e+07	2.7035e+07	1.19388e+07	3.39645e+07	4.85096e+07	1.72975e+07	1.12397e+07	1.10886e+07	6.1616e+07	2.47398e+07
A112	A112_(+/-)9-HpODE	0.962_293.21233	NEG	0.962	293.212	C18 H32 O4	(+/-)9-HpODE	-18.0104504032644	-57683.2686775313	89.3585421601717	2	mzCloud	NA	NA	NA	NA	NA	NA	NA	NA	NA	8.00743e+06	8.89587e+06	1.26607e+06	1.22705e+07	9.94972e+06	7.74738e+07	4.35679e+06	1.15225e+07	1.93439e+07	3.31372e+06	1.1304e+08	2.24203e+07	8.6895e+06	2.21263e+06	3.58053e+07	9.76864e+07	6.39865e+06	2.84078e+06	7.6182e+06	1.63774e+08	3.08443e+07
C2357	C2357_(+/-)N-(1-methyl-2-hydroxy-2-phenyl-ethyl) arachidonyl amine	8.211_438.33655	POS	8.211	438.337	C29 H43 N O2	(+/-)N-(1-methyl-2-hydroxy-2-phenyl-ethyl) arachidonyl amine	-0.0001082684375433	-0.247567263076542	NA	4	NA	NA	NA	NA	NA	NA	NA	NA	NA	NA	44444.8	40293.3	38509.4	41838.7	36155.2	519528	40629.3	36502.8	37605.3	41963.9	2.81841e+06	37567.4	39504.4	42693.4	43242.2	859252	42702.2	48137.1	36422.9	1.23823e+06	304182
C3413	C3413_(-)-Abscisic acid	HMDB0243505	POS	5.468	265.143	C15 H20 O4	(-)-Abscisic acid	8.74358164537625e-06	0.0331025546766441	NA	4	HMDB	NA	HMDB0243505	Lipids and lipid-like molecules	Sesquiterpenoids	Prenol lipids	Terpenoids	NA	NA	NA	2.36147e+06	2.02006e+06	1.05223e+06	2.11821e+06	1.79647e+06	1.02454e+06	1.43688e+06	1.51454e+06	1.2605e+06	1.50978e+06	201725	1.16155e+06	1.22381e+06	1.24202e+06	2.16964e+06	526296	2.5991e+06	647682	1.41427e+06	366106	1.38234e+06
C1893	C1893_(-)-Camphanic acid	PB01703	POS	0.71	216.123	C10 H14 O4	(-)-Camphanic acid	17.0267010946716	85954.7130108608	27.4882636149007	3	Public	NA	NA	NA	NA	NA	NA	NA	NA	NA	5.34022e+06	7.97123e+06	3.21689e+06	6.35037e+06	5.13926e+06	2.17868e+06	4.49336e+06	5.13796e+06	5.07493e+06	4.98428e+06	1.50383e+06	3.95408e+06	5.20994e+06	7.12855e+06	6.60801e+06	2.22158e+06	2.31739e+06	4.10868e+06	3.69762e+06	2.7032e+06	4.467e+06
A668	A668_(-)-Corey lactone	Reference1202	NEG	3.089	171.067	C8 H12 O4	(-)-Corey lactone	0.00036559218466436	2.12462732391253	65.3461563880093	2	mzCloud	NA	NA	NA	NA	NA	NA	NA	NA	NA	1.27565e+07	7.64553e+06	9.04537e+06	9.80198e+06	1.36841e+07	3.53303e+06	9.11082e+06	8.83628e+06	5.11226e+06	6.79355e+06	1.97103e+06	7.25268e+06	5.36812e+06	4.63098e+06	6.02102e+06	3.53437e+06	6.73995e+06	6.76023e+06	7.83468e+06	2.6781e+06	6.95553e+06
A2215	A2215_(-)-Fusicoplagin A	2.811_437.25464	NEG	2.811	437.255	C24 H38 O7	(-)-Fusicoplagin A	0.00016196187499417	0.369555120335878	NA	4	NA	NA	NA	NA	NA	NA	NA	NA	NA	NA	122639	312675	252711	302795	96924.1	84388.6	98733.4	66556.3	275699	156106	130991	187674	288653	3.73983e+06	191507	109743	133879	104745	129336	131239	345841
C3369	C3369_(-)-Huperzine A (HupA)	HMDB0242212	POS	2.913	281.106	C15 H18 N2 O	(-)-Huperzine A (HupA)	37.9571755846078	156755.90851825	7.28835474114302	4	Public	NA	HMDB0242212	Organoheterocyclic compounds	Quinolones and derivatives	Quinolines and derivatives	Quinolones and derivatives	NA	NA	NA	2.91689e+06	2.83544e+06	2.05969e+06	3.19564e+06	1.4518e+06	228021	2.19065e+06	1.47115e+06	3.85939e+06	1.46679e+06	249733	1.99717e+06	2.58619e+06	2.98239e+06	3.03964e+06	1.23543e+06	374548	1.95249e+06	2.31665e+06	80548.8	1.92451e+06
A2244	A2244_(-)-Jolkinol B	3.109_463.24707	NEG	3.109	463.247	C29 H36 O5	(-)-Jolkinol B	-0.00192713750004714	-4.15102090729108	NA	4	NA	NA	NA	NA	NA	NA	NA	NA	NA	NA	511149	945881	310033	874859	102243	113865	270236	330577	2.63562e+06	448494	966791	292028	2.81321e+06	121193	9.1819e+06	265256	120995	86493.6	212951	884565	1.07442e+06
A3116	A3116_(-)-Parthenolide	HMDB0242219	NEG	1.047	247.134	C15 H20 O3	(-)-Parthenolide	0.00010456716444196	0.421401789512263	NA	4	HMDB	NA	HMDB0242219	Lipids and lipid-like molecules	Terpene lactones	Prenol lipids	Terpenoids	NA	NA	NA	5.08515e+06	4.15339e+06	5.84216e+06	1.13414e+07	4.3079e+06	1.78403e+06	4.02512e+06	4.35828e+06	2.27554e+07	1.86029e+06	7.27762e+06	729579	1.14816e+07	73388.3	7.25794e+07	1.11866e+06	5.4895e+06	200338	1.20672e+06	418140	8.3044e+06
C2431	C2431_(-)-Pellynol A	9.306_497.39960	POS	9.306	497.4	C33 H52 O3	(-)-Pellynol A	0.00067517796878746	1.36017190276803	NA	4	NA	NA	NA	NA	NA	NA	NA	NA	NA	NA	675037	797642	487157	792735	495582	73314.3	611531	413076	704935	294401	107385	504724	249090	433250	738595	69491	709150	484279	1.00256e+06	143313	489363
A3152	A3152_(-)-Slaframine	HMDB0243523	POS	4.442	199.144	C10 H18 N2 O2	(-)-Slaframine	0.00015970801507592	0.806049117156019	NA	4	HMDB	NA	HMDB0243523	Organoheterocyclic compounds	NA	Indolizidines	Indolizidines	NA	NA	NA	3.50563e+07	4.34667e+07	4.11788e+08	3.44944e+07	8.99916e+07	2.07659e+07	1.20824e+08	5.65251e+07	1.0225e+08	1.38887e+08	8.03487e+07	1.11267e+08	1.15455e+08	4.64657e+07	2.70951e+07	1.27308e+08	7.40056e+07	7.58675e+07	8.28436e+07	2.77681e+07	9.11237e+07
C3415	C3415_(-)-Sparteine	HMDB0243524	POS	5.841	235.217	C15 H26 N2	(-)-Sparteine	-1.74998437501017e-05	-0.0747187298951818	NA	4	HMDB	NA	HMDB0243524	Alkaloids and derivatives	Sparteine, lupanine, and related alkaloids	Lupin alkaloids	Alkaloids and derivatives	NA	NA	NA	30312.7	30132.4	30261	33597.3	30973.3	186560	28711.6	29143.5	33404.6	31420.1	3.92943e+06	30455.1	32351.8	32329.4	37506.6	97006	32919.3	26836.7	140143	55554	243953
A3115	A3115_(-)-cis-beta-Elemene	HMDB0242206	NEG	0.973	249.186	C15 H24	(-)-cis-beta-Elemene	6.03623502968276e-05	0.295621727076642	NA	4	HMDB	NA	HMDB0242206	Lipids and lipid-like molecules	Sesquiterpenoids	Prenol lipids	Terpenoids	NA	NA	NA	1.84041e+06	877936	579645	750086	954399	1.80066e+07	1.75085e+06	2.28374e+06	4.60113e+06	838422	9.79312e+07	3.47272e+06	2.01552e+06	4.58633e+06	4.05079e+06	9.324e+07	1.54059e+06	1.78015e+06	1.84996e+06	2.6628e+08	2.54615e+07
C1088	C1088_(1'S,2'R,4'S,7'R,9'R,10'R,11'S)-4',10'-dihydroxy-2'-(hydroxymethyl)-1',5'-dimethyl-8'-oxaspiro[oxirane-2,12'-tricyclo[7.2.1.0	2.826_363.14108	POS	2.826	363.141	C17 H24 O7	(1'S,2'R,4'S,7'R,9'R,10'R,11'S)-4',10'-dihydroxy-2'-(hydroxymethyl)-1',5'-dimethyl-8'-oxaspiro[oxirane-2,12'-tricyclo[7.2.1.0	21.9815965428145	64622.8257648072	33.0074712142849	3	mzCloud	NA	NA	NA	NA	NA	NA	NA	NA	NA	7.6447e+06	6.97437e+06	6.73461e+06	6.87149e+06	6.35471e+06	3.10917e+06	6.97367e+06	5.74331e+06	4.99769e+06	6.77734e+06	1.31199e+06	5.29376e+06	6.60424e+06	9.59217e+06	7.54884e+06	2.63111e+06	8.3563e+06	4.3406e+06	5.43741e+06	1.53015e+06	5.74138e+06
A225	A225_(1'S,2'S)-3',11'-dihydroxy-1',2',5'-trimethyl-8'-oxaspiro[oxirane-2,12'-tricyclo[7.2.1.0	12.668_303.11844	POS	12.668	303.118	C15 H20 O5	(1'S,2'S)-3',11'-dihydroxy-1',2',5'-trimethyl-8'-oxaspiro[oxirane-2,12'-tricyclo[7.2.1.0	21.9800884907031	78463.5856645041	65.619466798531	2	mzCloud	NA	NA	NA	NA	NA	NA	NA	NA	NA	1.12764e+06	973310	1.03e+06	718882	1.17791e+06	356688	1.32944e+06	816344	450545	1.07273e+06	36394.7	954659	617317	1.13795e+06	196732	46832.9	1.96229e+06	9213.86	844513	33717	744656
C2029	C2029_(1,3-Phenylenedioxy)diacetic acid	Reference7275	POS	5.021	227.055	C10 H10 O6	(1,3-Phenylenedioxy)diacetic acid	0.00016738499351731	0.740485151819414	22.8578713534772	3	mzCloud	NA	NA	NA	NA	NA	NA	NA	NA	NA	945100	943958	1.16799e+06	2.68166e+06	4.04208e+06	214863	1.14713e+06	940381	1.31997e+06	916385	103496	804880	762681	1.09029e+06	947700	206759	1.01079e+06	618444	576783	155637	1.02985e+06
C3375	C3375_(1-(5-Fluoropentyl)-1H-indol-3-yl)(4-methylnaphthalen-1-yl)methanone	HMDB0242280	POS	4.822	374.191	C25 H24 F N O	(1-(5-Fluoropentyl)-1H-indol-3-yl)(4-methylnaphthalen-1-yl)methanone	-6.28999999889857e-05	-0.168549475700568	NA	4	HMDB	NA	HMDB0242280	Organoheterocyclic compounds	Naphthoylindoles	Indoles and derivatives	Indole and derivatives	NA	NA	NA	84162.5	102422	172723	70818	359807	1.55545e+06	192190	375312	115705	128130	2.41169e+06	763689	202178	469157	71713.6	1.66045e+06	303342	618088	415019	4.4805e+06	727628
C3376	C3376_(1-(5-Fluoropentyl)-1H-indol-3-yl)(naphthalen-1-yl)methanone	HMDB0242281	POS	1.712	360.177	C24 H22 F N O	(1-(5-Fluoropentyl)-1H-indol-3-yl)(naphthalen-1-yl)methanone	0.00070741149426112	1.96958088093115	NA	4	HMDB	NA	HMDB0242281	Organoheterocyclic compounds	Naphthoylindoles	Indoles and derivatives	Indole and derivatives	NA	NA	NA	4.28136e+06	4.16765e+06	1.32731e+06	4.1763e+06	3.54483e+06	1.32233e+06	2.03289e+06	2.62533e+06	6.29021e+06	1.60059e+06	1.69893e+06	2.9695e+06	3.71962e+06	5.05695e+06	1.29223e+07	6.51023e+06	1.89216e+06	2.29261e+06	3.74209e+06	1.66873e+07	4.44302e+06
A2539	A2539_(10S)-Juvenile hormone III acid diol;	C16506	POS	1.131	271.19	C15 H26 O4	(10S)-Juvenile hormone III acid diol;	1.10168400055954e-05	0.0407754579441747	NA	4	KEGG	C16506	NA	NA	NA	NA	NA	Metabolism of terpenoids and polyketides	Insect hormone biosynthesis	NA	2.52828e+06	2.77113e+06	2.06982e+06	4.15344e+06	4.89779e+06	3.12228e+06	6.81224e+06	6.11711e+06	868307	434725	57285.4	2.06051e+06	684116	3.95033e+06	1.35025e+06	49992.3	2.86617e+06	1.57206e+06	1.0669e+06	62729.6	2.37477e+06
A1673	A1673_(10Z)-6,10-Bis(hydroxymethyl)-3-methylene-2-oxo-2,3,3a,4,5,6,7,8,9,11a-decahydrocyclodeca[b]furan-4-yl methacrylate	Reference7449	NEG	10.943	395.172	C19 H26 O6	(10Z)-6,10-Bis(hydroxymethyl)-3-methylene-2-oxo-2,3,3a,4,5,6,7,8,9,11a-decahydrocyclodeca[b]furan-4-yl methacrylate	46.0059256718931	131380.585503636	52.2534336547027	3	mzCloud	NA	NA	NA	NA	NA	NA	NA	NA	NA	7.40193e+06	6.98708e+06	2.56303e+07	6.54094e+06	2.68723e+07	2.92056e+06	1.40871e+07	9.69397e+06	2.62022e+06	1.09074e+07	182313	1.12795e+07	4.93299e+06	7.29911e+06	815940	498372	2.05671e+07	7.31328e+06	8.34893e+06	97612.3	8.74985e+06
C2962	C2962_(10Z,13Z,16Z,19Z,22Z)-Octacosapentaenoic acid; 10Z,13Z,16Z,19Z,22Z-Octacosapentaenoic acid; (10Z,13Z,16Z,19Z,22Z)-Octacosa-10,13,16,19,22-pentaenoic acid;	C21966	POS	9.805	415.357	C28 H46 O2	(10Z,13Z,16Z,19Z,22Z)-Octacosapentaenoic acid; 10Z,13Z,16Z,19Z,22Z-Octacosapentaenoic acid; (10Z,13Z,16Z,19Z,22Z)-Octacosa-10,13,16,19,22-pentaenoic acid;	0.00024259468756326	0.585482843079316	NA	4	KEGG	C21966	NA	FA Fatty acyls	FA0103 Unsaturated fatty acids	FA01 Fatty Acids and Conjugates	Fatty acyls[FA]	NA	NA	NA	580203	644093	376719	830479	324204	95143.7	412885	378004	1.03336e+06	364833	120079	428973	582201	372561	809275	91300.3	490152	161407	228351	205093	426466
C1547	C1547_(11E,15Z)-9,10,13-trihydroxyoctadeca-11,15-dienoic acid	6.573_346.25922	POS	6.573	346.259	C18 H32 O5	(11E,15Z)-9,10,13-trihydroxyoctadeca-11,15-dienoic acid	17.0269678483578	51875.9058548447	50.8363267238275	3	mzCloud	NA	NA	NA	NA	NA	NA	NA	NA	NA	1.59056e+06	882593	1.58566e+06	1.51262e+06	1.68938e+06	867650	980268	1.12667e+06	1.09042e+06	1.00103e+06	534389	1.01412e+06	887497	1.95841e+06	1.28543e+06	680576	1.89675e+06	1.31368e+06	1.85343e+06	416573	1.20839e+06
C2339	C2339_(11Z)-8,18-propano-retinal	7.815_325.25331	POS	7.815	325.253	C23 H32 O	(11Z)-8,18-propano-retinal	0.00072188491816405	2.22635419394508	NA	4	NA	NA	NA	NA	NA	NA	NA	NA	NA	NA	53146.5	85460.5	82820.2	44872.8	95892	130221	2.24079e+06	79755.4	94536.1	98372.3	143511	80872.8	89206.9	62021.8	89153.5	102317	59844.2	2.51705e+06	83650	158310	319590
A3124	A3124_(12R)-12-Hydroxyoctadec-9-enoic acid	HMDB0242322	POS	0.735	299.258	C18 H34 O3	(12R)-12-Hydroxyoctadec-9-enoic acid	-0.00019735036005386	-0.661692654240755	NA	4	HMDB	NA	HMDB0242322	Lipids and lipid-like molecules	Fatty acids and conjugates	Fatty Acyls	Fatty acyls[FA]	NA	NA	NA	1.66517e+07	1.50642e+07	1.40075e+07	1.72127e+07	9.73865e+06	2.47314e+07	1.63431e+07	1.97784e+07	3.59219e+07	1.9057e+07	1.92035e+07	7.43687e+06	5.2483e+07	4.0618e+06	4.00613e+07	3.83997e+07	1.52104e+07	2.33349e+07	9.40324e+06	2.76655e+07	2.12883e+07
A3125	A3125_(12S)-12-Hydroxyicosa-2,4,6,8-tetraenoic acid	HMDB0242323	POS	0.806	321.242	C20 H32 O3	(12S)-12-Hydroxyicosa-2,4,6,8-tetraenoic acid	-0.00010702628804892	-0.334211562347846	NA	4	HMDB	NA	HMDB0242323	Lipids and lipid-like molecules	Eicosanoids	Fatty Acyls	Fatty acyls[FA]	NA	NA	NA	6.79561e+06	6.25858e+06	3.03713e+06	7.6848e+06	4.20723e+06	4.51669e+06	4.41906e+06	3.67093e+06	1.01349e+07	3.17145e+06	7.95133e+06	2.31735e+06	6.07811e+06	5.47382e+06	2.47419e+07	4.6294e+06	4.82028e+06	4.16096e+06	4.81514e+06	1.45755e+07	6.673e+06
A829	A829_(12Z)-9,10,11-trihydroxyoctadec-12-enoic acid	0.751_313.23722	POS	0.751	313.237	C18 H34 O5	(12Z)-9,10,11-trihydroxyoctadec-12-enoic acid	-18.0108266031872	-54538.4949433005	48.7761876634152	3	mzCloud	NA	NA	NA	NA	NA	NA	NA	NA	NA	2.92077e+06	1.62184e+06	877405	3.73966e+06	1.51881e+06	1.49481e+06	1.69216e+06	1.24147e+06	3.35621e+06	1.06223e+06	5.47015e+06	891201	1.56595e+06	1.21399e+06	6.53556e+06	2.72438e+06	2.46719e+06	1.10062e+06	1.11991e+06	1.47965e+06	2.2047e+06
A2175	A2175_(12Z,15S,18S)-15-hydroxy-18-bromo-12,16,17-octadecatrienoic acid	13.194_371.12135	NEG	13.194	371.121	C18 H29 Br O3	(12Z,15S,18S)-15-hydroxy-18-bromo-12,16,17-octadecatrienoic acid	-0.0013852961760108	-3.72261346558299	NA	4	NA	NA	NA	NA	NA	NA	NA	NA	NA	NA	2.47845e+06	2.43623e+06	154680	1.63071e+06	3.90918e+06	186746	2.79334e+06	872264	588723	3.69436e+06	60741.6	4.21184e+06	379027	176001	118857	51783	2.55095e+06	232253	485873	58518.5	1.35353e+06
A760	A760_(15Z)-9,12,13-Trihydroxy-15-octadecenoic acid	Reference7727	NEG	2.086	329.234	C18 H34 O5	(15Z)-9,12,13-Trihydroxy-15-octadecenoic acid	0.00032940888780785	0.997481423690347	70.2349068551645	2	mzCloud	NA	NA	NA	NA	NA	NA	NA	NA	NA	2.19556e+06	5.35328e+06	1.24189e+06	7.74612e+06	1.57433e+06	1.70486e+06	873061	1.23208e+06	1.43873e+07	866222	3.71277e+07	2.18361e+06	1.74204e+06	6.14037e+06	2.50201e+07	1.60975e+07	1.99738e+06	1.31204e+06	2.37772e+06	3.03861e+07	8.07797e+06
A2126	A2126_(17Z)-1alpha,25-dihydroxy-26,27-dimethyl-17,20,22,22,23,23-hexadehydrovitamin D3 / (17Z)-1alpha,25-dihydroxy-26,27-dimethyl-17,20,22,22,23,23-hexadehydrocholecalciferol	1.486_437.30394	NEG	1.486	437.304	C29 H42 O3	(17Z)-1alpha,25-dihydroxy-26,27-dimethyl-17,20,22,22,23,23-hexadehydrovitamin D3 / (17Z)-1alpha,25-dihydroxy-26,27-dimethyl-17,20,22,22,23,23-hexadehydrocholecalciferol	-0.00218013363479486	-4.97391514693823	NA	4	NA	NA	NA	NA	NA	NA	NA	NA	NA	NA	433913	501234	182913	476918	180715	143309	191337	187175	738342	308135	1.06731e+08	170150	540236	101719	3.7718e+06	1.11141e+08	187770	287320	404609	2.31284e+08	2.28982e+07
C3377	C3377_(18E)-20-Methoxy-4,8,13,17-tetramethyl-20-oxoicosa-2,4,6,8,10,12,14,16,18-nonaenoic acid	HMDB0242302	POS	9.203	395.222	C25 H30 O4	(18E)-20-Methoxy-4,8,13,17-tetramethyl-20-oxoicosa-2,4,6,8,10,12,14,16,18-nonaenoic acid	0.00015963992211709	0.404957095303959	NA	4	HMDB	NA	HMDB0242302	Lipids and lipid-like molecules	Diterpenoids	Prenol lipids	Terpenoids	NA	NA	NA	1.20921e+06	921301	1.36008e+06	904943	1.1413e+06	5.02578e+06	1.19693e+06	2.11677e+06	2.19132e+06	1.56664e+06	2.06978e+06	1.78859e+06	2.5699e+06	2.09713e+06	738966	4.35961e+06	1.70839e+06	2.91658e+06	948838	6.2011e+06	2.15166e+06
A3121	A3121_(1Ar,3S,4aS,7S,8aS)-3-[(1S,2R,3R)-3-[(2R,5S)-5,6-dimethylheptan-2-yl]-2-(2-hydroxyethyl)-2-methylcyclopentyl]-7-hydroxy-4a-methyl-2,3,5,6,7,8-hexahydro-1aH-naphtho[4,4a-b]oxiren-4-one	HMDB0242305	NEG	0.763	447.348	C28 H48 O4	(1Ar,3S,4aS,7S,8aS)-3-[(1S,2R,3R)-3-[(2R,5S)-5,6-dimethylheptan-2-yl]-2-(2-hydroxyethyl)-2-methylcyclopentyl]-7-hydroxy-4a-methyl-2,3,5,6,7,8-hexahydro-1aH-naphtho[4,4a-b]oxiren-4-one	0.00022862342927965	0.509915796150663	NA	4	HMDB	NA	HMDB0242305	Lipids and lipid-like molecules	Ergostane steroids	Steroids and steroid derivatives	Steroids and derivatives	NA	NA	NA	1.90043e+06	1.65099e+06	233499	2.4595e+06	697507	581708	1.31781e+06	1.27806e+06	4.59672e+06	493060	1.74544e+06	1.52928e+06	3.31752e+06	397768	7.25508e+06	1.21539e+06	1.62663e+06	429261	475254	1.14417e+06	1.71725e+06
A3123	A3123_(1E)-1-{[(Diaminomethylidene)amino]imino}-2,3-dihydro-1H-indene-4-carboximidamide	HMDB0242312	POS	4.146	231.134	C11 H14 N6	(1E)-1-{[(Diaminomethylidene)amino]imino}-2,3-dihydro-1H-indene-4-carboximidamide	-0.00114815433815352	-4.98919890666606	NA	4	HMDB	NA	HMDB0242312	Benzenoids	NA	Indanes	Benzene and derivatives	NA	NA	NA	4.12385e+06	4.71403e+06	7.19383e+06	3.83888e+06	4.89271e+06	7.20331e+06	4.19352e+06	2.53375e+06	5.71779e+06	6.80772e+06	1.68093e+06	4.6745e+06	4.62633e+06	1.1383e+06	3.37564e+06	870704	1.88458e+06	4.61839e+06	1.00184e+07	909437	4.25083e+06
A942	A942_(1E)-5-hydroxy-1,7-diphenylhept-1-en-3-one	1.076_265.17988	POS	1.076	265.18	C19 H20 O2	(1E)-5-hydroxy-1,7-diphenylhept-1-en-3-one	-15.9738560715336	-57019.6871147215	63.1682353511196	3	mzCloud	NA	NA	NA	NA	NA	NA	NA	NA	NA	1.56169e+06	1.12645e+06	1.5696e+06	3.11522e+06	4.43438e+06	1.07975e+06	3.36988e+06	3.44475e+06	1.1404e+06	2.2983e+06	109031	2.02679e+06	1.30548e+06	3.9378e+06	1.36057e+06	351100	3.13041e+06	2.42487e+06	2.65417e+06	378588	2.04096e+06
A3122	A3122_(1E,4E)-1,5-Bis(4-hydroxy-3-methoxyphenyl)penta-1,4-dien-3-one	HMDB0242309	NEG	6.867	325.108	C19 H18 O5	(1E,4E)-1,5-Bis(4-hydroxy-3-methoxyphenyl)penta-1,4-dien-3-one	-0.0002672713281413	-0.819560526270303	NA	4	HMDB	NA	HMDB0242309	Phenylpropanoids and polyketides	Hydroxycinnamic acids and derivatives	Cinnamic acids and derivatives	Polyketides[PK]	NA	NA	NA	450979	904416	2.58742e+06	269522	159876	1.1419e+06	809175	1.13723e+06	284461	476446	416747	1.52554e+06	612159	889711	118189	503435	1.33862e+06	1.25903e+06	1.34383e+06	794595	851164
C1892	C1892_(1E,4E)-1,5-bis(4-methoxyphenyl)penta-1,4-dien-3-one	PB01702	POS	5.169	317.113	C19 H18 O3	(1E,4E)-1,5-bis(4-methoxyphenyl)penta-1,4-dien-3-one	21.9803033434031	74731.0120791274	43.2363981204282	3	Public	NA	NA	NA	NA	NA	NA	NA	NA	NA	2.5585e+06	2.58574e+06	1.68784e+06	2.04328e+06	1.79338e+06	668281	2.35866e+06	1.67521e+06	1.64831e+06	1.88432e+06	348516	1.57796e+06	1.3849e+06	2.14287e+06	2.11389e+06	579953	3.66188e+06	1.18134e+06	1.95055e+06	371902	1.71086e+06
A3129	A3129_(1R)-1-Amino-2-sulfanylethanesulfinic acid	HMDB0242353	NEG	4.903	139.985	C2 H7 N O2 S2	(1R)-1-Amino-2-sulfanylethanesulfinic acid	0.00017435684117117	1.23664508626201	NA	4	HMDB	NA	HMDB0242353	Organic acids and derivatives	Sulfinic acids	Sulfinic acids and derivatives	Organic acids	NA	NA	NA	8.80629e+07	1.0834e+08	2.76068e+08	6.67929e+07	5.77128e+07	4.06891e+08	1.12051e+08	2.24973e+08	5.64915e+07	8.50287e+07	3.74383e+08	1.41604e+08	1.74482e+08	2.5078e+08	4.43511e+07	1.17271e+08	2.00112e+08	1.65498e+08	8.73054e+07	3.35219e+08	1.68671e+08
A3130	A3130_(1R)-trans-Phenothrin	HMDB0242366	POS	1.53	368.222	C23 H26 O3	(1R)-trans-Phenothrin	0.00016097317899266	0.459676201208686	NA	4	HMDB	NA	HMDB0242366	Lipids and lipid-like molecules	Fatty acid esters	Fatty Acyls	Fatty acyls[FA]	NA	NA	NA	22426.2	20324.1	1.40952e+06	20830.3	22277.6	22164.3	20666.4	19225.2	27527.5	19252.5	44209.6	16681.6	24880.8	18348.9	36559.8	35984.2	21562.3	16769.8	20436.1	41945.2	94079.7
A3449	A3449_(1R,2R)-2-Amino-1-(4-nitrophenyl)propane-1,3-diol	HMDB0247315	NEG	8.373	211.073	C9 H12 N2 O4	(1R,2R)-2-Amino-1-(4-nitrophenyl)propane-1,3-diol	0.00027927210459211	1.31682615399006	NA	4	HMDB	NA	HMDB0247315	Benzenoids	Nitrobenzenes	Benzene and substituted derivatives	Benzene and derivatives	NA	NA	NA	1.51817e+07	1.5764e+07	2.54044e+07	1.2927e+07	1.81871e+07	6.86883e+06	2.68218e+07	1.34086e+07	1.23059e+07	2.15494e+07	1.32713e+06	1.62756e+07	1.36133e+07	2.20902e+07	5.01577e+06	1.27137e+06	1.48379e+07	1.60098e+07	1.24006e+07	1.25449e+06	1.36257e+07
A104	A104_(1R,2R,6R,9R)-2,11,11-trimethyl-3-oxotricyclo[4.3.2.0	0.901_251.16426	POS	0.901	251.164	C15 H22 O3	(1R,2R,6R,9R)-2,11,11-trimethyl-3-oxotricyclo[4.3.2.0	8.74698605457525e-05	0.349660003313396	71.0514880994832	2	mzCloud	NA	NA	NA	NA	NA	NA	NA	NA	NA	8.47892e+06	6.64305e+06	5.59521e+06	7.88564e+06	8.72816e+06	2.79281e+06	8.01374e+06	5.21405e+06	4.73679e+06	6.39303e+06	650338	5.97883e+06	5.82328e+06	2.66496e+06	5.59803e+06	1.47238e+06	7.50889e+06	3.58896e+06	5.04407e+06	1.53702e+06	5.21741e+06
C4219	C4219_(1R,2S,3R)-1-[(2E)-2-(1-Nitrosoethylidene)-1,3-dihydroimidazol-4-yl]butane-1,2,3,4-tetrol	HMDB0254230	NEG	0.712	244.093	C9 H15 N3 O5	(1R,2S,3R)-1-[(2E)-2-(1-Nitrosoethylidene)-1,3-dihydroimidazol-4-yl]butane-1,2,3,4-tetrol	-0.00048401527169517	-1.9747570801336	NA	4	HMDB	NA	HMDB0254230	Organic oxygen compounds	Carbohydrates and carbohydrate conjugates	Organooxygen compounds	Carbohydrates	NA	NA	NA	595185	803855	892159	579479	805906	1.94745e+06	880119	1.5884e+06	705212	616554	2.90183e+06	1.47894e+06	1.37276e+06	1.0522e+06	406272	2.20129e+06	1.4528e+06	2.29325e+06	584837	3.30453e+06	1.32315e+06
A215	A215_(1R,2S,3R,4R)-3-(Isobutylamino)-4-(3-pyridinyl)-1,2-cyclopentanediol	12.117_233.16483	POS	12.117	233.165	C14 H22 N2 O2	(1R,2S,3R,4R)-3-(Isobutylamino)-4-(3-pyridinyl)-1,2-cyclopentanediol	-18.0105709871274	-71993.8672491745	62.822451251682	2	mzCloud	NA	NA	NA	NA	NA	NA	NA	NA	NA	15134.9	14686.8	11621.2	13319.5	13378	33196.5	5.36658e+06	14045.2	21184.2	16113.4	54448.2	15708.1	20503.8	15029.2	30829.8	40080.5	12589.2	9.30649e+06	4.89286e+06	51952	997987
C3379	C3379_(1R,3As,4S,6aS)-1,4-di(benzo[d][1,3]dioxol-5-yl)hexahydrofuro[3,4-c]furan	HMDB0242327	NEG	0.716	353.102	C20 H18 O6	(1R,3As,4S,6aS)-1,4-di(benzo[d][1,3]dioxol-5-yl)hexahydrofuro[3,4-c]furan	-0.00098021117184998	-2.7680953258768	NA	4	HMDB	NA	HMDB0242327	Lignans, neolignans and related compounds	NA	Furanoid lignans	Lignans and related compounds	NA	NA	NA	87620.5	279513	663563	42197.3	33762.7	524246	82920.3	197001	388586	116240	1.39821e+06	131963	41315.7	132170	39763.4	944223	150282	221211	417962	5.70418e+06	579847
C4802	C4802_(1R,3R)-5-[(2E)-2-[(3As,7aS)-7a-methyl-1-[(Z,2R)-7,7,7-trifluoro-6-hydroxy-6-(trifluoromethyl)hept-4-en-2-yl]-3a,5,6,7-tetrahydro-3H-inden-4-ylidene]ethylidene]cyclohexane-1,3-diol	HMDB0260072	NEG	9.385	507.233	C26 H34 F6 O3	(1R,3R)-5-[(2E)-2-[(3As,7aS)-7a-methyl-1-[(Z,2R)-7,7,7-trifluoro-6-hydroxy-6-(trifluoromethyl)hept-4-en-2-yl]-3a,5,6,7-tetrahydro-3H-inden-4-ylidene]ethylidene]cyclohexane-1,3-diol	-0.00093850851635579	-1.84658089597367	NA	4	HMDB	NA	HMDB0260072	Lipids and lipid-like molecules	Vitamin D and derivatives	Steroids and steroid derivatives	Vitamins and derivatives	NA	NA	NA	884614	1.20856e+06	1.04534e+06	1.07008e+06	546794	9309.3	806973	467409	1.05027e+06	1.28585e+06	24449.9	609603	1.19676e+06	516896	1.34704e+06	117561	465930	380603	1.05927e+06	18343.4	705583
A960	A960_(1R,3R,8S,10R,13S,16S,17R)-6,12,17-Trihydroxy-16-methyl-8-(2-methyl-2-propanyl)-2,4,14,19-tetraoxahexacyclo[8.7.2.01,11 03,7 07,11 013,17]nonadecane-5,15,18-trione	1.097_405.11969	NEG	1.097	405.12	C20 H24 O10	(1R,3R,8S,10R,13S,16S,17R)-6,12,17-Trihydroxy-16-methyl-8-(2-methyl-2-propanyl)-2,4,14,19-tetraoxahexacyclo[8.7.2.01,11 03,7 07,11 013,17]nonadecane-5,15,18-trione	-64.0154185580703	-150931.011912836	28.3884043420652	3	mzCloud	NA	NA	NA	NA	NA	NA	NA	NA	NA	748695	351647	1.02332e+06	452098	189848	257175	797932	2.07283e+06	1.41154e+06	479636	1.85536e+06	289602	750817	1.11159e+06	2.22326e+06	3.22831e+06	1.63846e+06	1.26047e+06	222506	487159	1.04261e+06
C4803	C4803_(1R,3S,5E)-5-[(2E)-2-[(1R,3As,7aR)-1-[(2R,3E,5E)-7-ethyl-7-hydroxy-5-methylnona-3,5-dien-2-yl]-7a-methyl-2,3,3a,5,6,7-hexahydro-1H-inden-4-ylidene]ethylidene]-4-methylidenecyclohexane-1,3-diol	HMDB0260073	POS	10.595	469.366	C31 H48 O3	(1R,3S,5E)-5-[(2E)-2-[(1R,3As,7aR)-1-[(2R,3E,5E)-7-ethyl-7-hydroxy-5-methylnona-3,5-dien-2-yl]-7a-methyl-2,3,3a,5,6,7-hexahydro-1H-inden-4-ylidene]ethylidene]-4-methylidenecyclohexane-1,3-diol	-0.00195938567458143	-4.18350036354463	NA	4	HMDB	NA	HMDB0260073	Lipids and lipid-like molecules	Vitamin D and derivatives	Steroids and steroid derivatives	Vitamins and derivatives	NA	NA	NA	399912	300464	311227	233619	278992	1.60329e+07	370221	666021	282237	564332	4.1349e+07	1.28245e+06	168105	200333	341241	1.58321e+07	805714	1.05409e+06	293560	4.93198e+07	6.50432e+06
C4804	C4804_(1R,3S,5E)-5-[(2E)-2-[(1R,3As,7aR)-1-[(2R,3E,5E)-7-hydroxy-5,7-dimethylocta-3,5-dien-2-yl]-7a-methyl-2,3,3a,5,6,7-hexahydro-1H-inden-4-ylidene]ethylidene]-4-methylidenecyclohexane-1,3-diol	HMDB0260074	POS	9.072	441.336	C29 H44 O3	(1R,3S,5E)-5-[(2E)-2-[(1R,3As,7aR)-1-[(2R,3E,5E)-7-hydroxy-5,7-dimethylocta-3,5-dien-2-yl]-7a-methyl-2,3,3a,5,6,7-hexahydro-1H-inden-4-ylidene]ethylidene]-4-methylidenecyclohexane-1,3-diol	0.00011167573029524	0.253618814232007	NA	4	HMDB	NA	HMDB0260074	Lipids and lipid-like molecules	Vitamin D and derivatives	Steroids and steroid derivatives	Vitamins and derivatives	NA	NA	NA	6.20862e+07	9.6207e+07	9.13463e+07	7.78918e+07	4.73699e+07	7.62489e+06	4.58631e+07	5.71537e+07	5.31507e+07	4.50973e+07	1.21656e+07	3.3251e+07	6.33242e+07	2.64946e+07	8.14274e+07	6.28862e+06	8.1324e+07	2.96333e+07	4.1893e+07	5.59714e+06	4.82595e+07
C4805	C4805_(1R,3S,5Z)-5-[(2E)-2-[(1R,3As,7aR)-1-[(2R)-3-ethoxy-7-ethyl-7-hydroxynon-4-yn-2-yl]-7a-methyl-2,3,3a,5,6,7-hexahydro-1H-inden-4-ylidene]ethylidene]-4-methylidenecyclohexane-1,3-diol	HMDB0260076	POS	9.466	499.379	C32 H50 O4	(1R,3S,5Z)-5-[(2E)-2-[(1R,3As,7aR)-1-[(2R)-3-ethoxy-7-ethyl-7-hydroxynon-4-yn-2-yl]-7a-methyl-2,3,3a,5,6,7-hexahydro-1H-inden-4-ylidene]ethylidene]-4-methylidenecyclohexane-1,3-diol	0.00075816977340537	1.52129620398089	NA	4	HMDB	NA	HMDB0260076	Lipids and lipid-like molecules	Vitamin D and derivatives	Steroids and steroid derivatives	Vitamins and derivatives	NA	NA	NA	1.49355e+06	1.56569e+06	1.06844e+06	1.83985e+06	696152	219478	1.32694e+06	875906	1.71752e+06	1.13406e+06	224161	777974	1.67009e+06	1.45075e+06	1.81052e+06	187550	1.98549e+06	1.06787e+06	1.45985e+06	444629	1.15082e+06
C4806	C4806_(1R,3S,5Z)-5-[(2Z)-2-[(1R,3Ar,7aS)-1-[(2S)-1-[3-(2-hydroxypropan-2-yl)phenoxy]propan-2-yl]-7a-methyl-2,3,3a,5,6,7-hexahydro-1H-inden-4-ylidene]ethylidene]-4-methylidenecyclohexane-1,3-diol	HMDB0260077	POS	8.749	481.329	C31 H44 O4	(1R,3S,5Z)-5-[(2Z)-2-[(1R,3Ar,7aS)-1-[(2S)-1-[3-(2-hydroxypropan-2-yl)phenoxy]propan-2-yl]-7a-methyl-2,3,3a,5,6,7-hexahydro-1H-inden-4-ylidene]ethylidene]-4-methylidenecyclohexane-1,3-diol	-0.00194280976950267	-4.04479045899608	NA	4	HMDB	NA	HMDB0260077	Lipids and lipid-like molecules	Vitamin D and derivatives	Steroids and steroid derivatives	Vitamins and derivatives	NA	NA	NA	7.54759e+06	7.3536e+06	3.17167e+06	5.32881e+06	9.79256e+06	3.80854e+06	5.72873e+06	1.68808e+06	8.04767e+06	5.76674e+06	1.40667e+06	5.53384e+06	5.64841e+06	1.53446e+06	6.09332e+06	1.25681e+06	2.41064e+06	4.39618e+06	5.98539e+06	703715	4.66017e+06
C4881	C4881_(1R,3aR,5aR,5bR,9S,11aR)-3a,5a,5b,8,8,11a-hexamethyl-1-prop-1-en-2-yl-1,2,3,4,5,6,7,7a,9,10,11,11b,12,13,13a,13b-hexadecahydrocyclopenta[a]chrysen-9-ol	PB00868	POS	9.641	449.373	C30 H50 O	(1R,3aR,5aR,5bR,9S,11aR)-3a,5a,5b,8,8,11a-hexamethyl-1-prop-1-en-2-yl-1,2,3,4,5,6,7,7a,9,10,11,11b,12,13,13a,13b-hexadecahydrocyclopenta[a]chrysen-9-ol	21.9800619086719	51549.660041074	14.0250124870411	4	Public	NA	NA	NA	NA	NA	NA	NA	NA	NA	860574	515968	2.15184e+06	68927.4	431035	213164	74116.9	71521.9	91526.7	170795	261477	85424.4	1.75477e+06	72503.4	709584	195490	67352.5	229222	981380	380426	469355
C3382	C3382_(1R,4R,5S)-1-[(1S)-1-Hydroxy-2-methylpropyl]-4-propyl-6-oxa-2-azabicyclo[3.2.0]heptane-3,7-dione	HMDB0242338	POS	4.695	242.139	C12 H19 N O4	(1R,4R,5S)-1-[(1S)-1-Hydroxy-2-methylpropyl]-4-propyl-6-oxa-2-azabicyclo[3.2.0]heptane-3,7-dione	4.83101562451793e-05	0.200347837935694	NA	4	HMDB	NA	HMDB0242338	Organic acids and derivatives	Amino acids, peptides, and analogues	Carboxylic acids and derivatives	Amino acids, peptides, and analogues	NA	NA	NA	3.38121e+06	1.57055e+06	2.46615e+06	4.27399e+06	2.12088e+06	504272	1.34333e+06	2.05002e+06	3.21709e+06	1.89633e+06	989549	1.13474e+06	717773	3.55199e+06	2.60272e+06	977148	1.54382e+06	1.84309e+06	4.61175e+06	200611	2.04985e+06
A3127	A3127_(1R,4R,5S,6R)-4-Amino-2-oxabicyclo[3.1.0]hexane-4,6-dicarboxylic acid	HMDB0242337	NEG	13.793	186.041	C7 H9 N O5	(1R,4R,5S,6R)-4-Amino-2-oxabicyclo[3.1.0]hexane-4,6-dicarboxylic acid	0.00034759628368874	1.85832593445281	NA	4	HMDB	NA	HMDB0242337	Organic acids and derivatives	Amino acids, peptides, and analogues	Carboxylic acids and derivatives	Amino acids, peptides, and analogues	NA	NA	NA	1.85653e+07	2.12927e+07	4.02525e+07	9.76057e+06	2.11633e+07	7.6698e+07	2.85262e+07	1.06357e+07	2.73961e+07	4.85381e+07	5.3739e+07	2.45305e+07	2.96806e+07	9.87168e+06	1.93287e+07	3.64881e+07	2.52442e+07	7.24292e+07	1.34832e+08	2.31729e+07	3.66073e+07
C3686	C3686_(1R,4R,5S,9R,10S,13R)-5,9-Dimethyl-14-methylidenetetracyclo[11.2.1.01,10.04,9]hexadecane-5-carboxylic acid	HMDB0247185	POS	8.956	303.232	C20 H30 O2	(1R,4R,5S,9R,10S,13R)-5,9-Dimethyl-14-methylidenetetracyclo[11.2.1.01,10.04,9]hexadecane-5-carboxylic acid	-7.07891483102685e-05	-0.2342269721637	NA	4	HMDB	NA	HMDB0247185	Lipids and lipid-like molecules	Diterpenoids	Prenol lipids	Terpenoids	NA	NA	NA	1.6642e+06	2.3151e+06	716540	2.03246e+06	3.69413e+06	8.51861e+06	2.87771e+06	1.44484e+06	1.88149e+06	1.11737e+06	5.30467e+06	6.57649e+06	1.34401e+06	2.23232e+06	1.17609e+06	1.90324e+07	2.57782e+06	1.93167e+06	2.79086e+06	1.01005e+07	3.96647e+06
C459	C459_(1R,4aS)-7-(2-Hydroxypropan-2-yl)-1,4a-dimethyl-9-oxo-3,4,10,10a-tetrahydro-2H-phenanthrene-1-carboxylic acid	7.366_331.19033	POS	7.366	331.19	C20 H26 O4	(1R,4aS)-7-(2-Hydroxypropan-2-yl)-1,4a-dimethyl-9-oxo-3,4,10,10a-tetrahydro-2H-phenanthrene-1-carboxylic acid	-4.1745351040845e-05	-0.126430910244071	79.9990239054762	2	mzCloud	NA	NA	NA	NA	NA	NA	NA	NA	NA	1.12439e+06	1.05512e+06	922044	1.45835e+06	722195	142009	1.50453e+06	1.49914e+06	874028	769473	386834	1.21955e+06	1.25375e+06	3.66992e+06	941092	478337	1.84345e+06	5.73234e+06	2.39216e+06	1.26501e+06	1.46269e+06
A962	A962_(1R,4aS,5R,8aS)-5-(5-hydroxy-3-methylpentyl)-1,4a-dimethyl-6-methylidene-decahydronaphthalene-1-carboxylic acid	1.103_323.25803	POS	1.103	323.258	C20 H34 O3	(1R,4aS,5R,8aS)-5-(5-hydroxy-3-methylpentyl)-1,4a-dimethyl-6-methylidene-decahydronaphthalene-1-carboxylic acid	-5.73631203337754e-05	-0.178007692318701	36.6703921082294	3	mzCloud	NA	NA	NA	NA	NA	NA	NA	NA	NA	7.20942e+06	4.10722e+06	2.99029e+06	1.12705e+07	7.25988e+06	1.64988e+06	5.96368e+06	6.26145e+06	2.1401e+06	6.96878e+06	197120	3.82095e+06	1.50113e+06	7.07915e+06	2.70109e+06	679608	6.15959e+06	4.04833e+06	4.46352e+06	619547	4.35456e+06
C1384	C1384_(1R,5S,6S)-3-(hydroxymethyl)-5-{[(2Z)-2-methylbut-2-enoyl]oxy}-2-oxo-6-(propan-2-yl)cyclohex-3-en-1-yl (2E)-4-hydroxy-2-methylbut-2-enoate	4.671_398.21701	POS	4.671	398.217	C20 H28 O7	(1R,5S,6S)-3-(hydroxymethyl)-5-{[(2Z)-2-methylbut-2-enoyl]oxy}-2-oxo-6-(propan-2-yl)cyclohex-3-en-1-yl (2E)-4-hydroxy-2-methylbut-2-enoate	17.0262308280469	44784.2441660482	40.4246678407626	3	mzCloud	NA	NA	NA	NA	NA	NA	NA	NA	NA	3.87153e+06	3.47032e+06	3.22759e+06	3.31657e+06	2.90999e+06	1.94562e+06	3.25209e+06	1.86271e+06	3.38219e+06	3.25087e+06	660666	2.44911e+06	3.37571e+06	2.80086e+06	3.71326e+06	1.44637e+06	3.99101e+06	2.71514e+06	2.51493e+06	972559	2.75645e+06
A2645	A2645_(1R,5aS,6R)-4a-Hydroxy-1,4,4a,5,5a,6,9,10a-octahydrophenazine-1,6-dicarboxylate;	C21473	POS	1.013	293.113	C14 H16 N2 O5	(1R,5aS,6R)-4a-Hydroxy-1,4,4a,5,5a,6,9,10a-octahydrophenazine-1,6-dicarboxylate;	-6.94478906098084e-05	-0.237748999602404	NA	4	KEGG	C21473	NA	NA	NA	NA	NA	Biosynthesis of other secondary metabolites	Phenazine biosynthesis	map01100 Metabolic pathways;	698636	614255	494064	1.15406e+06	581984	261578	589280	326476	570439	467871	213605	483475	589363	574950	1.60121e+06	231436	595145	359307	431111	352734	559549
C3383	C3383_(1R,7S,13S,15S)-2,15-Dihydroxy-7-methyl-6-oxabicyclo[11.3.0]hexadeca-3,11-dien-5-one	HMDB0242339	POS	7.505	281.175	C16 H24 O4	(1R,7S,13S,15S)-2,15-Dihydroxy-7-methyl-6-oxabicyclo[11.3.0]hexadeca-3,11-dien-5-one	-8.36503905929931e-05	-0.298572828035551	NA	4	HMDB	NA	HMDB0242339	Phenylpropanoids and polyketides	NA	Macrolides and analogues	Polyketides[PK]	NA	NA	NA	453217	1.16852e+06	646504	957938	782662	74179.9	2.14872e+06	1.03178e+06	557756	398570	587330	1.1617e+06	998119	1.4827e+06	607309	81910.9	642060	263730	390692	135040	728522
C1232	C1232_(1R,8S,9S)-3,4-dihydroxy-8-methoxy-11,11-dimethyl-5-(propan-2-yl)-16-oxatetracyclo[7.5.2.0	3.855_361.19702	POS	3.855	361.197	C21 H28 O5	(1R,8S,9S)-3,4-dihydroxy-8-methoxy-11,11-dimethyl-5-(propan-2-yl)-16-oxatetracyclo[7.5.2.0	-0.00393397313553123	-10.9218273979979	24.8231337178288	3	mzCloud	NA	NA	NA	NA	NA	NA	NA	NA	NA	1.6832e+06	2.598e+06	1.07839e+07	732739	3.13865e+06	996281	1.30798e+06	2.6741e+06	2.95175e+06	4.17411e+06	1.48474e+06	1.15377e+06	1.8112e+06	7.6722e+06	1.09884e+06	1.13289e+06	1.243e+06	1.99004e+06	3.89914e+06	817397	2.6672e+06
C3925	C3925_(1S)-1-(3-Methoxyphenyl)-2-[4-[4-[(propan-2-ylideneamino)oxymethyl]phenyl]triazol-1-yl]ethanol	HMDB0250376	NEG	3.78	379.176	C21 H24 N4 O3	(1S)-1-(3-Methoxyphenyl)-2-[4-[4-[(propan-2-ylideneamino)oxymethyl]phenyl]triazol-1-yl]ethanol	-0.00173228665431679	-4.55643273926296	NA	4	HMDB	NA	HMDB0250376	Organoheterocyclic compounds	Triazoles	Azoles	Triazoles	NA	NA	NA	3.96247e+06	3.3176e+06	3.01287e+06	3.60444e+06	2.84455e+06	1.9278e+06	3.10745e+06	1.99264e+06	2.6837e+06	3.15241e+06	574970	2.71149e+06	3.17964e+06	3.30161e+06	3.99834e+06	1.40234e+06	4.08416e+06	2.34092e+06	2.36582e+06	1.00707e+06	2.72861e+06
C3385	C3385_(1S,10S,21R)-7-Ethylidene-4,21-di(propan-2-yl)-2-oxa-12,13-dithia-5,8,20,23-tetrazabicyclo[8.7.6]tricos-16-ene-3,6,9,19,22-pentone	HMDB0242424	NEG	9.475	506.315	C28 H45 N O7	(1S,10S,21R)-7-Ethylidene-4,21-di(propan-2-yl)-2-oxa-12,13-dithia-5,8,20,23-tetrazabicyclo[8.7.6]tricos-16-ene-3,6,9,19,22-pentone	0.00222667298760371	4.38909314052033	NA	4	HMDB	NA	HMDB0242424	NA	NA	NA	NA	NA	NA	NA	78895.8	1.72678e+06	765573	2.3846e+06	2.0037e+06	248598	1.10992e+06	2.93365e+06	228456	25866.2	36929	1.84557e+06	147029	45290.5	219747	36809.9	3.23906e+06	139078	23655.4	60224.1	864972
C3386	C3386_(1S,2R,3R,4R,5R,6S,7S,8R,9R,10R,13R,14R,16S,17S,18R)-6,16,18-Trimethoxy-13-(methoxymethyl)-11-methyl-11-azahexacyclo[7.7.2.12,5.01,10.03,8.013,17]nonadecane-4,5,7,8,14-pentol	HMDB0242427	POS	5.96	486.271	C24 H39 N O9	(1S,2R,3R,4R,5R,6S,7S,8R,9R,10R,13R,14R,16S,17S,18R)-6,16,18-Trimethoxy-13-(methoxymethyl)-11-methyl-11-azahexacyclo[7.7.2.12,5.01,10.03,8.013,17]nonadecane-4,5,7,8,14-pentol	0.00084116523441935	1.73342318099243	NA	4	HMDB	NA	HMDB0242427	Lipids and lipid-like molecules	Diterpenoids	Prenol lipids	Terpenoids	NA	NA	NA	612802	1.36391e+06	1.25655e+06	1.16852e+06	700489	57568	1.42053e+06	1.24025e+06	840728	1.27575e+06	69177.4	1.42537e+06	599165	287423	467164	59522.9	1.1892e+06	120865	439155	87185.7	734066
A889	A889_(1S,2S,3aR,4S,5S,9R,11R,13aS)-4,9,11-tris(acetyloxy)-3a-hydroxy-2,5,8,8,12-pentamethyl-1H,2H,3H,3aH,4H,5H,8H,9H,10H,11H,13aH-cyclopenta[12]annulen-1-yl benzoate	0.913_567.29663	POS	0.913	567.297	C33 H44 O9	(1S,2S,3aR,4S,5S,9R,11R,13aS)-4,9,11-tris(acetyloxy)-3a-hydroxy-2,5,8,8,12-pentamethyl-1H,2H,3H,3aH,4H,5H,8H,9H,10H,11H,13aH-cyclopenta[12]annulen-1-yl benzoate	-18.0091842173312	-30821.8884848052	46.9997158519325	3	mzCloud	NA	NA	NA	NA	NA	NA	NA	NA	NA	2.93869e+06	1.55876e+07	2.11597e+07	3.2905e+06	2.06441e+06	4.75525e+06	2.78613e+07	2.85668e+07	8.95268e+06	3.32487e+06	5.48006e+06	1.765e+07	1.43617e+07	3.70603e+06	2.03109e+07	1.20072e+06	1.46547e+07	2.87924e+07	1.75082e+07	3.50307e+06	1.22835e+07
C350	C350_(1S,2S,4R,7E,11S)-4,8-dimethyl-12-methylidene-3,14-dioxatricyclo[9.3.0.0	5.44_249.14868	POS	5.44	249.149	C15 H20 O3	(1S,2S,4R,7E,11S)-4,8-dimethyl-12-methylidene-3,14-dioxatricyclo[9.3.0.0	0.00015413955705412	0.621176690827148	87.0956093640309	2	mzCloud	NA	NA	NA	NA	NA	NA	NA	NA	NA	5.38979e+06	4.42651e+06	3.34588e+06	4.10892e+06	4.44765e+06	1.59639e+06	3.61515e+06	2.57328e+06	9.40995e+06	3.20803e+06	628240	3.06741e+06	2.7498e+06	3.70526e+06	5.11019e+06	2.97575e+06	3.78661e+06	2.15671e+06	5.12428e+06	1.18726e+06	3.63065e+06
A4302	A4302_(1S,2S,6R,15S,16R)-5-(Cyclopropylmethyl)-16-(2-hydroxy-3,3-dimethylbutan-2-yl)-15-methoxy-13-oxa-5-azahexacyclo[13.2.2.12,8.01,6.02,14.012,20]icosa-8(20),9,11-trien-11-ol	HMDB0260098	NEG	1.608	466.296	C29 H41 N O4	(1S,2S,6R,15S,16R)-5-(Cyclopropylmethyl)-16-(2-hydroxy-3,3-dimethylbutan-2-yl)-15-methoxy-13-oxa-5-azahexacyclo[13.2.2.12,8.01,6.02,14.012,20]icosa-8(20),9,11-trien-11-ol	0.0001965194583704	0.42053918644776	NA	4	HMDB	NA	HMDB0260098	Benzenoids	NA	Phenanthrenes and derivatives	Benzene and derivatives	NA	NA	NA	343816	375020	256599	417444	197082	227329	212982	163770	385286	309961	2.34796e+07	174848	216344	102311	528142	8.80935e+06	155760	259008	390153	3.2338e+07	3.46714e+06
C4807	C4807_(1S,3R,5Z)-5-[(2E)-2-[(1R,3As,7aR)-1-[(2R,4S)-4,6-dihydroxy-6-methylheptan-2-yl]-7a-methyl-2,3,3a,5,6,7-hexahydro-1H-inden-4-ylidene]ethylidene]-4-methylidenecyclohexane-1,3-diol	HMDB0260101	POS	10.319	433.331	C27 H44 O4	(1S,3R,5Z)-5-[(2E)-2-[(1R,3As,7aR)-1-[(2R,4S)-4,6-dihydroxy-6-methylheptan-2-yl]-7a-methyl-2,3,3a,5,6,7-hexahydro-1H-inden-4-ylidene]ethylidene]-4-methylidenecyclohexane-1,3-diol	1.44296876669614e-06	0.00333770251278855	NA	4	HMDB	NA	HMDB0260101	Lipids and lipid-like molecules	Vitamin D and derivatives	Steroids and steroid derivatives	Vitamins and derivatives	NA	NA	NA	215937	195905	152912	140045	255330	1.40784e+06	152437	271611	232411	254772	2.42544e+06	248364	197266	285604	174770	5.3322e+06	172190	241201	181487	6.62198e+06	957985
C1474	C1474_(1S,3aS,4R,6aR)-1,4-bis(2H-1,3-benzodioxol-5-yl)-hexahydrofuro[3,4-c]furan-3a-ol	5.467_353.09947	POS	5.467	353.099	C20 H18 O7	(1S,3aS,4R,6aR)-1,4-bis(2H-1,3-benzodioxol-5-yl)-hexahydrofuro[3,4-c]furan-3a-ol	-18.0130600806961	-48670.1011329614	52.9305255301945	3	mzCloud	NA	NA	NA	NA	NA	NA	NA	NA	NA	1.47925e+07	1.88418e+07	9.19746e+06	1.38201e+07	1.987e+07	7.50742e+06	1.1903e+07	1.35838e+07	1.08114e+07	1.21882e+07	3.7041e+06	1.282e+07	1.09857e+07	7.76957e+06	1.49081e+07	5.57026e+06	1.5341e+07	6.87716e+06	9.88974e+06	5.14563e+06	1.12763e+07
A762	A762_(1S,4R,4aS,8aS)-1,2-Bis(hydroxymethyl)-5,5,8a-trimethyl-1,4,4a,5,6,7,8,8a-octahydro-1,4-naphthalenediol	Reference7776	NEG	1.934	269.176	C15 H26 O4	(1S,4R,4aS,8aS)-1,2-Bis(hydroxymethyl)-5,5,8a-trimethyl-1,4,4a,5,6,7,8,8a-octahydro-1,4-naphthalenediol	4.51176737215064e-05	0.166989246139174	69.6381683507205	2	mzCloud	NA	NA	NA	NA	NA	NA	NA	NA	NA	2.50557e+07	1.21536e+07	1.41697e+07	2.01167e+07	2.30892e+07	8.79081e+06	1.79424e+07	5.93377e+06	2.14742e+07	2.3879e+07	4.91339e+06	3.3744e+07	3.94781e+07	4.80081e+06	1.54513e+07	5.77864e+06	6.73594e+06	1.83173e+07	1.68903e+07	1.66108e+07	1.67663e+07
A906	A906_(1S,4S,5R,9S,10R,13R,14R)-14-hydroxy-5,9-dimethyl-14-{[(3-methylbutanoyl)oxy]methyl}tetracyclo[11.2.1.0	0.97_419.28378	NEG	0.97	419.284	C25 H40 O5	(1S,4S,5R,9S,10R,13R,14R)-14-hydroxy-5,9-dimethyl-14-{[(3-methylbutanoyl)oxy]methyl}tetracyclo[11.2.1.0	0.00348538898435891	8.29286707082216	45.9537741353106	3	mzCloud	NA	NA	NA	NA	NA	NA	NA	NA	NA	2.43086e+06	1.02267e+06	2.09116e+06	2.80364e+06	2.38155e+06	1.47241e+07	2.19449e+06	1.74844e+06	2.13885e+06	2.69917e+06	2.65953e+07	2.15543e+06	2.82617e+06	1.85354e+06	1.89545e+06	2.54824e+07	1.61291e+06	2.07439e+06	2.71617e+06	3.07924e+07	6.61195e+06
C926	C926_(1S,4aR,5S)-5-[(3E)-5-Methoxy-3-methyl-5-oxo-3-penten-1-yl]-1,4a-dimethyl-6-methylenedecahydro-1-naphthalenecarboxylic acid	Reference7868	NEG	8.445	347.222	C21 H32 O4	(1S,4aR,5S)-5-[(3E)-5-Methoxy-3-methyl-5-oxo-3-penten-1-yl]-1,4a-dimethyl-6-methylenedecahydro-1-naphthalenecarboxylic acid	-0.00037062062500581	-1.06429819897502	66.3097638323213	2	mzCloud	NA	NA	NA	NA	NA	NA	NA	NA	NA	826754	666346	784620	573397	412998	179232	665807	1.13791e+06	1.10233e+06	154291	272131	924770	791926	1.85177e+06	498228	545261	1.0731e+06	620203	473670	647126	710093
C393	C393_(1S,5R,9R,13R)-1,5,9-trimethyl-11,14,15,16-tetraoxatetracyclo[10.3.1.0⁴,	6.147_321.10980	POS	6.147	321.11	C15 H22 O5	(1S,5R,9R,13R)-1,5,9-trimethyl-11,14,15,16-tetraoxatetracyclo[10.3.1.0⁴,	37.9558019560938	134525.049462677	63.1343376312801	2	mzCloud	NA	NA	NA	NA	NA	NA	NA	NA	NA	8.9756e+06	6.29718e+06	5.92659e+06	5.04946e+06	5.43292e+06	2.9832e+06	6.45423e+06	6.19546e+06	5.54428e+06	2.95289e+06	3.64212e+06	4.44605e+06	6.7695e+06	1.19119e+06	7.67261e+06	7.06338e+06	4.30802e+06	5.16446e+06	5.58638e+06	6.68289e+06	5.41692e+06
A208	A208_(1S,6R,11aR,13R,14aS)-1,13-dihydroxy-6-methyl-1H,4H,6H,7H,8H,9H,11aH,12H,13H,14H,14aH-cyclopenta[f]oxacyclotridecan-4-one	11.673_303.15490	POS	11.673	303.155	C16 H24 O4	(1S,6R,11aR,13R,14aS)-1,13-dihydroxy-6-methyl-1H,4H,6H,7H,8H,9H,11aH,12H,13H,14H,14aH-cyclopenta[f]oxacyclotridecan-4-one	21.9801630173186	78453.6615578334	78.2262675873258	2	mzCloud	NA	NA	NA	NA	NA	NA	NA	NA	NA	2.31523e+06	1.68802e+06	10413.1	1.22272e+06	1.69924e+06	216704	11133.4	1.36562e+06	312712	1.84226e+06	42568.1	1.70477e+06	666437	1.64587e+06	147046	32302.6	2.77388e+06	12507.7	9840.86	40011.7	887964
A791	A791_(1S,7S,8S,9R,10S,11S,13S,16S)-6,9,12,17-Tetrahydroxy-16-methyl-8-(2-methyl-2-propanyl)-2,4,14,19-tetraoxahexacyclo[8.7.2.01,11 03,7 07,11 013,17]nonadecane-5,15,18-trione	0.574_439.12547	NEG	0.574	439.125	C20 H24 O11	(1S,7S,8S,9R,10S,11S,13S,16S)-6,9,12,17-Tetrahydroxy-16-methyl-8-(2-methyl-2-propanyl)-2,4,14,19-tetraoxahexacyclo[8.7.2.01,11 03,7 07,11 013,17]nonadecane-5,15,18-trione	0.00088935237829446	2.02064984713264	35.1248890659452	3	mzCloud	NA	NA	NA	NA	NA	NA	NA	NA	NA	533636	2.57926e+06	1.66161e+06	2.62724e+06	2.35991e+06	8.64667e+06	1.02479e+06	1.24583e+06	6.63097e+06	4.46085e+06	1.75634e+07	751781	3.16941e+06	486932	3.11855e+06	6.93676e+06	82480.5	747134	639021	2.37454e+07	4.45058e+06
C1170	C1170_(1S,8S,9S,10S,13R)-6,9,10-trimethyl-2-oxo-4,14-dioxatetracyclo[7.5.0.0	3.537_327.11888	POS	3.537	327.119	C17 H20 O5	(1S,8S,9S,10S,13R)-6,9,10-trimethyl-2-oxo-4,14-dioxatetracyclo[7.5.0.0	21.9805334436584	72273.2247759979	19.8293018656357	3	mzCloud	NA	NA	NA	NA	NA	NA	NA	NA	NA	6.19963e+06	5.08191e+06	173795	5.52928e+06	4.32424e+06	862796	5.0329e+06	3.04043e+06	4.1127e+06	5.19694e+06	1.14181e+06	3.96102e+06	4.33444e+06	812550	3.98025e+06	914338	5.25767e+06	1.28637e+06	3.26374e+06	153804	3.23303e+06
A1672	A1672_(1aS,3S,4R,5S,5aS,8aR,10R,10aS)-3-Hydroxy-3,10-dimethyl-6-methylene-2,7-dioxododecahydrooxireno[7,8]cyclodeca[1,2-b]furan-4,5-diyl bis(2-methylacrylate)	Reference7422	NEG	1.672	447.166	C23 H28 O9	(1aS,3S,4R,5S,5aS,8aR,10R,10aS)-3-Hydroxy-3,10-dimethyl-6-methylene-2,7-dioxododecahydrooxireno[7,8]cyclodeca[1,2-b]furan-4,5-diyl bis(2-methylacrylate)	0.00043454379294871	0.969588687432243	23.7106340158593	3	mzCloud	NA	NA	NA	NA	NA	NA	NA	NA	NA	1.61775e+07	3.49016e+07	315269	1.60514e+07	222524	441215	3.76986e+06	7.59648e+06	6.23806e+06	2.60099e+06	261559	1.48098e+06	853023	2.48419e+06	1.65495e+07	314075	8.42957e+06	5.8215e+06	9.8757e+06	301701	6.73433e+06
C3380	C3380_(1r,3r)-1-Aminocyclopentane-1,3-dicarboxylic acid	HMDB0242328	POS	1.322	174.076	C7 H11 N O4	(1r,3r)-1-Aminocyclopentane-1,3-dicarboxylic acid	0.00017119183442559	0.989154756833311	NA	4	HMDB	NA	HMDB0242328	Organic acids and derivatives	Amino acids, peptides, and analogues	Carboxylic acids and derivatives	Amino acids, peptides, and analogues	NA	NA	NA	2.16649e+07	2.40855e+07	1.95681e+07	2.58738e+07	1.70212e+07	3.50293e+07	2.68934e+07	3.95041e+07	1.50198e+07	1.40904e+07	9.9448e+06	1.58127e+07	1.33434e+07	3.42926e+07	1.89403e+07	1.16564e+07	1.79683e+07	1.62295e+07	4.90601e+07	1.05463e+07	2.18272e+07
C3391	C3391_(2,5-Dioxopyrrolidin-1-yl) 5-(2-hydroxyethoxy)-4-oxopentanoate	HMDB0242493	POS	0.713	274.092	C11 H15 N O7	(2,5-Dioxopyrrolidin-1-yl) 5-(2-hydroxyethoxy)-4-oxopentanoate	7.83266012831518e-05	0.286821479880324	NA	4	HMDB	NA	HMDB0242493	Organic acids and derivatives	Gamma-keto acids and derivatives	Keto acids and derivatives	Organic acids	NA	NA	NA	5.8546e+06	4.19613e+06	3.92168e+06	4.14538e+06	5.13353e+06	3.1073e+07	4.71626e+06	3.90052e+06	4.18846e+06	3.13474e+06	4.51666e+07	9.72013e+06	6.31263e+06	9.94192e+06	5.42413e+06	3.659e+07	8.12907e+06	6.98614e+06	5.77871e+06	8.44736e+07	1.44394e+07
A1315	A1315_(2,6-dimethylmorpholino)(1-methyl-5-nitro-1H-pyrazol-4-yl)methanone	6.992_251.11453	POS	6.992	251.115	C11 H16 N4 O4	(2,6-dimethylmorpholino)(1-methyl-5-nitro-1H-pyrazol-4-yl)methanone	-18.0098990392968	-67171.7520177232	23.5199219254029	3	mzCloud	NA	NA	NA	NA	NA	NA	NA	NA	NA	26233.5	24454.6	27284.7	33101.4	27516.6	59809.1	48352.9	50849.4	31770	28016.1	55305.5	66883	33389	1.3881e+06	26128.9	40347.8	33528.6	38452.8	21337.6	97580.2	107922
C1346	C1346_(2,6-dimethylpiperidino)(3,4,5-trimethoxyphenyl)methanone	4.476_308.18578	POS	4.476	308.186	C17 H25 N O4	(2,6-dimethylpiperidino)(3,4,5-trimethoxyphenyl)methanone	0.00014542902692937	0.473435133273167	45.9299766254323	3	mzCloud	NA	NA	NA	NA	NA	NA	NA	NA	NA	3.11178e+06	2.71038e+06	1.33756e+06	2.92034e+06	2.06738e+06	116499	2.41289e+06	1.23361e+06	1.99525e+06	1.92716e+06	346180	1.79492e+06	1.46605e+06	487035	3.13429e+06	313133	3.0407e+06	408371	995728	38363.6	1.59288e+06
C3387	C3387_(2-((3,5-Di-t-butyl-4-hydroxyphenyl)thio)-1-methylpropoxy)acetic acid	HMDB0242455	POS	9.803	369.21	C20 H32 O4 S	(2-((3,5-Di-t-butyl-4-hydroxyphenyl)thio)-1-methylpropoxy)acetic acid	0.00014506170037975	0.393973007044032	NA	4	HMDB	NA	HMDB0242455	Benzenoids	Phenylpropanes	Benzene and substituted derivatives	Benzene and derivatives	NA	NA	NA	816902	550208	156212	244408	948773	2.47434e+06	546855	618880	598701	676748	2.28708e+06	1.20244e+06	626288	741643	321280	1.79207e+06	466787	815487	582337	4.33445e+06	1.04009e+06
A3131	A3131_(2-(2',6'-Dimethoxy)phenoxyethylamino)methylbenzo-1,4-dioxane	HMDB0242457	NEG	3.134	344.151	C19 H23 N O5	(2-(2',6'-Dimethoxy)phenoxyethylamino)methylbenzo-1,4-dioxane	0.00045776421410437	1.32624686233718	NA	4	HMDB	NA	HMDB0242457	Benzenoids	Methoxybenzenes	Benzene and substituted derivatives	Benzene and derivatives	NA	NA	NA	5.08832e+06	5.40126e+06	567689	4.49291e+06	2.24109e+06	133649	2.36987e+06	1.12226e+06	5.76452e+06	2.74563e+06	592274	1.66747e+06	5.19413e+06	405318	1.0782e+07	817949	2.47384e+06	698732	838608	247929	2.68227e+06
C3388	C3388_(2-Acetyloxy-3-octadecoxypropyl) 2-(trimethylazaniumyl)ethyl phosphate	HMDB0242460	POS	10.057	552.403	C28 H58 N O7 P	(2-Acetyloxy-3-octadecoxypropyl) 2-(trimethylazaniumyl)ethyl phosphate	0.00069517831468601	1.2607626146835	NA	4	HMDB	NA	HMDB0242460	Lipids and lipid-like molecules	Glycerophosphocholines	Glycerophospholipids	Glycerophospholipids[GP]	NA	NA	NA	47015.4	51320.8	43965.2	41665.7	50084.8	1.18525e+06	43975.1	45111.8	51081.6	56724.5	8.89311e+06	223065	54004	41437.4	45029.6	7.07264e+06	43852.1	220590	50167.7	6.8456e+07	4.33581e+06
A3132	A3132_(2-Chlorophenyl)methyldiazene	HMDB0242466	NEG	0.654	153.023	C7 H7 Cl N2	(2-Chlorophenyl)methyldiazene	0.00036021118617668	2.33858151158486	NA	4	HMDB	NA	HMDB0242466	Benzenoids	Halobenzenes	Benzene and substituted derivatives	Benzene and derivatives	NA	NA	NA	7.52956e+06	2.57209e+07	1.15354e+08	2.39122e+07	9.47467e+06	1.19996e+07	2.38123e+07	2.57671e+08	1.65479e+07	1.67423e+07	5.79274e+07	2.03818e+06	5.165e+06	6.9389e+08	2.68988e+07	2.12361e+07	1.2542e+07	3.02246e+08	7.18725e+07	3.30893e+07	8.67835e+07
C3390	C3390_(2-Ethylcrotonoyl)urea	HMDB0242468	POS	1.291	157.097	C7 H12 N2 O2	(2-Ethylcrotonoyl)urea	-4.72564062476977e-05	-0.302751254510611	NA	4	HMDB	NA	HMDB0242468	Organic acids and derivatives	Ureas	Organic carbonic acids and derivatives	Organic acids	NA	NA	NA	7.42888e+06	6.86356e+06	8.14946e+06	8.26811e+06	4.55738e+06	6.01686e+06	9.58797e+06	9.55796e+06	8.40043e+06	5.33899e+06	5.80293e+06	8.5879e+06	1.08606e+07	1.05042e+07	1.09357e+07	6.11216e+06	8.57777e+06	8.11364e+06	9.12617e+06	5.7319e+06	7.92613e+06
A1039	A1039_(2-amino-5-chlorophenyl)(phenyl)methanone oxime	1.648_245.04879	NEG	1.648	245.049	C13 H11 Cl N2 O	(2-amino-5-chlorophenyl)(phenyl)methanone oxime	7.1593653757418e-05	0.290964888008254	18.8188997822124	3	mzCloud	NA	NA	NA	NA	NA	NA	NA	NA	NA	1.02225e+06	1.02067e+06	188332	1.84863e+06	243852	263569	304274	487258	3.82051e+06	362112	3.97782e+06	1.25084e+06	3.98163e+06	2.18185e+06	9.53088e+06	1.48659e+07	1.46341e+06	1.87264e+06	386787	1.75737e+07	3.33235e+06
A311	A311_(2-butyl-1H-imidazol-4-yl)methanol	4.126_155.11814	POS	4.126	155.118	C8 H14 N2 O	(2-butyl-1H-imidazol-4-yl)methanol	0.00024773698163471	1.60752706630637	77.2596813385338	2	mzCloud	NA	NA	NA	NA	NA	NA	NA	NA	NA	4.99166e+06	6.2587e+06	1.59082e+07	4.26274e+06	5.77344e+06	4.02416e+06	1.62114e+07	8.55654e+06	7.32676e+06	1.64364e+07	3.07793e+07	2.60239e+07	1.17813e+07	4.2579e+06	6.4106e+06	2.49269e+07	1.70219e+07	2.1231e+07	1.01947e+07	1.25419e+07	1.2746e+07
C1247	C1247_(2-morpholino-5-nitrophenyl)methanol	3.954_239.10322	POS	3.954	239.103	C11 H14 N2 O4	(2-morpholino-5-nitrophenyl)methanol	0.0005436917492716	2.28350420828506	14.025882015781	3	mzCloud	NA	NA	NA	NA	NA	NA	NA	NA	NA	8.70385e+06	6.91388e+06	6.58819e+06	9.35692e+06	6.81108e+06	4.07337e+06	6.01441e+06	6.03262e+06	5.81533e+06	7.74684e+06	3.2916e+06	6.56191e+06	9.66571e+06	6.70961e+06	1.07117e+07	3.89651e+06	7.82785e+06	5.76478e+06	5.34438e+06	3.53153e+06	6.5681e+06
A2158	A2158_(22E)-(25R)-26,26,26-trifluoro-1alpha,25-dihydroxy-22,23-didehydrovitamin D3 / (22E)-(25R)-26,26,26-trifluoro-1alpha,25-dihydroxy-22,23-didehydrocholecalciferol	1.962_469.29236	POS	1.962	469.292	C27 H39 F3 O3	(22E)-(25R)-26,26,26-trifluoro-1alpha,25-dihydroxy-22,23-didehydrovitamin D3 / (22E)-(25R)-26,26,26-trifluoro-1alpha,25-dihydroxy-22,23-didehydrocholecalciferol	-4.78015624594264e-05	-0.102077899640588	NA	4	NA	NA	NA	NA	NA	NA	NA	NA	NA	NA	223693	293088	1.2352e+07	187529	1.32389e+07	253793	1.10193e+07	726683	1.26156e+06	3.10491e+06	452424	5.10727e+06	920433	1.64264e+06	308938	829754	204931	252583	5.98855e+06	471516	2.94202e+06
C2362	C2362_(22S)-1alpha,22,25-trihydroxy-23,24-tetradehydro-24a,24b-dihomo-20-epivitamin D3 / (22S)-1alpha,22,25-trihydroxy-23,24-tetradehydro-24a,24b-dihomo-20-epicholecalciferol	8.265_457.33146	POS	8.265	457.331	C29 H44 O4	(22S)-1alpha,22,25-trihydroxy-23,24-tetradehydro-24a,24b-dihomo-20-epivitamin D3 / (22S)-1alpha,22,25-trihydroxy-23,24-tetradehydro-24a,24b-dihomo-20-epicholecalciferol	0.00026547995611281	0.581779567909849	NA	4	NA	NA	NA	NA	NA	NA	NA	NA	NA	NA	1.42036e+07	1.14308e+07	1.49955e+07	1.02803e+07	5.27195e+06	1.94543e+06	1.22604e+07	1.13819e+07	8.74521e+06	5.18171e+06	1.66994e+06	5.59067e+06	7.45276e+06	9.4201e+06	1.32172e+07	2.21552e+06	1.95441e+07	6.41677e+06	8.13632e+06	955222	8.51576e+06
C2330	C2330_(25S)-26,26,26-trifluoro-1alpha,25-dihydroxyvitamin D3 / (25S)-26,26,26-trifluoro-1alpha,25-dihydroxycholecalciferol	7.473_471.30783	POS	7.473	471.308	C27 H41 F3 O3	(25S)-26,26,26-trifluoro-1alpha,25-dihydroxyvitamin D3 / (25S)-26,26,26-trifluoro-1alpha,25-dihydroxycholecalciferol	-0.00022627134859476	-0.481120504994227	NA	4	NA	NA	NA	NA	NA	NA	NA	NA	NA	NA	259643	152832	3.49733e+06	175785	157000	468692	401028	551435	275067	163873	187336	131380	1.09463e+06	2.99466e+06	146622	342234	3.09471e+06	766902	1.40328e+06	628014	844622
C361	C361_(2E)-1-(2,4-dihydroxyphenyl)-3-(4-hydroxyphenyl)prop-2-en-1-one	5.572_257.08091	POS	5.572	257.081	C15 H12 O4	(2E)-1-(2,4-dihydroxyphenyl)-3-(4-hydroxyphenyl)prop-2-en-1-one	7.52069352643048e-05	0.293692701536557	84.3700686536567	2	mzCloud	NA	NA	NA	NA	NA	NA	NA	NA	NA	1.2814e+07	5.76649e+06	2.66876e+06	7.89951e+06	2.41686e+07	2.2243e+06	4.9143e+06	4.13789e+06	7.94366e+06	1.72923e+06	1.33327e+06	4.37837e+06	1.73574e+06	1.23488e+06	2.6916e+07	3.24787e+06	1.09758e+06	8.38151e+06	3.75059e+07	3.96416e+07	9.98698e+06
A1288	A1288_(2E)-1-(2-hydroxy-3,4,5,6-tetramethoxyphenyl)-3-phenylprop-2-en-1-one	4.566_345.13046	POS	4.566	345.13	C19 H20 O6	(2E)-1-(2-hydroxy-3,4,5,6-tetramethoxyphenyl)-3-phenylprop-2-en-1-one	-0.00281211617283361	-8.17176345077216	57.4688349882749	3	mzCloud	NA	NA	NA	NA	NA	NA	NA	NA	NA	906104	1.10879e+06	748374	923746	174394	166787	363090	92481.6	631036	840838	193194	144947	97678.6	6.80892e+07	264286	299087	241049	145835	268630	542451	3.8121e+06
A3008	A3008_(2E)-2-Heptenal	HMDB0033827	NEG	2.731	111.082	C7 H12 O	(2E)-2-Heptenal	0.00027929695312423	2.49174686362685	NA	4	HMDB	NA	HMDB0033827	Organic oxygen compounds	Carbonyl compounds	Organooxygen compounds	Carbonyl compounds	NA	NA	NA	2.89685e+06	1.01198e+07	4.03456e+07	2.81295e+06	4.93366e+06	5.25907e+07	9.50158e+06	4.42463e+06	2.04684e+07	2.1652e+07	5.75269e+07	1.15379e+07	3.28158e+06	4.63477e+06	5.88965e+06	4.43377e+07	1.08801e+07	3.4634e+07	6.71198e+07	5.30888e+06	2.07449e+07
A84	A84_(2E)-2-[2-(1,2,4a,5-tetramethyl-1,2,3,4,4a,7,8,8a-octahydronaphthalen-1-yl)ethyl]but-2-enedioic acid	0.796_352.24796	POS	0.796	352.248	C20 H30 O4	(2E)-2-[2-(1,2,4a,5-tetramethyl-1,2,3,4,4a,7,8,8a-octahydronaphthalen-1-yl)ethyl]but-2-enedioic acid	17.0262789306971	50944.1797149261	74.6600275336405	2	mzCloud	NA	NA	NA	NA	NA	NA	NA	NA	NA	824895	1.03081e+06	341338	1.00234e+06	834820	1.44398e+06	607318	462548	1.61104e+06	248370	687314	718620	573849	1.44698e+06	3.77857e+06	587290	1.65973e+06	231607	688216	1.5652e+06	1.01724e+06
C154	C154_(2E)-3-(2-{[(2S,3R,4S,5S,6R)-3,4,5-trihydroxy-6-(hydroxymethyl)oxan-2-yl]oxy}phenyl)prop-2-enoic acid	1.412_344.13323	POS	1.412	344.133	C15 H18 O8	(2E)-3-(2-{[(2S,3R,4S,5S,6R)-3,4,5-trihydroxy-6-(hydroxymethyl)oxan-2-yl]oxy}phenyl)prop-2-enoic acid	17.0257925028644	52210.3151364314	68.9651278027574	2	mzCloud	NA	NA	NA	NA	NA	NA	NA	NA	NA	4.93845e+06	2.64697e+06	1.23565e+06	599896	498962	2.56315e+07	622164	8.52379e+06	529710	508037	9.00838e+07	5.86101e+06	581482	1.1251e+08	3.52917e+06	6.3536e+07	3.90808e+06	3.96763e+06	5.94959e+06	1.07633e+08	2.21647e+07
C1586	C1586_(2E)-3-(4-methoxyphenyl)-1-[2,4,6-trimethoxy-3-(3-methylbut-2-en-1-yl)phenyl]prop-2-en-1-one	7.876_397.19998	POS	7.876	397.2	C24 H28 O5	(2E)-3-(4-methoxyphenyl)-1-[2,4,6-trimethoxy-3-(3-methylbut-2-en-1-yl)phenyl]prop-2-en-1-one	-0.00096878054682747	-2.44521962563872	38.9036248067272	3	mzCloud	NA	NA	NA	NA	NA	NA	NA	NA	NA	260522	1.86496e+06	1.60959e+06	129102	1.79352e+06	1.11793e+06	1.24e+06	2.29918e+06	1.95465e+06	1.83669e+06	4.52424e+06	2.11129e+06	2.37774e+06	866982	1.70111e+06	3.21563e+06	624604	1.34001e+06	775577	5.53884e+06	1.85911e+06
A254	A254_(2E)-3-phenyl-N-(2-phenylethyl)prop-2-enamide	2.398_274.11862	POS	2.398	274.119	C17 H17 N O	(2E)-3-phenyl-N-(2-phenylethyl)prop-2-enamide	21.9803310861719	87525.3547000934	82.6176462835929	2	mzCloud	NA	NA	NA	NA	NA	NA	NA	NA	NA	1.7725e+06	1.70498e+06	1.15015e+06	1.34396e+06	1.28183e+06	182409	1.67921e+06	1.13623e+06	1.00154e+06	1.33488e+06	153094	936679	973849	426263	1.24457e+06	120761	2.46892e+06	587223	1.05554e+06	165012	1.03598e+06
A1255	A1255_(2E)-4-Hydroxy-3,7-dimethyl-2,6-octadien-1-yl beta-D-glucopyranoside	3.701_377.18221	NEG	3.701	377.182	C16 H28 O7	(2E)-4-Hydroxy-3,7-dimethyl-2,6-octadien-1-yl beta-D-glucopyranoside	46.0059859740071	138495.6975677	29.5745175520172	3	mzCloud	NA	NA	NA	NA	NA	NA	NA	NA	NA	7.80242e+06	7.28897e+06	75166.8	9.7011e+06	9.80846e+06	994184	6.31743e+06	4.59811e+06	2.50821e+06	4.62034e+06	1.03492e+06	4.21748e+06	3.44987e+06	3.36575e+06	1.84132e+06	776459	4.01804e+06	3.65959e+06	6.04642e+06	1.06451e+06	4.15944e+06
A3140	A3140_(2E)-4-Hydroxy-3-methylbut-2-en-1-yl trihydrogen diphosphate	HMDB0242600	NEG	0.631	260.993	C5 H12 O8 P2	(2E)-4-Hydroxy-3-methylbut-2-en-1-yl trihydrogen diphosphate	-0.00033733907969235	-1.28755010190562	NA	4	HMDB	NA	HMDB0242600	Lipids and lipid-like molecules	Isoprenoid phosphates	Prenol lipids	Prenol lipids[PR]	NA	NA	NA	114712	278457	1.04972e+06	2.0725e+06	2.53552e+06	123076	585980	1.29986e+06	770476	85807.7	114331	51672.5	278018	969268	599774	77888.7	481185	399840	494054	76376.6	622926
A275	A275_(2E)-6-hydroxy-2-methyl-6-(4-methylphenyl)hept-2-enoic acid	3.173_271.12912	POS	3.173	271.129	C15 H20 O3	(2E)-6-hydroxy-2-methyl-6-(4-methylphenyl)hept-2-enoic acid	21.9805988430469	88580.9970696145	77.7475782658615	2	mzCloud	NA	NA	NA	NA	NA	NA	NA	NA	NA	8.55759e+06	3.52066e+06	5.91585e+06	3.32703e+06	2.1894e+06	842068	3.04382e+06	6.17176e+06	1.28633e+06	8.71511e+06	864010	5.7318e+06	6.34779e+06	3.37493e+06	1.14503e+06	583848	1.015e+07	4.27359e+06	6.88611e+06	506810	4.17168e+06
A213	A213_(2E)-N-(4-acetamidobutyl)-3-(4-hydroxy-3-methoxyphenyl)prop-2-enamide	11.945_329.14401	POS	11.945	329.144	C16 H22 N2 O4	(2E)-N-(4-acetamidobutyl)-3-(4-hydroxy-3-methoxyphenyl)prop-2-enamide	21.9787787611719	71789.0169252225	66.8839790766554	2	mzCloud	NA	NA	NA	NA	NA	NA	NA	NA	NA	8874.66	11750.4	123903	9125.15	442195	45678.9	7949.72	239182	11900.5	22235.9	30950.9	191607	21229	1.75593e+06	17710.8	23047.7	164231	7556.31	6994.88	27022.6	158454
C3399	C3399_(2E,4E)-5-[2-Methyl-2-(1,1,4,4-tetramethyl-1,2,3,4-tetrahydronaphthalene-6-yl)cyclopropyl]-3-methyl-2,4-pentadienoic acid	HMDB0242660	POS	7.671	353.248	C24 H32 O2	(2E,4E)-5-[2-Methyl-2-(1,1,4,4-tetramethyl-1,2,3,4-tetrahydronaphthalene-6-yl)cyclopropyl]-3-methyl-2,4-pentadienoic acid	2.12861719433022e-05	0.0604308370274266	NA	4	HMDB	NA	HMDB0242660	Benzenoids	NA	Tetralins	Benzene and derivatives	NA	NA	NA	644661	101468	65368.6	699978	135119	95076.8	567932	163218	315534	293179	2.9904e+06	180517	81694.7	269344	448823	155545	150366	110030	157197	529052	407725
C417	C417_(2E,4E)-N-(1,3-dihydroxy-3-methylpentan-2-yl)-2-methylhexa-2,4-dienamide	6.453_224.16487	POS	6.453	224.165	C13 H23 N O3	(2E,4E)-N-(1,3-dihydroxy-3-methylpentan-2-yl)-2-methylhexa-2,4-dienamide	-18.010205076814	-74679.1468967882	65.629831084178	2	mzCloud	NA	NA	NA	NA	NA	NA	NA	NA	NA	1.86558e+06	862469	445473	413094	1.76032e+06	3.83104e+06	722520	473258	840520	596683	1.15153e+06	1.68323e+06	711382	315425	802943	2.44244e+06	509392	593493	659893	7.35095e+06	1.40158e+06
A201	A201_(2E,4E)-N-(2-methylpropyl)deca-2,4-dienamide	1.978_224.20117	POS	1.978	224.201	C14 H25 N O	(2E,4E)-N-(2-methylpropyl)deca-2,4-dienamide	0.00028089500003147	1.25852614936821	66.631431257201	2	mzCloud	NA	NA	NA	NA	NA	NA	NA	NA	NA	31418.5	24031.6	20363.2	29156.1	60840.5	1.55715e+07	38799.5	23684.8	115046	27561.3	6.64811e+06	309244	30841.9	29215.8	49115.3	1.11971e+06	23787.5	21123.2	366289	4.98854e+06	1.47642e+06
C4879	C4879_(2E,4E)-N-[2-(4-hydroxyphenyl)ethyl]dodeca-2,4-dienamide	PB00805	POS	5.954	333.254	C20 H29 N O2	(2E,4E)-N-[2-(4-hydroxyphenyl)ethyl]dodeca-2,4-dienamide	17.026770032422	54015.5423681829	4.72694141104437	4	Public	NA	NA	NA	NA	NA	NA	NA	NA	NA	245743	63045.7	36958.9	37324.1	273982	6.14778e+06	68380	38408.1	73265.5	36907.6	1.68701e+06	570836	60085.1	42809.4	41600.8	1.23988e+06	45368.2	75866.7	62341.2	2.24615e+06	654687
A78	A78_(2E,4E,14E)-13-Hydroperoxy-N-(2-methylpropyl)icosa-2,4,14-trienamide	0.78_394.33149	POS	0.78	394.331	C24 H43 N O3	(2E,4E,14E)-13-Hydroperoxy-N-(2-methylpropyl)icosa-2,4,14-trienamide	-5.65437284194559e-05	-0.143758545477787	60.0654701732623	2	mzCloud	NA	NA	NA	NA	NA	NA	NA	NA	NA	5.01609e+06	2.51428e+06	771322	2.44115e+06	3.81268e+06	2.91732e+07	2.59747e+06	3.74856e+06	4.90274e+06	2.71962e+06	2.15727e+08	8.57577e+06	3.56286e+06	1.05875e+06	7.12018e+06	6.74622e+07	1.41851e+06	2.10692e+06	7.39862e+06	2.82614e+08	3.27371e+07
C4902	C4902_(2E,4E,8E)-7,13-dihydroxy-4,8,12-trimethyltetradeca-2,4,8-trienoic acid	PB01500	POS	3.719	319.186	C17 H28 O4	(2E,4E,8E)-7,13-dihydroxy-4,8,12-trimethyltetradeca-2,4,8-trienoic acid	21.9803654971875	74208.1619571456	44.4985232558194	4	Public	NA	NA	NA	NA	NA	NA	NA	NA	NA	507628	459673	462230	1.02323e+06	746575	907917	455937	178388	738789	753141	7.44524e+06	342892	591693	201383	977441	740940	201679	378208	815690	647155	928792
A193	A193_(2E,4E,9Z)-1-(piperidin-1-yl)hexadeca-2,4,9-trien-1-one	1.797_318.27903	POS	1.797	318.279	C21 H35 N O	(2E,4E,9Z)-1-(piperidin-1-yl)hexadeca-2,4,9-trien-1-one	-0.00010947820527462	-0.345061184027138	73.7168167429897	2	mzCloud	NA	NA	NA	NA	NA	NA	NA	NA	NA	361351	1.01655e+06	1.2024e+06	2.44692e+06	814804	126819	1.42041e+06	3.79104e+06	2.23344e+06	952665	2.98713e+06	734965	2.80125e+06	2.64356e+06	5.40783e+06	551408	3.38391e+06	1.92223e+06	5.64905e+06	1.84307e+06	2.11454e+06
A413	A413_(2R)-2,3-Dihydroxypropanoic acid	HMDB0000139	NEG	9.142	105.02	C3 H6 O4	(2R)-2,3-Dihydroxypropanoic acid	0.00026642808248311	2.51284169182955	90.3866789368877	2	mzCloud	C00258	HMDB0000139	Organic oxygen compounds	Carbohydrates and carbohydrate conjugates	Organooxygen compounds	Carbohydrates	Carbohydrate metabolism	Pentose phosphate pathway	map00030 Pentose phosphate pathway; map00260 Glycine, serine and threonine metabolism; map00561 Glycerolipid metabolism; map00630 Glyoxylate and dicarboxylate metabolism; map01100 Metabolic pathways; map01200 Carbon metabolism;	3.10285e+07	2.94891e+07	1.65121e+07	1.23161e+07	2.02695e+07	1.15297e+08	1.6991e+07	1.92468e+07	4.59023e+07	1.58054e+07	1.44817e+08	2.2395e+07	2.62864e+07	1.25321e+07	3.15563e+07	9.03332e+07	1.8832e+07	2.53093e+07	1.80846e+07	9.73905e+07	4.05197e+07
C3393	C3393_(2R)-2,8-Dimethyl-2-(4,8,12-trimethyltrideca-3,7,11-trienyl)-3,4-dihydrochromen-6-ol	HMDB0242544	POS	7.686	397.31	C27 H40 O2	(2R)-2,8-Dimethyl-2-(4,8,12-trimethyltrideca-3,7,11-trienyl)-3,4-dihydrochromen-6-ol	-0.00038412960935829	-0.969283032802424	NA	4	HMDB	NA	HMDB0242544	Lipids and lipid-like molecules	Quinone and hydroquinone lipids	Prenol lipids	Quinone	NA	NA	NA	93130.3	90805.9	342681	126887	86645.7	125623	76955.6	255629	90456.4	102758	179683	78351.8	97430.5	1.41439e+06	94976.9	125268	79168	1.10193e+06	293571	1.71926e+06	328780
C812	C812_(2R)-2-[(2R,5S)-5-[(2S)-2-hydroxybutyl]oxolan-2-yl]propanoic acid	PB00416	POS	6.341	217.144	C11 H20 O4	(2R)-2-[(2R,5S)-5-[(2S)-2-hydroxybutyl]oxolan-2-yl]propanoic acid	0.00026836723466772	1.24165820244692	68.3137445172481	2	Public	NA	NA	NA	NA	NA	NA	NA	NA	NA	2.80366e+07	1.76627e+07	2.52077e+07	1.83855e+06	8.28731e+07	1.16636e+07	2.05038e+07	2.83641e+06	5.19883e+07	3.02541e+07	5.24991e+06	1.61457e+07	2.35433e+07	1.4022e+07	2.37496e+07	2.99827e+07	2.33365e+07	1.2975e+07	3.55641e+07	8.7239e+06	2.33079e+07
C1146	C1146_(2R)-7-hydroxy-8-(2-hydroxyethyl)-5-methoxy-2-methyl-3,4-dihydro-2H-1-benzopyran-4-one	3.361_253.10444	POS	3.361	253.104	C13 H16 O5	(2R)-7-hydroxy-8-(2-hydroxyethyl)-5-methoxy-2-methyl-3,4-dihydro-2H-1-benzopyran-4-one	-0.0026115271117817	-10.3591013816951	59.9082775984772	3	mzCloud	NA	NA	NA	NA	NA	NA	NA	NA	NA	4.33018e+07	4.01746e+07	3.45507e+07	4.87043e+07	3.08775e+07	1.37345e+07	3.71702e+07	2.55106e+07	3.5059e+07	2.79608e+07	8.40919e+06	2.96588e+07	1.7248e+07	4.62858e+07	6.41258e+07	1.74594e+07	4.0498e+07	1.59833e+07	3.55583e+07	1.38879e+07	3.13079e+07
C1551	C1551_(2R,2'R,4'aS,6'S,7'R,8'aS)-4,6',7'-trihydroxy-2',5',5',8'a-tetramethyl-3,3',4',4'a,5',6,6',7,7',8,8',8'a-dodecahydro-2'H-spiro[furo[2,3-e]isoindole-2,1'-naphthalene]-6-one	6.728_384.21698	POS	6.728	384.217	C23 H31 N O5	(2R,2'R,4'aS,6'S,7'R,8'aS)-4,6',7'-trihydroxy-2',5',5',8'a-tetramethyl-3,3',4',4'a,5',6,6',7,7',8,8',8'a-dodecahydro-2'H-spiro[furo[2,3-e]isoindole-2,1'-naphthalene]-6-one	-18.0105214959999	-44889.3661552601	17.6664112055241	3	mzCloud	NA	NA	NA	NA	NA	NA	NA	NA	NA	1.34346e+06	1.61357e+06	1.63761e+06	831055	1.68768e+06	5.26007e+06	1.8743e+06	2.2004e+06	1.49628e+06	1.6764e+06	1.73508e+06	1.97353e+06	1.72001e+06	241497	757436	2.78755e+06	2.13363e+06	2.27409e+06	1.04607e+06	1.75674e+06	1.80232e+06
A3141	A3141_(2R,3R)-2-Aminooctadecane-1,3-diol	HMDB0242634	POS	3.431	302.305	C18 H39 N O2	(2R,3R)-2-Aminooctadecane-1,3-diol	4.34486676113011e-05	0.144204927234021	NA	4	HMDB	NA	HMDB0242634	Organic nitrogen compounds	Amines	Organonitrogen compounds	Amines	NA	NA	NA	9.96883e+06	1.81234e+07	9.67111e+06	2.11933e+07	1.12051e+07	9.21186e+06	9.56902e+06	2.34924e+06	3.85128e+07	5.65511e+06	1.27119e+07	6.24141e+06	6.36859e+06	4.14292e+07	4.25921e+07	1.36752e+06	8.305e+06	6.31981e+06	5.44222e+06	4.27477e+06	1.35256e+07
A3137	A3137_(2R,3R)-2-Benzhydryl-N-[(2-methoxyphenyl)methyl]-1-azabicyclo[2.2.2]octan-3-amine	HMDB0242571	NEG	0.541	393.232	C28 H32 N2 O	(2R,3R)-2-Benzhydryl-N-[(2-methoxyphenyl)methyl]-1-azabicyclo[2.2.2]octan-3-amine	-0.00171086538898635	-4.15005291724658	NA	4	HMDB	NA	HMDB0242571	Benzenoids	Diphenylmethanes	Benzene and substituted derivatives	Benzene and derivatives	NA	NA	NA	3.30358e+06	2.2779e+06	1.30247e+06	2.72349e+06	525177	187774	2.3901e+06	482150	2.8749e+06	1.02706e+06	1.08366e+06	2.2367e+06	5.67975e+06	285155	8.97409e+06	353670	1.223e+06	618739	2.66686e+06	782055	2.04991e+06
C2909	C2909_(2R,3R)-3-Methylglutamyl-5-semialdehyde-N6-lysine;	C20279	POS	2.63	274.176	C12 H23 N3 O4	(2R,3R)-3-Methylglutamyl-5-semialdehyde-N6-lysine;	-0.00016073917572612	-0.588424237033679	NA	4	KEGG	C20279	NA	NA	NA	NA	NA	Amino acid metabolism	Lysine biosynthesis	map01100 Metabolic pathways;	371017	642847	371785	319954	309588	811516	453588	960582	387207	337025	939821	634011	326142	8.37887e+06	366611	687095	278192	643979	296650	2.35345e+08	1.26431e+07
A3136	A3136_(2R,3R,4R)-Hexane-1,2,3,4,6-pentol	HMDB0242546	NEG	5.793	165.077	C6 H14 O5	(2R,3R,4R)-Hexane-1,2,3,4,6-pentol	0.00028638871094699	1.72435934904364	NA	4	HMDB	NA	HMDB0242546	Organic oxygen compounds	Carbohydrates and carbohydrate conjugates	Organooxygen compounds	Carbohydrates	NA	NA	NA	282145	450558	986027	181552	113585	739594	485935	488026	203591	427902	593647	397966	168483	2.78188e+06	64068.9	271981	577885	769660	565982	822069	568627
C4314	C4314_(2R,3R,4R,5R)-2-Amino-4,5,6-trihydroxy-3-[(2R)-1-oxopropan-2-yl]oxyhexanal	HMDB0255309	POS	0.713	236.113	C9 H17 N O6	(2R,3R,4R,5R)-2-Amino-4,5,6-trihydroxy-3-[(2R)-1-oxopropan-2-yl]oxyhexanal	0.00018516216675834	0.787570253154865	NA	4	HMDB	NA	HMDB0255309	Organic oxygen compounds	Carbohydrates and carbohydrate conjugates	Organooxygen compounds	Carbohydrates	NA	NA	NA	1.94136e+07	1.73957e+07	2.20839e+07	1.61861e+07	1.30166e+07	2.25911e+07	1.80252e+07	4.29647e+07	1.98866e+07	1.90337e+07	4.22107e+07	1.6887e+07	3.45595e+07	2.98649e+07	1.72009e+07	3.24198e+07	3.18827e+07	2.42783e+07	1.56125e+07	4.51365e+07	2.50325e+07
C356	C356_(2R,3R,4S,5S,6R)-2-[(3Z)-hex-3-en-1-yloxy]-6-(hydroxymethyl)oxane-3,4,5-triol	5.478_227.12797	POS	5.478	227.128	C12 H22 O6	(2R,3R,4S,5S,6R)-2-[(3Z)-hex-3-en-1-yloxy]-6-(hydroxymethyl)oxane-3,4,5-triol	-18.0104635000701	-68705.0848526656	66.5844689427093	2	mzCloud	NA	NA	NA	NA	NA	NA	NA	NA	NA	6.80663e+06	7.95193e+06	7.47418e+06	7.08703e+06	8.94179e+06	5.28883e+06	8.23962e+06	5.96451e+06	5.01254e+06	4.23741e+06	2.32206e+06	4.16993e+06	3.21398e+06	6.81479e+06	9.3682e+06	3.67882e+06	1.40287e+07	3.87946e+06	4.33448e+06	1.19761e+06	6.00063e+06
A98	A98_(2R,3R,4S,5S,6R)-2-{[(2E)-4-ethenyl-2,5-dimethylhexa-2,5-dien-1-yl]oxy}-6-(hydroxymethyl)oxane-3,4,5-triol	0.865_297.16961	POS	0.865	297.17	C16 H26 O6	(2R,3R,4S,5S,6R)-2-{[(2E)-4-ethenyl-2,5-dimethylhexa-2,5-dien-1-yl]oxy}-6-(hydroxymethyl)oxane-3,4,5-triol	-18.0104490010325	-57326.5447173824	66.9394271051111	2	mzCloud	NA	NA	NA	NA	NA	NA	NA	NA	NA	1.04018e+06	740389	1.16196e+06	1.24538e+06	1.76546e+06	784422	1.49989e+06	2.33743e+06	1.18135e+06	989858	523334	832452	1.42932e+06	1.99187e+06	1.2974e+06	1.10311e+06	1.26008e+06	1.17672e+06	1.23444e+06	747509	1.21713e+06
A3980	A3980_(2R,3R,5S)-1,2,3,5,6-Pentahydroxyheptan-4-one	HMDB0255312	NEG	2.792	239.077	C7 H14 O6	(2R,3R,5S)-1,2,3,5,6-Pentahydroxyheptan-4-one	0.0001914912356824	0.986666245030918	NA	4	HMDB	NA	HMDB0255312	Organic oxygen compounds	Carbohydrates and carbohydrate conjugates	Organooxygen compounds	Carbohydrates	NA	NA	NA	312626	390361	4.27255e+06	394038	1.40397e+06	125128	878545	1.2691e+06	474510	2.3852e+06	210372	860409	2.69652e+06	166117	298307	169378	1.18312e+06	4.40791e+06	255482	215220	1.11844e+06
A3145	A3145_(2R,3S)-2-Octyl-3-pentyloxane	HMDB0242702	NEG	0.728	267.269	C18 H36 O	(2R,3S)-2-Octyl-3-pentyloxane	3.58862182565645e-05	0.133765733422586	NA	4	HMDB	NA	HMDB0242702	Organoheterocyclic compounds	NA	Oxanes	Oxanes	NA	NA	NA	3.42743e+06	1.72446e+06	69477.1	1.50847e+06	946913	3.85828e+06	1.32843e+06	542540	3.98135e+06	1.00941e+06	2.44599e+07	1.56389e+06	1.76366e+06	483160	5.11312e+06	1.38798e+07	1.30291e+06	561757	2.57285e+06	2.14572e+07	4.57775e+06
A3147	A3147_(2R,3S,4R,5R,8R,9S,10R,11R)-5-Amino-1,2,3,4,8,9,10,11-octahydroxydodecane-6,7-dione	HMDB0242759	POS	12.281	364.12	C12 H23 N O10	(2R,3S,4R,5R,8R,9S,10R,11R)-5-Amino-1,2,3,4,8,9,10,11-octahydroxydodecane-6,7-dione	-0.00164633853933083	-4.82610131829046	NA	4	HMDB	NA	HMDB0242759	Organic oxygen compounds	Carbohydrates and carbohydrate conjugates	Organooxygen compounds	Carbohydrates	NA	NA	NA	1.62009e+06	270531	15486.1	15678.3	18017.3	499707	18689.5	28946	22124.2	21605.4	99302.4	1.04097e+06	20360.2	5.9784e+07	99623.7	196472	96574.2	25071.4	19833.1	64736.4	3.19889e+06
A148	A148_(2R,3S,4S,5R,6R)-2-(hydroxymethyl)-6-(2-phenylethoxy)oxane-3,4,5-triol	1.234_267.12286	POS	1.234	267.123	C14 H20 O6	(2R,3S,4S,5R,6R)-2-(hydroxymethyl)-6-(2-phenylethoxy)oxane-3,4,5-triol	-18.010401544465	-63388.7862865514	60.1904899729128	2	mzCloud	NA	NA	NA	NA	NA	NA	NA	NA	NA	4.36144e+06	3.84741e+06	245781	4.86228e+06	6.12709e+06	2.57298e+06	4.22345e+06	5.35222e+06	4.95926e+06	3.98897e+06	318299	1.68662e+06	4.64774e+06	1.60349e+07	893117	1.10402e+06	2.70753e+06	7.28007e+06	3.55841e+06	1.02876e+06	3.99002e+06
C1309	C1309_(2R,3S,4S,5R,6R)-2-(hydroxymethyl)-6-[2-(4-hydroxyphenyl)ethoxy]oxane-3,4,5-triol	4.288_323.10943	POS	4.288	323.109	C14 H20 O7	(2R,3S,4S,5R,6R)-2-(hydroxymethyl)-6-[2-(4-hydroxyphenyl)ethoxy]oxane-3,4,5-triol	21.9812539311128	73241.3294976694	49.7954465399364	3	mzCloud	NA	NA	NA	NA	NA	NA	NA	NA	NA	1.59568e+06	2.89598e+06	386383	2.9003e+06	864195	36506.4	1.36779e+06	366725	1.35186e+06	850207	39228	1.04427e+06	515171	435002	5.49624e+06	111927	1.70814e+06	226464	1.07274e+06	44364.6	1.16546e+06
C1583	C1583_(2R,3S,4S,5R,6S)-2-({[(2S,3R,4R)-3,4-dihydroxy-4-(hydroxymethyl)oxolan-2-yl]oxy}methyl)-6-(3,4,5-trimethoxyphenoxy)oxane-3,4,5-triol	7.846_517.13824	POS	7.846	517.138	C20 H30 O13	(2R,3S,4S,5R,6S)-2-({[(2S,3R,4R)-3,4-dihydroxy-4-(hydroxymethyl)oxolan-2-yl]oxy}methyl)-6-(3,4,5-trimethoxyphenoxy)oxane-3,4,5-triol	37.9623225130151	79391.0752019233	22.8102742778757	3	mzCloud	NA	NA	NA	NA	NA	NA	NA	NA	NA	3.33925e+06	8.75192e+06	7.25454e+06	6.22781e+06	7.64305e+06	1.4397e+07	5.03498e+06	7.68277e+06	8.23679e+06	8.5229e+06	2.11591e+07	9.19133e+06	1.04464e+07	3.2669e+06	6.77398e+06	1.47994e+07	2.39853e+06	8.81287e+06	973516	2.42974e+07	8.96052e+06
A865	A865_(2R,3S,4S,5S,6R)-2-({7-hydroxy-4-[(3Z)-5-hydroxy-3-methylpent-3-en-1-yl]-4a,8,8-trimethyl-3-methylidene-decahydronaphthalen-2-yl}oxy)-6-(hydroxymethyl)oxane-3,4,5-triol	0.83_502.33776	POS	0.83	502.338	C26 H44 O8	(2R,3S,4S,5S,6R)-2-({7-hydroxy-4-[(3Z)-5-hydroxy-3-methylpent-3-en-1-yl]-4a,8,8-trimethyl-3-methylidene-decahydronaphthalen-2-yl}oxy)-6-(hydroxymethyl)oxane-3,4,5-triol	17.0263092733911	35156.271058814	32.6801507467041	3	mzCloud	NA	NA	NA	NA	NA	NA	NA	NA	NA	132294	225446	54860.3	30812.2	12840.7	36641	17996.3	39935.5	67081.9	17060.3	79395.9	147781	29662.5	1.19809e+06	110474	51800	1.08247e+06	143982	213501	87389.1	188975
C2228	C2228_(2R,3S,4S,9R,12R,13R,14S,15R,16R,17S)-3,4,12,13,15,16-hexahydroxy-2,6,14,17-tetramethyl-10-oxatetracyclo[7.7.1.0	2.775_397.18635	NEG	2.775	397.186	C20 H30 O8	(2R,3S,4S,9R,12R,13R,14S,15R,16R,17S)-3,4,12,13,15,16-hexahydroxy-2,6,14,17-tetramethyl-10-oxatetracyclo[7.7.1.0	-0.00044503128680162	-1.11762410066066	31.7825957243202	4	Public	NA	NA	NA	NA	NA	NA	NA	NA	NA	1.98551e+06	2.06021e+06	2.3343e+06	1.40125e+06	457433	703666	2.11377e+06	999709	1.33732e+06	1.6494e+06	123906	1.87552e+06	1.7816e+06	613996	2.15099e+06	431872	3.31348e+06	1.59296e+06	1.32623e+06	18065.3	1.41356e+06
C3403	C3403_(2R,3S,5R)-2-[6-[[(1S,2S)-2-Hydroxycyclopentyl]amino]-9-purinyl]-5-(hydroxymethyl)oxolane-3,4-diol	HMDB0242715	POS	0.711	352.16	C15 H21 N5 O5	(2R,3S,5R)-2-[6-[[(1S,2S)-2-Hydroxycyclopentyl]amino]-9-purinyl]-5-(hydroxymethyl)oxolane-3,4-diol	-0.00132172919018103	-3.76395592551858	NA	4	HMDB	NA	HMDB0242715	Nucleosides, nucleotides, and analogues	NA	Purine nucleosides	Purines and derivatives	NA	NA	NA	1.61281e+06	1.61334e+06	1.62228e+06	1.85717e+06	1.85389e+06	869430	1.59915e+06	1.28018e+06	1.46787e+06	1.64611e+06	1.36663e+06	1.40802e+06	1.62704e+06	602889	2.0543e+06	794218	2.43457e+06	654038	666650	1.64815e+06	1.43394e+06
C4562	C4562_(2R,3S,5R)-5-(4,5-Dihydroimidazo[2,1-f]purin-3-yl)-2-(hydroxymethyl)oxolan-3-ol	HMDB0257763	POS	1.047	278.123	C12 H15 N5 O3	(2R,3S,5R)-5-(4,5-Dihydroimidazo[2,1-f]purin-3-yl)-2-(hydroxymethyl)oxolan-3-ol	-0.00135254256622375	-4.88075498188264	NA	4	HMDB	NA	HMDB0257763	Organoheterocyclic compounds	NA	Imidazopyrimidines	Imidazopyrimidines	NA	NA	NA	8.44704e+06	6.84026e+06	7.31275e+06	8.46567e+06	9.10304e+06	7.39713e+06	9.68826e+06	7.95776e+06	6.80899e+06	1.11868e+07	1.19719e+07	1.21019e+07	1.10268e+07	8.20011e+06	8.75573e+06	9.25657e+06	1.17057e+07	7.35692e+06	4.66118e+06	9.24937e+06	8.87469e+06
C3395	C3395_(2R,4S)-1-Tert-Butyl 2-methyl 4-aminopyrrolidine-1,2-dicarboxylate	HMDB0242584	POS	2.551	245.15	C11 H20 N2 O4	(2R,4S)-1-Tert-Butyl 2-methyl 4-aminopyrrolidine-1,2-dicarboxylate	2.09166674949302e-05	0.0856740798100599	NA	4	HMDB	NA	HMDB0242584	Organic acids and derivatives	Amino acids, peptides, and analogues	Carboxylic acids and derivatives	Amino acids, peptides, and analogues	NA	NA	NA	1.8449e+07	2.22613e+07	2.85725e+07	2.26066e+07	2.43215e+07	3.67922e+07	1.96705e+07	1.30814e+07	2.14259e+07	3.03438e+07	6.38828e+07	2.46264e+07	2.77076e+07	2.89085e+07	2.98551e+07	4.19737e+07	2.55354e+07	2.08836e+07	1.46145e+07	6.1404e+07	2.88458e+07
C3939	C3939_(2R,4S)-4-Carbamimidamido-3-acetamido-2-((1R,2R)-2-hydroxy-1-methoxy-3-(octanoyloxy)propyl)-3,4-dihydro-2H-pyran-6-carboxylic acid	HMDB0250552	POS	4.793	473.26	C21 H36 N4 O8	(2R,4S)-4-Carbamimidamido-3-acetamido-2-((1R,2R)-2-hydroxy-1-methoxy-3-(octanoyloxy)propyl)-3,4-dihydro-2H-pyran-6-carboxylic acid	-0.00036667276719981	-0.776432385804259	NA	4	HMDB	NA	HMDB0250552	Lipids and lipid-like molecules	Fatty acid esters	Fatty Acyls	Fatty acyls[FA]	NA	NA	NA	4.73528e+06	3.97235e+06	3.12269e+06	4.758e+06	3.21548e+06	1.08355e+06	3.81876e+06	3.68304e+06	3.10381e+06	3.35705e+06	819807	2.13934e+06	3.97727e+06	4.60612e+06	5.94895e+06	1.35572e+06	4.67209e+06	1.40271e+06	2.76118e+06	659805	3.15965e+06
C3394	C3394_(2R,4S)-Pyrrolidine-2,4-dicarboxylic acid	HMDB0242583	POS	1.161	160.061	C6 H9 N O4	(2R,4S)-Pyrrolidine-2,4-dicarboxylic acid	0.00020001468246277	1.2575335528878	NA	4	HMDB	NA	HMDB0242583	Organic acids and derivatives	Amino acids, peptides, and analogues	Carboxylic acids and derivatives	Amino acids, peptides, and analogues	NA	NA	NA	7.41244e+07	6.67387e+07	6.85714e+07	1.00913e+08	7.63564e+07	4.45022e+07	6.77048e+07	4.85476e+07	6.74287e+07	7.71026e+07	1.4657e+07	5.22784e+07	7.4133e+07	5.84136e+07	8.68979e+07	3.24299e+07	7.53792e+07	4.93212e+07	5.62164e+07	2.18598e+07	6.06788e+07
C4905	C4905_(2R,4aR,7S,8S,8aR)-8-[(Z)-5-hydroxy-3-methylpent-3-enyl]-4,4,7,8a-tetramethyl-2,3,4a,5,6,8-hexahydro-1H-naphthalene-2,7-diol	PB01523	POS	8.881	342.3	C20 H36 O3	(2R,4aR,7S,8S,8aR)-8-[(Z)-5-hydroxy-3-methylpent-3-enyl]-4,4,7,8a-tetramethyl-2,3,4a,5,6,8-hexahydro-1H-naphthalene-2,7-diol	17.0263852994522	52507.3918941969	31.2327883246726	4	Public	NA	NA	NA	NA	NA	NA	NA	NA	NA	1.47418e+07	2.15862e+06	8.36688e+06	4.52778e+06	6.13074e+06	1.49411e+07	7.58819e+06	1.02899e+07	4.31483e+06	2.67516e+06	4.02852e+06	2.37695e+06	3.23572e+06	1.3006e+07	8.37616e+06	8.3787e+06	1.05314e+07	7.28014e+06	1.64745e+06	3.35372e+07	8.40666e+06
A3133	A3133_(2R,5R)-3-(2-Hydroxyethylidene)-7-oxo-4-oxa-1-azabicyclo[3.2.0]heptane-2-carboxylic acid	HMDB0242517	NEG	1.322	198.041	C8 H9 N O5	(2R,5R)-3-(2-Hydroxyethylidene)-7-oxo-4-oxa-1-azabicyclo[3.2.0]heptane-2-carboxylic acid	0.00015894984377951	0.798550028477048	NA	4	HMDB	NA	HMDB0242517	Organic acids and derivatives	Amino acids, peptides, and analogues	Carboxylic acids and derivatives	Amino acids, peptides, and analogues	NA	NA	NA	8.51465e+07	5.90996e+07	3.90707e+08	7.61118e+07	2.8432e+08	7.19566e+07	5.51935e+07	7.72073e+07	6.272e+07	1.27004e+08	9.98367e+06	2.06757e+07	1.10529e+08	2.77963e+08	2.5504e+08	3.31304e+07	1.23748e+08	1.15965e+08	5.087e+07	1.72852e+07	1.15233e+08
C284	C284_(2R,5R,6R)-3-[(1E,3E)-hepta-1,3-dien-1-yl]-5,6-dihydroxy-2-(hydroxymethyl)cyclohexan-1-one	4.378_237.14894	POS	4.378	237.149	C14 H22 O4	(2R,5R,6R)-3-[(1E,3E)-hepta-1,3-dien-1-yl]-5,6-dihydroxy-2-(hydroxymethyl)cyclohexan-1-one	-18.0101098871178	-70863.5911494378	82.7942859652131	2	mzCloud	NA	NA	NA	NA	NA	NA	NA	NA	NA	6.31027e+06	4.35931e+06	4.65223e+06	5.38051e+06	6.76696e+06	3.30121e+06	6.19971e+06	4.98139e+06	4.0666e+06	4.41258e+06	749251	4.4509e+06	3.98233e+06	1.07753e+07	5.08041e+06	2.44992e+06	5.46859e+06	4.65572e+06	6.05395e+06	1.75209e+06	4.79246e+06
C4571	C4571_(2R,5S,8R)-2,8-Dimethyl-5-propan-2-ylcyclodecan-1-one	HMDB0257819	POS	8.667	225.222	C15 H28 O	(2R,5S,8R)-2,8-Dimethyl-5-propan-2-ylcyclodecan-1-one	0.00024084306761551	1.0741659799584	NA	4	HMDB	NA	HMDB0257819	Lipids and lipid-like molecules	Sesquiterpenoids	Prenol lipids	Terpenoids	NA	NA	NA	3.93854e+06	810404	3.72162e+06	1.06278e+06	2.84367e+06	9.46465e+06	2.84693e+06	4.0137e+06	2.86349e+06	3.52474e+06	1.97987e+06	1.8566e+06	5.13134e+06	554785	1.6356e+06	4.4825e+06	3.77817e+06	2.36577e+06	643714	3.45957e+06	3.04892e+06
A3134	A3134_(2R,6S)-2,6-Diaminoheptanedioic acid	HMDB0242532	NEG	11.436	171.078	C7 H14 N2 O4	(2R,6S)-2,6-Diaminoheptanedioic acid	0.00019156887879034	1.00775148848977	NA	4	HMDB	NA	HMDB0242532	Organic acids and derivatives	Amino acids, peptides, and analogues	Carboxylic acids and derivatives	Amino acids, peptides, and analogues	NA	NA	NA	1.9064e+06	1.45398e+06	4.30272e+06	1.31085e+06	341146	4.07959e+06	6.31777e+06	7.16373e+06	184764	5.0052e+06	724770	5.53029e+06	6.44245e+06	9.98995e+06	88027.7	3.15554e+06	5.26325e+06	9.32233e+06	228095	314123	3.65625e+06
A4151	A4151_(2S)-1,2-Dimethyl-3,4-dioxoazetidine-2-carboxylic acid	HMDB0257875	NEG	10.128	156.031	C6 H7 N O4	(2S)-1,2-Dimethyl-3,4-dioxoazetidine-2-carboxylic acid	0.00034763328125109	2.21369586503139	NA	4	HMDB	NA	HMDB0257875	Organic acids and derivatives	Amino acids, peptides, and analogues	Carboxylic acids and derivatives	Amino acids, peptides, and analogues	NA	NA	NA	409480	351073	371305	355272	2.04127e+06	1.2302e+06	709070	469752	350288	323211	689800	344684	365978	383079	376593	345772	528016	281977	934551	534033	569770
A3676	A3676_(2S)-1-[(2S)-3-(4H-Imidazol-4-yl)-2-[[(2S)-5-oxopyrrolidine-2-carbonyl]amino]propanoyl]pyrrolidine-2-carboxylic acid	HMDB0250908	NEG	3.321	362.146	C16 H21 N5 O5	(2S)-1-[(2S)-3-(4H-Imidazol-4-yl)-2-[[(2S)-5-oxopyrrolidine-2-carbonyl]amino]propanoyl]pyrrolidine-2-carboxylic acid	-0.00087383593751155	-2.40623892652592	NA	4	HMDB	NA	HMDB0250908	Organic acids and derivatives	Amino acids, peptides, and analogues	Carboxylic acids and derivatives	Amino acids, peptides, and analogues	NA	NA	NA	88939.2	122159	128263	100508	82584.4	129082	113011	76617.3	154346	129046	381035	84144.1	147424	2.9355e+06	208213	206680	120589	128439	90607.6	525100	297614
A3629	A3629_(2S)-1-[2-(2-Adamantylamino)acetyl]pyrrolidine-2-carbonitrile	HMDB0250066	POS	11.978	288.208	C17 H25 N3 O	(2S)-1-[2-(2-Adamantylamino)acetyl]pyrrolidine-2-carbonitrile	0.00087759028741629	3.05567901670757	NA	4	HMDB	NA	HMDB0250066	Organic acids and derivatives	Amino acids, peptides, and analogues	Carboxylic acids and derivatives	Amino acids, peptides, and analogues	NA	NA	NA	11902.6	12297.7	8455.4	12150.9	11461.8	23570.4	2.46798e+06	10956.9	16864.1	13629	43772.9	12901	15365.6	49160.2	25097.8	32660.7	9256.72	5.57468e+06	779820	40135.1	458606
C4810	C4810_(2S)-1-[2-[[(2S)-Pyrrolidine-2-carbonyl]amino]acetyl]pyrrolidine-2-carboxylic Acid	HMDB0260136	POS	2.462	270.145	C12 H19 N3 O4	(2S)-1-[2-[[(2S)-Pyrrolidine-2-carbonyl]amino]acetyl]pyrrolidine-2-carboxylic Acid	-0.00027224802090586	-1.01155715680278	NA	4	HMDB	NA	HMDB0260136	Organic acids and derivatives	Amino acids, peptides, and analogues	Carboxylic acids and derivatives	Amino acids, peptides, and analogues	NA	NA	NA	3.94304e+06	6.10809e+06	7.76066e+06	5.24852e+06	7.05588e+06	1.51046e+07	1.38263e+07	1.68035e+07	6.38518e+06	8.11899e+06	8.69877e+07	1.74276e+07	2.04807e+07	2.1996e+07	8.08981e+06	7.39189e+07	1.62687e+07	2.99194e+07	5.01048e+06	5.15194e+07	2.10987e+07
A3385	A3385_(2S)-2,5-Diamino-4-fluoro-5-oxopentanoic acid	HMDB0246428	POS	0.868	165.066	C5 H9 F N2 O3	(2S)-2,5-Diamino-4-fluoro-5-oxopentanoic acid	-0.00075414414263264	-4.59676599101543	NA	4	HMDB	NA	HMDB0246428	Organic acids and derivatives	Amino acids, peptides, and analogues	Carboxylic acids and derivatives	Amino acids, peptides, and analogues	NA	NA	NA	285565	190037	122036	213292	139974	572427	129250	240650	316522	118076	3.62311e+06	176426	395392	1.17676e+06	608359	1.85217e+06	140791	181308	109323	4.53768e+06	756458
C4996	C4996_(2S)-2-((1S)-1-Hydroxypentyl)-4-methoxy-2,3-dihydropyran-6-one	PB03346	POS	7.157	215.128	C11 H18 O4	(2S)-2-((1S)-1-Hydroxypentyl)-4-methoxy-2,3-dihydropyran-6-one	0.0003337119084108	1.55852379607559	54.1924895804006	4	Public	NA	NA	NA	NA	NA	NA	NA	NA	NA	373508	373372	3.54913e+06	263600	418741	1.35838e+06	536919	4.01829e+06	477146	483859	6.19837e+06	478830	592914	3.0064e+06	201899	1.16619e+06	327574	1.89947e+06	609674	1.1013e+06	1.37178e+06
C4556	C4556_(2S)-2-(2-Benzamidoethylamino)-5-(diaminomethylideneamino)pentanoic acid	HMDB0257707	POS	2.751	322.187	C15 H23 N5 O3	(2S)-2-(2-Benzamidoethylamino)-5-(diaminomethylideneamino)pentanoic acid	-0.00044595398435376	-1.38848577152429	NA	4	HMDB	NA	HMDB0257707	Organic acids and derivatives	Amino acids, peptides, and analogues	Carboxylic acids and derivatives	Amino acids, peptides, and analogues	NA	NA	NA	7.39777e+06	6.51845e+06	4.41739e+06	7.28249e+06	4.6388e+06	602955	4.94121e+06	2.52165e+06	4.69537e+06	4.72714e+06	790530	5.71831e+06	4.87112e+06	1.28725e+06	8.93585e+06	1.40897e+06	7.16667e+06	2.09491e+06	3.70218e+06	1.46303e+06	4.2591e+06
C1513	C1513_(2S)-2-(2-hydroxypropan-2-yl)-2H,3H,7H-furo[3,2-g]chromen-7-one	5.978_247.09633	POS	5.978	247.096	C14 H14 O4	(2S)-2-(2-hydroxypropan-2-yl)-2H,3H,7H-furo[3,2-g]chromen-7-one	18.010558550788	73187.1122555467	67.3381439028761	3	mzCloud	NA	NA	NA	NA	NA	NA	NA	NA	NA	580031	490927	4.233e+06	560162	1.06168e+06	564428	522657	1.27641e+06	385188	275610	177582	630125	400976	5.34928e+06	821524	262349	517310	2.83504e+06	446172	169676	1.07801e+06
A3622	A3622_(2S)-2-(3,8-Dimethylazulen-5-yl)propanoic acid	HMDB0249880	POS	8.853	229.122	C15 H16 O2	(2S)-2-(3,8-Dimethylazulen-5-yl)propanoic acid	-0.00048013812502745	-2.10480706028441	NA	4	HMDB	NA	HMDB0249880	Lipids and lipid-like molecules	Sesquiterpenoids	Prenol lipids	Terpenoids	NA	NA	NA	8870.35	9677.44	8916.51	7787.99	8297.82	17769.6	9771.81	9123.48	12233.6	9558.43	31244.8	9860.53	12065.7	1.83927e+06	18654.3	23236	10572.9	9784.3	9598.35	28404.6	104735
A4164	A4164_(2S)-2-Amino-3-(4-hydroxyphenyl)propane-1,1-diol	HMDB0257983	NEG	2.21	182.082	C9 H13 N O3	(2S)-2-Amino-3-(4-hydroxyphenyl)propane-1,1-diol	0.00014615972656884	0.798296418365976	NA	4	HMDB	NA	HMDB0257983	Benzenoids	Phenethylamines	Benzene and substituted derivatives	Amines and derivatives	NA	NA	NA	5.71671e+06	4.72784e+06	3.49011e+06	5.10707e+06	7.92807e+06	7.07858e+06	4.2087e+06	3.4975e+06	4.35497e+06	5.99381e+06	3.6759e+06	4.68101e+06	3.44575e+06	6.84338e+06	4.5282e+06	5.70758e+06	3.14487e+06	3.96381e+06	6.3903e+06	3.10869e+06	4.87964e+06
C4544	C4544_(2S)-2-Amino-3-[(2S)-2-aminopropanoyl]oxypropanoic acid	HMDB0257605	NEG	0.667	175.072	C6 H12 N2 O4	(2S)-2-Amino-3-[(2S)-2-aminopropanoyl]oxypropanoic acid	-0.00018240888869058	-1.03594498223021	NA	4	HMDB	NA	HMDB0257605	Organic acids and derivatives	Amino acids, peptides, and analogues	Carboxylic acids and derivatives	Amino acids, peptides, and analogues	NA	NA	NA	693998	704516	1.00969e+06	621045	710592	1.24205e+06	1.51875e+06	1.27946e+06	790883	726709	1.8026e+06	2.1062e+06	1.17367e+06	1.61996e+06	743111	3.2982e+06	1.47093e+06	1.69422e+06	717883	4.45622e+06	1.41903e+06
A4130	A4130_(2S)-2-Amino-3-[(2S,3R)-2-amino-3-hydroxybutanoyl]oxypropanoic acid	HMDB0257561	NEG	10.174	205.083	C7 H14 N2 O5	(2S)-2-Amino-3-[(2S,3R)-2-amino-3-hydroxybutanoyl]oxypropanoic acid	0.00029658383900255	1.43909674609594	NA	4	HMDB	NA	HMDB0257561	Organic acids and derivatives	Amino acids, peptides, and analogues	Carboxylic acids and derivatives	Amino acids, peptides, and analogues	NA	NA	NA	916641	618578	3.0859e+06	791345	1.53241e+06	4.24083e+06	2.16589e+06	3.78595e+06	707938	1.05813e+06	2.09846e+06	4.81653e+06	1.12588e+06	2.03359e+06	470453	6.17088e+06	1.32694e+06	5.6676e+06	1.0879e+06	4.56279e+06	2.41323e+06
C2964	C2964_(2S)-2-Amino-4-{[(1R)-1-carboxy-2-(1H-imidazol-4-yl)ethyl]amino}butanoate; N-[(3S)-3-amino-3-carboxypropyl]-D-histidine;	C22025	POS	2.484	257.124	C10 H16 N4 O4	(2S)-2-Amino-4-{[(1R)-1-carboxy-2-(1H-imidazol-4-yl)ethyl]amino}butanoate; N-[(3S)-3-amino-3-carboxypropyl]-D-histidine;	1.91735937846715e-05	0.0748625908860148	NA	4	KEGG	C22025	NA	NA	NA	NA	NA	Global and overview maps	Metabolic pathways	map00470 D-Amino acid metabolism; map01100 Metabolic pathways;	519330	448515	579506	1.05685e+06	533993	208191	324608	267582	423857	770171	135666	205460	657782	2.99053e+06	1.38036e+06	173695	448502	186397	115518	96287.4	576140
C4997	C4997_(2S)-2-[(1S,2R)-1,2-dihydroxypentyl]-4-methoxy-2,3-dihydropyran-6-one	PB03363	POS	2.303	248.149	C11 H18 O5	(2S)-2-[(1S,2R)-1,2-dihydroxypentyl]-4-methoxy-2,3-dihydropyran-6-one	17.0264585733149	73990.9490263058	10.8012282160154	4	Public	NA	NA	NA	NA	NA	NA	NA	NA	NA	1.05624e+07	1.20213e+07	9.13238e+06	1.3351e+07	1.09685e+07	3.87441e+06	9.78691e+06	1.45001e+07	1.2587e+07	1.02484e+07	1.51978e+06	9.07963e+06	1.63718e+07	5.36397e+07	1.55772e+07	7.24532e+06	9.91579e+06	1.49858e+07	4.66777e+06	5.75677e+06	1.22896e+07
C4584	C4584_(2S)-2-[(2-Carboxy-2-oxoethyl)amino]pentanedioic acid	HMDB0257920	POS	0.751	234.061	C8 H11 N O7	(2S)-2-[(2-Carboxy-2-oxoethyl)amino]pentanedioic acid	0.00017682252828876	0.758720590730862	NA	4	HMDB	NA	HMDB0257920	Organic acids and derivatives	Amino acids, peptides, and analogues	Carboxylic acids and derivatives	Amino acids, peptides, and analogues	NA	NA	NA	1.71499e+07	6.58463e+07	8.08775e+07	2.66021e+07	2.28087e+07	7.52928e+07	8.90284e+06	1.15282e+07	1.02051e+08	7.92635e+07	1.90026e+07	8.33907e+06	6.34098e+07	2.45483e+06	2.76021e+07	1.14513e+08	3.86094e+07	1.05544e+08	1.12325e+08	5.8963e+06	4.9401e+07
C4317	C4317_(2S)-2-[Acetamido(benzoyl)amino]pentanedioic acid	HMDB0255324	POS	3.903	309.108	C14 H16 N2 O6	(2S)-2-[Acetamido(benzoyl)amino]pentanedioic acid	-0.00017203617181849	-0.558376192701471	NA	4	HMDB	NA	HMDB0255324	Organic acids and derivatives	Amino acids, peptides, and analogues	Carboxylic acids and derivatives	Amino acids, peptides, and analogues	NA	NA	NA	1.93648e+06	1.82347e+06	1.30815e+06	2.33602e+06	1.63536e+06	907886	1.61057e+06	1.39912e+06	1.24043e+06	2.68892e+06	957544	1.51447e+06	1.49731e+06	1.28156e+06	1.71489e+06	1.07795e+06	1.80082e+06	1.39787e+06	1.43242e+06	922622	1.52419e+06
C4545	C4545_(2S)-2-[[(2S)-2-Amino-3-(1H-imidazol-5-yl)propanoyl]-(2-benzamidoethyl)amino]-4-methylpentanoic acid	HMDB0257607	POS	4.088	416.228	C21 H29 N5 O4	(2S)-2-[[(2S)-2-Amino-3-(1H-imidazol-5-yl)propanoyl]-(2-benzamidoethyl)amino]-4-methylpentanoic acid	-0.00104857619714949	-2.52533900572041	NA	4	HMDB	NA	HMDB0257607	Organic acids and derivatives	Amino acids, peptides, and analogues	Carboxylic acids and derivatives	Amino acids, peptides, and analogues	NA	NA	NA	2.03021e+06	1.99263e+06	1.38639e+06	1.15368e+06	625202	1.30669e+06	1.67971e+06	549312	1.70814e+06	1.54924e+06	336989	858497	1.65488e+06	581267	1.89e+06	288135	1.81521e+06	1.38895e+06	1.34122e+06	703145	1.24198e+06
C4811	C4811_(2S)-2-[[(2S)-2-Aminopropanoyl]-naphthalen-2-ylamino]pentanedioic acid	HMDB0260140	POS	4.968	345.144	C18 H20 N2 O5	(2S)-2-[[(2S)-2-Aminopropanoyl]-naphthalen-2-ylamino]pentanedioic acid	-0.00011956789057876	-0.347442482457598	NA	4	HMDB	NA	HMDB0260140	Organic acids and derivatives	Amino acids, peptides, and analogues	Carboxylic acids and derivatives	Amino acids, peptides, and analogues	NA	NA	NA	406340	390531	180633	401025	376286	89749.9	461493	500933	321541	445273	140478	232112	438652	1.2785e+06	346214	197685	310161	427519	144144	51414.8	357035
A4145	A4145_(2S)-3-Hydroxy-1-[(2S)-pyrrolidine-2-carbonyl]pyrrolidine-2-carboxylic acid	HMDB0257791	NEG	6.32	227.104	C10 H16 N2 O4	(2S)-3-Hydroxy-1-[(2S)-pyrrolidine-2-carbonyl]pyrrolidine-2-carboxylic acid	0.00040210816459307	1.76277405502228	NA	4	HMDB	NA	HMDB0257791	Organic acids and derivatives	Amino acids, peptides, and analogues	Carboxylic acids and derivatives	Amino acids, peptides, and analogues	NA	NA	NA	700983	1.11599e+06	3.25181e+06	742007	926041	867613	1.97656e+06	2.12979e+06	973946	1.08641e+06	74349.4	1.98404e+06	1.59102e+06	4.00897e+06	440094	254275	910260	2.32813e+06	1.10084e+06	322128	1.33926e+06
C2947	C2947_(2S)-3-Sulfolactaldehyde;	C21181	NEG	0.607	152.986	C3 H6 O5 S	(2S)-3-Sulfolactaldehyde;	-7.64510150759179e-05	-0.496455814489871	NA	4	KEGG	C21181	NA	NA	NA	NA	NA	NA	NA	NA	8.46353e+06	5.33187e+06	7.33989e+06	6.27948e+06	6.61123e+06	4.27195e+06	8.30801e+06	7.80532e+06	4.89152e+06	5.22503e+06	1.3431e+06	4.83921e+06	2.90431e+06	3.91492e+06	4.53644e+06	2.59326e+06	1.23796e+07	4.17272e+06	4.72347e+06	2.06125e+06	5.3998e+06
C4551	C4551_(2S)-4-(2-Aminophenyl)-2-formamido-4-oxobutanoic acid	HMDB0257647	POS	1.658	237.087	C11 H12 N2 O4	(2S)-4-(2-Aminophenyl)-2-formamido-4-oxobutanoic acid	-0.0003897620702844	-1.65097659444587	NA	4	HMDB	NA	HMDB0257647	Organic oxygen compounds	Carbonyl compounds	Organooxygen compounds	Carbonyl compounds	NA	NA	NA	7.21067e+06	5.28767e+06	4.93508e+06	7.78073e+06	9.64253e+06	1.71064e+06	5.37458e+06	1.23133e+06	5.64988e+06	5.63016e+06	3.4552e+06	5.66522e+06	6.05153e+06	9.79435e+06	7.03637e+06	5.9646e+06	6.83347e+06	4.59624e+06	4.96806e+06	2.62988e+06	5.57241e+06
A1290	A1290_(2S)-4-(3-Fluorobenzoyl)-N-[(3S)-2-oxo-3-piperidinyl]-1-(4-piperidinylcarbonyl)-2-piperazinecarboxamide	4.584_482.21506	POS	4.584	482.215	C23 H30 F N5 O4	(2S)-4-(3-Fluorobenzoyl)-N-[(3S)-2-oxo-3-piperidinyl]-1-(4-piperidinylcarbonyl)-2-piperazinecarboxamide	21.9795982430469	47862.0413133005	58.7048577821917	3	mzCloud	NA	NA	NA	NA	NA	NA	NA	NA	NA	75607.2	63572.4	53822	44482	78091.3	124910	61686.1	74414.3	57365.1	45717.1	162575	112524	70510	1.54085e+06	55495.1	238626	86801.3	119334	101420	384819	177631
C4550	C4550_(2S)-5-(Diaminomethylideneamino)-4-methyl-2-(methylamino)pentanoic acid	HMDB0257633	NEG	0.715	201.136	C8 H18 N4 O2	(2S)-5-(Diaminomethylideneamino)-4-methyl-2-(methylamino)pentanoic acid	-0.00015616576826005	-0.772551050504549	NA	4	HMDB	NA	HMDB0257633	Organic acids and derivatives	Amino acids, peptides, and analogues	Carboxylic acids and derivatives	Amino acids, peptides, and analogues	NA	NA	NA	1.41721e+06	2.58976e+06	1.51797e+06	837805	1.96986e+06	3.46846e+06	2.41603e+06	2.12975e+06	2.06297e+06	2.09707e+06	8.52934e+06	4.77901e+06	2.61082e+06	1.20156e+06	798213	6.23429e+06	1.34236e+06	3.45941e+06	1.84504e+06	2.49011e+07	3.8104e+06
C4583	C4583_(2S)-6-Hydroxy-2,7,8-trimethyl-2-[(4R,8R)-4,8,12-trimethyltridecanoyl]-3,4-dihydrochromene-5-carbaldehyde	HMDB0257918	POS	8.922	459.347	C29 H46 O4	(2S)-6-Hydroxy-2,7,8-trimethyl-2-[(4R,8R)-4,8,12-trimethyltridecanoyl]-3,4-dihydrochromene-5-carbaldehyde	0.0005301336731236	1.15663944771882	NA	4	HMDB	NA	HMDB0257918	Lipids and lipid-like molecules	Quinone and hydroquinone lipids	Prenol lipids	Quinone	NA	NA	NA	758041	2.4827e+06	1.23768e+06	1.74213e+06	1.39055e+06	244934	2.07423e+06	1.2588e+06	2.10386e+06	937913	302849	1.6751e+06	1.11879e+06	956138	3.519e+06	110428	2.65765e+06	1.95308e+06	1.9396e+06	235897	1.43497e+06
A1192	A1192_(2S)-N2-[(2S)-1-amino-3-cyclohexyl-1-oxo-2-propanyl]-N1-isopropyl-N4-phenyl-1,2,4-piperazinetricarboxamide	2.715_531.29596	NEG	2.715	531.296	C25 H38 N6 O4	(2S)-N2-[(2S)-1-amino-3-cyclohexyl-1-oxo-2-propanyl]-N1-isopropyl-N4-phenyl-1,2,4-piperazinetricarboxamide	46.0077825626562	94608.7038810284	3.19092757573587	3	mzCloud	NA	NA	NA	NA	NA	NA	NA	NA	NA	126357	148201	213076	149894	125285	157115	212464	132289	245048	238278	249671	141729	264495	2.44985e+07	311290	211712	205373	214737	156161	253694	1.41277e+06
C4546	C4546_(2S,3R)-2-Amino-3-[(2S)-2-amino-3-hydroxypropanoyl]oxybutanoic acid	HMDB0257621	POS	0.667	190.071	C7 H14 N2 O5	(2S,3R)-2-Amino-3-[(2S)-2-amino-3-hydroxypropanoyl]oxybutanoic acid	3.37328710315887e-05	0.16368007475153	NA	4	HMDB	NA	HMDB0257621	Organic acids and derivatives	Amino acids, peptides, and analogues	Carboxylic acids and derivatives	Amino acids, peptides, and analogues	NA	NA	NA	1.92006e+07	1.72867e+07	1.81511e+07	1.48863e+07	1.64721e+07	1.7165e+07	1.5641e+07	2.06625e+07	1.40076e+07	1.52585e+07	1.28243e+07	1.59089e+07	2.53185e+07	1.70622e+07	9.66002e+06	1.65158e+07	1.87544e+07	3.39506e+07	1.11406e+07	3.41048e+07	1.81986e+07
A1955	A1955_(2S,3R,4E,8E)-3-Hydroxy-2-[methyl(stearoyl)amino]-4,8-octadecadien-1-yl hydrogen sulfate	0.836_658.50996	POS	0.836	658.51	C37 H71 N O6 S	(2S,3R,4E,8E)-3-Hydroxy-2-[methyl(stearoyl)amino]-4,8-octadecadien-1-yl hydrogen sulfate	0.00247368940324577	3.76226405371074	NA	4	NA	NA	NA	NA	NA	NA	NA	NA	NA	NA	588647	785079	426360	684538	411239	1.83833e+06	384782	356757	1.13615e+06	540989	3.6313e+06	484933	1.11146e+06	444763	1.81003e+06	2.34663e+06	339127	593131	546209	2.59788e+06	1.05292e+06
A3151	A3151_(2S,3R,4R,5S,6S)-2-(Hydroxymethyl)-6-phenylmethoxyoxane-3,4,5-triol	HMDB0243491	NEG	11.077	269.103	C13 H18 O6	(2S,3R,4R,5S,6S)-2-(Hydroxymethyl)-6-phenylmethoxyoxane-3,4,5-triol	3.39483610218849e-05	0.125683308738406	NA	4	HMDB	NA	HMDB0243491	Organic oxygen compounds	Carbohydrates and carbohydrate conjugates	Organooxygen compounds	Carbohydrates	NA	NA	NA	43920.6	229120	2.20822e+06	814204	2.69215e+06	464927	1.12255e+06	309061	353071	1.96028e+06	38849.4	791855	535316	414177	25934.7	66312.6	56921.1	589327	741709	38143	674802
C4315	C4315_(2S,3R,4R,6R,7S,8R,9R)-1,2,3,4,6,7,8,9-Octahydroxydecan-5-one	HMDB0255321	POS	0.666	285.119	C10 H20 O9	(2S,3R,4R,6R,7S,8R,9R)-1,2,3,4,6,7,8,9-Octahydroxydecan-5-one	0.00114781073011727	4.04001187155884	NA	4	HMDB	NA	HMDB0255321	Lipids and lipid-like molecules	Fatty alcohols	Fatty Acyls	Fatty acyls[FA]	NA	NA	NA	541379	1.16398e+06	1.8823e+06	738388	1.00648e+06	4.52826e+06	866994	868006	782034	223483	5.2522e+06	2.16252e+06	3.06455e+06	414592	365714	3.86503e+06	511599	1.63246e+06	955694	9.11003e+06	1.99678e+06
C3398	C3398_(2S,3R,4S,5R,6R)-6-Ethyloxane-2,3,4,5-tetrol	HMDB0242656	NEG	0.698	177.077	C7 H14 O5	(2S,3R,4S,5R,6R)-6-Ethyloxane-2,3,4,5-tetrol	-0.00011347360634772	-0.637191031791782	NA	4	HMDB	NA	HMDB0242656	Organic oxygen compounds	Carbohydrates and carbohydrate conjugates	Organooxygen compounds	Carbohydrates	NA	NA	NA	1.25257e+06	1.05895e+06	1.41718e+06	2.29237e+06	1.78858e+06	569903	1.72862e+06	1.43105e+06	1.59083e+06	1.0069e+06	150593	983522	1.73832e+06	2.0894e+06	1.45642e+06	364091	2.23287e+06	1.11513e+06	1.38997e+06	393546	1.30254e+06
C1888	C1888_(2S,3R,4S,5S,6R)-2-[4-(2-hydroxyethyl)phenoxy]-6-(hydroxymethyl)oxane-3,4,5-triol	PB00693	POS	0.712	336.165	C14 H20 O7	(2S,3R,4S,5S,6R)-2-[4-(2-hydroxyethyl)phenoxy]-6-(hydroxymethyl)oxane-3,4,5-triol	35.0373126712472	116743.993318573	16.7958764454391	3	Public	NA	NA	NA	NA	NA	NA	NA	NA	NA	8.10204e+06	5.55778e+06	4.77557e+06	5.96698e+06	4.25236e+06	745055	5.71807e+06	4.52292e+06	4.03886e+06	4.78722e+06	1.26605e+06	4.39879e+06	4.54423e+06	2.30114e+06	6.38039e+06	2.18224e+06	8.93046e+06	2.76803e+06	3.04054e+06	1.52686e+06	4.29028e+06
C146	C146_(2S,3R,4S,5S,6R)-2-[4-hydroxy-2-(3-methylbut-2-en-1-yl)phenoxy]-6-(hydroxymethyl)oxane-3,4,5-triol	1.152_363.13969	POS	1.152	363.14	C17 H24 O7	(2S,3R,4S,5S,6R)-2-[4-hydroxy-2-(3-methylbut-2-en-1-yl)phenoxy]-6-(hydroxymethyl)oxane-3,4,5-triol	21.980212282689	64618.7562332456	70.9809517281341	2	mzCloud	NA	NA	NA	NA	NA	NA	NA	NA	NA	7.50905e+07	6.2884e+07	1.77759e+07	6.67486e+07	5.78072e+07	3.2192e+06	7.0232e+07	4.28575e+07	5.18439e+07	8.32396e+07	1.20874e+07	6.95202e+07	5.42659e+07	1.43804e+07	7.3326e+07	2.03111e+07	8.14065e+07	1.88509e+07	3.8724e+07	939752	4.57755e+07
A3235	A3235_(2S,3S)-2-Amino-N-benzyl-3-methylpentanamide	HMDB0244500	POS	4.462	221.165	C13 H20 N2 O	(2S,3S)-2-Amino-N-benzyl-3-methylpentanamide	0.00013193629587249	0.599281232744369	NA	4	HMDB	NA	HMDB0244500	Organic acids and derivatives	Amino acids, peptides, and analogues	Carboxylic acids and derivatives	Amino acids, peptides, and analogues	NA	NA	NA	130296	337242	352828	1.62739e+06	569912	253434	115532	4.18725e+06	1.46987e+06	976822	376642	197748	392918	4.05529e+06	1.20002e+06	527603	151885	208933	180711	1.44391e+06	937812
A3868	A3868_(2S,3S)-3-[[3,5-Bis(trifluoromethyl)phenyl]methoxy]-2-phenylpiperidine	HMDB0253856	NEG	2.371	402.131	C20 H19 F6 N O	(2S,3S)-3-[[3,5-Bis(trifluoromethyl)phenyl]methoxy]-2-phenylpiperidine	0.00136655918333872	3.38981264614769	NA	4	HMDB	NA	HMDB0253856	Organoheterocyclic compounds	Phenylpiperidines	Piperidines	Phenylpiperidines	NA	NA	NA	1.7113e+06	2.01079e+06	3.81035e+06	2.53808e+06	1.76847e+07	1.44191e+06	1.44185e+06	3.42582e+06	2.04868e+06	482265	800964	1.73908e+06	1.1228e+06	5.73476e+06	7.28583e+06	2.60936e+06	785081	619872	4.68507e+06	7.26317e+06	3.46209e+06
C4998	C4998_(2S,3S)-3-hydroxy-4-methoxy-2-(2-phenylethyl)-2,3-dihydropyran-6-one	PB03364	POS	4.353	266.138	C14 H16 O4	(2S,3S)-3-hydroxy-4-methoxy-2-(2-phenylethyl)-2,3-dihydropyran-6-one	17.0261396364844	68624.7730630676	30.2193286001209	4	Public	NA	NA	NA	NA	NA	NA	NA	NA	NA	711939	688020	430477	914140	737147	347445	559237	545200	684717	646689	275451	608445	560332	4.3481e+06	883476	239163	501773	474524	576048	980943	785663
C3936	C3936_(2S,3S)-N-(2-Methoxy-5-(trifluoromethoxy)benzyl)-2-phenylpiperidin-3-amine	HMDB0250509	POS	5.452	381.18	C20 H23 F3 N2 O2	(2S,3S)-N-(2-Methoxy-5-(trifluoromethoxy)benzyl)-2-phenylpiperidin-3-amine	0.00173666125004956	4.56810358438285	NA	4	HMDB	NA	HMDB0250509	Organoheterocyclic compounds	Phenylpiperidines	Piperidines	Phenylpiperidines	NA	NA	NA	1.6238e+06	1.18606e+06	63765.9	1.36983e+06	886866	172551	704627	306995	732367	928294	407587	804980	323602	288634	1.76054e+06	277330	543433	83243.7	435019	501477	670050
A3142	A3142_(2S,3S,4R,5R)-5-(6-Aminopurin-9-yl)-N-cyclopropyl-3,4-dihydroxyoxolane-2-carboxamide	HMDB0242669	NEG	8.935	319.115	C13 H16 N6 O4	(2S,3S,4R,5R)-5-(6-Aminopurin-9-yl)-N-cyclopropyl-3,4-dihydroxyoxolane-2-carboxamide	-0.00096757761525623	-3.02251540750513	NA	4	HMDB	NA	HMDB0242669	Nucleosides, nucleotides, and analogues	NA	Purine nucleosides	Purines and derivatives	NA	NA	NA	1.58494e+06	556337	376247	692667	3.34555e+06	1.69326e+06	238419	3.87929e+06	36448.1	69475	186814	1.08377e+06	49832.1	2.30945e+06	87078.3	172174	1.68101e+06	1.46979e+06	1.46216e+06	39526.7	1.05071e+06
C4933	C4933_(2S,3S,4S)-3,4-dihydroxy-6-methoxy-3-methyl-7-methylidene-2-pentyl-2,4-dihydropyrano[2,3-c]pyrrol-5-one	PB01755	POS	0.684	338.155	C15 H23 N O5	(2S,3S,4S)-3,4-dihydroxy-6-methoxy-3-methyl-7-methylidene-2-pentyl-2,4-dihydropyrano[2,3-c]pyrrol-5-one	39.9902195794925	134575.782433187	4.37600877059874	4	Public	NA	NA	NA	NA	NA	NA	NA	NA	NA	3.63828e+06	1.86521e+06	485582	399781	739525	8.78379e+06	351508	3.08372e+06	271993	218476	2.57677e+07	2.60325e+06	310618	4.36986e+07	4.30826e+06	1.74339e+07	2.63704e+06	1.31836e+06	4.58831e+06	1.88011e+07	7.06525e+06
C1515	C1515_(2S,3S,4S)-3,4-dihydroxy-6-methoxy-3-methyl-7-methylidene-2-pentyl-2H,3H,4H,5H,6H,7H-pyrano[2,3-c]pyrrol-5-one	6.031_280.15429	POS	6.031	280.154	C15 H23 N O5	(2S,3S,4S)-3,4-dihydroxy-6-methoxy-3-methyl-7-methylidene-2-pentyl-2H,3H,4H,5H,6H,7H-pyrano[2,3-c]pyrrol-5-one	-18.0106045227921	-60609.5995780027	31.3618045412145	3	mzCloud	NA	NA	NA	NA	NA	NA	NA	NA	NA	141464	219340	3.89272e+06	141805	214063	1.19929e+06	205789	302983	232676	201238	1.52746e+07	173411	259298	9.82447e+06	181060	102708	134152	920882	64221.6	83329.4	1.68848e+06
C4808	C4808_(2S,3S,4S)-4-[(6S)-6-Carboxyhepta-2,4-dien-2-yl]-3-(carboxymethyl)pyrrolidine-2-carboxylic acid	HMDB0260131	POS	3.223	312.145	C15 H21 N O6	(2S,3S,4S)-4-[(6S)-6-Carboxyhepta-2,4-dien-2-yl]-3-(carboxymethyl)pyrrolidine-2-carboxylic acid	0.00066381644802504	2.13351895988577	NA	4	HMDB	NA	HMDB0260131	Organic acids and derivatives	Amino acids, peptides, and analogues	Carboxylic acids and derivatives	Amino acids, peptides, and analogues	NA	NA	NA	2.15365e+06	3.73642e+06	3.19615e+06	4.26523e+06	2.21291e+06	211730	2.35947e+06	3.3578e+06	3.38707e+06	2.43355e+06	690183	5.5565e+06	3.82956e+06	1.30743e+06	6.04411e+06	1.00055e+06	6.29006e+06	2.26216e+06	2.42308e+06	720159	2.87189e+06
C4316	C4316_(2S,3S,4S,5R)-3,4,5-Trihydroxy-6-(5-methyl-2-propan-2-ylphenoxy)oxane-2-carboxylic acid	HMDB0255323	POS	4.693	327.145	C16 H22 O7	(2S,3S,4S,5R)-3,4,5-Trihydroxy-6-(5-methyl-2-propan-2-ylphenoxy)oxane-2-carboxylic acid	0.00124791788175571	3.82636619787725	NA	4	HMDB	NA	HMDB0255323	Lipids and lipid-like molecules	Terpene glycosides	Prenol lipids	Terpenoids	NA	NA	NA	751563	1.22639e+06	191774	177221	466444	55514.9	90711.6	105132	89191.3	159568	93517.8	672506	181376	1.26454e+06	515356	324544	1.53313e+06	685518	1.32098e+06	630064	526752
C4366	C4366_(2S,3S,4S,5S)-2-(5-Amino-7-methyl-2,6,7,9,11-pentazatricyclo[6.3.1.04,12]dodeca-1(12),3,5,8,10-pentaen-2-yl)-5-(hydroxymethyl)oxolane-3,4-diol	HMDB0255782	POS	0.693	321.129	C13 H16 N6 O4	(2S,3S,4S,5S)-2-(5-Amino-7-methyl-2,6,7,9,11-pentazatricyclo[6.3.1.04,12]dodeca-1(12),3,5,8,10-pentaen-2-yl)-5-(hydroxymethyl)oxolane-3,4-diol	-0.00147152607064527	-4.59674774503023	NA	4	HMDB	NA	HMDB0255782	Organic oxygen compounds	Carbohydrates and carbohydrate conjugates	Organooxygen compounds	Carbohydrates	NA	NA	NA	3.94184e+06	4.48822e+06	3.98227e+06	5.74533e+06	5.09732e+06	2.84356e+06	6.39418e+06	4.55742e+06	4.25444e+06	5.5122e+06	2.73307e+06	5.10684e+06	5.84235e+06	4.30325e+06	5.87919e+06	3.40936e+06	1.16376e+07	5.77224e+06	4.86667e+06	2.11259e+06	4.924e+06
C4587	C4587_(2S,3S,5R)-5-(6-Aminopurin-9-yl)-2-(2H-oxet-2-yl)oxolan-3-ol	HMDB0257938	POS	0.719	276.108	C12 H13 N5 O3	(2S,3S,5R)-5-(6-Aminopurin-9-yl)-2-(2H-oxet-2-yl)oxolan-3-ol	-0.00115580181159203	-4.20135981277017	NA	4	HMDB	NA	HMDB0257938	Organoheterocyclic compounds	Purines and purine derivatives	Imidazopyrimidines	Purines and derivatives	NA	NA	NA	1.10509e+07	7.74631e+06	9.14314e+06	748802	6.34934e+06	7.53706e+06	8.0805e+06	7.47383e+06	7.54762e+06	7.19541e+06	2.20979e+07	5.66293e+06	7.7589e+06	1.14481e+07	1.05252e+07	1.23304e+07	8.87845e+06	8.63786e+06	7.10712e+06	3.22405e+07	9.97801e+06
A4304	A4304_(2S,3S,5S,8S,9S,10S,13S,14S,17S)-17-Acetyl-2-(2,2-dimethylmorpholino)-3-hydroxy-10,13-dimethylhexadecahydro-11H-cyclopenta[a]phenanthren-11-one	HMDB0260132	NEG	1.505	444.312	C27 H43 N O4	(2S,3S,5S,8S,9S,10S,13S,14S,17S)-17-Acetyl-2-(2,2-dimethylmorpholino)-3-hydroxy-10,13-dimethylhexadecahydro-11H-cyclopenta[a]phenanthren-11-one	0.00031177265685755	0.700110506741223	NA	4	HMDB	NA	HMDB0260132	Lipids and lipid-like molecules	Pregnane steroids	Steroids and steroid derivatives	Steroids and derivatives	NA	NA	NA	403908	513812	180417	457829	188332	149601	205166	175801	3.11091e+06	320086	1.11967e+08	175708	515789	97599.9	4.49244e+06	6.24082e+07	168068	276094	432840	7.83139e+07	1.32277e+07
C1512	C1512_(2S,3S,9R,12R,13R,14S,15R,16R,17S)-3,12,13,15,16-pentahydroxy-2,6,14,17-tetramethyl-10-oxatetracyclo[7.7.1.0	5.948_379.17464	POS	5.948	379.175	C20 H28 O8	(2S,3S,9R,12R,13R,14S,15R,16R,17S)-3,12,13,15,16-pentahydroxy-2,6,14,17-tetramethyl-10-oxatetracyclo[7.7.1.0	-18.0110371615675	-45461.9342185717	46.8914353872287	3	mzCloud	NA	NA	NA	NA	NA	NA	NA	NA	NA	1.68827e+07	1.54933e+07	2.00966e+07	1.96223e+07	2.79607e+07	9.71401e+06	2.14335e+07	1.97185e+07	1.54306e+07	2.00069e+07	2.82722e+06	1.73016e+07	1.83901e+07	7.63529e+06	1.59914e+07	6.62157e+06	2.66286e+07	1.33375e+07	1.45907e+07	3.60834e+06	1.56646e+07
C3504	C3504_(2S,4R)-4-Aminopyrrolidine-2-carboxylic acid	HMDB0244734	NEG	0.646	175.072	C5 H10 N2 O2	(2S,4R)-4-Aminopyrrolidine-2-carboxylic acid	-0.00010540973917727	-0.810381435302206	NA	4	HMDB	NA	HMDB0244734	Organic acids and derivatives	Amino acids, peptides, and analogues	Carboxylic acids and derivatives	Amino acids, peptides, and analogues	NA	NA	NA	693998	704516	1.00969e+06	621045	710592	1.24205e+06	1.51875e+06	1.27946e+06	790883	726709	1.8026e+06	2.1062e+06	1.17367e+06	1.61996e+06	743111	3.2982e+06	1.47093e+06	1.69422e+06	717883	4.45622e+06	1.41903e+06
C2101	C2101_(2S,4S)-Pinnatanine	1.742_245.11313	POS	1.742	245.113	C10 H16 N2 O5	(2S,4S)-Pinnatanine	-6.94478905813867e-05	-0.284499000107528	NA	4	NA	NA	NA	NA	NA	NA	NA	NA	NA	NA	3.79517e+06	4.79178e+06	3.82118e+06	4.66434e+06	4.69599e+06	3.75233e+06	5.19853e+06	2.18451e+06	5.4336e+06	4.25299e+06	5.43374e+06	1.35702e+07	4.51869e+06	5.70773e+06	7.13734e+06	3.54907e+06	2.65402e+06	4.1576e+06	1.01923e+07	3.19223e+06	5.13516e+06
C421	C421_(2S,5aS,8aR)-2-[3-(4-Hydroxy-1-piperidinyl)-3-oxopropyl]-6-(1H-imidazol-2-ylmethyl)-1-methyloctahydropyrrolo[3,2-E][1,4]diazepin-5(2H)-one	6.486_449.25387	NEG	6.486	449.254	C20 H32 N6 O3	(2S,5aS,8aR)-2-[3-(4-Hydroxy-1-piperidinyl)-3-oxopropyl]-6-(1H-imidazol-2-ylmethyl)-1-methyloctahydropyrrolo[3,2-E][1,4]diazepin-5(2H)-one	46.0075578265014	113808.656510939	68.4136753719192	2	mzCloud	NA	NA	NA	NA	NA	NA	NA	NA	NA	1.32057e+06	1.54749e+06	1.58182e+06	1.44147e+06	1.33836e+06	887625	1.1931e+06	1.11725e+06	1.75642e+06	1.88729e+06	357019	825352	1.21699e+06	1.74123e+06	1.30796e+06	590209	1.5549e+06	1.33545e+06	1.26311e+06	346659	1.23051e+06
A1020	A1020_(2S,8R)-8-hydroxy-2-[(1S)-1-hydroxyheptyl]-3,4,5,6,7,8-hexahydro-2H-1-benzopyran-5-one	1.466_321.14458	POS	1.466	321.145	C16 H26 O4	(2S,8R)-8-hydroxy-2-[(1S)-1-hydroxyheptyl]-3,4,5,6,7,8-hexahydro-2H-1-benzopyran-5-one	37.954193748749	134502.004244835	51.72490597845	3	mzCloud	NA	NA	NA	NA	NA	NA	NA	NA	NA	6.34886e+06	5.9091e+06	691027	8.27128e+06	3.78113e+06	1.14639e+06	5.30979e+06	4.25638e+06	3.42021e+06	5.32613e+06	163864	4.27441e+06	3.98074e+06	2.7049e+06	3.57396e+06	646713	6.82983e+06	2.58521e+06	3.893e+06	398670	3.67558e+06
A3574	A3574_(2Z)-2-(3-Phenylpropoxyimino)butanoic acid	HMDB0249299	NEG	1.075	234.114	C13 H17 N O3	(2Z)-2-(3-Phenylpropoxyimino)butanoic acid	0.00018150935324001	0.771983252036495	NA	4	HMDB	NA	HMDB0249299	Benzenoids	NA	Benzene and substituted derivatives	Benzene and derivatives	NA	NA	NA	185022	339226	2.67752e+07	294995	2.84538e+06	4.68927e+06	115671	230123	232478	930574	425413	104591	248095	56208.6	6.47096e+06	129227	63666.2	117340	287447	169455	2.23552e+06
C914	C914_(2Z)-2-Octyl-2-pentenedioic acid	Reference7570	NEG	6.823	241.144	C13 H22 O4	(2Z)-2-Octyl-2-pentenedioic acid	-0.0002953841801343	-1.21983057356023	91.7233113097526	2	mzCloud	NA	NA	NA	NA	NA	NA	NA	NA	NA	204508	423370	915532	592139	3.52061e+06	1.29428e+06	975226	1.36975e+06	610988	918754	345074	516343	552060	329559	85524.3	273662	353491	733688	2.29517e+06	479117	839442
C4950	C4950_(2Z)-2-[(E)-6-(hydroxymethyl)-2,4,8,10-tetramethyldodec-2-enylidene]-4-methylpentanedioic acid	PB01949	NEG	9.832	395.28	C23 H40 O5	(2Z)-2-[(E)-6-(hydroxymethyl)-2,4,8,10-tetramethyldodec-2-enylidene]-4-methylpentanedioic acid	-0.00043051621446466	-1.08637323623825	54.4029442041213	4	Public	NA	NA	NA	NA	NA	NA	NA	NA	NA	287791	351404	650504	174083	846509	903853	265849	597147	554693	1.67072e+06	954630	665726	1.06728e+06	87272.2	224219	1.68153e+06	367062	1.46826e+06	1.55972e+06	305752	734200
A954	A954_(2Z)-3-methyl-5-(1,2,5,5-tetramethyl-7-oxo-1,2,3,4,4a,5,6,7-octahydronaphthalen-1-yl)pent-2-enoic acid	1.085_319.22667	POS	1.085	319.227	C20 H30 O3	(2Z)-3-methyl-5-(1,2,5,5-tetramethyl-7-oxo-1,2,3,4,4a,5,6,7-octahydronaphthalen-1-yl)pent-2-enoic acid	-8.21636425030192e-05	-0.258198017002317	44.0192537986156	3	mzCloud	NA	NA	NA	NA	NA	NA	NA	NA	NA	4.68936e+06	4.66702e+06	2.20553e+06	5.96564e+06	4.8108e+06	1.98136e+06	3.02381e+06	3.79419e+06	4.50083e+06	3.85215e+06	6.7199e+06	2.45235e+06	3.88207e+06	1.74961e+07	3.01228e+06	1.59741e+07	3.39741e+06	3.18471e+06	2.67177e+06	6.95851e+06	5.26199e+06
C182	C182_(2Z)-5-(1,2,4a,5-tetramethyl-7-oxo-1,2,3,4,4a,7,8,8a-octahydronaphthalen-1-yl)-3-methylpent-2-enoic acid	3.04_341.20736	POS	3.04	341.207	C20 H30 O3	(2Z)-5-(1,2,4a,5-tetramethyl-7-oxo-1,2,3,4,4a,7,8,8a-octahydronaphthalen-1-yl)-3-methylpent-2-enoic acid	21.9805873714372	69073.666879395	76.2938362233521	2	mzCloud	NA	NA	NA	NA	NA	NA	NA	NA	NA	143071	764208	189110	922325	129287	310133	300348	961793	382049	137146	150304	129766	3.50569e+06	985009	360476	872723	2.49336e+06	100439	336273	138277	665589
A2652	A2652_(2Z,4E)-4-Amino-6-oxohepta-2,4-dienedioate;	C21928	NEG	0.898	184.025	C7 H7 N O5	(2Z,4E)-4-Amino-6-oxohepta-2,4-dienedioate;	0.00017036699341588	0.920741302421728	NA	4	KEGG	C21928	NA	NA	NA	NA	NA	NA	NA	NA	7.28646e+06	8.12172e+06	2.70812e+07	1.61767e+07	5.50705e+07	2.28229e+06	1.591e+07	1.15571e+07	1.80305e+07	1.51163e+07	3.61783e+06	1.69481e+07	1.89695e+07	6.20135e+06	5.99659e+06	8.97895e+06	1.87926e+07	1.39393e+07	1.02193e+07	1.31256e+06	1.40804e+07
A3324	A3324_(2Z,6Z,10Z)-2,6,9,9-Tetramethylcycloundeca-2,6,10-trien-1-one	HMDB0245523	POS	12.717	219.174	C15 H22 O	(2Z,6Z,10Z)-2,6,9,9-Tetramethylcycloundeca-2,6,10-trien-1-one	0.00012710414065964	0.582600038682116	NA	4	HMDB	NA	HMDB0245523	Lipids and lipid-like molecules	Sesquiterpenoids	Prenol lipids	Terpenoids	NA	NA	NA	67059.9	64754.4	26157.6	47514.9	38276.5	123287	113566	44560	129611	51444.1	317214	58032.8	78203.5	722205	188913	208564	32709.3	1.1055e+06	35141.5	244393	184856
A3135	A3135_(2r,3r,5s,6r)-2,6-Bis(hydroxymethyl)piperidine-3,4,5-triol	HMDB0242543	POS	3.487	194.103	C7 H15 N O5	(2r,3r,5s,6r)-2,6-Bis(hydroxymethyl)piperidine-3,4,5-triol	0.00038907581938474	2.01494484139533	NA	4	HMDB	NA	HMDB0242543	Organoheterocyclic compounds	NA	Piperidines	Piperidines	NA	NA	NA	2.79384e+06	2.48284e+06	2.28779e+06	2.83501e+06	2.20656e+06	710645	2.85063e+06	1.72051e+06	1.60068e+06	1.97202e+06	83394.7	1.80266e+06	1.44382e+06	2.93289e+06	2.0567e+06	273753	3.31261e+06	1.27918e+06	1.84995e+06	225331	1.83604e+06
C469	C469_Clinoposaponin X	7.584_795.45637	NEG	7.584	795.456	C42 H68 O14	Clinoposaponin X	0.00274050503207945	3.4408531667033	60.5974372007493	2	mzCloud	NA	NA	NA	NA	NA	NA	NA	NA	NA	9.92126e+06	7.70224e+06	866132	1.9167e+06	1.33247e+06	198611	1.60706e+06	858617	523322	1.2033e+06	75405.5	3.31946e+06	1.17906e+06	5.56164e+06	6.96462e+06	1.1758e+06	6.94827e+06	1.36903e+06	3.24211e+06	408930	2.8187e+06
C4913	C4913_(3,4,5-trihydroxy-6-methyloxan-2-yl) 2-(methylamino)benzoate	PB01579	POS	3.556	315.154	C14 H19 N O6	(3,4,5-trihydroxy-6-methyloxan-2-yl) 2-(methylamino)benzoate	17.0257220398438	57302.2723047643	13.4970906580405	4	Public	NA	NA	NA	NA	NA	NA	NA	NA	NA	6.84649e+06	1.12728e+07	2.32752e+06	1.31314e+07	5.27788e+06	426339	4.94309e+06	3.35736e+06	1.29886e+07	5.51958e+06	8.20055e+06	5.14388e+06	3.86082e+06	2.02191e+06	5.36315e+06	1.99211e+06	2.3691e+06	2.04369e+06	4.03462e+06	450233	5.07855e+06
A4258	A4258_(3-(Tert-Butoxyimino-methyl)-4-chloro-phenyl)-thiocarbamic acid, O-isopropyl ester	HMDB0259385	POS	2.974	329.11	C15 H21 Cl N2 O2 S	(3-(Tert-Butoxyimino-methyl)-4-chloro-phenyl)-thiocarbamic acid, O-isopropyl ester	0.00143381018955324	4.37002386741504	NA	4	HMDB	NA	HMDB0259385	Benzenoids	Halobenzenes	Benzene and substituted derivatives	Benzene and derivatives	NA	NA	NA	2.80776e+06	6.09909e+06	252166	4.87146e+06	2.87469e+06	108248	3.04911e+06	647265	1.05777e+07	4.21185e+06	219126	2.49538e+06	3.88629e+06	465519	9.70708e+06	611806	1.51958e+06	2.509e+06	5.60368e+06	263157	3.139e+06
A4154	A4154_(3-Aminophenyl) nitrite	HMDB0257879	NEG	2.71	137.036	C6 H6 N2 O2	(3-Aminophenyl) nitrite	0.00017688671877635	1.28138921807585	NA	4	HMDB	NA	HMDB0257879	Benzenoids	Phenoxy compounds	Benzene and substituted derivatives	Benzene and derivatives	NA	NA	NA	2.42886e+06	1.75264e+06	3.50597e+06	1.63732e+06	2.02939e+06	9.35067e+06	4.58396e+06	5.28226e+06	1.79087e+06	6.62691e+06	8.48627e+06	5.45761e+06	5.64832e+06	9.06379e+06	3.85081e+06	6.61417e+06	4.12882e+06	2.00312e+06	5.53791e+06	1.19716e+07	5.08756e+06
A3608	A3608_(3-Chlorophenyl)hydrazonomalononitrile	HMDB0249720	NEG	0.73	203.013	C9 H5 Cl N4	(3-Chlorophenyl)hydrazonomalononitrile	0.00046428155835087	2.27566383276314	NA	4	HMDB	NA	HMDB0249720	Benzenoids	Phenylhydrazines	Benzene and substituted derivatives	Benzene and derivatives	NA	NA	NA	268182	300543	2.5373e+06	2.47593e+06	5.5377e+06	843700	1.01649e+06	2.99729e+06	1.60455e+06	258585	514527	390309	453301	2.64843e+06	334072	676230	367437	2.65561e+06	2.63914e+06	498582	1.4509e+06
A4305	A4305_(3-Fluorooxy-2-hexadecanoyloxypropyl) hexadecanoate	HMDB0260150	NEG	0.831	585.49	C35 H67 F O5	(3-Fluorooxy-2-hexadecanoyloxypropyl) hexadecanoate	-0.00015794309308603	-0.269298947644824	NA	4	HMDB	NA	HMDB0260150	Lipids and lipid-like molecules	Fatty acid esters	Fatty Acyls	Fatty acyls[FA]	NA	NA	NA	6.10189e+06	2.85133e+06	110547	1.6315e+06	1.28636e+07	5.43439e+07	3.60927e+06	6.813e+06	1.22338e+07	2.74685e+06	1.51099e+08	1.52258e+07	5.25475e+06	2.28134e+06	8.43961e+06	1.26141e+08	3.28017e+06	4.11772e+06	9.36927e+06	1.77894e+08	3.03204e+07
C1052	C1052_(3-nitrophenyl)(4-pyrimidin-2-ylpiperazino)methanone	1.542_314.12327	POS	1.542	314.123	C15 H15 N5 O3	(3-nitrophenyl)(4-pyrimidin-2-ylpiperazino)methanone	-0.0014923806966749	-4.7662003813634	31.5865494541569	3	mzCloud	NA	NA	NA	NA	NA	NA	NA	NA	NA	2.98939e+07	1.88525e+07	2.76314e+07	2.72633e+07	2.37966e+07	5.08536e+07	1.95193e+07	4.05046e+07	2.90889e+07	1.92915e+07	1.78282e+07	2.4284e+07	2.93279e+07	5.42262e+07	1.13119e+07	3.40104e+07	1.49148e+07	6.08906e+07	1.52409e+07	6.86937e+07	3.08712e+07
A3891	A3891_(3-{[3-(2-Amino-2-Oxoethyl)-1-Benzyl-2-Ethyl-1h-Indol-5-Yl]oxy}propyl)phosphonic Acid	HMDB0254234	NEG	0.818	429.159	C22 H27 N2 O5 P	(3-{[3-(2-Amino-2-Oxoethyl)-1-Benzyl-2-Ethyl-1h-Indol-5-Yl]oxy}propyl)phosphonic Acid	0.00061161532073583	1.42181312417497	NA	4	HMDB	NA	HMDB0254234	Organoheterocyclic compounds	N-alkylindoles	Indoles and derivatives	Indole and derivatives	NA	NA	NA	3.53759e+06	4.81649e+06	6.51608e+06	5.58561e+06	7.15661e+06	1.66651e+06	3.64184e+06	4.20444e+06	3.86299e+06	2.81166e+06	3.66631e+06	2.52203e+06	3.56913e+06	5.31184e+06	9.26863e+06	3.19028e+06	7.59454e+06	2.05488e+06	2.81585e+06	4.26191e+06	4.40276e+06
C4914	C4914_(3E,5S,7R,8R,11E,13S,15R,16R)-3,5,7,11,13,15-hexamethyl-8,16-bis(1,3-oxazol-5-ylmethyl)-1,9-dioxacyclohexadeca-3,11-diene-2,10-dione	PB01580	POS	9.151	516.307	C28 H38 N2 O6	(3E,5S,7R,8R,11E,13S,15R,16R)-3,5,7,11,13,15-hexamethyl-8,16-bis(1,3-oxazol-5-ylmethyl)-1,9-dioxacyclohexadeca-3,11-diene-2,10-dione	17.0263540200463	34170.7346638293	14.6635363895654	4	Public	NA	NA	NA	NA	NA	NA	NA	NA	NA	818501	307087	175623	126126	3.00879e+06	7.43258e+06	1.91021e+06	1.14033e+06	256991	646755	2.45467e+07	5.56145e+06	253798	2.33099e+06	100775	2.50361e+07	657765	2.21084e+06	879664	1.81375e+08	1.29388e+07
C1532	C1532_(3E,5S,8R,11E,13S,16R)-5,13-dihydroxy-8,16-dimethyl-1,9-dioxacyclohexadeca-3,11-diene-2,10-dione	6.303_295.15161	POS	6.303	295.152	C16 H24 O6	(3E,5S,8R,11E,13S,16R)-5,13-dihydroxy-8,16-dimethyl-1,9-dioxacyclohexadeca-3,11-diene-2,10-dione	-18.0129536218749	-57704.7350674364	54.9948813674814	3	mzCloud	NA	NA	NA	NA	NA	NA	NA	NA	NA	5.81641e+07	2.68089e+06	3.63147e+07	4.31364e+07	4.26124e+07	1.634e+07	4.79852e+07	2.9348e+07	3.03368e+07	3.53394e+07	3.38192e+06	3.72166e+07	3.25393e+07	1.64902e+07	5.23592e+07	1.15746e+07	4.37265e+07	2.6429e+07	3.61822e+07	3.43169e+06	3.02795e+07
C4855	C4855_(3R)-3-(3,4-dimethoxyphenyl)-8-hydroxy-3,4-dihydroisochromen-1-one	PB00424	NEG	5.009	299.092	C17 H16 O5	(3R)-3-(3,4-dimethoxyphenyl)-8-hydroxy-3,4-dihydroisochromen-1-one	-0.0003945633376361	-1.31477386024217	25.197640040685	4	Public	NA	NA	NA	NA	NA	NA	NA	NA	NA	1.55429e+06	998383	765461	1.26422e+06	1.06824e+06	328167	1.07438e+06	688243	708148	980476	158085	623188	555413	358687	1.35448e+06	273778	997822	515580	761243	302447	766537
A3155	A3155_(3R)-3-Hydroxy-N-[(3S)-2-oxooxolan-3-yl]butanamide	HMDB0243607	POS	4.15	188.092	C8 H13 N O4	(3R)-3-Hydroxy-N-[(3S)-2-oxooxolan-3-yl]butanamide	0.00027263804574317	1.45729928056991	NA	4	HMDB	NA	HMDB0243607	Organic acids and derivatives	Amino acids, peptides, and analogues	Carboxylic acids and derivatives	Amino acids, peptides, and analogues	NA	NA	NA	4.93777e+06	3.59499e+06	4.76358e+06	5.05879e+06	6.42812e+06	1.94213e+06	4.10297e+06	5.14932e+06	3.09875e+06	3.87956e+06	1.04042e+06	4.59226e+06	3.07907e+06	5.11886e+06	3.69985e+06	661963	5.38269e+06	3.26823e+06	5.70856e+06	1.71203e+06	3.861e+06
C1015	C1015_(3R)-4,4-Dimethyl-2-oxotetrahydro-3-furanyl beta-D-glucopyranoside	0.714_293.12377	POS	0.714	293.124	C12 H20 O8	(3R)-4,4-Dimethyl-2-oxotetrahydro-3-furanyl beta-D-glucopyranoside	0.00048052123440811	1.64496821392636	18.8192603926375	3	mzCloud	NA	NA	NA	NA	NA	NA	NA	NA	NA	2.5519e+06	3.25385e+06	2.62338e+06	944928	1.01016e+06	633967	874235	1.04038e+06	1.7103e+06	2.60155e+06	969718	394116	1.86699e+06	385360	1.78598e+06	626065	1.70688e+06	2.2862e+06	1.21383e+06	1.2992e+06	1.48895e+06
C298	C298_(3R)-8-hydroxy-3-(4-hydroxyphenyl)-3,4-dihydro-1H-2-benzopyran-1-one	4.658_274.10709	POS	4.658	274.107	C15 H12 O4	(3R)-8-hydroxy-3-(4-hydroxyphenyl)-3,4-dihydro-1H-2-benzopyran-1-one	17.026253945201	66489.6993959401	72.0035880774488	2	mzCloud	NA	NA	NA	NA	NA	NA	NA	NA	NA	4.26743e+06	4.76251e+06	7.86543e+06	7.57443e+06	3.59992e+06	774600	6.83852e+06	4.19709e+06	1.80512e+06	1.63976e+06	1.58584e+06	3.46949e+06	1.77849e+06	5.7219e+06	8.27883e+06	869503	6.45828e+06	2.89857e+06	5.12335e+06	2.93318e+06	4.12211e+06
A951	A951_(3R)-8-hydroxy-3-(4-methoxyphenyl)-3,4-dihydro-1H-2-benzopyran-1-one	1.082_269.08194	NEG	1.082	269.082	C16 H14 O4	(3R)-8-hydroxy-3-(4-methoxyphenyl)-3,4-dihydro-1H-2-benzopyran-1-one	-0.00019531060689814	-0.723133692573075	56.5153307447276	3	mzCloud	NA	NA	NA	NA	NA	NA	NA	NA	NA	2.49145e+06	1.66276e+06	1.12292e+06	5.18567e+06	1.21794e+06	443747	290280	1.06477e+06	2.59223e+06	974360	557731	283509	767649	277205	5.09372e+06	3.90841e+06	973294	1.09127e+06	1.04328e+06	980366	1.60113e+06
C1646	C1646_(3R)-N3-[(2R)-1-Amino-3-(1H-indol-3-yl)-1-oxo-2-propanyl]-N1-isopropyl-4-(4-piperidinylcarbonyl)-1,3-piperazinedicarboxamide	9.826_510.28273	NEG	9.826	510.283	C26 H37 N7 O4	(3R)-N3-[(2R)-1-Amino-3-(1H-indol-3-yl)-1-oxo-2-propanyl]-N1-isopropyl-4-(4-piperidinylcarbonyl)-1,3-piperazinedicarboxamide	-0.0006932740755019	-1.35592936092622	20.8640304830993	3	mzCloud	NA	NA	NA	NA	NA	NA	NA	NA	NA	27357.3	41961.8	21319.9	7447.14	229542	796536	133558	119605	7010.42	81844.6	1.89016e+06	473656	9984.33	35134.8	6465.09	1.69055e+06	109480	209494	277630	1.91571e+07	1.26629e+06
C2040	C2040_(3R,3aR,4R,4aR,7aR,8R,9aR)-3,4a,8-Trimethyl-2,5-dioxo-2,3,3a,4,4a,5,7a,8,9,9a-decahydroazuleno[6,5-b]furan-4-yl acetate	Reference7526	POS	2.638	324.18	C17 H22 O5	(3R,3aR,4R,4aR,7aR,8R,9aR)-3,4a,8-Trimethyl-2,5-dioxo-2,3,3a,4,4a,5,7a,8,9,9a-decahydroazuleno[6,5-b]furan-4-yl acetate	17.0261839631148	55614.4575371113	50.3743570677907	3	mzCloud	NA	NA	NA	NA	NA	NA	NA	NA	NA	2.88084e+07	2.14987e+07	1.71983e+07	2.52845e+07	1.88364e+07	4.11493e+06	2.13616e+07	1.06071e+07	1.6793e+07	2.0227e+07	2.13424e+06	1.63849e+07	1.97309e+07	6.60337e+06	3.10848e+07	7.56916e+06	2.77591e+07	9.20045e+06	1.30029e+07	1.42789e+06	1.59814e+07
A3154	A3154_(3R,4R)-3-Amino-1-hydroxy-4-methylpyrrolidin-2-one	HMDB0243603	NEG	12.024	129.067	C5 H10 N2 O2	(3R,4R)-3-Amino-1-hydroxy-4-methylpyrrolidin-2-one	0.00022920151553762	1.76208246585685	NA	4	HMDB	NA	HMDB0243603	Organic acids and derivatives	Amino acids, peptides, and analogues	Carboxylic acids and derivatives	Amino acids, peptides, and analogues	NA	NA	NA	4.70742e+06	4.58452e+06	3.50153e+06	4.96462e+06	4.8848e+06	2.06075e+06	4.9802e+06	1.02165e+06	3.29581e+06	6.97594e+06	336179	5.7766e+06	2.65436e+06	3.85232e+06	908533	246657	1.39093e+06	3.30407e+06	5.29096e+06	276193	3.2507e+06
C1610	C1610_(3R,4R)-4-Hydroxy-3-({4-[2-(4-morpholinyl)ethoxy]benzoyl}amino)-N-phenyl-1-azepanecarboxamide	9.236_465.25092	POS	9.236	465.251	C26 H34 N4 O5	(3R,4R)-4-Hydroxy-3-({4-[2-(4-morpholinyl)ethoxy]benzoyl}amino)-N-phenyl-1-azepanecarboxamide	-18.0092811226563	-37344.0582213777	50.3989222237195	3	mzCloud	NA	NA	NA	NA	NA	NA	NA	NA	NA	109216	138479	57557.6	48725.6	129444	252561	1.53813e+06	595818	1.0213e+06	65631.9	142437	787735	308335	2.29692e+06	70114.1	161869	873391	598851	65413.6	203946	473294
C1354	C1354_(3R,4R)-N-Ethyl-4-hydroxy-3-[(4-methoxybenzoyl)amino]-1-azepanecarboxamide	4.529_336.19153	POS	4.529	336.192	C17 H25 N3 O4	(3R,4R)-N-Ethyl-4-hydroxy-3-[(4-methoxybenzoyl)amino]-1-azepanecarboxamide	-0.00021766703002867	-0.649394664833551	56.4915306883537	3	mzCloud	NA	NA	NA	NA	NA	NA	NA	NA	NA	8.98516e+06	8.91839e+06	6.49921e+06	8.72854e+06	7.06637e+06	741264	7.07075e+06	3.17043e+06	5.86581e+06	7.0067e+06	1.10673e+06	5.37927e+06	6.5592e+06	2.53296e+06	1.09609e+07	2.18059e+06	8.62949e+06	1.63311e+06	5.46638e+06	109009	5.43052e+06
A4144	A4144_(3R,4R,5R)-3-Fluoro-5-(hydroxymethyl)oxolane-2,3,4-triol	HMDB0257780	NEG	0.723	335.081	C5 H9 F O5	(3R,4R,5R)-3-Fluoro-5-(hydroxymethyl)oxolane-2,3,4-triol	0.00066540147079763	3.95970008329321	NA	4	HMDB	NA	HMDB0257780	Organic oxygen compounds	Carbohydrates and carbohydrate conjugates	Organooxygen compounds	Carbohydrates	NA	NA	NA	5.01269e+07	8.14654e+07	1.51386e+08	1.64568e+08	7.00471e+07	8.29637e+06	6.58308e+07	1.74637e+08	1.40867e+08	5.03313e+07	1.4023e+07	2.31978e+07	5.78025e+07	1.86148e+08	2.07265e+08	1.11028e+08	3.8035e+08	7.56096e+07	5.89678e+07	2.33108e+07	1.04763e+08
A776	A776_(3R,4R,5R)-N-(3-Amino-3-oxopropyl)-3-{[(3-fluorophenyl)carbamoyl]amino}-4,5-dihydroxy-1-cyclohexene-1-carboxamide	Reference8928	POS	11.882	363.145	C17 H21 F N4 O5	(3R,4R,5R)-N-(3-Amino-3-oxopropyl)-3-{[(3-fluorophenyl)carbamoyl]amino}-4,5-dihydroxy-1-cyclohexene-1-carboxamide	-18.0114789432618	-47379.9763200497	68.4732966493915	2	mzCloud	NA	NA	NA	NA	NA	NA	NA	NA	NA	20084.8	19648.4	175706	18051.4	15955	40522.5	1.29934e+07	16810.8	29128.1	20943	75566.8	19255.9	26820.3	1.03056e+06	43617.1	55150.1	18980.5	2.09325e+06	5.01485e+06	68989.3	1.08986e+06
A773	A773_(3R,4R,6R)-N-(4-Fluorobenzyl)-6-{[4-(1-hydroxycyclopentyl)-1H-1,2,3-triazol-1-yl]methyl}quinuclidine-3-carboxamide	Reference8884	NEG	0.735	408.222	C23 H30 F N5 O2	(3R,4R,6R)-N-(4-Fluorobenzyl)-6-{[4-(1-hydroxycyclopentyl)-1H-1,2,3-triazol-1-yl]methyl}quinuclidine-3-carboxamide	-18.0095578522025	-42153.4202467924	62.0581373846711	2	mzCloud	NA	NA	NA	NA	NA	NA	NA	NA	NA	696456	330694	594000	82050.3	546813	3.18009e+06	171361	400407	682540	229782	4.17925e+07	729996	382601	390158	1.2975e+06	9.6197e+06	496025	418766	1.46112e+06	6.5593e+07	6.45478e+06
C2073	C2073_(3R,4R,6R)-N-Allyl-6-{[4-(3-hydroxyphenyl)-1H-1,2,3-triazol-1-yl]methyl}-N-methylquinuclidine-3-carboxamide	Reference8919	NEG	9.452	426.214	C21 H27 N5 O2	(3R,4R,6R)-N-Allyl-6-{[4-(3-hydroxyphenyl)-1H-1,2,3-triazol-1-yl]methyl}-N-methylquinuclidine-3-carboxamide	46.0044167226465	120677.934292949	30.676492885294	3	mzCloud	NA	NA	NA	NA	NA	NA	NA	NA	NA	35718.1	26506.9	4229.04	12302.8	37645.9	2.37063e+06	55994.6	86832.7	21863.8	34027.2	5.28437e+06	235746	26819.5	75218.5	21971.1	918231	77178.6	86901.1	54585.2	3.60881e+06	653779
C216	C216_(3R,4R,6R)-N-Allyl-N-methyl-6-{[4-(2-pyridinyl)-1H-1,2,3-triazol-1-yl]methyl}quinuclidine-3-carboxamide	3.497_389.20362	POS	3.497	389.204	C20 H26 N6 O	(3R,4R,6R)-N-Allyl-N-methyl-6-{[4-(2-pyridinyl)-1H-1,2,3-triazol-1-yl]methyl}quinuclidine-3-carboxamide	21.9795346665605	60017.8203282682	64.9038659002097	2	mzCloud	NA	NA	NA	NA	NA	NA	NA	NA	NA	9.07724e+06	8.90981e+06	524711	8.10697e+06	5.59865e+06	1.66266e+06	5.43788e+06	2.86119e+06	5.06655e+06	8.03761e+06	3.24423e+06	8.93298e+06	5.12367e+06	1.02354e+06	1.12624e+07	3.4879e+06	7.77819e+06	1.55611e+06	1.47987e+06	2.01502e+06	5.05936e+06
A3157	A3157_(3R,4S)-2-[6-(Cyclohexylamino)purin-9-yl]-5-(hydroxymethyl)oxolane-3,4-diol	HMDB0243620	NEG	5.251	348.167	C16 H23 N5 O4	(3R,4S)-2-[6-(Cyclohexylamino)purin-9-yl]-5-(hydroxymethyl)oxolane-3,4-diol	-0.00095849990009355	-2.74504156616693	NA	4	HMDB	NA	HMDB0243620	Nucleosides, nucleotides, and analogues	NA	Purine nucleosides	Purines and derivatives	NA	NA	NA	1.29963e+06	1.27633e+06	1.76326e+06	1.48728e+06	1.42314e+06	754778	1.42057e+06	28128.4	640691	782137	67980.3	1.17827e+06	1.10273e+06	3.89983e+07	626103	170639	1.53917e+06	1.11555e+06	844675	118906	2.83192e+06
A1716	A1716_(3R,4S,6R)-6-{[4-(3-Aminophenyl)-1H-1,2,3-triazol-1-yl]methyl}-N-(4-fluorobenzyl)quinuclidine-3-carboxamide	Reference8883	NEG	9.303	469.194	C24 H27 F N6 O	(3R,4S,6R)-6-{[4-(3-Aminophenyl)-1H-1,2,3-triazol-1-yl]methyl}-N-(4-fluorobenzyl)quinuclidine-3-carboxamide	35.9784797298577	82857.141638284	37.4150916784599	3	mzCloud	NA	NA	NA	NA	NA	NA	NA	NA	NA	12078.4	14892.6	62707.5	15439.4	13616.1	388781	99447.6	9129.16	13164	19612.6	22989	11842.3	12049.4	5.99283e+06	15041.7	19390	8826.44	47253.8	58613.6	22383.1	343004
A3981	A3981_(3R,5R,6R)-1,2,3,5,6,7-Hexahydroxyheptan-4-one	HMDB0255327	NEG	8.512	191.056	C7 H14 O7	(3R,5R,6R)-1,2,3,5,6,7-Hexahydroxyheptan-4-one	0.00023833909688164	1.13454854306842	NA	4	HMDB	NA	HMDB0255327	Organic oxygen compounds	Carbohydrates and carbohydrate conjugates	Organooxygen compounds	Carbohydrates	NA	NA	NA	8.57745e+06	5.54505e+06	2.12746e+07	1.32157e+07	7.49999e+06	6.92599e+06	1.02602e+07	1.91691e+07	4.52844e+06	7.11553e+06	4.17533e+06	1.10856e+07	1.29107e+07	2.64266e+07	3.51451e+06	3.15884e+06	1.6078e+07	1.5828e+07	8.54366e+06	3.41139e+06	1.04622e+07
C1601	C1601_(3R,5S)-1-[(1-Methyl-1H-indol-3-yl)methyl]-5-(3-phenyl-1,2,4-oxadiazol-5-yl)-3-pyrrolidinol	9.122_357.17303	POS	9.122	357.173	C22 H22 N4 O2	(3R,5S)-1-[(1-Methyl-1H-indol-3-yl)methyl]-5-(3-phenyl-1,2,4-oxadiazol-5-yl)-3-pyrrolidinol	0.00194359037311642	5.19434525168596	20.1631969690957	3	mzCloud	NA	NA	NA	NA	NA	NA	NA	NA	NA	756344	241941	966750	603601	624440	3.64821e+06	803625	1.5188e+06	1.09823e+06	1.10662e+06	681439	579919	1.53168e+06	159743	286435	1.92365e+06	1.09262e+06	1.54003e+06	403952	1.28587e+06	1.0427e+06
C1080	C1080_(3R,5S)-5-(3-Cyclopropyl-1,2,4-oxadiazol-5-yl)-1-(tetrahydro-2H-pyran-4-yl)-3-pyrrolidinol	2.636_280.16532	POS	2.636	280.165	C14 H21 N3 O3	(3R,5S)-5-(3-Cyclopropyl-1,2,4-oxadiazol-5-yl)-1-(tetrahydro-2H-pyran-4-yl)-3-pyrrolidinol	-0.00024869000338867	-0.890856589337716	37.3146254342561	3	mzCloud	NA	NA	NA	NA	NA	NA	NA	NA	NA	7.45088e+06	5.42868e+06	1.23369e+07	7.77798e+06	7.15239e+06	9.01362e+06	7.06637e+06	7.69352e+06	2.78978e+06	3.89983e+06	2.7581e+06	2.88105e+06	1.02968e+07	9.33402e+06	7.68754e+06	2.63968e+06	6.93995e+06	3.70245e+06	4.29666e+06	2.44929e+06	6.17977e+06
A3549	A3549_(3R,5S,6R,7R,8S,9S,10S,13R,14S,17R)-6-Ethyl-17-((R)-4-hydroxybutan-2-yl)-10,13-dimethylhexadecahydro-1H-cyclopenta[a]phenanthrene-3,7-diol	HMDB0248866	NEG	0.757	391.322	C25 H44 O3	(3R,5S,6R,7R,8S,9S,10S,13R,14S,17R)-6-Ethyl-17-((R)-4-hydroxybutan-2-yl)-10,13-dimethylhexadecahydro-1H-cyclopenta[a]phenanthrene-3,7-diol	0.00050021813251532	1.27499643153448	NA	4	HMDB	NA	HMDB0248866	Lipids and lipid-like molecules	Bile acids, alcohols and derivatives	Steroids and steroid derivatives	Bile acids, alcohols and derivatives	NA	NA	NA	1.00892e+07	9.59277e+06	504615	1.67948e+07	3.38323e+06	1.97122e+06	7.88672e+06	5.71779e+06	1.05542e+07	3.0884e+06	3.84165e+06	3.90014e+06	1.2962e+07	6.03709e+06	2.407e+07	4.14653e+06	8.52113e+06	3.68826e+06	2.20848e+06	3.54857e+06	7.12534e+06
A3090	A3090_(3R,6'R)-3-Hydroxy-3',4'-didehydro-beta,gamma-carotene	HMDB0112260	POS	0.722	551.426	C40 H54 O	(3R,6'R)-3-Hydroxy-3',4'-didehydro-beta,gamma-carotene	0.00093842138403488	1.70492660866942	NA	4	HMDB	NA	HMDB0112260	Lipids and lipid-like molecules	Tetraterpenoids	Prenol lipids	Terpenoids	NA	NA	NA	2.18615e+06	3.09095e+06	2.07489e+06	4.9165e+06	1.96498e+06	524993	3.14747e+06	2.79058e+06	6.25531e+06	1.61755e+06	3.62536e+06	1.40532e+06	5.59304e+06	1.9992e+06	1.26152e+07	1.64543e+06	3.83998e+06	1.42591e+06	819914	2.09445e+06	3.18166e+06
C1636	C1636_(3R,6R)-6-{[4-(2-Hydroxyethyl)-1H-1,2,3-triazol-1-yl]methyl}-N-(3-pyridinylmethyl)quinuclidine-3-carboxamide	9.681_369.20442	NEG	9.681	369.204	C19 H26 N6 O2	(3R,6R)-6-{[4-(2-Hydroxyethyl)-1H-1,2,3-triazol-1-yl]methyl}-N-(3-pyridinylmethyl)quinuclidine-3-carboxamide	-2.45328244545817e-05	-0.0662670111871094	39.8295927201329	3	mzCloud	NA	NA	NA	NA	NA	NA	NA	NA	NA	2.4847e+06	1.77797e+06	578350	956781	3.3249e+06	7.57693e+06	2.35651e+06	2.10469e+06	1.59987e+06	1.03731e+06	8.86986e+06	3.45874e+06	1.45247e+06	2.72325e+06	1.8453e+06	7.96676e+06	2.75385e+06	2.71877e+06	2.34832e+06	2.06446e+07	3.92899e+06
C4876	C4876_(3R,7R,8R,8aS)-3,4'-dihydroxy-7'-(2-hydroxyethyl)-4,4,7,8a-tetramethylspiro[2,3,4a,5,6,7-hexahydro-1H-naphthalene-8,2'-3,8-dihydrofuro[2,3-e]isoindole]-6'-one	PB00791	POS	5.117	468.214	C25 H35 N O5	(3R,7R,8R,8aS)-3,4'-dihydroxy-7'-(2-hydroxyethyl)-4,4,7,8a-tetramethylspiro[2,3,4a,5,6,7-hexahydro-1H-naphthalene-8,2'-3,8-dihydrofuro[2,3-e]isoindole]-6'-one	37.9547955025058	88420.8755575802	17.3218715701722	4	Public	NA	NA	NA	NA	NA	NA	NA	NA	NA	1.55125e+06	1.36642e+06	1.34222e+06	1.3543e+06	1.04631e+06	606134	1.55022e+06	661275	1.66987e+06	990013	70272.1	913113	1.31405e+06	1.99488e+06	1.45305e+06	520910	1.32613e+06	1.16992e+06	931789	286770	1.10595e+06
A2087	A2087_(3R,7S)-iso-jasmonic acid	1.079_211.13325	POS	1.079	211.133	C12 H18 O3	(3R,7S)-iso-jasmonic acid	0.00040744734303643	1.93906574930208	NA	4	NA	NA	NA	NA	NA	NA	NA	NA	NA	NA	1.5051e+06	1.11522e+06	2.40427e+06	2.35704e+06	3.96003e+06	939706	1.99949e+06	3.30873e+06	1.26625e+06	2.4002e+06	638518	1.09513e+06	1.70538e+06	2.42306e+06	1.75544e+06	971710	1.69138e+06	1.85308e+06	1.91989e+06	878728	1.80942e+06
C2069	C2069_(3S)-3-(5-Methoxy-1H-benzimidazol-2-yl)-N-phenyl-1-pyrrolidinecarboxamide	Reference8832	POS	9.116	319.157	C19 H20 N4 O2	(3S)-3-(5-Methoxy-1H-benzimidazol-2-yl)-N-phenyl-1-pyrrolidinecarboxamide	-18.0092071648749	-53573.5387483099	24.9342090179561	3	mzCloud	NA	NA	NA	NA	NA	NA	NA	NA	NA	967754	1.23932e+06	1.04679e+06	937172	1.03904e+06	1.37502e+06	500756	973326	718561	1.17457e+06	891289	1.06854e+06	539942	853009	1.60506e+06	1.27512e+06	363565	930939	1.47561e+06	917826	994661
C4936	C4936_(3S,3'R,3'aS,6'S,6aS,6bS,7'aR,9R,11bR)-3-hydroxy-3',6',10,11b-tetramethylspiro[1,2,3,4,6,6a,6b,7,8,11a-decahydrobenzo[a]fluorene-9,2'-3a,4,5,6,7,7a-hexahydro-3H-furo[3,2-b]pyridine]-11-one	PB01774	POS	7.184	448.281	C27 H39 N O3	(3S,3'R,3'aS,6'S,6aS,6bS,7'aR,9R,11bR)-3-hydroxy-3',6',10,11b-tetramethylspiro[1,2,3,4,6,6a,6b,7,8,11a-decahydrobenzo[a]fluorene-9,2'-3a,4,5,6,7,7a-hexahydro-3H-furo[3,2-b]pyridine]-11-one	21.9808722446851	51684.068527674	9.47914395388805	4	Public	NA	NA	NA	NA	NA	NA	NA	NA	NA	1.78207e+06	1.60706e+06	3.84473e+06	2.13418e+06	1.23406e+06	792419	2.22315e+06	2.37168e+06	1.8306e+06	911333	525371	1.41582e+06	2.20817e+06	4.61506e+06	1.54181e+06	594170	3.59726e+06	1.38518e+06	1.93368e+06	256230	1.8402e+06
C1477	C1477_(3S,3aR,4S,4aR,7aR,8R,9aR)-3,4a,8-trimethyl-2,5-dioxo-2H,3H,3aH,4H,4aH,5H,7aH,8H,9H,9aH-azuleno[6,5-b]furan-4-yl (2Z)-2-methylbut-2-enoate	5.471_369.16571	POS	5.471	369.166	C20 H26 O5	(3S,3aR,4S,4aR,7aR,8R,9aR)-3,4a,8-trimethyl-2,5-dioxo-2H,3H,3aH,4H,4aH,5H,7aH,8H,9H,9aH-azuleno[6,5-b]furan-4-yl (2Z)-2-methylbut-2-enoate	21.9804082668778	63494.5223468218	52.0113756216901	3	mzCloud	NA	NA	NA	NA	NA	NA	NA	NA	NA	955531	967647	112624	1.10691e+06	969210	51034	960593	464944	693772	1.06892e+06	73034.1	981734	656101	163783	1.73793e+06	195192	1.57886e+06	208797	448330	53545.6	672424
A3175	A3175_(3S,4R,5R)-1,3,4,5,6-Pentahydroxy-1-morpholin-4-ylhexan-2-one	HMDB0243864	POS	11.961	266.123	C10 H19 N O7	(3S,4R,5R)-1,3,4,5,6-Pentahydroxy-1-morpholin-4-ylhexan-2-one	-4.58316405911319e-05	-0.172873815062361	NA	4	HMDB	NA	HMDB0243864	Organoheterocyclic compounds	Morpholines	Oxazinanes	Morpholines	NA	NA	NA	1.41595e+06	862096	2.49295e+06	669351	804381	371932	230589	2.02846e+06	226424	2.02568e+06	51169.7	626237	2.15935e+06	5.27064e+06	29280.5	38103.8	556287	12782.4	13861.8	46823.9	996617
C436	C436_(3S,4aR,5R,6R)-3,6-dihydroxy-4a,5-dimethyl-3-(prop-1-en-2-yl)-2,3,4,4a,5,6,7,8-octahydronaphthalen-2-one	6.748_251.16441	POS	6.748	251.164	C15 H22 O3	(3S,4aR,5R,6R)-3,6-dihydroxy-4a,5-dimethyl-3-(prop-1-en-2-yl)-2,3,4,4a,5,6,7,8-octahydronaphthalen-2-one	0.0002408766401345	0.962902264414775	73.8272715993837	2	mzCloud	NA	NA	NA	NA	NA	NA	NA	NA	NA	1.74595e+07	1.34722e+07	1.2781e+07	1.54465e+07	1.3416e+07	5.06346e+06	1.37507e+07	9.18909e+06	1.06511e+07	1.08703e+07	2.00123e+06	1.00991e+07	9.52951e+06	3.74551e+06	1.84066e+07	3.47265e+06	1.55878e+07	6.80744e+06	9.78868e+06	2.29601e+06	1.01917e+07
A3861	A3861_(3S,8As)-7-hydroxy-3-(hydroxymethyl)-2,3,6,7,8,8a-hexahydropyrrolo[1,2-a]pyrazine-1,4-dione	HMDB0253728	POS	3.439	201.087	C8 H12 N2 O4	(3S,8As)-7-hydroxy-3-(hydroxymethyl)-2,3,6,7,8,8a-hexahydropyrrolo[1,2-a]pyrazine-1,4-dione	0.00043484138566896	2.17334077858562	NA	4	HMDB	NA	HMDB0253728	Organic acids and derivatives	Amino acids, peptides, and analogues	Carboxylic acids and derivatives	Amino acids, peptides, and analogues	NA	NA	NA	3.00851e+06	2.51752e+06	2.5906e+06	3.22012e+06	2.15883e+06	343688	2.57252e+06	2.90799e+06	1.66701e+06	1.79382e+06	296691	1.49714e+06	1.6456e+06	3.50706e+06	2.20531e+06	188424	3.33464e+06	1.40825e+06	2.99806e+06	282625	2.00722e+06
C4042	C4042_(3S,9S,10R,13R,17R)-17-((2R,5R,E)-5,6-Dimethylhept-3-en-2-yl)-10,13-dimethyl-2,3,4,9,10,11,12,13,14,15,16,17-dodecahydro-1H-cyclopenta[a]phenanthren-3-ol	HMDB0251915	POS	9.051	397.347	C28 H44 O	(3S,9S,10R,13R,17R)-17-((2R,5R,E)-5,6-Dimethylhept-3-en-2-yl)-10,13-dimethyl-2,3,4,9,10,11,12,13,14,15,16,17-dodecahydro-1H-cyclopenta[a]phenanthren-3-ol	0.00018713750000642	0.472164985168165	NA	4	HMDB	NA	HMDB0251915	Lipids and lipid-like molecules	Ergostane steroids	Steroids and steroid derivatives	Steroids and derivatives	NA	NA	NA	608368	734984	482609	542670	324125	107051	911276	439112	657382	535841	102247	465940	380602	985258	832499	91682	1.07649e+06	401861	635877	148590	523223
C1383	C1383_(3S,9aS)-3-benzyl-octahydro-1H-pyrido[1,2-a]pyrazin-1-one	4.67_245.16478	POS	4.67	245.165	C15 H20 N2 O	(3S,9aS)-3-benzyl-octahydro-1H-pyrido[1,2-a]pyrazin-1-one	-6.01669140678496e-05	-0.24642658322472	26.0001860163479	3	mzCloud	NA	NA	NA	NA	NA	NA	NA	NA	NA	6.75442e+06	7.32195e+06	5.20001e+06	1.00794e+07	7.72582e+06	4.15869e+06	6.28495e+06	3.72052e+06	5.52026e+06	4.75177e+06	574436	6.10269e+06	5.74533e+06	1.71113e+06	7.96752e+06	3.23912e+06	6.36546e+06	3.65031e+06	6.61581e+06	1.78154e+06	5.26356e+06
C4857	C4857_(3Z,5E)-4-hydroxy-6-(4-hydroxyphenyl)hexa-3,5-dien-2-one	PB00429	NEG	4.054	203.071	C12 H12 O3	(3Z,5E)-4-hydroxy-6-(4-hydroxyphenyl)hexa-3,5-dien-2-one	-0.00012424386716247	-0.608803864186143	5.56832942103264	4	Public	NA	NA	NA	NA	NA	NA	NA	NA	NA	24848.3	71476.1	80458.9	30484.9	38842.4	533367	49422.6	84757.9	43742.4	73735.2	3.74471e+06	91010.6	73720.5	47895.3	28126.2	988158	73964.7	105832	147300	1.29735e+06	381460
C2655	C2655_(3Z,6Z,9Z)-3,6,9-Dodecatrien-1-ol; (Z,Z,Z)-3,6,9-Dodecatrien-1-ol;	C08375	POS	9.202	181.159	C12 H20 O	(3Z,6Z,9Z)-3,6,9-Dodecatrien-1-ol; (Z,Z,Z)-3,6,9-Dodecatrien-1-ol;	0.00036593134478835	2.03124324270282	NA	4	KEGG	C08375	NA	FA Fatty acyls	Null	FA05 Fatty alcohols	Fatty acyls[FA]	NA	NA	NA	3.57898e+06	3.21573e+06	4.37261e+06	2.50975e+06	5.02341e+06	2.45456e+07	5.39289e+06	9.93858e+06	6.79035e+06	4.52436e+06	7.26896e+06	5.17192e+06	1.10618e+07	9.69054e+06	4.50815e+06	2.81038e+07	5.94053e+06	1.23233e+07	3.16399e+06	2.72858e+07	9.22055e+06
C1543	C1543_(3a,4	6.556_382.18630	POS	6.556	382.186	C19 H26 O8	(3a,4	-18.0103030788675	-47127.3096354091	45.729497420517	3	mzCloud	NA	NA	NA	NA	NA	NA	NA	NA	NA	1.33558e+07	9.94054e+06	1.10092e+07	1.06907e+07	8.70021e+06	5.12145e+06	1.06435e+07	5.90611e+06	7.47807e+06	9.59288e+06	1.57092e+06	7.50103e+06	6.82288e+06	9.57466e+06	1.26643e+07	3.87419e+06	1.36597e+07	1.26871e+06	2.73896e+06	2.34119e+06	7.72275e+06
C2037	C2037_(3aR,4S,6R,11aR)-6,9-Dihydroxy-6,10-dimethyl-3-methylene-2,7-dioxo-2,3,3a,4,5,6,7,8,9,11a-decahydrocyclodeca[b]furan-4-yl methacrylate	Reference7420	NEG	4.304	363.145	C19 H24 O7	(3aR,4S,6R,11aR)-6,9-Dihydroxy-6,10-dimethyl-3-methylene-2,7-dioxo-2,3,3a,4,5,6,7,8,9,11a-decahydrocyclodeca[b]furan-4-yl methacrylate	-0.00035029476327963	-0.961946022763978	33.45293442937	3	mzCloud	NA	NA	NA	NA	NA	NA	NA	NA	NA	8.34971e+06	6.58226e+06	9.61228e+06	7.04872e+06	6.31906e+06	3.82892e+06	8.52625e+06	5.52037e+06	4.63942e+06	6.59794e+06	1.08205e+06	6.54445e+06	7.1154e+06	8.46806e+06	8.67313e+06	2.8713e+06	1.37898e+07	6.25624e+06	5.465e+06	1.29568e+06	6.4293e+06
A1170	A1170_(3aR,4aS,5R,8S,9aR)-5-hydroxy-4a,8-dimethyl-3-methylidene-2H,3H,3aH,4H,4aH,5H,6H,8H,9H,9aH-azuleno[6,5-b]furan-2,6-dione	2.355_263.12756	POS	2.355	263.128	C15 H18 O4	(3aR,4aS,5R,8S,9aR)-5-hydroxy-4a,8-dimethyl-3-methylidene-2H,3H,3aH,4H,4aH,5H,6H,8H,9H,9aH-azuleno[6,5-b]furan-2,6-dione	-0.00015927378524338	-0.607635724070122	47.7828217190611	3	mzCloud	NA	NA	NA	NA	NA	NA	NA	NA	NA	41905.1	37446.1	30022	39235.4	32992.6	144016	37747.3	35459.1	58470.1	40004	101022	46252.9	57469.4	3.11885e+06	86563.6	82966.2	38724.1	41816.5	38091.7	104955	210700
C404	C404_(3aR,5S,7S,8aR,9aR)-7-hydroxy-5,8a-dimethyl-3-methylidene-2H,3H,3aH,5H,6H,7H,8H,8aH,9H,9aH-naphtho[2,3-b]furan-2-one	6.256_249.14864	POS	6.256	249.149	C15 H20 O3	(3aR,5S,7S,8aR,9aR)-7-hydroxy-5,8a-dimethyl-3-methylidene-2H,3H,3aH,5H,6H,7H,8H,8aH,9H,9aH-naphtho[2,3-b]furan-2-one	0.00011483425780056	0.462777794470377	71.7740579653762	2	mzCloud	NA	NA	NA	NA	NA	NA	NA	NA	NA	1.74343e+06	1.00167e+06	1.02959e+06	1.51986e+06	1.88626e+06	550455	1.26467e+06	866954	999370	857129	301503	1.18744e+06	607308	1.57208e+06	2.07528e+06	182089	1.10368e+06	509123	1.30825e+06	399625	1.04829e+06
C481	C481_(3aR,5aR,9bR)-3a-hydroxy-5a,9-dimethyl-3-methylidene-2H,3H,3aH,4H,5H,5aH,6H,7H,8H,9bH-naphtho[1,2-b]furan-2-one	8.207_249.14873	POS	8.207	249.149	C15 H20 O3	(3aR,5aR,9bR)-3a-hydroxy-5a,9-dimethyl-3-methylidene-2H,3H,3aH,4H,5H,5aH,6H,7H,8H,9bH-naphtho[1,2-b]furan-2-one	0.00021352509864414	0.860498218103321	73.8060881850951	2	mzCloud	NA	NA	NA	NA	NA	NA	NA	NA	NA	2.15472e+07	2.29702e+07	2.1554e+07	4.58046e+07	1.53534e+07	4.25898e+06	1.79015e+07	2.27118e+07	4.12094e+07	8.57718e+06	7.535e+06	3.70512e+06	2.88781e+07	272029	5.98428e+07	1.38935e+06	2.29571e+07	1.75022e+06	6.4081e+06	553706	1.7759e+07
C203	C203_(3aS,5aR,6R,9aS,9bS)-6-hydroxy-5a-methyl-3,9-dimethylidene-dodecahydronaphtho[1,2-b]furan-2-one	3.365_271.12944	POS	3.365	271.129	C15 H20 O3	(3aS,5aR,6R,9aS,9bS)-6-hydroxy-5a-methyl-3,9-dimethylidene-dodecahydronaphtho[1,2-b]furan-2-one	21.9809445057925	88582.3900776427	67.8945029563919	2	mzCloud	NA	NA	NA	NA	NA	NA	NA	NA	NA	9.21177e+06	2.10544e+07	6.5433e+06	1.01041e+07	7.56464e+06	5.80318e+06	1.30198e+07	5.30914e+06	7.95884e+06	1.40802e+07	6.96908e+06	1.11551e+07	6.99282e+06	7.90195e+06	9.6791e+06	4.55821e+06	1.577e+07	6.0694e+06	8.65723e+06	4.27301e+06	9.13376e+06
C285	C285_(3aS,5aS,9bR)-5a,9-dimethyl-3-methylidene-2H,3H,3aH,4H,5H,5aH,6H,7H,8H,9bH-naphtho[1,2-b]furan-2,5-dione	4.387_269.11348	POS	4.387	269.113	C15 H18 O3	(3aS,5aS,9bR)-5a,9-dimethyl-3-methylidene-2H,3H,3aH,4H,5H,5aH,6H,7H,8H,9bH-naphtho[1,2-b]furan-2,5-dione	21.9806054495185	89306.4596083994	75.0999807473811	2	mzCloud	NA	NA	NA	NA	NA	NA	NA	NA	NA	2.71892e+06	2.56907e+06	3.00955e+06	3.10625e+06	2.70099e+06	2.04461e+06	2.51564e+06	2.3247e+06	2.21864e+06	2.67905e+06	1.9691e+06	2.81218e+06	2.64366e+06	2.27392e+06	3.12313e+06	1.34542e+06	4.15684e+06	2.45127e+06	2.05367e+06	1.00067e+06	2.48586e+06
A1794	A1794_(3beta,5alpha,6beta,24R)-Stigmastane-3,5,6-triol	0.702_447.38469	NEG	0.702	447.385	C29 H52 O3	(3beta,5alpha,6beta,24R)-Stigmastane-3,5,6-triol	0.00031777347800243	0.708696250902057	NA	4	NA	NA	NA	NA	NA	NA	NA	NA	NA	NA	576689	780050	47201	1.04761e+06	139706	97277.3	460272	364421	696008	323711	8.86231e+06	328503	951714	102569	1.21058e+06	3.44966e+06	560146	188855	110080	1.22546e+07	1.6276e+06
A1051	A1051_(3beta,5xi,9xi)-3-[(6-Deoxy-beta-D-glucopyranosyl)oxy]urs-12-ene-27,28-dioic acid	1.762_631.38361	NEG	1.762	631.384	C36 H56 O9	(3beta,5xi,9xi)-3-[(6-Deoxy-beta-D-glucopyranosyl)oxy]urs-12-ene-27,28-dioic acid	-0.00155049296881771	-2.45178924938459	1.94887819496089	3	mzCloud	NA	NA	NA	NA	NA	NA	NA	NA	NA	77854.8	87791	79015.3	75573.6	58660.8	82899.8	57149	61535.5	260555	79682.4	433181	50397.5	496963	43846.2	1.46274e+07	329706	56308.9	71658.1	59560.4	479887	878480
C532	C532_(3beta,9xi)-3-(beta-D-Glucopyranosyloxy)-14-hydroxycard-20(22)-enolide	9.809_581.29992	NEG	9.809	581.3	C29 H44 O9	(3beta,9xi)-3-(beta-D-Glucopyranosyloxy)-14-hydroxycard-20(22)-enolide	46.0086670186721	85789.2837881268	66.7509595043298	2	mzCloud	NA	NA	NA	NA	NA	NA	NA	NA	NA	2.46587e+06	739096	1.57569e+06	2.56632e+06	985157	484189	2.96091e+06	1.87822e+06	415414	1.35481e+06	59952.4	832563	3.08075e+06	339512	1.23992e+06	360624	1.2856e+06	757164	927513	86536.4	1.21979e+06
C1628	C1628_(3beta,9xi)-3-(beta-D-Glucopyranosyloxy)-14-hydroxycarda-5,20(22)-dienolide	9.575_579.28424	NEG	9.575	579.284	C29 H42 O9	(3beta,9xi)-3-(beta-D-Glucopyranosyloxy)-14-hydroxycarda-5,20(22)-dienolide	46.0086346926562	86112.8742579136	51.0639886936223	3	mzCloud	NA	NA	NA	NA	NA	NA	NA	NA	NA	998781	210784	620181	1.08646e+06	422964	111548	904141	372453	76429.9	158438	13467.1	300537	209515	33236.9	369539	124122	370493	136781	254532	15622.5	339501
A3627	A3627_(3s)-3-(Benzyloxy)-L-Aspartic Acid	HMDB0250058	POS	3.956	240.087	C11 H13 N O5	(3s)-3-(Benzyloxy)-L-Aspartic Acid	3.68505376968642e-06	0.015413516159291	NA	4	HMDB	NA	HMDB0250058	Organic acids and derivatives	Amino acids, peptides, and analogues	Carboxylic acids and derivatives	Amino acids, peptides, and analogues	NA	NA	NA	4.10609e+06	3.0401e+06	3.0238e+06	3.76012e+06	4.04168e+06	715936	3.67578e+06	2.09394e+06	1.48668e+06	3.12934e+06	389940	3.08068e+06	2.26257e+06	3.62939e+06	1.76581e+06	243415	4.37793e+06	1.70416e+06	2.18999e+06	352404	2.45349e+06
C4866	C4866_(4,8,8-trimethyldecahydro-1,4-methanoazulen-9-yl)methanol	PB00615	POS	4.295	245.186	C15 H26 O	(4,8,8-trimethyldecahydro-1,4-methanoazulen-9-yl)methanol	21.9804726093361	98922.7466716306	14.9975313237152	4	Public	NA	NA	NA	NA	NA	NA	NA	NA	NA	1.09579e+07	7.46381e+06	3.48231e+07	1.47594e+07	8.86578e+06	4.4352e+06	3.00779e+07	3.22334e+07	1.72877e+07	1.82693e+07	5.50777e+06	4.31077e+07	4.24917e+07	6.36806e+07	1.13945e+07	5.66395e+07	1.82021e+07	8.46454e+07	5.20228e+06	2.26782e+07	2.66362e+07
C4270	C4270_(4-((5,6-Diphenylpyrazin-2-yl)(isopropyl)amino)butoxy)acetic acid	HMDB0254922	POS	5.952	420.227	C25 H29 N3 O3	(4-((5,6-Diphenylpyrazin-2-yl)(isopropyl)amino)butoxy)acetic acid	-0.00075130781249299	-1.79215260360738	NA	4	HMDB	NA	HMDB0254922	Organic nitrogen compounds	Amines	Organonitrogen compounds	Amines	NA	NA	NA	210456	701364	818595	485814	439866	48963.7	693319	1.17004e+06	880294	258207	55718.7	814831	649322	183602	188783	75425.8	524904	441314	103230	60418.6	440223
A1077	A1077_(4-Fluorophenyl){1-[(2-phenyl-1H-imidazol-4-yl)methyl]-4-piperidinyl}methanone	10.553_364.18042	POS	10.553	364.18	C22 H22 F N3 O	(4-Fluorophenyl){1-[(2-phenyl-1H-imidazol-4-yl)methyl]-4-piperidinyl}methanone	-0.00154716812500055	-4.26012099863263	55.5536500899753	3	mzCloud	NA	NA	NA	NA	NA	NA	NA	NA	NA	12941.6	11367.8	10356.8	10285.1	13089.9	40960.8	3.83272e+06	9586.2	14133.6	14471.8	34557.5	15751.5	12604.9	17590.8	19419.4	24356.9	9866.42	12155.8	14870	31655.1	208137
A3813	A3813_(4-Methoxyphenyl)-morpholin-4-yl-morpholin-4-ylsulfanyl-sulfidophosphanium	HMDB0253002	NEG	3.658	373.083	C15 H23 N2 O3 P S2	(4-Methoxyphenyl)-morpholin-4-yl-morpholin-4-ylsulfanyl-sulfidophosphanium	0.00130042945312425	3.4762589953409	NA	4	HMDB	NA	HMDB0253002	Benzenoids	Anisoles	Phenol ethers	Benzene and derivatives	NA	NA	NA	1.01424e+06	897395	2.27972e+06	1.17149e+06	686234	443743	289870	351845	857883	157929	1.54093e+06	455211	1.11307e+06	200321	2.70051e+06	1.16558e+06	499594	429217	297831	1.52612e+06	903937
A3392	A3392_(4-Sulfamoylphenyl) 4-(diaminomethylideneamino)benzoate	HMDB0246580	NEG	0.662	333.065	C14 H14 N4 O4 S	(4-Sulfamoylphenyl) 4-(diaminomethylideneamino)benzoate	-0.00096325678009634	-2.88336717023187	NA	4	HMDB	NA	HMDB0246580	Phenylpropanoids and polyketides	NA	Depsides and depsidones	Polyketides[PK]	NA	NA	NA	3.67046e+06	3.49279e+06	5.33523e+06	6.65187e+06	3.86965e+06	440356	3.39941e+06	5.91803e+06	5.21748e+06	1.8223e+06	741373	1.83404e+06	2.64555e+06	7.06887e+06	1.53619e+07	1.93394e+06	8.62078e+06	4.3836e+06	2.65326e+06	563066	4.2812e+06
A1137	A1137_(4-chlorophenyl)(phenyl)methanone O-(2,3,4,5,6-pentamethylbenzyl)oxime	13.5_392.17764	POS	13.5	392.178	C25 H26 Cl N O	(4-chlorophenyl)(phenyl)methanone O-(2,3,4,5,6-pentamethylbenzyl)oxime	7.09607514295385e-05	0.181406289961882	26.8130209006448	3	mzCloud	NA	NA	NA	NA	NA	NA	NA	NA	NA	174783	707750	681999	504200	1.05426e+06	223649	460727	191411	217102	639554	34660.4	3.30374e+06	1.01382e+06	1.84771e+06	77181	25583.1	509730	45065.6	1.23731e+06	32562.6	649140
C1562	C1562_(4-nitrophenyl)(2,3,4,5,6-pentamethylphenyl)methanone	7.033_298.14392	POS	7.033	298.144	C18 H19 N O3	(4-nitrophenyl)(2,3,4,5,6-pentamethylphenyl)methanone	0.00015124975226399	0.509024490895012	17.8866319398071	3	mzCloud	NA	NA	NA	NA	NA	NA	NA	NA	NA	392809	272179	1.78761e+06	431982	242049	2.79153e+06	429680	863676	182725	195568	2.45229e+07	381425	223891	818146	563392	635632	328503	1.28415e+06	456396	202417	1.85033e+06
C4922	C4922_(4-oxido-2,3,5,6,7,8-hexahydro-1H-pyrrolizin-4-ium-1-yl)methyl 2,3-dihydroxy-3-methylpentanoate	PB01693	POS	4.76	288.181	C14 H25 N O5	(4-oxido-2,3,5,6,7,8-hexahydro-1H-pyrrolizin-4-ium-1-yl)methyl 2,3-dihydroxy-3-methylpentanoate	0.00010867365676858	0.378425386624311	40.9195898347685	4	Public	NA	NA	NA	NA	NA	NA	NA	NA	NA	4.64665e+06	3.86601e+06	744411	4.31753e+06	4.68676e+06	2.84448e+06	4.43726e+06	3.35828e+06	3.41818e+06	4.26141e+06	481698	3.62313e+06	4.48849e+06	2.93411e+06	6.159e+06	1.67417e+06	4.41552e+06	2.60101e+06	4.67545e+06	1.13092e+06	3.43822e+06
C2941	C2941_(4-{4-[2-(gamma-L-Glutamylamino)ethyl]phenoxymethyl}furan-2-yl)methanamine; 4-[N-(gamma-L-Glutamyl)-p-(beta-aminoethyl)phenoxymethyl]-2-(aminomethyl)furan; APMF-Glu;	C21070	POS	5.357	376.186	C19 H25 N3 O5	(4-{4-[2-(gamma-L-Glutamylamino)ethyl]phenoxymethyl}furan-2-yl)methanamine; 4-[N-(gamma-L-Glutamyl)-p-(beta-aminoethyl)phenoxymethyl]-2-(aminomethyl)furan; APMF-Glu;	-0.0002044600780664	-0.544966132890977	NA	4	KEGG	C21070	NA	NA	NA	NA	NA	Energy metabolism	Methane metabolism	map01100 Metabolic pathways; map01240 Biosynthesis of cofactors;	247290	198432	786511	117624	139475	2.36558e+06	144490	1.0335e+06	242696	363473	6.61398e+06	1.2168e+06	1.11429e+06	1.01008e+06	206765	5.31445e+06	455056	2.68378e+06	145356	1.92936e+07	2.18466e+06
A3156	A3156_(4Ar,10bR)-rel-4-Propyl-2,3,4,4a,5,10b-hexahydrochromeno[4,3-b][1,4]oxazin-9-ol	HMDB0243617	NEG	2.187	248.129	C14 H19 N O3	(4Ar,10bR)-rel-4-Propyl-2,3,4,4a,5,10b-hexahydrochromeno[4,3-b][1,4]oxazin-9-ol	0.00016948645080106	0.68029556211723	NA	4	HMDB	NA	HMDB0243617	Organoheterocyclic compounds	1-benzopyrans	Benzopyrans	1-benzopyrans	NA	NA	NA	1.41182e+07	2.04035e+07	5.60307e+06	3.16298e+07	6.29341e+06	3.31965e+06	1.53628e+07	1.52419e+07	3.94815e+07	1.9384e+07	3.23475e+07	1.19895e+07	2.42573e+07	660595	5.05107e+07	1.66085e+07	9.06308e+06	1.46123e+07	1.06725e+07	2.08315e+07	1.81196e+07
C4906	C4906_(4E,6E)-2-(hydroxymethyl)-3-(3-methoxy-3-oxopropyl)deca-4,6-dienoic acid	PB01531	POS	5.226	302.196	C15 H24 O5	(4E,6E)-2-(hydroxymethyl)-3-(3-methoxy-3-oxopropyl)deca-4,6-dienoic acid	17.0266236367622	59918.6423377058	25.2700467769131	4	Public	NA	NA	NA	NA	NA	NA	NA	NA	NA	2.39604e+06	1.95391e+06	1.08854e+06	1.77749e+06	1.39545e+06	1.01607e+06	1.40072e+06	1.41001e+06	847258	1.4787e+06	449641	917496	1.11723e+06	759756	1.96052e+06	558853	1.86248e+06	542867	1.24981e+06	377279	1.22801e+06
C4130	C4130_(4E,7E,10E,13E)-Hexadeca-4,7,10,13-tetraenoic acid	HMDB0253125	POS	9.047	231.175	C16 H24 O2	(4E,7E,10E,13E)-Hexadeca-4,7,10,13-tetraenoic acid	5.07923438419766e-05	0.204661249518538	NA	4	HMDB	NA	HMDB0253125	Lipids and lipid-like molecules	Fatty acids and conjugates	Fatty Acyls	Fatty acyls[FA]	NA	NA	NA	3.92507e+06	3.47868e+06	2.54675e+06	2.19443e+06	1.95757e+06	1.15944e+06	3.91589e+06	2.44057e+06	3.40933e+06	1.92079e+06	2.41894e+06	2.89046e+06	1.89106e+06	4.40913e+06	3.46244e+06	1.50649e+06	3.46342e+06	2.69282e+06	3.4456e+06	2.20759e+06	2.76682e+06
C2046	C2046_(4R,4aS,8aS)-4-Hydroxy-4-(hydroxymethyl)-3,4a,8,8-tetramethyl-4a,5,6,7,8,8a-hexahydro-1(4H)-naphthalenone	Reference7743	POS	7.341	253.18	C15 H24 O3	(4R,4aS,8aS)-4-Hydroxy-4-(hydroxymethyl)-3,4a,8,8-tetramethyl-4a,5,6,7,8,8a-hexahydro-1(4H)-naphthalenone	18.0105927717309	71421.7037624509	65.7538299032503	3	mzCloud	NA	NA	NA	NA	NA	NA	NA	NA	NA	433038	812481	713428	218745	866844	531847	551256	203085	687343	620717	1.01232e+06	486037	645628	2.54132e+06	729299	236382	640622	575518	782669	593702	694114
A3624	A3624_(4R,6S)-6-[(E)-2-[2-(4-Fluoro-3-methylphenyl)-4,6-dimethylphenyl]ethenyl]-4-hydroxyoxan-2-one	HMDB0250011	NEG	11.407	353.157	C22 H23 F O3	(4R,6S)-6-[(E)-2-[2-(4-Fluoro-3-methylphenyl)-4,6-dimethylphenyl]ethenyl]-4-hydroxyoxan-2-one	0.00105705076310869	2.98464378527047	NA	4	HMDB	NA	HMDB0250011	Benzenoids	Biphenyls and derivatives	Benzene and substituted derivatives	Benzene and derivatives	NA	NA	NA	1.3804e+06	768930	423320	324673	61710.5	2.68679e+06	799750	2.24528e+06	663373	949844	93159.7	1.48658e+06	3.38141e+06	1.09244e+06	34727	403041	1.2677e+06	6.11542e+06	1.18427e+06	78939.9	1.27209e+06
A846	A846_(4S,5R,8R,12R)-12-hydroxy-12-(hydroxymethyl)-3,4-dimethyl-11-oxo-10-oxatricyclo[6.4.0.0	0.789_295.11746	POS	0.789	295.117	C15 H18 O6	(4S,5R,8R,12R)-12-hydroxy-12-(hydroxymethyl)-3,4-dimethyl-11-oxo-10-oxatricyclo[6.4.0.0	-0.00015490034155618	-0.526674249316769	50.8169219250186	3	mzCloud	NA	NA	NA	NA	NA	NA	NA	NA	NA	1.7864e+06	1.45436e+06	1.47717e+06	1.3492e+06	1.57773e+06	5.2961e+06	1.40267e+06	1.31025e+06	2.45566e+06	1.13947e+06	8.67289e+06	1.35577e+06	2.24924e+06	1.35919e+06	4.26904e+06	4.62287e+06	779642	788674	1.22633e+06	7.11496e+06	2.58438e+06
C283	C283_(4S,5S,8S,10R)-4,5,8-trihydroxy-10-methyl-3,4,5,8,9,10-hexahydro-2H-oxecin-2-one	4.335_217.10746	POS	4.335	217.107	C10 H16 O5	(4S,5S,8S,10R)-4,5,8-trihydroxy-10-methyl-3,4,5,8,9,10-hexahydro-2H-oxecin-2-one	0.00041865484286063	1.93732198844428	75.2270122981727	2	mzCloud	NA	NA	NA	NA	NA	NA	NA	NA	NA	1.85891e+06	1.93532e+06	4.17832e+06	4.75993e+06	8.38145e+06	2.20295e+06	3.90983e+06	4.08433e+06	4.12879e+06	3.95017e+06	680875	1.60437e+06	3.71421e+06	2.84478e+06	1.32111e+06	2.82243e+06	1.87284e+06	3.62341e+06	5.21595e+06	530700	3.18103e+06
C4852	C4852_(4S,5Z,6S)-4-(2-methoxy-2-oxoethyl)-5-[2-[(E)-3-phenylprop-2-enoyl]oxyethylidene]-6-[(2S,3R,4S,5S,6R)-3,4,5-trihydroxy-6-(hydroxymethyl)oxan-2-yl]oxy-4H-pyran-3-carboxylic acid	PB00378	POS	7.578	252.196	C15 H22 O2	(4S,5Z,6S)-4-(2-methoxy-2-oxoethyl)-5-[2-[(E)-3-phenylprop-2-enoyl]oxyethylidene]-6-[(2S,3R,4S,5S,6R)-3,4,5-trihydroxy-6-(hydroxymethyl)oxan-2-yl]oxy-4H-pyran-3-carboxylic acid	17.0266889435884	72713.2942494263	23.2039650098263	4	Public	NA	NA	NA	NA	NA	NA	NA	NA	NA	2.24671e+07	9.33576e+06	4.43328e+06	4.48429e+06	2.29477e+07	3.24914e+07	1.04079e+07	6.45546e+06	1.03608e+07	5.44718e+06	5.20597e+06	1.98437e+07	7.78555e+06	2.06153e+06	8.90532e+06	2.37516e+07	5.41161e+06	4.03033e+06	8.27443e+06	7.42874e+07	1.44194e+07
C196	C196_(4aR,5R,6R)-6-hydroxy-4a,5-dimethyl-3-(prop-1-en-2-yl)-2,4a,5,6,7,8-hexahydronaphthalen-2-one	3.278_255.13445	POS	3.278	255.134	C15 H20 O2	(4aR,5R,6R)-6-hydroxy-4a,5-dimethyl-3-(prop-1-en-2-yl)-2,4a,5,6,7,8-hexahydronaphthalen-2-one	21.9808474821052	94685.3112045419	71.4516914858704	2	mzCloud	NA	NA	NA	NA	NA	NA	NA	NA	NA	1.30758e+07	1.17752e+07	1.64055e+07	1.4113e+07	1.05198e+07	5.38543e+06	1.34116e+07	9.70791e+06	8.33701e+06	1.5092e+07	3.02396e+06	1.11207e+07	6.27869e+06	9.54253e+06	1.4126e+07	673697	1.31708e+07	8.88165e+06	1.43534e+07	6.35577e+06	1.02675e+07
C1268	C1268_(4aR,7aR)-6-(1,3-Benzodioxol-5-ylmethyl)-4-(2-methoxyethyl)hexahydropyrrolo[3,4-b][1,4]oxazin-3(2H)-one	4.068_335.16053	POS	4.068	335.161	C17 H22 N2 O5	(4aR,7aR)-6-(1,3-Benzodioxol-5-ylmethyl)-4-(2-methoxyethyl)hexahydropyrrolo[3,4-b][1,4]oxazin-3(2H)-one	0.00038153286175202	1.14179135991454	45.5398736556628	3	mzCloud	NA	NA	NA	NA	NA	NA	NA	NA	NA	5.69429e+06	6.33779e+06	1.02176e+06	7.51346e+06	4.99254e+06	1.15146e+06	5.09449e+06	4.60011e+06	6.71226e+06	4.18674e+06	1.48342e+06	4.62135e+06	5.33996e+06	3.45652e+06	5.76308e+06	1.53044e+06	5.94283e+06	2.41841e+06	4.17363e+06	233646	4.11341e+06
C1347	C1347_(4aR,7aS)-6-Isobutyl-4-(4-pyridinylmethyl)hexahydropyrrolo[3,4-b][1,4]oxazin-3(2H)-one	4.49_290.18628	POS	4.49	290.186	C16 H23 N3 O2	(4aR,7aS)-6-Isobutyl-4-(4-pyridinylmethyl)hexahydropyrrolo[3,4-b][1,4]oxazin-3(2H)-one	-2.42231249671931e-05	-0.0837651513932486	35.4035151442461	3	mzCloud	NA	NA	NA	NA	NA	NA	NA	NA	NA	126889	92260.5	168822	78445.2	56975.7	385835	133477	74731.5	52396.2	124031	3.00937e+06	77872	67345.7	33930.7	52402.6	247554	123022	118656	127833	205120	267848
C4928	C4928_(4aS)-6,7-dihydroxy-1,1,4a-trimethyl-3,4,10,10a-tetrahydro-2H-phenanthren-9-one	PB01726	POS	3.289	297.145	C17 H22 O3	(4aS)-6,7-dihydroxy-1,1,4a-trimethyl-3,4,10,10a-tetrahydro-2H-phenanthren-9-one	21.9806585688224	80175.4725596713	24.2248564884798	4	Public	NA	NA	NA	NA	NA	NA	NA	NA	NA	1.0437e+07	7.88067e+06	7.83685e+06	8.95829e+06	6.533e+06	8.95871e+06	1.04033e+07	6.01891e+06	6.17129e+06	7.06916e+06	4.75878e+06	7.45718e+06	9.65571e+06	5.6627e+06	8.19219e+06	2.91031e+06	1.22402e+07	5.61253e+06	7.48451e+06	1.17033e+06	7.27058e+06
A883	A883_(4aS,5R,6S,8aS)-5-[(3E)-5-methoxy-3-methyl-5-oxopent-3-en-1-yl]-5,6,8a-trimethyl-3,4,4a,5,6,7,8,8a-octahydronaphthalene-1-carboxylic acid	0.896_393.23165	NEG	0.896	393.232	C21 H32 O4	(4aS,5R,6S,8aS)-5-[(3E)-5-methoxy-3-methyl-5-oxopent-3-en-1-yl]-5,6,8a-trimethyl-3,4,4a,5,6,7,8,8a-octahydronaphthalene-1-carboxylic acid	46.008891259523	132122.113019425	19.5088972510746	3	mzCloud	NA	NA	NA	NA	NA	NA	NA	NA	NA	4.07864e+06	1.80281e+06	1.21964e+06	3.91979e+06	1.92263e+06	2.58977e+07	1.94861e+06	4.4706e+06	3.03971e+07	3.57748e+06	3.07382e+07	2.55067e+06	1.81564e+07	358943	1.28045e+07	2.45894e+07	3.23479e+06	2.78519e+06	529692	3.2763e+07	1.03873e+07
C1180	C1180_(4aS,9aR)-7-(1,3-Benzodioxol-5-ylmethyl)-2-(cyclopropylcarbonyl)decahydro-6H-pyrido[3,4-d]azepin-6-one	3.604_393.17650	POS	3.604	393.176	C21 H26 N2 O4	(4aS,9aR)-7-(1,3-Benzodioxol-5-ylmethyl)-2-(cyclopropylcarbonyl)decahydro-6H-pyrido[3,4-d]azepin-6-one	21.979970837671	59374.9559485016	46.7949866586715	3	mzCloud	NA	NA	NA	NA	NA	NA	NA	NA	NA	3.9229e+06	5.71842e+06	6.66429e+06	6.45386e+06	9.80841e+06	1.31524e+06	5.99767e+06	1.00194e+07	6.25094e+06	3.09934e+06	1.19799e+06	1.65629e+06	3.41494e+06	1.30115e+07	4.38511e+06	1.585e+06	9.94528e+06	3.97692e+06	5.43343e+06	892794	5.23749e+06
C1221	C1221_(4aS,9aR)-7-[2-(2,3-Dimethoxyphenyl)ethyl]-2-(methoxyacetyl)decahydro-6H-pyrido[3,4-d]azepin-6-one	3.81_427.21939	POS	3.81	427.219	C22 H32 N2 O5	(4aS,9aR)-7-[2-(2,3-Dimethoxyphenyl)ethyl]-2-(methoxyacetyl)decahydro-6H-pyrido[3,4-d]azepin-6-one	21.9809982609703	54377.3031487303	30.7158223603141	3	mzCloud	NA	NA	NA	NA	NA	NA	NA	NA	NA	89738.1	134478	98462.4	144378	93002.9	333515	76784.1	236612	131548	221768	343441	206213	206332	1.18508e+07	157498	246910	127979	107099	58760.1	1.02186e+06	794358
A1224	A1224_(5-Amino[1,2,3]triazolo[1,5-a]quinazolin-3-yl)(morpholino)methanone	3.264_299.12376	POS	3.264	299.124	C14 H14 N6 O2	(5-Amino[1,2,3]triazolo[1,5-a]quinazolin-3-yl)(morpholino)methanone	-0.00134348375826221	-4.50655295261614	5.78154632685885	3	mzCloud	NA	NA	NA	NA	NA	NA	NA	NA	NA	5.31632e+06	4.96662e+06	4.04956e+06	4.2255e+06	3.92478e+06	1.02249e+06	4.38679e+06	3.70755e+06	2.43887e+06	3.8146e+06	85032.7	3.38306e+06	3.19024e+06	5.38165e+06	2.11934e+06	225779	5.7837e+06	2.57142e+06	3.25986e+06	77730.7	3.19654e+06
C2784	C2784_(5-Phenyl-1,2,4-triazol-3-yl)urea; 3-Phenyl-5-ureido-1,2,4-triazole;	C15383	POS	3.992	204.088	C9 H9 N5 O	(5-Phenyl-1,2,4-triazol-3-yl)urea; 3-Phenyl-5-ureido-1,2,4-triazole;	-9.58750000279451e-05	-0.472102939217213	NA	4	KEGG	C15383	NA	NA	NA	NA	NA	NA	NA	NA	439048	1.10253e+06	223766	230372	196456	1.59572e+06	466212	529154	142618	315693	1.48223e+07	492225	584488	847013	313186	6.4915e+06	277060	718284	366099	2.89152e+06	1.65226e+06
C1631	C1631_(5-{[(2S)-2-{3-[6-(Dimethylamino)-3-pyridinyl]-1,2,4-oxadiazol-5-yl}-1-pyrrolidinyl]methyl}-2-furyl)methanol	9.638_352.17811	POS	9.638	352.178	C19 H23 N5 O3	(5-{[(2S)-2-{3-[6-(Dimethylamino)-3-pyridinyl]-1,2,4-oxadiazol-5-yl}-1-pyrrolidinyl]methyl}-2-furyl)methanol	-18.0092594543461	-48781.7733595136	26.9890614895717	3	mzCloud	NA	NA	NA	NA	NA	NA	NA	NA	NA	4.96369e+06	2.39717e+06	1.19627e+06	1.74391e+06	6.9234e+06	2.4966e+07	2.92766e+06	6.42924e+06	3.99444e+06	3.09681e+06	1.57197e+07	5.64762e+06	3.00576e+06	5.5015e+06	3.37702e+06	1.1143e+07	2.45303e+06	3.49003e+06	4.00464e+06	1.1431e+07	6.2206e+06
C464	C464_(5<U+03BE>)-12,13-Dihydroxypodocarpa-8,11,13-trien-7-one	7.456_275.16416	POS	7.456	275.164	C17 H22 O3	(5<U+03BE>)-12,13-Dihydroxypodocarpa-8,11,13-trien-7-one	-1.51777406358633e-05	-0.0553615135806032	72.8726642454216	2	mzCloud	NA	NA	NA	NA	NA	NA	NA	NA	NA	4.11707e+06	1.73397e+06	840860	2.13094e+06	904691	207554	1.47736e+06	1.28587e+06	1.46027e+06	624699	258268	874351	1.12568e+06	1.78558e+06	4.98356e+06	1.80122e+06	1.55621e+06	1.42214e+06	1.66317e+06	2.57996e+06	1.64167e+06
C521	C521_(5<U+03BE>,9<U+03BE>,16<U+03BE>)-17-Hydroxykauran-19-oic acid	9.384_338.26886	POS	9.384	338.269	C20 H32 O3	(5<U+03BE>,9<U+03BE>,16<U+03BE>)-17-Hydroxykauran-19-oic acid	17.0264203682373	53168.4939858733	61.9812851271946	2	mzCloud	NA	NA	NA	NA	NA	NA	NA	NA	NA	1.0893e+07	7.20434e+06	1.34657e+06	3.867e+06	7.59994e+06	4.80573e+07	5.2981e+06	4.17152e+06	7.12958e+06	5.59269e+06	5.93987e+07	1.24923e+07	2.53033e+06	1.67909e+06	8.56919e+06	2.27351e+07	3.84678e+06	3.97847e+06	1.84654e+07	9.3068e+07	1.63962e+07
C4859	C4859_(5R)-5-hydroxy-1-(4-hydroxy-3-methoxyphenyl)tetradecan-3-one	PB00496	NEG	8.725	349.238	C21 H34 O4	(5R)-5-hydroxy-1-(4-hydroxy-3-methoxyphenyl)tetradecan-3-one	-0.00037260149002804	-1.06382884931001	9.38736132606829	4	Public	NA	NA	NA	NA	NA	NA	NA	NA	NA	1.14036e+06	1.02582e+06	759407	936967	784341	231440	1.36704e+06	1.20732e+06	787066	377899	280922	676037	565927	1.38174e+06	1.1174e+06	346234	1.47454e+06	662777	675748	302827	805091
C4495	C4495_(5R,6R)-3-(2-Acetamidoethylsulfanyl)-6-ethyl-7-oxo-1-azabicyclo[3.2.0]hept-2-ene-2-carboxylic acid	HMDB0256886	POS	2.805	299.106	C13 H18 N2 O4 S	(5R,6R)-3-(2-Acetamidoethylsulfanyl)-6-ethyl-7-oxo-1-azabicyclo[3.2.0]hept-2-ene-2-carboxylic acid	0.00047156007815374	1.58189228745459	NA	4	HMDB	NA	HMDB0256886	Organoheterocyclic compounds	Beta lactams	Lactams	Beta lactams	NA	NA	NA	1.11558e+06	956130	990049	937350	599912	229129	873551	878949	574521	901664	575391	938263	831072	639946	879966	243180	2.54238e+06	402735	761404	436960	815407
A3521	A3521_(5R,6S)-6-[(1R)-1-Hydroxyethyl]-7-oxo-3-pyridin-3-yl-4-thia-1-azabicyclo[3.2.0]hept-2-ene-2-carboxylic acid	HMDB0248272	NEG	3.317	291.045	C13 H12 N2 O4 S	(5R,6S)-6-[(1R)-1-Hydroxyethyl]-7-oxo-3-pyridin-3-yl-4-thia-1-azabicyclo[3.2.0]hept-2-ene-2-carboxylic acid	0.00020050092541623	0.686525270142199	NA	4	HMDB	NA	HMDB0248272	Organic acids and derivatives	Amino acids, peptides, and analogues	Carboxylic acids and derivatives	Amino acids, peptides, and analogues	NA	NA	NA	2.00816e+06	3.63181e+06	4.07477e+06	3.97192e+06	1.29305e+06	2.72364e+06	8.51821e+06	1.02622e+07	3.27044e+06	3.82479e+06	6.81999e+06	1.52347e+07	4.68695e+06	1.53293e+06	1.39364e+06	4.27292e+06	1.07772e+07	5.97909e+06	1.44117e+06	5.57449e+06	5.06461e+06
A1540	A1540_(5S)-5-hydroxy-1,7-diphenylheptan-3-one	PB01443	POS	1.274	283.17	C19 H22 O2	(5S)-5-hydroxy-1,7-diphenylheptan-3-one	0.00048227953129753	1.70922932826325	48.6054022280932	3	Public	NA	NA	NA	NA	NA	NA	NA	NA	NA	24776.5	25246	1.90752e+06	28719.4	20100.5	25771	20107.3	19512.6	40377.6	21446.8	53189.4	17948.7	27642.4	19060.2	58267.2	55491.6	19803.2	19377.2	19913.7	60425.4	124235
A3461	A3461_(5S,6R)-Methyl 5,6,7-trihydroxyheptanoate	HMDB0247393	NEG	2.383	237.098	C8 H16 O5	(5S,6R)-Methyl 5,6,7-trihydroxyheptanoate	0.00040517441016163	2.10918733958746	NA	4	HMDB	NA	HMDB0247393	Lipids and lipid-like molecules	Fatty alcohols	Fatty Acyls	Fatty acyls[FA]	NA	NA	NA	1.75265e+06	84844.4	133357	75223.4	68722.4	88955.9	734652	1.12337e+06	2.83674e+06	90642.7	135684	3.48905e+06	336627	428655	117985	126087	950442	232559	98181.1	162537	653348
C1469	C1469_(5S,6S)-5-hydroxy-4-methoxy-6-(2-phenylethyl)-5,6-dihydro-2H-pyran-2-one	5.403_231.10180	POS	5.403	231.102	C14 H16 O4	(5S,6S)-5-hydroxy-4-methoxy-6-(2-phenylethyl)-5,6-dihydro-2H-pyran-2-one	-18.0103315796328	-72591.6117118197	45.3046015031838	3	mzCloud	NA	NA	NA	NA	NA	NA	NA	NA	NA	362231	186499	713391	507420	195491	40448.5	586739	751011	378332	32127.5	155302	842115	522491	1.48991e+06	728954	248751	707453	3.77883e+06	2.51715e+06	1.25641e+06	800053
A3353	A3353_(5Z,7E)-9,10-Seco-5,7,10(19)-cholestatriene	HMDB0245858	POS	0.717	369.351	C27 H44	(5Z,7E)-9,10-Seco-5,7,10(19)-cholestatriene	-0.00019467973538667	-0.528526529904267	NA	4	HMDB	NA	HMDB0245858	Lipids and lipid-like molecules	Vitamin D and derivatives	Steroids and steroid derivatives	Vitamins and derivatives	NA	NA	NA	3.04679e+06	4.49898e+06	1.56046e+06	3.98791e+06	4.5232e+06	5.60098e+06	3.52139e+06	2.78665e+06	1.6915e+06	4.3545e+06	4.00743e+07	2.87291e+06	7.72882e+06	2.95408e+06	7.90286e+06	2.55163e+07	2.96009e+06	4.98149e+06	4.23444e+06	5.03422e+07	9.25699e+06
C4186	C4186_(6AR,10AR)-3-(1,1-Dimethylbutyl)-6A,7,10,10A-tetrahydro-6,6,9-trimethyl-6H-dibenzo[B,D]pyran	HMDB0253747	POS	8.243	313.253	C22 H32 O	(6AR,10AR)-3-(1,1-Dimethylbutyl)-6A,7,10,10A-tetrahydro-6,6,9-trimethyl-6H-dibenzo[B,D]pyran	0.00012387445315198	0.396721574284694	NA	4	HMDB	NA	HMDB0253747	Organoheterocyclic compounds	1-benzopyrans	Benzopyrans	1-benzopyrans	NA	NA	NA	84366	81786	78718.1	73100.5	72915.9	125859	517106	74205.7	71484.6	78887.5	142520	75318.6	81853.5	73651.6	78017.1	104468	85681.1	2.05062e+06	73478.2	181071	210255
A1694	A1694_(6E)-10-Heptyl-5,8,9-trihydroxy-3,4,5,8,9,10-hexahydro-2H-oxecin-2-one	Reference8010	POS	0.941	318.227	C16 H28 O5	(6E)-10-Heptyl-5,8,9-trihydroxy-3,4,5,8,9,10-hexahydro-2H-oxecin-2-one	17.0263869913669	56718.007323638	57.7177963087968	3	mzCloud	NA	NA	NA	NA	NA	NA	NA	NA	NA	5.31964e+06	4.03657e+06	2.85164e+06	4.43142e+06	5.74086e+06	5.20674e+06	5.13778e+06	3.163e+06	2.50015e+06	4.35454e+06	743151	4.22981e+06	3.39469e+06	2.98951e+06	2.44029e+06	1.34919e+06	3.77979e+06	3.26028e+06	3.38586e+06	1.07351e+06	3.46942e+06
C4941	C4941_(6E)-2,6,10-trimethyldodeca-6,11-diene-2,3,10-triol	PB01824	POS	3.206	295.167	C15 H28 O3	(6E)-2,6,10-trimethyldodeca-6,11-diene-2,3,10-triol	37.9555160895604	148145.770969569	5.90259902598329	4	Public	NA	NA	NA	NA	NA	NA	NA	NA	NA	1.00852e+08	8.12391e+07	6.82053e+07	9.17438e+07	7.56079e+07	9.59536e+06	1.48992e+07	4.01685e+07	5.98712e+07	8.60231e+07	2.34588e+07	7.1869e+07	6.79537e+07	2.27894e+07	3.15014e+07	3.6372e+07	9.58292e+07	3.30347e+07	5.40392e+07	7.07299e+06	5.36063e+07
A765	A765_(6E)-4,5,8-Trihydroxy-10-(2-hydroxypentyl)-3,3-dimethyl-3,4,5,8,9,10-hexahydro-2H-oxecin-2-one	Reference7962	POS	1.076	317.196	C16 H28 O6	(6E)-4,5,8-Trihydroxy-10-(2-hydroxypentyl)-3,3-dimethyl-3,4,5,8,9,10-hexahydro-2H-oxecin-2-one	-1.66963183119151e-05	-0.0528049364282588	67.425532880198	2	mzCloud	NA	NA	NA	NA	NA	NA	NA	NA	NA	1.3436e+06	1.15144e+06	1.70226e+06	1.8352e+06	2.90948e+06	1.0308e+06	2.24487e+06	3.03162e+06	908134	2.03426e+06	227809	1.47036e+06	1.22393e+06	1.8936e+06	642829	184001	1.44419e+06	1.72717e+06	2.55678e+06	161215	1.48618e+06
C1258	C1258_(6E)-7-(2H-1,3-benzodioxol-5-yl)-1-(piperidin-1-yl)hept-6-en-1-one	4.01_316.18730	POS	4.01	316.187	C19 H25 N O3	(6E)-7-(2H-1,3-benzodioxol-5-yl)-1-(piperidin-1-yl)hept-6-en-1-one	-0.00342394592303208	-10.8633432151994	34.3496237125801	3	mzCloud	NA	NA	NA	NA	NA	NA	NA	NA	NA	1.23308e+06	1.24487e+06	7.28404e+06	2.26668e+06	1.55078e+06	1.75709e+06	4.38398e+06	5.05262e+06	1.11117e+06	2.11885e+06	427392	4.14531e+06	4.16569e+06	8.65829e+06	2.05464e+06	1.58214e+06	3.15711e+06	4.99385e+06	778455	552327	2.92592e+06
A3767	A3767_(6E,10E)-2,6,10-Trimethyldodeca-2,6,10-triene	HMDB0252171	NEG	0.966	205.196	C15 H26	(6E,10E)-2,6,10-Trimethyldodeca-2,6,10-triene	0.00013958589914864	0.676932896227655	NA	4	HMDB	NA	HMDB0252171	Lipids and lipid-like molecules	Sesquiterpenoids	Prenol lipids	Terpenoids	NA	NA	NA	292545	234004	714194	612884	710535	1.75929e+06	341704	154025	884410	239417	1.39543e+07	359452	344293	545677	353782	1.02612e+07	167720	228718	731991	3.69426e+07	3.49164e+06
A4168	A4168_(6R,7R)-6-Methoxy-3,7-dimethyl-8-oxo-5-thia-1-azabicyclo[4.2.0]oct-2-ene-2-carboxylic acid	HMDB0258050	NEG	1.404	242.049	C10 H13 N O4 S	(6R,7R)-6-Methoxy-3,7-dimethyl-8-oxo-5-thia-1-azabicyclo[4.2.0]oct-2-ene-2-carboxylic acid	0.00020182132422519	0.830347267275714	NA	4	HMDB	NA	HMDB0258050	Organic acids and derivatives	Amino acids, peptides, and analogues	Carboxylic acids and derivatives	Amino acids, peptides, and analogues	NA	NA	NA	4.80472e+06	5.39008e+06	6.2901e+06	9.86087e+06	6.40928e+06	3.05082e+06	6.19643e+06	8.79154e+06	4.72298e+07	1.8743e+07	1.38851e+07	4.11538e+06	1.83197e+07	1.28054e+07	1.79192e+07	9.3536e+06	4.46445e+06	4.97612e+06	4.97975e+06	8.40151e+06	1.07993e+07
A1097	A1097_(6S)-5-(4-Chlorobenzyl)-N-cyclohexyl-4,5,6,7-tetrahydro-1H-imidazo[4,5-c]pyridine-6-carboxamide	11.808_371.16644	NEG	11.808	371.166	C20 H25 Cl N4 O	(6S)-5-(4-Chlorobenzyl)-N-cyclohexyl-4,5,6,7-tetrahydro-1H-imidazo[4,5-c]pyridine-6-carboxamide	0.00203020356406114	5.45501880931193	33.3757026287732	3	mzCloud	NA	NA	NA	NA	NA	NA	NA	NA	NA	1.3073e+07	1.06547e+07	4.37785e+06	1.13431e+07	1.09779e+07	4.77458e+07	1.21099e+07	5.77353e+06	6.7667e+06	1.01229e+07	2.77529e+06	1.77213e+07	4.8086e+06	7.53988e+06	2.76039e+06	1.84578e+06	3.95863e+06	5.75543e+06	1.30359e+07	747322	9.69469e+06
A301	A301_(6S)-6-[(1S,2R)-1,2-dihydroxypentyl]-4-methoxy-5,6-dihydro-2H-pyran-2-one	3.876_253.10392	POS	3.876	253.104	C11 H18 O5	(6S)-6-[(1S,2R)-1,2-dihydroxypentyl]-4-methoxy-5,6-dihydro-2H-pyran-2-one	21.9812246641926	95522.6048130222	77.4722253350715	2	mzCloud	NA	NA	NA	NA	NA	NA	NA	NA	NA	5.49032e+07	5.55645e+07	3.00956e+07	6.59891e+07	2.91035e+07	7.38945e+06	3.85762e+07	2.71445e+07	1.11372e+08	2.37063e+07	2.8472e+07	2.62441e+07	4.85375e+07	4.37761e+07	3.62831e+08	5.94038e+07	5.14339e+07	1.59219e+07	2.92366e+07	3.53178e+07	5.7251e+07
A1348	A1348_(6S)-N-(4-Chlorobenzyl)-5-{[5-(hydroxymethyl)-2-furyl]methyl}-4,5,6,7-tetrahydro-1H-imidazo[4,5-c]pyridine-6-carboxamide	9.926_445.13148	NEG	9.926	445.131	C20 H21 Cl N4 O3	(6S)-N-(4-Chlorobenzyl)-5-{[5-(hydroxymethyl)-2-furyl]methyl}-4,5,6,7-tetrahydro-1H-imidazo[4,5-c]pyridine-6-carboxamide	46.0085395400211	114983.916373627	7.6477267969022	3	mzCloud	NA	NA	NA	NA	NA	NA	NA	NA	NA	2.85165e+06	2.06555e+06	189849	667761	9.4891e+06	4.40586e+07	1.63871e+06	1.57932e+06	238424	543921	1.67512e+07	2.74383e+06	621654	1.73229e+06	2.08396e+06	5.90655e+06	2.97787e+06	584322	7.48501e+06	1.91633e+07	6.16864e+06
C1358	C1358_(6S)-N5-isopropyl-N6-(4-methoxybenzyl)-1,4,6,7-tetrahydro-5H-imidazo[4,5-c]pyridine-5,6-dicarboxamide	4.538_372.20219	POS	4.538	372.202	C19 H25 N5 O3	(6S)-N5-isopropyl-N6-(4-methoxybenzyl)-1,4,6,7-tetrahydro-5H-imidazo[4,5-c]pyridine-5,6-dicarboxamide	-0.00082144697637431	-2.21297522802971	42.9588231820345	3	mzCloud	NA	NA	NA	NA	NA	NA	NA	NA	NA	183422	382120	1.23328e+06	226174	444740	121113	416544	371726	354934	539887	133626	315972	385613	8.08587e+06	174742	85141.5	573979	160942	1.26274e+06	48317	775044
C4586	C4586_(7,8-Dihydro-5-((E)-((a-(3-pyridyl)benzylidene)aminooxy)ethyl)-1-naphthyloxy)acetic acid	HMDB0257933	POS	6.33	443.195	C27 H26 N2 O4	(7,8-Dihydro-5-((E)-((a-(3-pyridyl)benzylidene)aminooxy)ethyl)-1-naphthyloxy)acetic acid	-0.00125239865423055	-2.83226838710995	NA	4	HMDB	NA	HMDB0257933	Benzenoids	Phenoxyacetic acid derivatives	Benzene and substituted derivatives	Benzene and derivatives	NA	NA	NA	1.59609e+06	736257	1.32452e+06	1.04413e+06	1.11533e+06	224900	844518	569598	606377	974851	50589.5	594980	611690	451455	1.14052e+06	134466	770920	269698	1.05163e+06	56842.3	708468
C2051	C2051_(7E)-12-Hydroxy-3-isobutyl-13-methoxy-4,5,8-trimethyl-3,3a,4,6a,9,10,11,12,13,14-decahydro-1H-cycloundeca[d]isoindole-1,15(2H)-dione	Reference7999	POS	9.209	440.277	C25 H39 N O4	(7E)-12-Hydroxy-3-isobutyl-13-methoxy-4,5,8-trimethyl-3,3a,4,6a,9,10,11,12,13,14-decahydro-1H-cycloundeca[d]isoindole-1,15(2H)-dione	21.9821877121973	52678.7075799246	22.6522238891932	3	mzCloud	NA	NA	NA	NA	NA	NA	NA	NA	NA	2.94258e+07	3.22844e+07	5.05874e+07	4.19515e+07	2.22746e+07	3.29146e+06	3.10867e+07	2.42243e+07	6.68393e+07	1.26234e+08	8.15985e+06	2.37328e+07	9.64706e+07	2.31255e+07	2.33446e+07	1.18319e+07	1.70977e+07	2.16413e+07	3.33212e+07	1.6746e+07	3.51836e+07
C4910	C4910_(7R,8R)-7,8-dihydroxy-3,5,7-trimethyl-8H-isochromen-6-one	PB01555	NEG	3.967	221.082	C12 H14 O4	(7R,8R)-7,8-dihydroxy-3,5,7-trimethyl-8H-isochromen-6-one	-0.00038594217841136	-1.7377799689681	14.9245228253961	4	Public	NA	NA	NA	NA	NA	NA	NA	NA	NA	422302	1.5222e+06	197671	1.2777e+06	1.53448e+06	238850	387627	152559	1.0927e+06	2.08787e+06	281330	384908	572145	192102	427910	343973	199087	429814	897702	108096	637551
A877	A877_(7R,8S)-7,8-Dihydroxy-3,7-dimethyl-6-oxo-7,8-dihydro-6H-isochromene-5-carbaldehyde	0.868_237.07604	POS	0.868	237.076	C12 H12 O5	(7R,8S)-7,8-Dihydroxy-3,7-dimethyl-6-oxo-7,8-dihydro-6H-isochromene-5-carbaldehyde	0.00029235821537554	1.23844667275711	32.107421837875	3	mzCloud	NA	NA	NA	NA	NA	NA	NA	NA	NA	433443	260294	595811	269053	421277	85340.4	479229	1.83686e+06	419935	168918	688077	211742	811736	2.0079e+06	411687	1.94553e+06	699801	1.18765e+06	173422	1.44554e+06	727662
C4812	C4812_(8R,9R,10S,13R,14S)-1,2,3,4,5,6,7,8,9,10,11,12,14,15,16,17-Hexadecahydrocyclopenta[a]phenanthrene-13-carbaldehyde	HMDB0260168	POS	8.821	261.221	C18 H28 O	(8R,9R,10S,13R,14S)-1,2,3,4,5,6,7,8,9,10,11,12,14,15,16,17-Hexadecahydrocyclopenta[a]phenanthrene-13-carbaldehyde	-9.11101562905969e-06	-0.0350135468823758	NA	4	HMDB	NA	HMDB0260168	Lipids and lipid-like molecules	Oxosteroids	Steroids and steroid derivatives	Steroids and derivatives	NA	NA	NA	728720	906058	400546	683599	933036	6.24034e+06	1.09259e+06	1.05889e+06	463043	575989	1.14896e+06	1.00917e+06	763643	706585	766747	6.91972e+07	1.02027e+06	1.18776e+06	1.38848e+06	3.4986e+06	4.68851e+06
C4813	C4813_(8R,9R,10S,13S,14S)-13-Methyl-1,4,5,6,7,8,9,10,11,12,14,15,16,17-tetradecahydrocyclopenta[a]phenanthrene	HMDB0260170	POS	8.942	245.226	C18 H28	(8R,9R,10S,13S,14S)-13-Methyl-1,4,5,6,7,8,9,10,11,12,14,15,16,17-tetradecahydrocyclopenta[a]phenanthrene	3.3765690659493e-05	0.138259827111617	NA	4	HMDB	NA	HMDB0260170	Lipids and lipid-like molecules	Estrane steroids	Steroids and steroid derivatives	Steroids and derivatives	NA	NA	NA	4.8393e+06	4.0732e+06	4.36377e+06	2.85362e+06	5.88418e+06	1.02114e+08	8.23668e+06	1.02245e+07	4.63714e+06	3.21319e+06	1.36891e+07	5.05768e+06	8.14513e+06	3.22356e+07	2.78392e+06	5.32617e+07	1.27152e+07	1.16737e+07	3.0831e+06	6.98356e+07	1.8146e+07
A4162	A4162_(8R,9S,10R,13S,14S,17S)-2,2,17-Trihydroxy-10,13-dimethyl-6,7,8,9,11,12,14,15,16,17-decahydro-1H-cyclopenta[a]phenanthren-3-one	HMDB0257961	NEG	1.073	319.192	C19 H28 O4	(8R,9S,10R,13S,14S,17S)-2,2,17-Trihydroxy-10,13-dimethyl-6,7,8,9,11,12,14,15,16,17-decahydro-1H-cyclopenta[a]phenanthren-3-one	0.00039596470003289	1.23662159395222	NA	4	HMDB	NA	HMDB0257961	Lipids and lipid-like molecules	Androstane steroids	Steroids and steroid derivatives	Steroids and derivatives	NA	NA	NA	1.73206e+06	3.59451e+06	1.5336e+06	3.14311e+06	2.05328e+06	881549	2.78791e+06	3.41588e+06	2.87388e+06	861707	2.49068e+06	1.65099e+06	1.3052e+06	2.38156e+06	8.16201e+06	5.5736e+06	3.23265e+06	2.18588e+06	1.7951e+06	1.45356e+06	2.65543e+06
C4549	C4549_(8R,9S,10S,13S,14S,17R)-17-Ethyl-3,17-dihydroxy-10,13-dimethyl-3,4,5,6,7,8,9,11,12,14,15,16-dodecahydro-1H-cyclopenta[a]phenanthren-2-one	HMDB0257629	POS	7.165	335.258	C21 H34 O3	(8R,9S,10S,13S,14S,17R)-17-Ethyl-3,17-dihydroxy-10,13-dimethyl-3,4,5,6,7,8,9,11,12,14,15,16-dodecahydro-1H-cyclopenta[a]phenanthren-2-one	-1.1741062053261e-05	-0.0351265045146228	NA	4	HMDB	NA	HMDB0257629	Lipids and lipid-like molecules	Pregnane steroids	Steroids and steroid derivatives	Steroids and derivatives	NA	NA	NA	71301.5	68630	99474.1	63471.4	62587.5	95157.5	1.90473e+06	190992	66406.9	213616	100104	341706	120909	67998.5	66230.4	380311	70613.8	1.58154e+06	121166	134214	291058
C4596	C4596_(8S,9R,10R,13S,14S)-10,13-Dimethyl-4,5,6,7,8,9,12,14,15,16-decahydrocyclopenta[a]phenanthrene-3,11,17-trione	HMDB0258027	POS	7.862	301.181	C19 H24 O3	(8S,9R,10R,13S,14S)-10,13-Dimethyl-4,5,6,7,8,9,12,14,15,16-decahydrocyclopenta[a]phenanthrene-3,11,17-trione	0.00070791631731026	2.35836464804694	NA	4	HMDB	NA	HMDB0258027	Lipids and lipid-like molecules	Androstane steroids	Steroids and steroid derivatives	Steroids and derivatives	NA	NA	NA	2.49209e+06	1.16815e+06	345137	2.072e+06	637951	386993	1.1026e+06	237879	837928	857379	454803	241082	1.07335e+06	1.58306e+06	1.19435e+06	363296	562765	229436	232905	539840	830650
A4307	A4307_(8S,9S,10R,13R,14S,17R)-17-[(2R,5R)-5,6-Dimethylheptan-2-yl]-10,13-dimethyl-4,5,6,7,8,9,11,12,14,15,16,17-dodecahydrocyclopenta[a]phenanthren-3-one	HMDB0260186	POS	0.71	399.362	C28 H46 O	(8S,9S,10R,13R,14S,17R)-17-[(2R,5R)-5,6-Dimethylheptan-2-yl]-10,13-dimethyl-4,5,6,7,8,9,11,12,14,15,16,17-dodecahydrocyclopenta[a]phenanthren-3-one	-1.73965716498969e-05	-0.0436710409124772	NA	4	HMDB	NA	HMDB0260186	Lipids and lipid-like molecules	Ergostane steroids	Steroids and steroid derivatives	Steroids and derivatives	NA	NA	NA	1.07023e+06	3.043e+06	1.22725e+06	1.44492e+06	935090	244932	618044	2.45749e+06	1.79653e+06	948900	1.19931e+06	589899	3.86265e+06	2.52734e+06	4.24146e+06	403954	1.93934e+06	4.04594e+06	992602	957028	1.7273e+06
C4815	C4815_(8S,9S,10R,13S,14S,17R)-1-Hexadecanoyl-11,17-dihydroxy-17-(2-hydroxyacetyl)-10,13-dimethyl-7,8,9,11,12,14,15,16-octahydro-6H-cyclopenta[a]phenanthren-3-one	HMDB0260191	POS	10.826	599.429	C37 H58 O6	(8S,9S,10R,13S,14S,17R)-1-Hexadecanoyl-11,17-dihydroxy-17-(2-hydroxyacetyl)-10,13-dimethyl-7,8,9,11,12,14,15,16-octahydro-6H-cyclopenta[a]phenanthren-3-one	-0.00186765723560711	-3.12096322591119	NA	4	HMDB	NA	HMDB0260191	Lipids and lipid-like molecules	Hydroxysteroids	Steroids and steroid derivatives	Steroids and derivatives	NA	NA	NA	59551.3	60412.2	404994	50992.2	58358.5	765951	49399.6	147190	55970.5	404487	3.53551e+06	650860	61019.9	184263	71460.1	1.2694e+06	465291	4.79051e+06	266234	4.98761e+06	916973
C4816	C4816_(8S,9S,10R,13S,14S,17S)-17-(1,1-Dihydroxyethyl)-10,13-dimethyl-1,2,6,7,8,9,11,12,14,15,16,17-dodecahydrocyclopenta[a]phenanthren-3-one	HMDB0260195	POS	7.223	315.232	C21 H32 O3	(8S,9S,10R,13S,14S,17S)-17-(1,1-Dihydroxyethyl)-10,13-dimethyl-1,2,6,7,8,9,11,12,14,15,16,17-dodecahydrocyclopenta[a]phenanthren-3-one	-0.00019794588115473	-0.595800547524042	NA	4	HMDB	NA	HMDB0260195	Lipids and lipid-like molecules	Pregnane steroids	Steroids and steroid derivatives	Steroids and derivatives	NA	NA	NA	217229	217030	164793	191302	148935	391640	6.89212e+06	218387	126592	148398	75007.8	1.58885e+06	277999	151649	213704	1.0608e+06	154774	3.1577e+06	327608	117658	792109
A2653	A2653_(8Z,11Z,14Z,17Z,20Z)-Hexacosapentaenoic acid; 8Z,11Z,14Z,17Z,20Z-Hexacosapentaenoic acid; (8Z,11Z,14Z,17Z,20Z)-Hexacosa-8,11,14,17,20-pentaenoic acid;	C21964	NEG	0.777	385.312	C26 H42 O2	(8Z,11Z,14Z,17Z,20Z)-Hexacosapentaenoic acid; 8Z,11Z,14Z,17Z,20Z-Hexacosapentaenoic acid; (8Z,11Z,14Z,17Z,20Z)-Hexacosa-8,11,14,17,20-pentaenoic acid;	0.0003717050335581	0.962172539909303	NA	4	KEGG	C21964	NA	FA Fatty acyls	FA0103 Unsaturated fatty acids	FA01 Fatty Acids and Conjugates	Fatty acyls[FA]	NA	NA	NA	187688	146693	74943	170148	277747	1.81216e+06	34800.4	282488	231274	150644	6.94326e+06	436891	275377	386456	281759	9.3405e+06	103841	91215.8	206299	9.2172e+06	1.53257e+06
A756	A756_(8aR,12S,12aR)-12-Hydroxy-4-methyl-4,5,6,7,8,8a,12,12a-octahydro-2H-3-benzoxecine-2,9(1H)-dione	Reference7607	POS	1.667	253.144	C14 H20 O4	(8aR,12S,12aR)-12-Hydroxy-4-methyl-4,5,6,7,8,8a,12,12a-octahydro-2H-3-benzoxecine-2,9(1H)-dione	0.00011119175039198	0.440998827113811	75.1937801934639	2	mzCloud	NA	NA	NA	NA	NA	NA	NA	NA	NA	6.97131e+06	6.95044e+06	6.43083e+06	8.9783e+06	1.04546e+07	3.13637e+06	9.64009e+06	1.54542e+07	3.05501e+06	8.04747e+06	159905	5.61017e+06	5.53036e+06	1.41295e+07	1.08215e+06	1.90477e+06	1.16369e+07	1.04677e+07	2.01851e+07	336892	7.50811e+06
C4931	C4931_(8aR,12S,12aR)-12-hydroxy-4-methyl-4,5,6,7,8,8a,12,12a-octahydro-1H-3-benzoxecine-2,9-dione	PB01746	POS	6.522	275.125	C14 H20 O4	(8aR,12S,12aR)-12-hydroxy-4-methyl-4,5,6,7,8,8a,12,12a-octahydro-1H-3-benzoxecine-2,9-dione	21.9817378678485	87182.0129053703	21.2283984096011	4	Public	NA	NA	NA	NA	NA	NA	NA	NA	NA	4.5734e+06	4.01551e+06	5.49702e+06	5.43563e+06	1.17638e+07	2.9081e+06	5.69831e+06	7.87417e+06	6.79358e+06	5.12298e+06	2.22931e+06	3.40695e+06	5.26783e+06	218785	3.61666e+06	3.6487e+06	2.25319e+06	4.97403e+06	1.54388e+06	1.54687e+06	4.41944e+06
C3688	C3688_(9E,12E)-N-(2-Hydroxyethyl)octadeca-9,12-dienamide	HMDB0247196	POS	8.737	324.29	C20 H37 N O2	(9E,12E)-N-(2-Hydroxyethyl)octadeca-9,12-dienamide	-9.41235937261808e-05	-0.291149735316807	NA	4	HMDB	NA	HMDB0247196	Organic acids and derivatives	Carboximidic acids	Carboximidic acids and derivatives	Organic acids	NA	NA	NA	174901	86016.9	211618	183409	48495.9	1.75847e+06	176531	129186	81742.5	167456	1.96464e+06	73077.8	56960.4	349021	58835.9	712838	61891.9	195956	145447	5.48885e+06	606267
A2437	A2437_(9R,10R)-Dihydroxyoctadecanoic acid; 9,10-Dihydroxystearic acid;	C08314	POS	0.847	317.269	C18 H36 O4	(9R,10R)-Dihydroxyoctadecanoic acid; 9,10-Dihydroxystearic acid;	-6.60587172092164e-05	-0.208873816636439	NA	4	KEGG	C08314	NA	FA Fatty acyls	FA0105 Hydroxy fatty acids	FA01 Fatty Acids and Conjugates	Fatty acyls[FA]	NA	NA	NA	6.79055e+06	2.87513e+06	3.15046e+06	3.62888e+06	2.51851e+06	5.21009e+06	3.74606e+06	4.45866e+06	6.40542e+06	2.67254e+06	3.21672e+06	1.28561e+06	1.11737e+07	1.21355e+07	1.41666e+07	1.4438e+07	5.09647e+06	5.00513e+06	1.66396e+06	2.29041e+07	6.6271e+06
A2273	A2273_(9R,12R,15R)-d10-13-PhytoF[13S,16R]	3.481_343.21300	NEG	3.481	343.213	C18 H32 O6	(9R,12R,15R)-d10-13-PhytoF[13S,16R]	0.00038368785823195	1.11465917857641	NA	4	NA	NA	NA	NA	NA	NA	NA	NA	NA	NA	6.86594e+06	6.92502e+06	3.62425e+06	1.07305e+07	1.26258e+07	2.47282e+06	5.24756e+06	3.35709e+06	4.19204e+06	7.34746e+06	581212	4.68883e+06	5.77264e+06	1.5101e+07	8.13191e+06	1.30355e+06	3.95824e+06	5.72385e+06	5.91608e+06	1.87687e+06	5.82213e+06
A1141	A1141_(9S)-5-hydroxy-4,15,16-trimethoxy-10-methyl-10-azatetracyclo[7.7.1.0	13.627_358.16102	POS	13.627	358.161	C20 H23 N O5	(9S)-5-hydroxy-4,15,16-trimethoxy-10-methyl-10-azatetracyclo[7.7.1.0	-0.00387482799686723	-10.8490698523616	44.389033266595	3	mzCloud	NA	NA	NA	NA	NA	NA	NA	NA	NA	607895	556878	2765.75	318573	584121	505646	958377	608744	77915	680262	14929.4	897727	338818	1.19615e+06	8278.48	11027.9	772296	713428	553461	13489.3	471039
C2525	C2525_(9S,10S)-10-hydroxy-9-(phosphonooxy)octadecanoic acid	9.859_395.22001	NEG	9.859	395.22	C18 H37 O7 P	(9S,10S)-10-hydroxy-9-(phosphonooxy)octadecanoic acid	-0.0003983566050465	-1.00537295926371	NA	4	NA	NA	NA	NA	NA	NA	NA	NA	NA	NA	1.08379e+06	625583	127487	215810	1.79648e+06	6.35917e+06	708740	776480	457036	682833	3.58045e+06	1.67367e+06	639671	743688	381339	4.77601e+06	1.31793e+06	968819	808962	6.2149e+06	1.69694e+06
C925	C925_(9aR,9bS)-9a-Hydroxy-6,9-dimethyl-3-methylene-3,3a,4,5,9a,9b-hexahydroazuleno[4,5-b]furan-2,7-dione	Reference7850	POS	5.792	261.112	C15 H16 O4	(9aR,9bS)-9a-Hydroxy-6,9-dimethyl-3-methylene-3,3a,4,5,9a,9b-hexahydroazuleno[4,5-b]furan-2,7-dione	-1.64467774652621e-05	-0.0632313349934377	68.2501881878018	2	mzCloud	NA	NA	NA	NA	NA	NA	NA	NA	NA	2.61509e+06	2.38248e+06	1.63271e+06	2.59889e+06	2.39488e+06	769221	1.68142e+06	1.88213e+06	2.09186e+06	1.82731e+06	187375	1.67729e+06	1.47265e+06	3.19628e+06	3.06331e+06	547123	3.07341e+06	1.533e+06	1.96614e+06	835164	1.87139e+06
C2589	C2589_(Ac)2-L-Lys-D-Ala; (Ac)2-L-lysyl-D-alanine;	C02487	POS	3.948	302.171	C13 H23 N3 O5	(Ac)2-L-Lys-D-Ala; (Ac)2-L-lysyl-D-alanine;	0.00027250047446614	0.904824885947645	NA	4	KEGG	C02487	NA	NA	NA	NA	NA	NA	NA	NA	706755	727065	945388	278931	821288	1.82494e+06	711366	1.03436e+06	843238	674609	2.01407e+06	2.3999e+06	1.11852e+06	1.97397e+06	323077	1.97034e+06	1.04252e+06	1.94183e+06	1.06687e+06	1.27234e+06	1.18457e+06
C2908	C2908_(E)-2-Methylgeranyl diphosphate;	C20235	POS	4.89	329.09	C11 H22 O7 P2	(E)-2-Methylgeranyl diphosphate;	-0.00093383706354188	-2.84633462045983	NA	4	KEGG	C20235	NA	NA	NA	NA	NA	NA	NA	NA	4.11353e+06	1.62569e+06	3.35643e+06	3.88342e+06	3.66676e+06	2.47167e+06	3.71717e+06	2.49849e+06	3.75419e+06	4.51631e+06	1.00902e+06	3.47886e+06	4.11263e+06	2.67094e+06	3.20602e+06	2.09836e+06	3.32714e+06	2.90269e+06	2.94452e+06	1.65845e+06	3.05061e+06
C4911	C4911_(E)-2-decylpent-2-enedioic acid	PB01567	POS	5.517	271.19	C15 H26 O4	(E)-2-decylpent-2-enedioic acid	5.58710069071822e-05	0.206789414322566	7.61333209957709	4	Public	NA	NA	NA	NA	NA	NA	NA	NA	NA	5.40568e+06	6.25269e+06	5.41001e+06	9.69392e+06	1.3631e+07	1.63428e+07	1.95758e+07	1.74049e+07	2.48575e+06	1.1007e+06	343073	4.31436e+06	1.76048e+06	5.86702e+06	5.95677e+06	667223	6.04817e+06	3.04847e+06	2.87859e+06	336536	6.42619e+06
C4917	C4917_(E)-3-(4-acetyloxy-2,3-dihydroxy-2,5,5,8a-tetramethyl-3,4,4a,6,7,8-hexahydro-1H-naphthalen-1-yl)prop-2-enoic acid	PB01638	POS	5.364	372.238	C19 H30 O6	(E)-3-(4-acetyloxy-2,3-dihydroxy-2,5,5,8a-tetramethyl-3,4,4a,6,7,8-hexahydro-1H-naphthalen-1-yl)prop-2-enoic acid	17.0260642157032	48068.493724993	19.0802303703251	4	Public	NA	NA	NA	NA	NA	NA	NA	NA	NA	2.21459e+06	2.67153e+06	2.50477e+06	2.52977e+06	1.60304e+06	946756	1.69883e+06	895703	1.92462e+06	2.46998e+06	183377	2.00863e+06	1.50238e+06	2.47351e+06	2.28373e+06	656361	1.79306e+06	1.37357e+06	1.57876e+06	668903	1.69909e+06
C3506	C3506_(E)-3-Hydroxy Tamoxifen O-|A-D-Glucuronide	HMDB0244742	POS	10.411	564.261	C32 H37 N O8	(E)-3-Hydroxy Tamoxifen O-|A-D-Glucuronide	0.00173175296879435	3.07456205083997	NA	4	HMDB	NA	HMDB0244742	Phenylpropanoids and polyketides	Stilbene glycosides	Stilbenes	Polyketides[PK]	NA	NA	NA	560370	625095	504060	498170	580134	1.79609e+06	486396	609051	578704	666492	6.28645e+06	670850	711680	580706	557657	3.96945e+06	549425	647326	528184	3.50112e+07	2.82087e+06
A3554	A3554_(E)-3-Tosylacrylonitrile	HMDB0248889	NEG	0.795	206.028	C10 H9 N O2 S	(E)-3-Tosylacrylonitrile	0.00018251371096766	0.881557992977829	NA	4	HMDB	NA	HMDB0248889	Benzenoids	Toluenes	Benzene and substituted derivatives	Benzene and derivatives	NA	NA	NA	302564	390307	54629.7	400527	107656	113881	48662.9	60450.7	341467	99806.6	423275	45405.7	57289.6	291864	5.44567e+06	631577	60118.9	82636.2	511398	1.04172e+06	525545
C4946	C4946_(E)-4-[(1R,2S,3S,4R,8aS)-2,3,4-trihydroxy-2,5,5,8a-tetramethyl-3,4,4a,6,7,8-hexahydro-1H-naphthalen-1-yl]but-3-en-2-one	PB01882	NEG	8.179	309.207	C18 H30 O4	(E)-4-[(1R,2S,3S,4R,8aS)-2,3,4-trihydroxy-2,5,5,8a-tetramethyl-3,4,4a,6,7,8-hexahydro-1H-naphthalen-1-yl]but-3-en-2-one	-0.00042168519422602	-1.359334645923	24.1982978299928	4	Public	NA	NA	NA	NA	NA	NA	NA	NA	NA	300556	223965	234083	660638	402989	3.50012e+06	430641	785530	482045	160941	2.02441e+06	608899	257751	1.72815e+06	620024	1.99227e+06	561625	397601	626480	5.79788e+06	1.08983e+06
C4093	C4093_(E)-5-(1-(2-Hydroxyethyl)-3-(pyridin-4-yl)-1H-pyrazol-4-yl)-2,3-dihydro-1H-inden-1-one oxime	HMDB0252658	NEG	6.149	333.137	C19 H18 N4 O2	(E)-5-(1-(2-Hydroxyethyl)-3-(pyridin-4-yl)-1H-pyrazol-4-yl)-2,3-dihydro-1H-inden-1-one oxime	0.00166050914066318	4.96945697267998	NA	4	HMDB	NA	HMDB0252658	Benzenoids	NA	Indanes	Benzene and derivatives	NA	NA	NA	520646	704431	855631	790974	452422	271448	662403	738403	1.04054e+06	378047	137938	486093	596139	1.02914e+06	1.58106e+06	165935	1.29475e+06	448868	538718	113451	640352
C4934	C4934_(E)-5-(4-methoxy-5-methyl-6-oxopyran-2-yl)-3-methylhex-4-enoic acid	PB01760	POS	5.189	266.139	C14 H18 O5	(E)-5-(4-methoxy-5-methyl-6-oxopyran-2-yl)-3-methylhex-4-enoic acid	17.0264885370845	63981.5923128005	13.471112107953	4	Public	NA	NA	NA	NA	NA	NA	NA	NA	NA	4.57039e+06	5.64473e+06	1.1373e+07	6.33689e+06	5.65254e+06	1.87892e+07	5.63989e+06	6.09001e+06	6.84034e+06	6.36239e+06	9.7603e+07	5.51889e+06	3.75237e+06	2.23329e+06	6.21705e+06	8.36625e+06	3.86753e+06	6.31081e+06	9.76502e+06	8.83927e+06	1.14886e+07
C4513	C4513_(E)-N-(2-Amino-4-fluorophenyl)-3-(1-cinnamyl-1H-pyrazol-4-yl)acrylamide	HMDB0257192	POS	9.713	363.163	C21 H19 F N4 O	(E)-N-(2-Amino-4-fluorophenyl)-3-(1-cinnamyl-1H-pyrazol-4-yl)acrylamide	0.00105142699374028	2.9032570498318	NA	4	HMDB	NA	HMDB0257192	Benzenoids	Anilides	Benzene and substituted derivatives	Benzene and derivatives	NA	NA	NA	3.39957e+06	2.72948e+06	869345	1.52393e+06	4.61419e+06	9.04221e+06	2.84263e+06	2.85903e+06	2.58552e+06	2.55723e+06	1.72819e+07	5.98222e+06	2.75231e+06	3.11081e+06	2.07547e+06	1.35007e+07	2.87764e+06	3.75614e+06	3.54558e+06	2.43962e+07	5.61511e+06
A3490	A3490_(E,E,E)-Geranylgeranyl alcohol	HMDB0247803	POS	0.749	291.268	C20 H34 O	(E,E,E)-Geranylgeranyl alcohol	-0.00041012826699216	-1.41296390341747	NA	4	HMDB	NA	HMDB0247803	Lipids and lipid-like molecules	Diterpenoids	Prenol lipids	Terpenoids	NA	NA	NA	1.96921e+06	887204	590524	1.14487e+06	211347	351968	834037	456084	527884	113941	357428	308630	676410	991853	5.54692e+06	345122	965543	571296	173648	744297	888411
A2647	A2647_(L-Cysteinylglycine-S-yl)(1H-indol-3-yl)acetonitrile;	C21665	NEG	2.405	331.086	C15 H16 N4 O3 S	(L-Cysteinylglycine-S-yl)(1H-indol-3-yl)acetonitrile;	-0.00068122450318242	-2.05129832297382	NA	4	KEGG	C21665	NA	NA	NA	NA	NA	NA	NA	NA	440404	770409	462938	557784	447770	256818	1.6314e+06	691137	1.2878e+06	2.80692e+06	192062	674199	862409	784433	160085	178477	1.04161e+06	765813	2.31488e+06	230072	827871
A2540	A2540_(R)-(Homo)2-citrate; (R)-2-Hydroxy-1,2,5-pentanetricarboxylate; (R)-2-Hydroxy-1,2,5-pentanetricarboxylic acid;	C16583	NEG	8.186	219.05	C8 H12 O7	(R)-(Homo)2-citrate; (R)-2-Hydroxy-1,2,5-pentanetricarboxylate; (R)-2-Hydroxy-1,2,5-pentanetricarboxylic acid;	-0.00073296124995181	-3.33075935524845	NA	4	KEGG	C16583	NA	NA	NA	NA	NA	Energy metabolism	Methane metabolism	map01100 Metabolic pathways; map01210 2-Oxocarboxylic acid metabolism; map01240 Biosynthesis of cofactors;	3.65217e+06	3.67181e+06	3.19269e+06	3.37895e+06	4.94439e+06	1.222e+07	3.03019e+06	3.48763e+06	3.99356e+06	5.54895e+06	4.12463e+06	3.49493e+06	3.97916e+06	2.44695e+06	2.53931e+06	4.06742e+06	2.81344e+06	4.05737e+06	4.04897e+06	4.27706e+06	4.14848e+06
A2606	A2606_(R)-2,3-Dihydroxypropane-1-sulfonate;	C19675	NEG	1.001	155.002	C3 H8 O5 S	(R)-2,3-Dihydroxypropane-1-sulfonate;	0.00020942763180187	1.34240527364146	NA	4	KEGG	C19675	NA	NA	NA	NA	NA	NA	NA	NA	1.4424e+07	3.22876e+07	4.50911e+07	5.45756e+07	5.43699e+07	7.10499e+07	5.71723e+07	1.64534e+08	3.25489e+07	3.43651e+07	1.43243e+07	4.92329e+07	4.5061e+07	3.75216e+08	2.69619e+07	2.34494e+07	2.19884e+07	2.82963e+08	1.47271e+08	4.23818e+07	7.94634e+07
C3708	C3708_(R)-2-(4-(Tert-butoxycarbonyl)morpholin-3-yl)acetic acid	HMDB0247375	POS	1.056	246.134	C11 H19 N O5	(R)-2-(4-(Tert-butoxycarbonyl)morpholin-3-yl)acetic acid	9.53294010628269e-05	0.388899078904935	NA	4	HMDB	NA	HMDB0247375	Organoheterocyclic compounds	Morpholines	Oxazinanes	Morpholines	NA	NA	NA	2.07167e+07	1.91805e+07	6.58707e+06	1.66265e+07	1.52432e+07	7.23129e+06	1.60711e+07	1.42473e+07	1.33241e+07	1.66935e+07	2.11134e+07	1.58806e+07	1.70681e+07	7.97349e+06	1.93607e+07	1.27816e+07	2.16073e+07	5.08871e+06	1.13766e+07	1.5875e+07	1.47023e+07
C672	C672_(R)-2-Hydroxycaprylic acid	HMDB0002264	POS	5.166	143.107	C8 H16 O3	(R)-2-Hydroxycaprylic acid	-18.0102422513438	-112486.718625344	83.5032899258987	2	Decode	NA	HMDB0002264	Lipids and lipid-like molecules	Fatty acids and conjugates	Fatty Acyls	Fatty acyls[FA]	NA	NA	NA	3.97517e+06	4.94762e+06	1.64834e+06	6.03724e+06	5.7546e+06	1.9157e+06	2.44605e+06	2.21821e+06	5.60781e+06	4.4877e+06	2.43323e+06	3.08943e+06	2.27147e+06	1.30073e+06	4.0395e+06	2.51816e+06	2.16312e+06	1.9174e+06	4.13752e+06	4.61868e+06	3.37638e+06
A2654	A2654_(R)-3-(Tetradecanoyloxy)tetradecanoic acid; (R)-3-(Myristoyloxy)myristic acid;	C22000	NEG	0.748	453.395	C28 H54 O4	(R)-3-(Tetradecanoyloxy)tetradecanoic acid; (R)-3-(Myristoyloxy)myristic acid;	0.00034554781205997	0.760444831561817	NA	4	KEGG	C22000	NA	NA	NA	NA	NA	NA	NA	NA	1.5118e+07	9.30104e+06	459250	4.66017e+06	1.70495e+06	916515	2.51311e+06	9.23996e+06	6.71974e+06	1.40718e+07	2.21679e+07	6.67758e+06	4.82964e+07	7.41633e+06	1.16195e+08	4.50791e+07	5.22543e+06	2.1066e+07	5.30691e+06	2.48372e+07	1.83486e+07
A588	A588_(R)-3-Hydroxy myristic acid	HMDB0010731	NEG	1.031	243.197	C14 H28 O3	(R)-3-Hydroxy myristic acid	3.83223237747643e-05	0.156927602148354	79.7614812495807	2	mzCloud	C22001	HMDB0010731	Lipids and lipid-like molecules	Fatty acids and conjugates	Fatty Acyls	Fatty acyls[FA]	NA	NA	NA	8.86938e+06	7.98281e+06	1.16403e+07	6.49719e+06	5.96062e+06	4.55531e+06	8.08188e+06	6.82034e+06	1.49914e+07	1.0727e+07	1.60173e+06	8.54687e+06	1.81255e+07	1.2302e+07	1.94094e+06	1.01066e+07	4.00131e+06	4.2407e+06	7.13628e+06	6.70812e+06	8.04181e+06
A3160	A3160_(R)-6-(3-Methylpiperazin-1-yl)nicotinonitrile	HMDB0243665	NEG	3.191	201.114	C11 H14 N4	(R)-6-(3-Methylpiperazin-1-yl)nicotinonitrile	-0.001003305870654	-4.96386654102288	NA	4	HMDB	NA	HMDB0243665	Organoheterocyclic compounds	Piperazines	Diazinanes	Piperazines	NA	NA	NA	4.20379e+06	4.11394e+06	1.62977e+07	5.59906e+06	1.01428e+07	1.02756e+07	4.89786e+06	3.60841e+06	2.798e+06	3.4891e+06	738628	4.44545e+06	2.72591e+06	6.18604e+06	3.45992e+06	1.5776e+06	3.6381e+06	2.86313e+06	4.29015e+06	1.19437e+06	4.82728e+06
C3296	C3296_(R)-MHD	HMDB0060701	POS	5.031	255.113	C15 H14 N2 O2	(R)-MHD	0.00018538513751309	0.729559641025704	NA	4	HMDB	NA	HMDB0060701	Organoheterocyclic compounds	Dibenzazepines	Benzazepines	Dibenzazepines	NA	NA	NA	117098	148001	134248	67123.9	77175.4	2.10086e+06	122758	53141.1	103417	83785.6	2.81585e+06	343358	69034.4	59506.4	71142.6	1.07197e+06	256411	260741	386285	2.09181e+06	521686
C4442	C4442_(R)-N-(Quinuclidin-3-yl)furo(2,3-C)pyridine-5-carboxamide	HMDB0256381	POS	4.792	272.14	C15 H17 N3 O2	(R)-N-(Quinuclidin-3-yl)furo(2,3-C)pyridine-5-carboxamide	0.00036725694246797	1.35453151439838	NA	4	HMDB	NA	HMDB0256381	Organoheterocyclic compounds	Pyridinecarboxylic acids and derivatives	Pyridines and derivatives	Pyridine and derivatives	NA	NA	NA	369761	1.50906e+06	1.60443e+06	868535	2.13223e+06	308182	1.15331e+06	1.11191e+06	1.46979e+06	1.26613e+06	873986	889480	604148	134820	763824	288376	440480	326693	3.32884e+06	103673	977383
C4522	C4522_(R)-N1-((S)-3,3-Dimethyl-1-(methylamino)-1-oxobutan-2-yl)-N4-hydroxy-2-isobutylsuccinamide	HMDB0257274	POS	4.867	316.223	C15 H29 N3 O4	(R)-N1-((S)-3,3-Dimethyl-1-(methylamino)-1-oxobutan-2-yl)-N4-hydroxy-2-isobutylsuccinamide	-0.00024912240456842	-0.790323326473792	NA	4	HMDB	NA	HMDB0257274	Organic acids and derivatives	Amino acids, peptides, and analogues	Carboxylic acids and derivatives	Amino acids, peptides, and analogues	NA	NA	NA	2.00932e+06	2.27418e+06	1.06391e+07	2.81749e+06	2.34706e+06	685162	7.2717e+06	8.45593e+06	2.5909e+06	3.1298e+06	703898	8.27104e+06	6.79703e+06	2.0415e+07	1.76797e+06	1.29648e+06	5.82598e+06	7.38456e+06	1.4454e+06	497219	4.83126e+06
C3471	C3471_(S)-(+)-1-Benzyl-3-aminopyrrolidine	HMDB0244407	POS	3.728	177.139	C11 H16 N2	(S)-(+)-1-Benzyl-3-aminopyrrolidine	0.00013831773438255	0.785310142551142	NA	4	HMDB	NA	HMDB0244407	Benzenoids	Phenylmethylamines	Benzene and substituted derivatives	Amines and derivatives	NA	NA	NA	152482	66227.1	424509	49606.1	44574.3	2.19625e+06	44743	79724.9	38868.3	40246.8	1.8405e+06	57378.3	42808.4	53426.9	65345.2	970450	141778	371756	114891	4.57541e+06	568549
C1928	C1928_(S)-(+)-N-Boc-3-pyrrolidinol	Reference2535	POS	1.224	188.128	C9 H17 N O3	(S)-(+)-N-Boc-3-pyrrolidinol	5.62854061172402e-05	0.300797095190476	9.19858731666751	3	mzCloud	NA	NA	NA	NA	NA	NA	NA	NA	NA	2.08147e+07	1.9197e+07	2.66079e+07	1.9879e+07	1.99605e+07	1.34594e+07	1.22902e+07	2.22417e+07	2.26635e+07	1.7172e+07	7.61903e+06	1.4792e+07	1.75929e+07	2.9084e+07	1.87084e+07	1.07725e+07	1.16305e+07	1.52289e+07	1.57424e+07	6.27002e+06	1.70863e+07
C2956	C2956_(S)-1-Hydroxy-N-methylcanadine;	C21586	POS	8.331	371.173	C21 H24 N O5	(S)-1-Hydroxy-N-methylcanadine;	3.56597657287239e-05	0.0963346685877002	NA	4	KEGG	C21586	NA	NA	NA	NA	NA	Biosynthesis of other secondary metabolites	Isoquinoline alkaloid biosynthesis	map01100 Metabolic pathways;	184522	86663.7	40472.6	170312	204353	3.33058e+06	130989	138021	131814	217921	1.13148e+06	243528	205428	185395	226190	1.1576e+06	45670	63802.6	138953	779136	440641
C3701	C3701_(S)-2-Amino-5-((4-nitrophenyl)amino)-5-oxopentanoic acid	HMDB0247328	POS	0.723	268.092	C11 H13 N3 O5	(S)-2-Amino-5-((4-nitrophenyl)amino)-5-oxopentanoic acid	-0.0003664154860985	-1.37190322247144	NA	4	HMDB	NA	HMDB0247328	Organic acids and derivatives	Amino acids, peptides, and analogues	Carboxylic acids and derivatives	Amino acids, peptides, and analogues	NA	NA	NA	1.75713e+06	1.55441e+06	1.43976e+06	1.43564e+06	1.58409e+06	813051	1.73449e+06	1.92093e+06	1.37888e+06	2.18599e+06	1.07727e+06	1.18077e+06	2.07939e+06	2.63712e+06	2.1277e+06	943170	2.34704e+06	1.70562e+06	1.92169e+06	1.22137e+06	1.65228e+06
C2721	C2721_(S)-2-Hydroxypropyl-CoM; (2S)-2-Hydroxypropyl-CoM;	C11498	POS	0.942	201.025	C5 H12 O4 S2	(S)-2-Hydroxypropyl-CoM; (2S)-2-Hydroxypropyl-CoM;	-0.00012022261719835	-0.601059891710491	NA	4	KEGG	C11498	NA	NA	NA	NA	NA	NA	NA	NA	1.59894e+06	2.2688e+06	314240	2.17197e+06	654637	632896	335134	337001	1.09868e+06	299877	848221	427389	572182	915552	4.12908e+06	545146	303775	322130	328831	1.25189e+06	967818
A1762	A1762_(S)-25-Hydroxy-14,16-hentriacontanedione	0.676_479.44723	NEG	0.676	479.447	C31 H60 O3	(S)-25-Hydroxy-14,16-hentriacontanedione	0.00026067612316182	0.542561805934907	NA	4	NA	NA	NA	NA	NA	NA	NA	NA	NA	NA	954290	1.01423e+06	54810.8	1.56579e+06	65740.5	130253	695405	176541	905366	196899	347256	151093	1.02623e+06	403007	3.37241e+06	171422	578289	452097	47584.3	966952	663784
C2986	C2986_(S)-3,4-Dihydroxybutyric acid	HMDB0000337	NEG	0.698	119.035	C4 H8 O4	(S)-3,4-Dihydroxybutyric acid	1.16342074250042e-05	0.0969175984924987	NA	4	HMDB	NA	HMDB0000337	Organic acids and derivatives	Beta hydroxy acids and derivatives	Hydroxy acids and derivatives	Organic acids	NA	NA	NA	8.89389e+06	8.09922e+06	5.19594e+06	7.61188e+06	5.74878e+06	4.2889e+07	5.85318e+06	1.00425e+07	5.0447e+06	4.93082e+06	4.35607e+07	1.66821e+07	3.11646e+06	2.57868e+07	1.35108e+07	6.74925e+07	1.14982e+07	1.25736e+07	8.22934e+06	1.09038e+08	2.07899e+07
C3751	C3751_(S)-3-(2-Methylphenoxy)propane-1,2-diol	HMDB0247880	POS	4.76	165.091	C10 H14 O3	(S)-3-(2-Methylphenoxy)propane-1,2-diol	0.00044099385536355	2.42178843248523	NA	4	HMDB	NA	HMDB0247880	Benzenoids	NA	Phenol ethers	Benzene and derivatives	NA	NA	NA	4.27162e+07	4.10872e+07	2.72669e+07	5.01363e+07	4.82563e+07	2.9859e+07	4.11595e+07	2.38311e+07	3.28698e+07	3.20068e+07	6.25909e+06	3.84092e+07	3.57131e+07	3.06845e+07	6.85485e+07	1.33759e+07	5.56768e+07	2.0456e+07	4.1373e+07	1.05712e+07	3.45128e+07
C4523	C4523_(S)-3-(8-(Dimethylaminomethyl)-6,7,8,9-tetrahydropyrido(1,2-a)indol-10-yl)-4-(1-methyl-3-indolyl)-1H-pyrrole-2,5-dione hydrochloride	HMDB0257275	NEG	7.343	451.215	C28 H28 N4 O2	(S)-3-(8-(Dimethylaminomethyl)-6,7,8,9-tetrahydropyrido(1,2-a)indol-10-yl)-4-(1-methyl-3-indolyl)-1H-pyrrole-2,5-dione hydrochloride	0.00143247188555051	3.16763522600287	NA	4	HMDB	NA	HMDB0257275	Organoheterocyclic compounds	N-alkylindoles	Indoles and derivatives	Indole and derivatives	NA	NA	NA	1.49904e+06	3.41619e+06	601102	1.5838e+06	589663	477583	1.04381e+06	1.70318e+06	1.32555e+06	1.65686e+06	151568	1.3213e+06	435786	1.19937e+06	2.75903e+06	274576	2.77653e+06	1.33017e+06	1.32933e+06	580986	1.30277e+06
C3472	C3472_(S)-4-(4-((2-(3,5-Dimethylphenyl)pyrrolidin-1-yl)Methyl)phenoxy)-3-fluorobenzaMide	HMDB0244422	POS	3.626	419.214	C26 H27 F N2 O2	(S)-4-(4-((2-(3,5-Dimethylphenyl)pyrrolidin-1-yl)Methyl)phenoxy)-3-fluorobenzaMide	0.00066140179643525	1.58152283837868	NA	4	HMDB	NA	HMDB0244422	Benzenoids	Diphenylethers	Benzene and substituted derivatives	Benzene and derivatives	NA	NA	NA	1.84317e+06	1.24136e+06	494436	359608	1.7106e+06	1.69169e+06	2.05772e+06	2.47172e+06	4.28052e+06	3.35396e+06	6.90278e+06	1.64582e+06	1.54123e+06	991115	1.13579e+06	3.18267e+06	1.61515e+06	1.55223e+06	6.70566e+06	427359	2.26023e+06
A3210	A3210_(S)-7-(3-Amino-1-pyrrolidinyl)-1-cyclopropyl-6-fluoro-1,4-dihydro-4-oxo-1,8-naphthyridine-3-carboxylic acid	HMDB0244252	NEG	0.715	331.122	C16 H17 F N4 O3	(S)-7-(3-Amino-1-pyrrolidinyl)-1-cyclopropyl-6-fluoro-1,4-dihydro-4-oxo-1,8-naphthyridine-3-carboxylic acid	0.00124331472568429	3.74347532225125	NA	4	HMDB	NA	HMDB0244252	Organoheterocyclic compounds	Naphthyridines	Diazanaphthalenes	Naphthyridines	NA	NA	NA	2.92685e+07	2.24055e+07	3.14194e+07	2.2077e+07	3.80886e+07	4.54002e+06	2.32759e+07	2.83948e+07	2.26946e+07	1.05971e+07	4.58644e+06	1.2923e+07	3.20251e+06	3.14352e+07	9.28441e+07	1.18447e+07	3.8254e+07	1.27137e+07	1.31346e+07	7.66321e+06	2.30682e+07
A2511	A2511_(S)-ACPA; (S)-2-Amino-3-(3-carboxy-5-methyl-4-isoxazolyl)porionic acid;	C13673	NEG	3.108	213.052	C8 H10 N2 O5	(S)-ACPA; (S)-2-Amino-3-(3-carboxy-5-methyl-4-isoxazolyl)porionic acid;	0.00024624796876082	1.15037443777918	NA	4	KEGG	C13673	NA	NA	NA	NA	NA	NA	NA	NA	2.25638e+06	1.84033e+06	2.94689e+06	2.58813e+06	3.69995e+06	722453	2.14624e+06	2.12508e+06	1.2008e+06	1.50004e+06	309852	1.57104e+06	1.42603e+06	3.10753e+06	1.44215e+06	266674	2.34648e+06	1.13663e+06	1.51558e+06	291292	1.72198e+06
A3162	A3162_(S)-Dimethyl 2-aminopentanedioate	HMDB0243725	NEG	8.495	174.077	C7 H13 N O4	(S)-Dimethyl 2-aminopentanedioate	0.00024798354044719	1.41636524210865	NA	4	HMDB	NA	HMDB0243725	Organic acids and derivatives	Amino acids, peptides, and analogues	Carboxylic acids and derivatives	Amino acids, peptides, and analogues	NA	NA	NA	7.92435e+06	7.76172e+06	8.8587e+06	8.29152e+06	7.89577e+06	8.59632e+06	7.53229e+06	7.51008e+06	5.7449e+06	5.81123e+06	1.60237e+06	6.06614e+06	6.17388e+06	1.649e+07	4.89684e+06	3.15184e+06	5.52431e+06	1.28638e+07	8.27792e+06	2.31512e+06	7.16446e+06
C668	C668_(S)-Equol	HMDB0002209	POS	6.116	243.102	C15 H14 O3	(S)-Equol	0.00012180484077362	0.503129746060566	96.9677693600121	2	mzCloud	C14131	HMDB0002209	Phenylpropanoids and polyketides	Isoflavans	Isoflavonoids	Flavonoids	Global and overview maps	Metabolic pathways	map01100 Metabolic pathways;	6.44978e+07	3.14236e+07	5.73549e+07	4.53992e+07	2.86333e+07	1.19415e+07	4.56421e+07	4.54834e+07	3.38791e+07	1.16656e+07	1.03708e+07	1.51408e+07	3.77725e+07	3.92244e+07	7.66555e+07	2.82082e+07	4.62912e+07	3.62742e+07	3.25017e+07	3.53882e+07	3.66874e+07
C127	C127_(S)-Homostachydrine	HMDB0033433	POS	3.671	158.118	C8 H15 N O2	(S)-Homostachydrine	0.00030736287459376	1.95635115178229	70.6178199531362	1	Decode	C08283	HMDB0033433	Organic acids and derivatives	Amino acids, peptides, and analogues	Carboxylic acids and derivatives	Amino acids, peptides, and analogues	NA	NA	NA	6.65598e+06	3.60382e+06	4.89986e+06	6.71594e+06	6.47907e+06	6.27417e+06	3.30665e+06	1.57546e+06	2.91572e+06	1.0089e+07	9.23844e+06	2.79884e+06	7.10738e+06	3.26149e+06	5.33953e+06	2.65222e+06	4.7757e+06	1.92322e+06	3.51108e+06	4.45852e+06	4.8791e+06
A3163	A3163_(S)-Methyl 2,5-diamino-5-oxopentanoate	HMDB0243735	POS	2.038	161.092	C6 H12 N2 O3	(S)-Methyl 2,5-diamino-5-oxopentanoate	0.00031582015097342	1.97283044011932	NA	4	HMDB	NA	HMDB0243735	Organic acids and derivatives	Amino acids, peptides, and analogues	Carboxylic acids and derivatives	Amino acids, peptides, and analogues	NA	NA	NA	1.14178e+06	1.33412e+06	415685	2.31167e+06	2.24018e+06	118069	1.5806e+06	703462	672813	1.3011e+06	91565.2	2.11024e+06	556778	315391	661476	94395.3	780098	420050	745306	132070	886342
C258	C258_(S)-N-a-benzoylarginine ethyl ester	3.887_307.17669	POS	3.887	307.177	C15 H22 N4 O3	(S)-N-a-benzoylarginine ethyl ester	0.00022293164818165	0.728132206401029	74.1112066791113	2	mzCloud	NA	NA	NA	NA	NA	NA	NA	NA	NA	940646	8.57413e+06	1.77801e+06	846581	843181	1.57018e+06	1.39949e+06	1.60486e+06	1.34114e+06	255981	4.58038e+06	520807	577082	1.49696e+08	996730	1.23767e+06	1.7999e+06	966648	7.12037e+06	2.17208e+06	9.44109e+06
C3672	C3672_(S)-N1-((1H-Benzo[d]imidazol-2-yl)methyl)-N1-(5,6,7,8-tetrahydroquinolin-8-yl)butane-1,4-diamine	HMDB0246964	NEG	9.345	348.221	C21 H27 N5	(S)-N1-((1H-Benzo[d]imidazol-2-yl)methyl)-N1-(5,6,7,8-tetrahydroquinolin-8-yl)butane-1,4-diamine	0.00170667926744272	4.88702476720879	NA	4	HMDB	NA	HMDB0246964	Organoheterocyclic compounds	Aminoquinolines and derivatives	Quinolines and derivatives	Aminoquinolines and derivatives	NA	NA	NA	806678	1.19286e+06	1.20111e+06	576001	315456	773130	971952	774025	1.11358e+06	1.11874e+06	1.11721e+06	909163	1.10458e+06	443174	702848	514601	993645	715442	856874	1.64987e+06	892546
A2023	A2023_(S)-malyl alpha-D-glucosaminide	0.937_296.09833	POS	0.937	296.098	C10 H17 N O9	(S)-malyl alpha-D-glucosaminide	0.00072009671873729	2.44025860324417	NA	4	NA	NA	NA	NA	NA	NA	NA	NA	NA	NA	420437	250192	183409	336587	377804	153636	301806	137097	200230	171943	111085	172978	156325	1.54431e+06	996464	82249.9	304024	97404.6	240139	88594.2	316336
C4869	C4869_(Z)-2-methyl-4-[(2R,3R,4S,5S,6R)-3,4,5-trihydroxy-6-(hydroxymethyl)oxan-2-yl]oxybut-2-enenitrile	PB00666	POS	2.641	260.113	C11 H17 N O6	(Z)-2-methyl-4-[(2R,3R,4S,5S,6R)-3,4,5-trihydroxy-6-(hydroxymethyl)oxan-2-yl]oxybut-2-enenitrile	-8.06853223025428e-05	-0.31139939204896	21.531788434056	4	Public	NA	NA	NA	NA	NA	NA	NA	NA	NA	1.36356e+07	1.59652e+06	5.39899e+06	8.90811e+06	1.30825e+07	4.68804e+07	5.08905e+06	7.21409e+06	9.19629e+06	1.20095e+07	4.60247e+07	3.22107e+06	1.3e+07	7.60985e+06	1.28025e+07	5.67246e+06	1.15576e+07	1.51201e+07	7.83742e+06	9.97468e+06	1.27916e+07
A4030	A4030_(Z)-3-(1,2-Dihydroxyethyl)-3-hydroxyhenicos-12-en-2-one	HMDB0255948	NEG	0.83	383.317	C23 H44 O4	(Z)-3-(1,2-Dihydroxyethyl)-3-hydroxyhenicos-12-en-2-one	0.00012194782829055	0.317304776885115	NA	4	HMDB	NA	HMDB0255948	Lipids and lipid-like molecules	Fatty alcohols	Fatty Acyls	Fatty acyls[FA]	NA	NA	NA	1.0761e+07	1.18017e+06	236284	1.96817e+06	2.48615e+06	2.28913e+06	3.34795e+06	2.0151e+07	5.82031e+06	1.37383e+07	2.6725e+07	2.1677e+06	2.52344e+07	1.27477e+07	3.07586e+07	5.64978e+07	3.16801e+06	1.72874e+07	3.14602e+06	2.44362e+07	1.32074e+07
A3238	A3238_(Z)-7-[(1R,2R,3R,5S)-2-(1,2-Dihydroxy-3-oxooctyl)-3,5-dihydroxycyclopentyl]hept-5-enoic acid	HMDB0244520	POS	1.081	387.238	C20 H34 O7	(Z)-7-[(1R,2R,3R,5S)-2-(1,2-Dihydroxy-3-oxooctyl)-3,5-dihydroxycyclopentyl]hept-5-enoic acid	8.70151056915347e-05	0.225293228346161	NA	4	HMDB	NA	HMDB0244520	Lipids and lipid-like molecules	Eicosanoids	Fatty Acyls	Fatty acyls[FA]	NA	NA	NA	1.62442e+06	916190	956056	1.67362e+06	2.06836e+06	370200	1.32254e+06	2.38103e+06	517518	1.01899e+06	62337.4	653507	669155	2.11175e+06	1.11149e+06	315916	1.26277e+06	665199	875714	659837	1.06183e+06
C3674	C3674_(Z)-p-Methoxycinnamic acid	HMDB0246971	POS	4.276	179.071	C10 H10 O3	(Z)-p-Methoxycinnamic acid	0.00040868923585435	2.29519467489598	NA	4	HMDB	NA	HMDB0246971	Phenylpropanoids and polyketides	Cinnamic acids	Cinnamic acids and derivatives	Polyketides[PK]	NA	NA	NA	2.66723e+06	3.78384e+06	3.61605e+06	4.53803e+06	4.53628e+06	3.67634e+06	2.87648e+06	2.91048e+06	3.69408e+06	3.78763e+06	2.24687e+06	2.38589e+06	3.06986e+06	3.74999e+06	3.3434e+06	2.78702e+06	1.22932e+06	3.13086e+06	4.13332e+06	2.1784e+06	3.21707e+06
A564	A564_(s)-dihydroorotate	HMDB0003349	NEG	8.477	157.026	C5 H6 N2 O4	(s)-dihydroorotate	0.00023015492780587	1.45637482245246	92.4247734219767	2	BMDB	C00337	HMDB0003349	Organic acids and derivatives	Amino acids, peptides, and analogues	Carboxylic acids and derivatives	Amino acids, peptides, and analogues	Nucleotide metabolism	Pyrimidine metabolism	map00240 Pyrimidine metabolism; map01100 Metabolic pathways; map01240 Biosynthesis of cofactors;	2.12144e+07	2.21705e+07	3.16477e+07	1.6207e+07	1.8397e+07	5.67066e+07	3.53871e+07	3.6719e+07	2.2327e+07	3.60863e+07	5.78364e+07	6.29797e+07	6.0045e+07	3.48257e+07	4.87791e+06	3.49337e+07	1.63107e+07	7.05366e+07	1.43587e+07	2.10721e+07	3.3732e+07
A417	A417_(s)-malate	HMDB0000156	NEG	13.067	133.015	C4 H6 O5	(s)-malate	0.00027733031856769	2.0692968710348	95.8985666685223	2	BMDB	C00149	HMDB0000156	Organic acids and derivatives	Beta hydroxy acids and derivatives	Hydroxy acids and derivatives	Organic acids	Carbohydrate metabolism	Citrate cycle (TCA cycle)	map00020 Citrate cycle (TCA cycle); map00620 Pyruvate metabolism; map00630 Glyoxylate and dicarboxylate metabolism; map01100 Metabolic pathways; map01200 Carbon metabolism;	2.78836e+07	2.06463e+07	7.25288e+07	1.11162e+07	4.38786e+07	7.21936e+08	3.09017e+07	3.34602e+07	4.02954e+07	2.25638e+07	1.00156e+08	6.88203e+07	6.87874e+07	1.14615e+08	2.37533e+07	4.59812e+07	3.20272e+07	1.31152e+08	6.01627e+07	3.07701e+07	8.50718e+07
A2136	A2136_1(3)-glyceryl-PGF2alpha	1.599_427.27042	NEG	1.599	427.27	C23 H40 O7	1(3)-glyceryl-PGF2alpha	0.00028948976557785	0.67593985412179	NA	4	NA	NA	NA	NA	NA	NA	NA	NA	NA	NA	152873	151836	132383	186476	97629.8	2.1678e+06	95587.9	81085	131204	139466	3.41427e+06	80184.7	95632.1	48433.8	221875	3.48714e+06	71275.1	116612	170131	1.32588e+07	1.21503e+06
C4746	C4746_1,1'-(1,8-Dioxo-1,8-octanediyl)bis-2,5-pyrrolidinedione	HMDB0259675	POS	4.618	337.14	C16 H20 N2 O6	1,1'-(1,8-Dioxo-1,8-octanediyl)bis-2,5-pyrrolidinedione	0.00023560750003071	0.700937145416297	NA	4	HMDB	NA	HMDB0259675	Organoheterocyclic compounds	N-acylpyrrolidines	Pyrrolidines	N-acylpyrrolidines	NA	NA	NA	3.23069e+06	3.16233e+06	1.89491e+06	6.93614e+06	1.91732e+06	2.2202e+06	2.03299e+06	1.34996e+06	1.92615e+06	2.36937e+06	3.77579e+06	1.61803e+06	1.93738e+06	2.1583e+06	7.2047e+06	1.9188e+06	2.66891e+06	1.47579e+06	2.65434e+06	736711	2.65944e+06
C3408	C3408_1,1'-Spirobi[1H-indene]-5,5',6,6'-tetrol, 2,2',3,3'-tetrahydro-3,3,3',3'-tetramethyl-	HMDB0243484	POS	7.086	341.175	C21 H24 O4	1,1'-Spirobi[1H-indene]-5,5',6,6'-tetrol, 2,2',3,3'-tetrahydro-3,3,3',3'-tetramethyl-	-0.00011416796871799	-0.335622840036908	NA	4	HMDB	NA	HMDB0243484	Benzenoids	NA	Indanes	Benzene and derivatives	NA	NA	NA	105245	110073	93637.1	92659.6	92170.2	149104	101721	90246.1	97462.8	116467	157619	111551	113936	2.48306e+06	102601	123627	102170	98841.6	91539.5	191675	231270
A3197	A3197_1,1,1,2,3,3,3-Heptafluoropropane	HMDB0244037	NEG	0.553	168.99	C3 H F7	1,1,1,2,3,3,3-Heptafluoropropane	0.00026360631213151	1.55065594596541	NA	4	HMDB	NA	HMDB0244037	Organohalogen compounds	NA	Organofluorides	Organofluorides	NA	NA	NA	7.53823e+06	5.65369e+06	4.58955e+06	5.78452e+06	8.93566e+06	2.80038e+07	2.75517e+06	5.81541e+06	9.9261e+06	5.60174e+06	2.22186e+07	7.54938e+06	8.52884e+06	2.45896e+06	1.2024e+07	2.08483e+07	3.17711e+06	5.17146e+06	7.94925e+06	3.05329e+07	1.02531e+07
C4403	C4403_1,1,1-Trifluoroheptadecan-2-one	HMDB0256073	POS	9	309.24	C17 H31 F3 O	1,1,1-Trifluoroheptadecan-2-one	5.33731460450326e-05	0.173158610434655	NA	4	HMDB	NA	HMDB0256073	Organic oxygen compounds	Carbonyl compounds	Organooxygen compounds	Carbonyl compounds	NA	NA	NA	339072	432193	288657	180019	557796	5.39578e+06	648961	768650	1.63359e+06	878625	1.31195e+06	824749	2.593e+06	1.60097e+06	163507	4.51566e+06	779864	1.79951e+06	387009	2.19058e+06	1.36451e+06
C3717	C3717_1,1-Bis(4-hydroxyphenyl)cyclohexane	HMDB0247513	POS	7.88	269.153	C18 H20 O2	1,1-Bis(4-hydroxyphenyl)cyclohexane	-0.00019456476559298	-0.725591753346408	NA	4	HMDB	NA	HMDB0247513	Benzenoids	Diphenylmethanes	Benzene and substituted derivatives	Benzene and derivatives	NA	NA	NA	9.61981e+06	6.73743e+06	2.7011e+06	8.04538e+06	4.08719e+06	103865	6.32255e+06	2.02843e+06	4.40201e+06	4.4136e+06	135088	2.96117e+06	5.14719e+06	7.90965e+06	6.232e+06	381736	2.77742e+06	1.32433e+06	881954	164660	3.81883e+06
C1131	C1131_1,1-Dimethyl-2-oxopropyl N-[2-(2-pyridyl)ethyl]carbamate	3.273_251.13947	POS	3.273	251.139	C13 H18 N2 O3	1,1-Dimethyl-2-oxopropyl N-[2-(2-pyridyl)ethyl]carbamate	0.00065668182801914	2.62534383631538	25.2745532124793	3	mzCloud	NA	NA	NA	NA	NA	NA	NA	NA	NA	2.92172e+06	1.95314e+06	3.08089e+06	1.39507e+06	2.54018e+06	5.51149e+06	1.55797e+06	4.01635e+06	1.99299e+06	1.78199e+06	1.67878e+07	1.26705e+06	1.79008e+06	9.69526e+06	3.36304e+06	2.09181e+06	2.64631e+06	2.62383e+06	3.57524e+06	5.64657e+06	3.81194e+06
C1443	C1443_1,1-dimethyl-3-(5-pyrimidinyl)-2-propynyl N-methylcarbamate	5.23_220.10832	POS	5.23	220.108	C11 H13 N3 O2	1,1-dimethyl-3-(5-pyrimidinyl)-2-propynyl N-methylcarbamate	0.00026892355467111	1.22739662933442	37.8910963029341	3	mzCloud	NA	NA	NA	NA	NA	NA	NA	NA	NA	31056.8	31051.6	34040.1	35054.7	46005.3	1.74634e+06	34921.6	30449.1	29506.5	31875.8	2.62866e+06	90095.8	30505.4	51597.1	33607.6	207109	30809.7	104935	136490	170830	276747
A3198	A3198_1,10-Bis(carboxymethylthio)decane	HMDB0244052	NEG	0.554	321.12	C14 H26 O4 S2	1,10-Bis(carboxymethylthio)decane	0.00029582539070816	0.918349472686701	NA	4	HMDB	NA	HMDB0244052	Organic acids and derivatives	Dicarboxylic acids and derivatives	Carboxylic acids and derivatives	Organic acids	NA	NA	NA	725621	1.16887e+06	1.37874e+06	1.28636e+06	703061	142814	486861	1.30945e+06	1.76547e+06	302176	239530	295552	596360	605128	8.88041e+06	371909	1.95304e+06	108428	545103	117902	1.14914e+06
C2277	C2277_1,17,19-trihydroxy-7-methyl-3-oxapentacyclo[9.8.0.0	5.498_360.14416	POS	5.498	360.144	C19 H18 O6	1,17,19-trihydroxy-7-methyl-3-oxapentacyclo[9.8.0.0	17.0265442902518	49769.160390833	28.1327201020012	4	Public	NA	NA	NA	NA	NA	NA	NA	NA	NA	2.39285e+06	2.58856e+06	1.63605e+06	919713	719767	2.98219e+06	1.81358e+06	2.99982e+06	2.54564e+06	2.06933e+06	2.33057e+06	3.2622e+06	2.07183e+06	855184	753778	2.60711e+06	3.00296e+06	3.44087e+06	2.1122e+06	1.69804e+06	2.14011e+06
A1576	A1576_1,2,2,6,6-Pentamethyl-4-piperidyl methacrylate	Reference2637	POS	1.031	240.196	C14 H25 N O2	1,2,2,6,6-Pentamethyl-4-piperidyl methacrylate	3.02150893674025e-05	0.126323321189532	54.4397646498134	3	mzCloud	NA	NA	NA	NA	NA	NA	NA	NA	NA	1.45574e+06	896576	1.09119e+06	1.48268e+06	912565	3.85867e+06	639743	832811	3.38976e+06	1.32875e+06	8.55014e+06	1.0515e+06	2.05788e+06	566880	3.42184e+06	7.32444e+06	649366	1.16065e+06	991812	6.14894e+06	2.3906e+06
C3448	C3448_1,2,3,4-Tetrahydro-2-naphthylamine	HMDB0244119	POS	5.93	148.112	C10 H13 N	1,2,3,4-Tetrahydro-2-naphthylamine	-0.0001222846484552	-0.831275722901528	NA	4	HMDB	NA	HMDB0244119	Benzenoids	NA	Tetralins	Benzene and derivatives	NA	NA	NA	67086.4	48474.4	186897	105843	213169	58160.8	48607.3	700517	196300	413700	68106.1	49380.4	289803	6.04234e+06	55863	71681.8	47260.4	138196	43815.2	918463	488183
A3205	A3205_1,2,3,4-Tetrahydroquinoxaline	HMDB0244123	POS	3.513	135.092	C8 H10 N2	1,2,3,4-Tetrahydroquinoxaline	0.00021138307957357	1.57649273333525	NA	4	HMDB	NA	HMDB0244123	Organic nitrogen compounds	Amines	Organonitrogen compounds	Amines	NA	NA	NA	1.2312e+07	1.05913e+07	8.21453e+06	1.39525e+07	9.11219e+06	3.33704e+06	1.10555e+07	8.90418e+06	9.72923e+06	5.44123e+06	4.08681e+06	6.8928e+06	6.30958e+06	9.35066e+06	1.99534e+07	2.89681e+06	1.3748e+07	7.40793e+06	6.99793e+06	4.90884e+06	8.76012e+06
A1590	A1590_1,2,3,4-Tetramethyl-1,3-cyclopentadiene	Reference3247	POS	1.079	123.117	C9 H14	1,2,3,4-Tetramethyl-1,3-cyclopentadiene	0.00014682695312728	1.20241989772521	47.8267109521489	3	mzCloud	NA	NA	NA	NA	NA	NA	NA	NA	NA	6.0661e+06	5.71854e+06	1.35222e+06	6.8401e+06	2.53613e+06	1.19309e+07	3.09804e+06	1.79541e+06	2.63409e+06	3.97719e+06	2.60366e+06	2.09572e+06	7.00718e+06	2.89994e+06	5.1941e+06	3.23639e+06	1.81842e+06	1.80997e+06	2.29621e+06	3.63596e+06	3.92731e+06
A111	A111_1,2,3,9-tetrahydro-4H-carbazol-4-one oxime	0.954_201.10260	POS	0.954	201.103	C12 H12 N2 O	1,2,3,9-tetrahydro-4H-carbazol-4-one oxime	0.00036405053779731	1.81938881624965	74.3066758049451	2	mzCloud	NA	NA	NA	NA	NA	NA	NA	NA	NA	154997	295411	542543	214083	285511	586932	388101	1.20698e+06	568446	393459	1.58863e+07	661691	548028	147584	1.10703e+06	6.47505e+06	592226	1.35715e+06	308950	1.05194e+07	2.11199e+06
C3447	C3447_1,2,3-Trioxolane	HMDB0244110	NEG	0.633	110.985	C2 H4 O3	1,2,3-Trioxolane	-7.65574901748778e-05	-1.00712278917655	NA	4	HMDB	NA	HMDB0244110	Organoheterocyclic compounds	NA	Trioxolanes	Trioxolanes	NA	NA	NA	62253.7	63351.5	1.33899e+06	56399.4	146666	3.00637e+06	228887	1.56956e+06	65043.7	277707	2.30238e+06	897923	1.11233e+06	58739.8	51604.9	3.32782e+06	233906	3.54554e+06	122210	5.19324e+06	1.18305e+06
C2892	C2892_1,2,3-Tris(chloromethoxy)propane;	C19544	POS	5.236	236.985	C6 H11 Cl3 O3	1,2,3-Tris(chloromethoxy)propane;	4.02077424155323e-05	0.170388123164633	NA	4	KEGG	C19544	NA	NA	NA	NA	NA	NA	NA	NA	3.74669e+06	4.14085e+06	3.23207e+06	4.84158e+06	5.28873e+06	4.60903e+06	4.27214e+06	3.09346e+06	5.96942e+06	5.91029e+06	6.05783e+06	4.21045e+06	5.62106e+06	2.97032e+06	4.10543e+06	3.47848e+06	2.8817e+06	2.69216e+06	3.21889e+06	4.29559e+06	4.23181e+06
A749	A749_1,2,4-Benzenetricarboxylic acid	Reference7298	NEG	13.063	209.01	C9 H6 O6	1,2,4-Benzenetricarboxylic acid	0.00035694100981231	1.6995860590028	97.1657294255654	2	mzCloud	NA	NA	NA	NA	NA	NA	NA	NA	NA	313657	321849	3.70141e+06	473195	1.31301e+06	1.44944e+06	931271	1.3601e+06	213930	851356	109706	1.76649e+06	668613	445288	58959.3	398536	1.62345e+06	2.37056e+06	612422	119516	955138
C957	C957_1,2,4-Oxadiazol-3-ylmethyl morpholine-4-carbodithioate	0.625_244.02237	NEG	0.625	244.022	C8 H11 N3 O2 S2	1,2,4-Oxadiazol-3-ylmethyl morpholine-4-carbodithioate	0.00038265348845811	1.56166441540132	9.91040894598079	3	mzCloud	NA	NA	NA	NA	NA	NA	NA	NA	NA	170244	676650	679040	206132	467036	3.16605e+07	791064	1.29033e+06	200036	613215	4.55663e+07	2.95802e+06	336218	484266	818941	2.24794e+07	629132	8.79614e+06	257140	6.37707e+07	9.14252e+06
C3449	C3449_1,2,4-Trimethylcyclohexane	HMDB0244143	POS	10.249	127.148	C9 H18	1,2,4-Trimethylcyclohexane	0.00024535226148714	1.94506585643593	NA	4	HMDB	NA	HMDB0244143	Hydrocarbons	Cycloalkanes	Saturated hydrocarbons	Cycloalkanes	NA	NA	NA	125215	144602	111661	107041	123329	3.70566e+06	121132	123445	142692	150750	2.94281e+06	161857	153374	119191	123669	2.04174e+07	118276	131264	133509	2.03145e+06	1.55941e+06
C4133	C4133_1,2-Cyclohexanedicarboxylic acid, 4-methyl-	HMDB0253138	POS	4.931	187.097	C9 H14 O4	1,2-Cyclohexanedicarboxylic acid, 4-methyl-	0.00040892400406278	2.19746220995719	NA	4	HMDB	NA	HMDB0253138	Organic acids and derivatives	Dicarboxylic acids and derivatives	Carboxylic acids and derivatives	Organic acids	NA	NA	NA	2.20762e+06	1.30735e+06	741985	91093.1	8.19585e+06	3.30913e+06	4.00157e+06	5.27187e+06	1.12503e+07	5.41341e+06	9.30282e+06	5.64745e+06	1.55459e+06	171870	590448	2.67854e+06	1.45735e+06	1.09529e+06	2.96182e+06	3.77602e+06	3.55132e+06
A2381	A2381_1,2-Didecanoylglycerol; 1,2-Didecanoyl-sn-glycerol;	C03199	NEG	0.724	399.312	C23 H44 O5	1,2-Didecanoylglycerol; 1,2-Didecanoyl-sn-glycerol;	0.00056476554863138	1.4107892104531	NA	4	KEGG	C03199	NA	GL Glycerolipids	GL0201 Diacylglycerols	GL02 Diradylglycerols	Glycerolipids[GL]	NA	NA	NA	1.18981e+06	1.95603e+06	66065.6	1.02602e+06	519062	731720	876938	334885	2.57134e+06	605835	1.23454e+07	877116	1.46592e+06	326283	3.93827e+06	5.38484e+06	858690	426128	1.05924e+06	2.26388e+07	2.95992e+06
A3200	A3200_1,2-Dihydrotanshinquinone	HMDB0244078	NEG	0.886	259.076	C18 H14 O3	1,2-Dihydrotanshinquinone	-0.00060361513641282	-2.17054124790963	NA	4	HMDB	NA	HMDB0244078	Lipids and lipid-like molecules	Diterpenoids	Prenol lipids	Terpenoids	NA	NA	NA	101288	100819	679902	98061.7	94417.6	2.11379e+07	85928.3	189127	148977	119564	1.85194e+06	128975	210858	250755	174120	391044	86667.3	211458	211210	735314	1.35042e+06
C1418	C1418_1,2-Dimethyl-5,6-dinitro-1H-benzo[d]imidazole	5.09_237.06182	POS	5.09	237.062	C9 H8 N4 O4	1,2-Dimethyl-5,6-dinitro-1H-benzo[d]imidazole	-1.60653349041695e-05	-0.0680577205073221	49.5386132448695	3	mzCloud	NA	NA	NA	NA	NA	NA	NA	NA	NA	2.67595e+07	2.35791e+07	2.53706e+07	4.04869e+07	2.74166e+07	6.09445e+06	3.0579e+07	2.03328e+07	2.57048e+07	2.04845e+07	7.9488e+06	1.72087e+07	2.12579e+07	3.98623e+07	3.14121e+07	8.61707e+06	2.97336e+07	1.46772e+07	3.20461e+07	1.15521e+07	2.30562e+07
A3201	A3201_1,2-Dimethylimidazole	HMDB0244082	POS	3.78	97.0762	C5 H8 N2	1,2-Dimethylimidazole	0.00017801758883706	1.85302288307473	NA	4	HMDB	NA	HMDB0244082	Organoheterocyclic compounds	Imidazoles	Azoles	Imidazoles	NA	NA	NA	2.51353e+07	3.01272e+07	2.0247e+07	2.08632e+07	2.25697e+07	2.13951e+07	1.05764e+07	1.25813e+07	1.03001e+07	9.79993e+06	4.27086e+07	2.97516e+07	1.11356e+07	2.12421e+07	2.97496e+07	4.69013e+07	4.02566e+07	2.16799e+07	4.42085e+07	2.16763e+07	2.46453e+07
A3202	A3202_1,2-Dioleoyl-sn-glycero-3-phosphoethanolamine	HMDB0244088	POS	2.855	744.554	C41 H78 N O8 P	1,2-Dioleoyl-sn-glycero-3-phosphoethanolamine	-0.00015144432097713	-0.203678344302699	NA	4	HMDB	NA	HMDB0244088	Lipids and lipid-like molecules	Glycerophosphoethanolamines	Glycerophospholipids	Amines and derivatives	NA	NA	NA	70940.2	541793	82326.2	131976	119843	9.64389e+06	106967	168980	556182	498535	2.24312e+08	115695	1.52268e+06	328658	3.05146e+06	9.45453e+07	130377	511655	220527	2.71647e+08	3.04153e+07
C3446	C3446_1,2-Dioleoyl-sn-glycero-3-phosphoglycerol	HMDB0244089	NEG	11.395	773.537	C42 H79 O10 P	1,2-Dioleoyl-sn-glycero-3-phosphoglycerol	0.00303429477412465	3.91753882834237	NA	4	HMDB	NA	HMDB0244089	Lipids and lipid-like molecules	Glycerophosphoglycerols	Glycerophospholipids	Glycerophospholipids[GP]	NA	NA	NA	13370.1	13687.5	5.33901e+06	3.13139e+06	2.12846e+06	24258.2	12226.4	12016.2	13079.6	15557.6	410649	13792.6	14510.4	11319.1	20429	19450.9	12218	2.86858e+06	72831.2	36630.9	709173
A3203	A3203_1,2-Dipalmitoyl-3-succinylglycerol	HMDB0244091	POS	1.068	669.53	C39 H72 O8	1,2-Dipalmitoyl-3-succinylglycerol	-8.83634374986286e-05	-0.132177164653571	NA	4	HMDB	NA	HMDB0244091	Lipids and lipid-like molecules	Triradylcglycerols	Glycerolipids	Glycerolipids[GL]	NA	NA	NA	507700	678085	208419	647242	446791	101375	280614	181818	950518	355841	112144	195098	1.21814e+06	41372.3	1.455e+06	330249	363839	134457	202719	185566	429850
A4263	A4263_1,2-Ethanediamine propylene oxide ethylene oxide polymer	HMDB0259449	NEG	0.756	699.502	C34 H72 N2 O12	1,2-Ethanediamine propylene oxide ethylene oxide polymer	0.00070899404897772	1.01211337665501	NA	4	HMDB	NA	HMDB0259449	Organic nitrogen compounds	Amines	Organonitrogen compounds	Amines	NA	NA	NA	709932	617234	317358	231165	138086	172167	348688	1.48391e+06	2.0714e+06	2.15756e+06	624499	851899	1.53008e+07	470791	554207	4.52701e+06	498536	9.62205e+06	774709	605145	2.10386e+06
A3760	A3760_1,2-Ethanediol monoricinoleate	HMDB0252073	NEG	0.602	341.27	C20 H38 O4	1,2-Ethanediol monoricinoleate	0.00027933133929991	0.81609728820326	NA	4	HMDB	NA	HMDB0252073	Lipids and lipid-like molecules	Fatty alcohols	Fatty Acyls	Fatty acyls[FA]	NA	NA	NA	3.72782e+06	2.09996e+06	48241.5	2.79015e+06	1.29769e+06	197537	292698	159248	4.21169e+06	709640	163721	108041	995692	335980	1.33675e+07	208184	65109.6	71093.9	292444	145854	1.56442e+06
A3146	A3146_1,2-O-Isopropylidene-D-glucofuranose	HMDB0242729	NEG	9.748	219.088	C9 H16 O6	1,2-O-Isopropylidene-D-glucofuranose	0.00019331098772568	0.878308283639342	NA	4	HMDB	NA	HMDB0242729	Organic oxygen compounds	Ethers	Organooxygen compounds	Ethers	NA	NA	NA	1.47121e+06	1.15878e+06	1.96656e+06	1.10426e+06	1.23186e+06	500677	1.67338e+06	821119	593437	1.21276e+06	52646.5	1.27785e+06	780447	1.55614e+06	459766	117584	2.02321e+06	833383	932411	34966.9	990122
C1422	C1422_1,2-di(3,4-dimethoxyphenyl)diaz-1-ene	5.106_325.11629	POS	5.106	325.116	C16 H18 N2 O4	1,2-di(3,4-dimethoxyphenyl)diaz-1-ene	21.9823594964319	72758.7552818862	44.1006210199398	3	mzCloud	NA	NA	NA	NA	NA	NA	NA	NA	NA	1.37903e+06	1.22872e+06	256229	1.06826e+06	922324	55461.9	1.03638e+06	489390	944088	1.0718e+06	210524	1.10039e+06	790447	125773	1.32904e+06	392269	855316	434027	760648	49632.2	724986
A283	A283_1,2-dihydroxyheptadec-16-yn-4-yl acetate	3.395_365.20893	POS	3.395	365.209	C19 H34 O4	1,2-dihydroxyheptadec-16-yn-4-yl acetate	37.955948718466	116341.602732321	62.9522502638543	2	mzCloud	NA	NA	NA	NA	NA	NA	NA	NA	NA	650810	2.41156e+06	84365	3.35517e+06	110989	268165	69669.9	233758	3.58428e+06	2.18962e+06	947411	236921	4.78571e+06	121761	1.94885e+07	1.83294e+06	190664	301060	1.49949e+06	960737	2.16618e+06
A1881	A1881_1,25-dihydroxy-2,4-dinor-1,3-secovitamin D3 / 1,25-dihydroxy-2,4-dinor-1,3-secocholecalciferol	0.759_389.30659	NEG	0.759	389.307	C25 H42 O3	1,25-dihydroxy-2,4-dinor-1,3-secovitamin D3 / 1,25-dihydroxy-2,4-dinor-1,3-secocholecalciferol	0.00045699094170004	1.17083079259883	NA	4	NA	NA	NA	NA	NA	NA	NA	NA	NA	NA	6.58506e+06	6.9584e+06	504615	1.02595e+07	3.38323e+06	1.97122e+06	7.93313e+06	4.80567e+06	1.05542e+07	2.41802e+06	3.84165e+06	3.90014e+06	1.06351e+07	3.71865e+06	1.97723e+07	4.14653e+06	5.91266e+06	3.68826e+06	1.59446e+06	3.54857e+06	5.80657e+06
A3761	A3761_1,3,2-Dioxathiolane 2,2-dioxide	HMDB0252075	NEG	2.008	122.976	C2 H4 O4 S	1,3,2-Dioxathiolane 2,2-dioxide	0.00033312421692244	2.68685334612477	NA	4	HMDB	NA	HMDB0252075	Organic acids and derivatives	Sulfuric acid esters	Organic sulfuric acids and derivatives	Organic acids	NA	NA	NA	4.92392e+08	4.55937e+08	3.59041e+08	2.46425e+08	2.56849e+08	2.63394e+08	1.82368e+08	4.51534e+08	2.7545e+08	4.11654e+08	1.7076e+08	1.77144e+08	1.76942e+08	2.91637e+08	2.53829e+08	1.70421e+08	2.96464e+08	1.50015e+08	3.50233e+08	1.55503e+08	2.794e+08
C1966	C1966_1,3,4,10-Tetrahydro-9(2H)-acridinone	Reference4042	POS	6.661	200.107	C13 H13 N O	1,3,4,10-Tetrahydro-9(2H)-acridinone	0.00034770152845453	1.74636879926407	44.5571280927321	3	mzCloud	NA	NA	NA	NA	NA	NA	NA	NA	NA	61667.4	68571	4.51993e+06	106706	303070	59495.8	842671	1.85649e+06	153317	3.14592e+06	63542	45414.5	9.52077e+06	1.83423e+06	61381.2	56131.2	54181.2	259211	47627.8	77683.1	1.1569e+06
C4020	C4020_1,3,5-Hexatriene	HMDB0251502	POS	8.938	161.133	C6 H8	1,3,5-Hexatriene	9.30800688934141e-05	1.16259113012058	NA	4	HMDB	NA	HMDB0251502	Hydrocarbons	Olefins	Unsaturated hydrocarbons	Olefins	NA	NA	NA	1.00554e+06	1.43672e+06	884988	1.01171e+06	1.28984e+06	1.59747e+07	1.55133e+06	2.12038e+06	1.24682e+06	838983	2.73868e+06	1.33265e+06	1.6272e+06	5.14986e+06	988717	9.50709e+06	2.51265e+06	2.72199e+06	998042	4.17542e+06	2.95567e+06
C3452	C3452_1,3,7-Trimethyl-8-(3-chlorostyryl)xanthine	HMDB0244192	POS	4.067	331.096	C16 H15 Cl N4 O2	1,3,7-Trimethyl-8-(3-chlorostyryl)xanthine	0.00059325832984313	1.79727131788286	NA	4	HMDB	NA	HMDB0244192	Organoheterocyclic compounds	Purines and purine derivatives	Imidazopyrimidines	Purines and derivatives	NA	NA	NA	1.15293e+06	1.18873e+06	253550	1.40283e+06	692254	195457	1.44237e+06	612846	1.42036e+06	1.15142e+06	129663	606923	452051	1.13987e+06	518350	287635	1.05747e+06	178271	368954	195102	722352
C4319	C4319_1,3,7-Trimethyl-8-nonylpurine-2,6-dione	HMDB0255344	POS	9.746	303.217	C17 H28 N4 O2	1,3,7-Trimethyl-8-nonylpurine-2,6-dione	-0.0009755361317616	-3.04644430922185	NA	4	HMDB	NA	HMDB0255344	Organoheterocyclic compounds	Purines and purine derivatives	Imidazopyrimidines	Purines and derivatives	NA	NA	NA	5.15166e+06	4.85225e+06	2.17859e+06	3.90676e+06	5.19068e+06	1.20241e+07	4.29232e+06	4.22442e+06	5.05125e+06	4.86078e+06	1.01043e+07	5.57961e+06	3.98532e+06	4.10581e+06	5.44437e+06	8.54813e+06	4.00086e+06	4.00424e+06	5.45912e+06	1.41723e+07	5.85684e+06
A1435	A1435_1,3,7-Trimethyluric acid	HMDB0002123	NEG	10.793	209.067	C8 H10 N4 O3	1,3,7-Trimethyluric acid	-0.00104264480467009	-4.96319583409248	52.8527088653659	3	mzCloud	C16361	HMDB0002123	Organoheterocyclic compounds	Purines and purine derivatives	Imidazopyrimidines	Purines and derivatives	Biosynthesis of other secondary metabolites	Caffeine metabolism	map00232 Caffeine metabolism;	1.23261e+06	926624	2.99838e+06	812474	1.81817e+06	1.27179e+06	1.5185e+06	2.07875e+06	1.13244e+06	1.00426e+06	1.19593e+06	1.74125e+06	1.10686e+06	8.82758e+06	789708	918777	1.42382e+06	1.67105e+06	1.53674e+06	956897	1.74813e+06
C1162	C1162_1,3,7-trimethyl-8-[2-(1-methyl-2-phenylethylidene)hydrazino]-3,7-dihydro-1H-purine-2,6-dione	3.482_341.17112	POS	3.482	341.171	C17 H20 N6 O2	1,3,7-trimethyl-8-[2-(1-methyl-2-phenylethylidene)hydrazino]-3,7-dihydro-1H-purine-2,6-dione	-0.00092674988792396	-2.72441463462305	44.749931067618	3	mzCloud	NA	NA	NA	NA	NA	NA	NA	NA	NA	6.14096e+06	8.34396e+06	3.06471e+06	8.1815e+06	3.10828e+06	1.30245e+06	3.23766e+06	3.6778e+06	2.84768e+06	7.60959e+06	1.24154e+06	1.56451e+06	1.36585e+06	2.35279e+06	1.01883e+07	746786	2.25262e+06	2.43897e+06	2.93025e+06	1.73365e+06	3.71649e+06
C4056	C4056_1,3-Bis(tetrahydro-2-furanyl)-5-fluoro-2,4-pyrimidinedione	HMDB0252180	POS	5.991	271.108	C12 H15 F N2 O4	1,3-Bis(tetrahydro-2-furanyl)-5-fluoro-2,4-pyrimidinedione	-0.0010681533427146	-3.95463559577728	NA	4	HMDB	NA	HMDB0252180	Organoheterocyclic compounds	Pyrimidines and pyrimidine derivatives	Diazines	Pyrimidines and pyrimidine derivatives	NA	NA	NA	2.89938e+06	2.57808e+06	3.06965e+06	4.05758e+06	2.58994e+06	1.0506e+06	2.68058e+06	1.94135e+06	2.12375e+06	2.03158e+06	411834	2.12111e+06	2.01403e+06	1.53918e+06	3.23402e+06	617786	2.63723e+06	1.74991e+06	2.35144e+06	714886	2.1207e+06
C3450	C3450_1,3-Butyleneglycol dimethacrylate	HMDB0244160	NEG	3.595	225.113	C12 H18 O4	1,3-Butyleneglycol dimethacrylate	-0.00021446184189244	-0.948440470516322	NA	4	HMDB	NA	HMDB0244160	Organic acids and derivatives	Dicarboxylic acids and derivatives	Carboxylic acids and derivatives	Organic acids	NA	NA	NA	4.70571e+06	4.80658e+06	3.58484e+06	6.84041e+06	5.51962e+06	1.92315e+06	7.12448e+06	3.6326e+06	4.02602e+06	2.57671e+06	963654	4.03016e+06	2.86742e+06	3.98077e+06	6.66682e+06	1.31111e+06	4.75931e+06	1.78471e+06	5.11391e+06	1.24696e+06	3.87325e+06
C3451	C3451_1,3-Cyclohexanedione	HMDB0244161	POS	3.407	113.06	C6 H8 O2	1,3-Cyclohexanedione	0.00042796874650719	3.81936160283211	NA	4	HMDB	NA	HMDB0244161	Organic oxygen compounds	Carbonyl compounds	Organooxygen compounds	Carbonyl compounds	NA	NA	NA	3.53329e+06	3.48239e+06	4.66528e+06	5.17264e+06	7.13692e+06	3.95631e+06	2.63221e+06	2.40966e+06	2.25993e+06	5.25279e+06	5.71334e+06	3.34731e+06	5.96939e+06	4.75637e+06	5.31917e+06	4.50837e+06	2.71991e+06	3.51015e+06	6.05073e+06	5.69423e+06	4.40452e+06
A276	A276_1,3-Dihydro-1,3,3-trimethyl-2H-indol-2-ylidene acetaldehyde	3.218_202.12300	POS	3.218	202.123	C13 H15 N O	1,3-Dihydro-1,3,3-trimethyl-2H-indol-2-ylidene acetaldehyde	0.0003595102193401	1.78758207279843	87.280334689153	2	mzCloud	NA	NA	NA	NA	NA	NA	NA	NA	NA	1.13135e+06	546940	2.53058e+06	825617	469357	339685	2.50389e+06	1.39516e+06	1.28868e+06	931985	2.73935e+07	2.47699e+06	3.12978e+06	133031	2.03211e+06	3.55166e+07	2.88334e+06	3.90202e+06	316375	722662	4.52348e+06
C2047	C2047_1,3-Dihydroxy-1-(7-methoxy-2-oxo-2H-chromen-6-yl)-3-methyl-2-butanyl 3-methylbutanoate	Reference7831	POS	6.556	379.175	C20 H26 O7	1,3-Dihydroxy-1-(7-methoxy-2-oxo-2H-chromen-6-yl)-3-methyl-2-butanyl 3-methylbutanoate	0.00032535677814848	0.860350174095036	33.6429365094297	3	mzCloud	NA	NA	NA	NA	NA	NA	NA	NA	NA	2.56863e+06	2.24861e+06	2.4692e+06	2.19455e+06	1.802e+06	948949	2.20374e+06	1.32377e+06	1.39354e+06	1.81885e+06	207973	1.59503e+06	2.0698e+06	2.19259e+06	2.67865e+06	636743	3.11392e+06	1.5365e+06	608875	435933	1.70239e+06
C4373	C4373_1,3-Dimethoxy-5-methyl-2-(3-methyl-6-prop-1-en-2-ylcyclohex-2-en-1-yl)benzene	HMDB0255837	POS	6.042	269.19	C19 H26 O2	1,3-Dimethoxy-5-methyl-2-(3-methyl-6-prop-1-en-2-ylcyclohex-2-en-1-yl)benzene	0.00027981485078498	0.977712861757417	NA	4	HMDB	NA	HMDB0255837	Lipids and lipid-like molecules	Monoterpenoids	Prenol lipids	Terpenoids	NA	NA	NA	473886	310012	283725	428935	319923	118665	381656	220125	301843	312193	66905.6	309287	305061	1.97631e+06	327263	80731.6	577649	360579	306053	77978.7	376939
C180	C180_1,3-Dimethyl-6-morpholino-1,2,3,4-tetrahydropyrimidine-2,4-dione	2.947_226.11928	POS	2.947	226.119	C10 H15 N3 O3	1,3-Dimethyl-6-morpholino-1,2,3,4-tetrahydropyrimidine-2,4-dione	0.00065932563177284	2.92888678158877	66.7877571145879	2	mzCloud	NA	NA	NA	NA	NA	NA	NA	NA	NA	9.37335e+06	7.93692e+06	5.68761e+06	1.2093e+07	3.84548e+06	1.4807e+06	8.34329e+06	5.02112e+06	5.898e+06	4.9729e+06	3.54502e+06	7.49813e+06	5.31041e+06	6.64927e+06	3.55607e+06	1.97756e+06	1.02367e+07	3.14697e+06	7.18483e+06	931588	5.73445e+06
C2035	C2035_1,3-Divinyl-2-imidazolidinone	Reference7413	POS	3.514	139.087	C7 H10 N2 O	1,3-Divinyl-2-imidazolidinone	0.0003397912890648	2.46084139563245	25.3278556942387	3	mzCloud	NA	NA	NA	NA	NA	NA	NA	NA	NA	4.3052e+06	4.58513e+06	2.35432e+06	5.22519e+06	3.63767e+06	2.12202e+06	4.3288e+06	2.88831e+06	4.89911e+06	5.11266e+06	2.19926e+06	2.29266e+06	5.23375e+06	1.82702e+06	4.5537e+06	2.22882e+06	1.64408e+06	2.97621e+06	3.68922e+06	2.98588e+06	3.45445e+06
C4738	C4738_1,3-Propanediol, 2-((3-fluoranthenylmethyl)amino)-2-methyl-	HMDB0259557	POS	4.11	320.164	C21 H21 N O2	1,3-Propanediol, 2-((3-fluoranthenylmethyl)amino)-2-methyl-	-0.00089743360138072	-2.81188555456078	NA	4	HMDB	NA	HMDB0259557	Benzenoids	NA	Naphthalenes	Benzene and derivatives	NA	NA	NA	254579	197862	3.46514e+06	630505	503554	39010.4	1.87523e+06	1.82791e+06	226867	328655	173393	1.29471e+06	1.51537e+06	2.46861e+06	191005	110204	1.32717e+06	1.34527e+06	168162	56791.1	900000
A1201	A1201_1,3-bis(4-fluorobenzyl)-2-(2-furyl)hexahydropyrimidine	2.898_369.38394	POS	2.898	369.384	C22 H22 F2 N2 O	1,3-bis(4-fluorobenzyl)-2-(2-furyl)hexahydropyrimidine	0.20664364371936	561.27232714438	56.6334189167269	3	mzCloud	NA	NA	NA	NA	NA	NA	NA	NA	NA	91998.7	54855.4	2.18377e+06	321293	44283.4	78345.4	22500.4	6.28795e+06	373447	225219	239957	24714.9	220795	2.19845e+06	135335	385273	316990	106137	22318.5	4.03919e+06	868641
C143	C143_1,3-diazaspiro[4.5]decane-2,4-dione	0.737_169.09724	POS	0.737	169.097	C8 H12 N2 O2	1,3-diazaspiro[4.5]decane-2,4-dione	8.88215816132742e-05	0.528417195030493	73.6969440292515	2	mzCloud	NA	NA	NA	NA	NA	NA	NA	NA	NA	7.76862e+06	6.68629e+06	7.53174e+06	7.1983e+06	5.94484e+06	2.32287e+07	4.93418e+06	7.03234e+06	7.0853e+06	6.05977e+06	2.88834e+07	6.45319e+06	6.30508e+06	6.80715e+06	5.8854e+06	1.20808e+07	7.30249e+06	8.73151e+06	6.49928e+06	1.49166e+07	9.36675e+06
C276	C276_1,3-dimethyl 2,4-bis(4-hydroxyphenyl)cyclobutane-1,3-dicarboxylate	4.205_374.15963	POS	4.205	374.16	C20 H20 O6	1,3-dimethyl 2,4-bis(4-hydroxyphenyl)cyclobutane-1,3-dicarboxylate	17.0263690966671	47809.9595671885	68.7469532130048	2	mzCloud	NA	NA	NA	NA	NA	NA	NA	NA	NA	8.52351e+06	8.56356e+06	6.47976e+06	6.89952e+06	5.46005e+06	1.02596e+06	8.20002e+06	5.78968e+06	4.42774e+06	7.50845e+06	1.19881e+06	6.69116e+06	5.80812e+06	1.24988e+06	3.91265e+06	2.06674e+06	9.81567e+06	2.19405e+06	5.11996e+06	75399.4	5.05053e+06
C295	C295_1,3-dipyridin-3-ylpropane-1,3-dione	4.549_227.08162	POS	4.549	227.082	C13 H10 N2 O2	1,3-dipyridin-3-ylpropane-1,3-dione	0.00011805593845792	0.522199897632862	74.810524467503	2	mzCloud	NA	NA	NA	NA	NA	NA	NA	NA	NA	4.20705e+07	5.00167e+07	2.63838e+07	1.06761e+07	2.35084e+07	7.27805e+06	4.61309e+07	1.72458e+07	3.54932e+07	1.75504e+07	5.29529e+06	2.23155e+07	1.03321e+07	4.83729e+06	3.71562e+07	3.39786e+06	2.61305e+07	1.17872e+07	3.88729e+07	1.48617e+06	2.18982e+07
C3458	C3458_1,4,10,13-Tetraoxa-7,16-diazacyclooctadecane	HMDB0244223	POS	1.703	263.196	C12 H26 N2 O4	1,4,10,13-Tetraoxa-7,16-diazacyclooctadecane	-0.00073302874994851	-2.79580009430086	NA	4	HMDB	NA	HMDB0244223	Organic nitrogen compounds	Amines	Organonitrogen compounds	Amines	NA	NA	NA	3.27549e+06	1.15671e+06	1.88896e+06	6.50568e+06	1.80468e+06	2.28267e+07	1.42942e+07	1.42416e+07	2.53327e+06	3.71534e+06	3.21889e+07	2.17552e+07	6.39111e+06	1.54555e+07	4.74123e+06	1.951e+07	5.956e+06	8.19503e+06	1.47606e+06	6.28895e+07	1.25401e+07
A3270	A3270_1,4,7,10,13,16-Hexaoxacyclooctadecane	HMDB0244804	NEG	2.601	263.15	C12 H24 O6	1,4,7,10,13,16-Hexaoxacyclooctadecane	-4.83110937352649e-05	-0.182887604739267	NA	4	HMDB	NA	HMDB0244804	Organic oxygen compounds	Ethers	Organooxygen compounds	Ethers	NA	NA	NA	3.08079e+06	5.59556e+06	2.91597e+07	3.56515e+06	3.5635e+06	787148	1.59497e+07	4.63038e+06	6.7582e+06	1.29921e+07	1.25085e+06	6.40143e+06	1.47459e+07	2.62362e+06	1.73984e+06	1.06068e+06	1.70536e+07	1.63647e+07	6.37904e+06	1.27101e+06	7.74865e+06
A3209	A3209_1,4,8,11-Tetraoxacyclotetradecane	HMDB0244226	NEG	3.413	203.129	C10 H20 O4	1,4,8,11-Tetraoxacyclotetradecane	0.00036455195652251	1.78582745118918	NA	4	HMDB	NA	HMDB0244226	Organic oxygen compounds	Ethers	Organooxygen compounds	Ethers	NA	NA	NA	5.44038e+06	6.59987e+06	1.79727e+07	8.4171e+06	1.63621e+07	6.07744e+06	6.69766e+06	9.32393e+06	3.51023e+06	6.11294e+06	369060	5.1085e+06	2.90277e+06	1.09439e+07	3.6465e+06	1.03503e+06	4.68634e+06	5.70661e+06	6.71522e+06	1.25859e+06	6.44434e+06
C1772	C1772_1,4-Androstadiene-3,17-dione	HMDB0003422	POS	6.994	285.185	C19 H24 O2	1,4-Androstadiene-3,17-dione	-0.00022683737091711	-0.798223881946542	53.1727604481842	3	mzCloud	C20144	HMDB0003422	Lipids and lipid-like molecules	Androstane steroids	Steroids and steroid derivatives	Steroids and derivatives	Xenobiotics biodegradation and metabolism	Steroid degradation	map01100 Metabolic pathways;	2.35575e+06	2.13742e+06	2.15687e+06	2.5813e+06	2.54983e+06	873998	2.33666e+06	1.86391e+06	1.96368e+06	2.35928e+06	248373	1.73683e+06	2.16899e+06	1.52528e+06	2.56836e+06	611600	2.79152e+06	1.57189e+06	1.59134e+06	483377	1.82381e+06
A3207	A3207_1,4-Benzothiazepine	HMDB0244197	NEG	2.736	160.023	C9 H7 N S	1,4-Benzothiazepine	0.00022964480470477	1.42610022307112	NA	4	HMDB	NA	HMDB0244197	Organosulfur compounds	Aryl thioethers	Thioethers	Aryl thioethers	NA	NA	NA	876670	1.90043e+06	195208	1.88663e+06	444844	768377	232157	205106	3.95163e+06	233163	248123	455547	270036	268431	1.37998e+07	337527	215947	211968	1.02132e+06	252122	1.38875e+06
C3453	C3453_1,4-Bisdesoxycyadox	HMDB0244200	POS	3.198	240.087	C12 H9 N5 O	1,4-Bisdesoxycyadox	-0.00090191981036014	-3.77244910662412	NA	4	HMDB	NA	HMDB0244200	Organoheterocyclic compounds	Benzodiazines	Diazanaphthalenes	Benzodiazines	NA	NA	NA	6.80635e+06	7.00618e+06	1.5918e+06	7.33821e+06	3.70861e+06	898333	3.95805e+06	3.99933e+06	1.31521e+07	6.64126e+06	997204	6.98941e+06	4.14803e+06	3.00167e+06	8.05369e+06	5.04666e+06	7.94128e+06	3.03117e+06	4.79621e+06	609835	4.98577e+06
C3454	C3454_1,4-Butanediol diglycidyl ether	HMDB0244203	POS	3.574	203.128	C10 H18 O4	1,4-Butanediol diglycidyl ether	0.00019003703627618	0.940216493975846	NA	4	HMDB	NA	HMDB0244203	Organoheterocyclic compounds	NA	Epoxides	Epoxides	NA	NA	NA	546050	390121	805707	594566	823399	1.5122e+06	2.5977e+06	3.70623e+06	416892	1.23156e+06	302802	918138	1.67551e+06	3.05922e+06	400423	1.77466e+06	547298	2.95968e+06	4.07223e+06	1.07318e+06	1.47038e+06
A3942	A3942_1,4-Di[3-(3-isothiocyanatophenyl)thioureido]butane	HMDB0254928	NEG	12.728	471.056	C20 H20 N6 S4	1,4-Di[3-(3-isothiocyanatophenyl)thioureido]butane	0.00053726710933688	1.13812531489904	NA	4	HMDB	NA	HMDB0254928	Benzenoids	N-phenylthioureas	Benzene and substituted derivatives	Benzene and derivatives	NA	NA	NA	636388	474596	689928	369624	613809	292838	582316	325860	101696	604964	24782	514317	410269	639316	16389.2	22653.5	791965	421700	429364	24336.8	399356
C3455	C3455_1,4-Dihydroxy-2-naphthoic acid	HMDB0244212	POS	5.95	205.05	C11 H8 O4	1,4-Dihydroxy-2-naphthoic acid	0.00017943008052157	0.879377055113596	NA	4	HMDB	NA	HMDB0244212	Benzenoids	Naphthalenecarboxylic acids and derivatives	Naphthalenes	Benzene and derivatives	NA	NA	NA	1.17061e+06	977992	1.01203e+06	908061	753426	164825	1.02472e+06	758720	565645	803178	132945	662957	474364	392841	1.30038e+06	242965	1.20366e+06	555973	337905	188539	681587
A1189	A1189_1,4-Dioxa-8-azaspiro[4.5]dec-8-yl(5-methyl-3-isoxazolyl)methanone	2.672_235.10800	POS	2.672	235.108	C12 H16 N2 O4	1,4-Dioxa-8-azaspiro[4.5]dec-8-yl(5-methyl-3-isoxazolyl)methanone	0.00027645077932447	1.09654387067703	24.5711193794141	3	mzCloud	NA	NA	NA	NA	NA	NA	NA	NA	NA	1.04885e+07	8.85066e+06	6.08913e+06	1.08832e+07	9.0316e+06	346505	1.03018e+07	8.0039e+06	5.17634e+06	8.79071e+06	739913	6.96817e+06	8.32969e+06	5.76312e+06	5.64029e+06	451921	1.53708e+07	5.39988e+06	6.97286e+06	447080	6.7023e+06
C1988	C1988_1,4-Dioxa-8-azaspiro[4.5]dec-8-yl(phenyl)methanone	Reference4807	POS	2.929	248.128	C14 H17 N O3	1,4-Dioxa-8-azaspiro[4.5]dec-8-yl(phenyl)methanone	8.98492402257034e-05	0.363584224714677	50.8936809734723	3	mzCloud	NA	NA	NA	NA	NA	NA	NA	NA	NA	301199	1.15816e+06	230027	1.59081e+06	715519	2.5028e+07	624159	261194	966704	409833	1.9026e+08	1.18271e+06	682326	113923	908643	1.02966e+07	716822	239212	7.51641e+06	2.24327e+07	1.32818e+07
C3456	C3456_1,4-Dioxin	HMDB0244218	POS	0.763	102.055	C4 H4 O2	1,4-Dioxin	0.00015482188780424	1.84265421159238	NA	4	HMDB	NA	HMDB0244218	Organoheterocyclic compounds	Para dioxins	Dioxins	Para dioxins	NA	NA	NA	9.95108e+07	9.92104e+07	1.23625e+08	1.36664e+08	1.17014e+08	2.74118e+08	1.42192e+08	1.37811e+08	1.14532e+08	9.42651e+07	6.99958e+07	1.87375e+08	1.405e+08	1.38021e+08	1.32956e+08	1.89087e+08	1.05237e+08	3.7279e+07	1.07032e+08	1.27934e+08	1.28718e+08
C4400	C4400_1,4-Divinylbenzene	HMDB0256036	POS	5.135	131.086	C10 H10	1,4-Divinylbenzene	0.00031417409113032	2.41526996562258	NA	4	HMDB	NA	HMDB0256036	Benzenoids	Styrenes	Benzene and substituted derivatives	Benzene and derivatives	NA	NA	NA	3.77432e+06	4.727e+06	1.71334e+06	2.95703e+06	5.41617e+06	748826	3.83307e+06	2.31844e+06	2.12364e+06	1.57832e+06	423121	4.18604e+06	1.85691e+06	1.59144e+06	3.30072e+06	674477	1.90269e+06	1.02996e+06	5.83745e+06	827369	2.54102e+06
C3457	C3457_1,4-Naphthoquinone	HMDB0244221	POS	4.272	159.044	C10 H6 O2	1,4-Naphthoquinone	0.00034754706626927	2.1991530555909	NA	4	HMDB	NA	HMDB0244221	Benzenoids	Naphthoquinones	Naphthalenes	Quinone	NA	NA	NA	9.19646e+06	1.08109e+07	9.90956e+06	8.73224e+06	1.79862e+07	2.8826e+06	6.34995e+06	1.27266e+07	9.25714e+06	1.14038e+07	1.8419e+06	6.69921e+06	8.48046e+06	1.4682e+07	1.10906e+07	6.01468e+06	1.86972e+07	6.70634e+06	7.15443e+06	2.32668e+06	9.14744e+06
C308	C308_1,4-dihydroxy-1,4-dimethyl-7-(propan-2-ylidene)-decahydroazulen-6-one	4.813_235.16930	POS	4.813	235.169	C15 H24 O3	1,4-dihydroxy-1,4-dimethyl-7-(propan-2-ylidene)-decahydroazulen-6-one	-18.0105248853515	-71421.4345563822	89.1513167291073	2	mzCloud	NA	NA	NA	NA	NA	NA	NA	NA	NA	1.09088e+06	1.05554e+06	1.13603e+06	1.10907e+06	972730	516592	636358	734825	831650	723886	925304	820178	724705	1.11229e+08	1.49138e+06	1.96208e+06	854110	1.40089e+06	848573	6.74772e+06	6.79058e+06
C525	C525_1,4-dihydroxyheptadec-16-en-2-yl acetate	9.418_351.25051	POS	9.418	351.251	C19 H36 O4	1,4-dihydroxyheptadec-16-en-2-yl acetate	-7.56268104282753e-05	-0.230385966073119	82.7607728835418	2	mzCloud	NA	NA	NA	NA	NA	NA	NA	NA	NA	1.02903e+07	9.02607e+06	7.88705e+06	1.08268e+07	1.84682e+07	3.55362e+08	1.12418e+07	1.11268e+08	7.66754e+06	1.98258e+07	3.99645e+07	2.69491e+07	4.80471e+07	3.16236e+07	6.40361e+06	3.87283e+07	2.95075e+07	3.25977e+07	1.68335e+07	2.05289e+07	4.26524e+07
A1715	A1715_1,4:3,6-Dianhydro-2,5-dideoxy-2-(5-phenoxy-1H-tetrazol-1-yl)-5-[(phenylcarbamoyl)amino]-L-iditol	Reference8839	NEG	2.018	407.146	C20 H20 N6 O4	1,4:3,6-Dianhydro-2,5-dideoxy-2-(5-phenoxy-1H-tetrazol-1-yl)-5-[(phenylcarbamoyl)amino]-L-iditol	-0.00096406531253023	-2.36201014381366	4.39843598814404	3	mzCloud	NA	NA	NA	NA	NA	NA	NA	NA	NA	1.84179e+06	1.30563e+06	4.20323e+07	2.36798e+06	1.02932e+06	99414.7	1.11218e+06	942279	2.25241e+06	766773	204466	691123	1.5611e+06	1.72648e+06	5.46376e+06	262874	852446	773705	1.77944e+06	803655	3.39346e+06
C2075	C2075_1,4:3,6-Dianhydro-2-deoxy-2-(2-furoylamino)-5-O-[(4-methoxyphenyl)carbamoyl]-D-glucitol	Reference8958	POS	4.418	389.135	C19 H20 N2 O7	1,4:3,6-Dianhydro-2-deoxy-2-(2-furoylamino)-5-O-[(4-methoxyphenyl)carbamoyl]-D-glucitol	0.00019385064041443	0.49945150696113	35.949602200477	3	mzCloud	NA	NA	NA	NA	NA	NA	NA	NA	NA	1.10064e+06	411302	2.01406e+06	496188	252363	583477	1.58147e+06	871390	284006	126988	58145	168505	183294	4.82124e+06	1.19431e+06	371370	2.72901e+06	595019	782266	157538	939129
A1228	A1228_1,4:3,6-Dianhydro-2-deoxy-5-O-(2-methoxy-2-oxoethyl)-2-({[3-(trifluoromethyl)phenyl]carbamoyl}amino)-D-glucitol	3.346_405.12657	POS	3.346	405.127	C17 H19 F3 N2 O6	1,4:3,6-Dianhydro-2-deoxy-5-O-(2-methoxy-2-oxoethyl)-2-({[3-(trifluoromethyl)phenyl]carbamoyl}amino)-D-glucitol	-0.00022387342312413	-0.553978245588259	30.1486450629927	3	mzCloud	NA	NA	NA	NA	NA	NA	NA	NA	NA	3.0955e+06	981150	1.47835e+06	477037	1.80135e+06	855033	1.43034e+06	3.48278e+06	1.31833e+06	1.08398e+06	1.16685e+06	1.24901e+06	4.74369e+06	2.79715e+06	316196	4.09378e+06	2.50323e+06	4.87576e+06	1.95988e+06	2.94464e+06	2.1327e+06
C1145	C1145_1,4:3,6-Dianhydro-2-deoxy-5-O-(ethylcarbamoyl)-2-[(phenylcarbamoyl)amino]-D-glucitol	3.358_336.15589	POS	3.358	336.156	C16 H21 N3 O5	1,4:3,6-Dianhydro-2-deoxy-5-O-(ethylcarbamoyl)-2-[(phenylcarbamoyl)amino]-D-glucitol	0.00046977911682688	1.40170595599286	36.4059754585046	3	mzCloud	NA	NA	NA	NA	NA	NA	NA	NA	NA	4.46327e+07	3.59776e+07	3.3399e+07	3.29694e+07	1.2959e+07	3.71302e+06	3.32592e+07	1.02395e+07	2.4029e+07	1.134e+07	3.53158e+06	1.51593e+07	2.22852e+07	1.55603e+07	4.12327e+07	6.85395e+06	1.77892e+07	1.24691e+07	2.46916e+07	1.48353e+06	2.01787e+07
A1719	A1719_1,4:3,6-Dianhydro-2-{[(2-cyanophenyl)sulfonyl]amino}-2-deoxy-5-O-methyl-D-glucitol	Reference8949	NEG	4.066	323.07	C14 H16 N2 O5 S	1,4:3,6-Dianhydro-2-{[(2-cyanophenyl)sulfonyl]amino}-2-deoxy-5-O-methyl-D-glucitol	-0.00095236640629536	-2.93869509585953	57.1072100794208	3	mzCloud	NA	NA	NA	NA	NA	NA	NA	NA	NA	630460	338876	6.18983e+06	816133	2.75571e+06	692010	860057	507176	258332	873295	557188	678011	262472	340998	447619	741459	563140	252233	607909	735977	955445
A151	A151_1,4a-dimethyl-9-oxo-7-(propan-2-yl)-1,2,3,4,4a,9,10,10a-octahydrophenanthrene-1-carboxylic acid	1.306_337.17588	POS	1.306	337.176	C20 H26 O3	1,4a-dimethyl-9-oxo-7-(propan-2-yl)-1,2,3,4,4a,9,10,10a-octahydrophenanthrene-1-carboxylic acid	21.9804122040143	69959.3828895997	69.7918860992335	2	mzCloud	NA	NA	NA	NA	NA	NA	NA	NA	NA	6.75133e+06	5.85635e+06	60531.9	4.68332e+06	7.04776e+06	321508	3.85386e+06	2.88088e+06	2.99681e+06	7.57827e+06	168550	1.59133e+06	3.14229e+06	1.30906e+06	2.48181e+06	774547	5.24239e+06	4.25388e+06	4.88035e+06	209825	3.30423e+06
A554	A554_1,5-Anhydro-D-glucitol	HMDB0002712	NEG	8.499	163.061	C6 H12 O5	1,5-Anhydro-D-glucitol	0.00026410429924794	1.6097199775148	77.1365122130532	2	mzCloud	C07326	HMDB0002712	Organic oxygen compounds	Carbohydrates and carbohydrate conjugates	Organooxygen compounds	Carbohydrates	NA	NA	NA	5.8254e+06	3.93201e+06	1.18884e+07	4.18295e+06	7.99316e+06	4.01626e+06	6.5483e+06	7.00891e+06	2.39062e+06	4.23815e+06	2.02642e+06	3.51817e+06	4.46567e+06	1.01831e+07	3.19918e+06	1.62572e+06	7.53035e+06	6.32741e+06	4.31346e+06	2.83197e+06	5.20228e+06
C1766	C1766_1,5-Anhydrosorbitol	HMDB0002712	POS	4.508	182.082	C6 H12 O5	1,5-Anhydrosorbitol	-0.0208037411863131	-126.799139165911	37.5133567758586	3	Decode	C07326	HMDB0002712	Organic oxygen compounds	Carbohydrates and carbohydrate conjugates	Organooxygen compounds	Carbohydrates	NA	NA	NA	4.59672e+06	4.21532e+06	3.60764e+06	6.29458e+06	3.54285e+06	4.96565e+06	4.34082e+06	4.54857e+06	4.51943e+06	4.84608e+06	5.98283e+06	5.16395e+06	4.56146e+06	3.66862e+06	4.72946e+06	2.65286e+06	4.08957e+06	2.51941e+06	6.09127e+06	4.44273e+06	4.46899e+06
C4732	C4732_1,5-Dihydro-7-(1-piperidinyl)-imidazo(2,1-b)quinazolin-2(3H)-one	HMDB0259407	POS	4.42	271.154	C15 H18 N4 O	1,5-Dihydro-7-(1-piperidinyl)-imidazo(2,1-b)quinazolin-2(3H)-one	-0.00128503562496007	-4.75678270477804	NA	4	HMDB	NA	HMDB0259407	Organoheterocyclic compounds	Benzodiazines	Diazanaphthalenes	Benzodiazines	NA	NA	NA	3.11911e+06	3.28437e+06	1.4416e+07	3.7029e+06	3.2836e+06	1.28511e+06	2.7106e+06	3.00463e+06	2.62874e+06	2.464e+06	545997	1.36918e+06	1.89216e+06	4.31157e+06	3.23684e+06	1.83011e+06	3.92474e+06	2.1466e+06	2.92169e+06	887107	3.14825e+06
A3984	A3984_1,5-Dinitrocyclohexa-1,4-diene	HMDB0255345	NEG	1.008	169.026	C6 H6 N2 O4	1,5-Dinitrocyclohexa-1,4-diene	8.39770945901819e-05	0.493887744216338	NA	4	HMDB	NA	HMDB0255345	Organic 1,3-dipolar compounds	Organic nitro compounds	Allyl-type 1,3-dipolar organic compounds	Organic nitro compounds	NA	NA	NA	480332	300675	256383	293669	1.26798e+06	1.35472e+06	268183	111757	963715	387063	1.79308e+06	1.31364e+06	384203	75892.7	1.08448e+06	877299	108637	202037	702194	983814	660487
A270	A270_1,5-Ditetrahydro-1H-pyrrol-1-ylpentane-1,5-dione	3.053_239.17552	POS	3.053	239.176	C13 H22 N2 O2	1,5-Ditetrahydro-1H-pyrrol-1-ylpentane-1,5-dione	0.00011677391231046	0.490300332625136	68.5451951184338	2	mzCloud	NA	NA	NA	NA	NA	NA	NA	NA	NA	4.77928e+06	5.81151e+06	7.81573e+06	4.37871e+06	5.75997e+06	3.72383e+06	3.88846e+06	5.49764e+06	1.58941e+06	3.44282e+06	767237	5.00703e+06	2.52351e+06	1.22824e+07	2.63714e+06	1.01977e+06	4.39346e+06	2.23027e+06	8.74883e+06	941632	4.36193e+06
C841	C841_1,5-Isoquinolinediol	Reference2549	POS	4.554	162.055	C9 H7 N O2	1,5-Isoquinolinediol	0.00026590046374508	1.65106672986708	91.5944650494292	2	mzCloud	NA	NA	NA	NA	NA	NA	NA	NA	NA	1.09886e+08	9.7884e+07	9.02445e+07	1.06341e+08	7.8377e+07	6.73423e+07	1.23062e+08	9.64173e+07	5.28531e+07	3.6814e+07	3.5199e+07	4.84365e+07	4.74702e+07	6.15327e+07	7.47717e+07	9.26097e+07	1.03941e+08	9.16662e+07	1.4731e+08	1.34139e+08	8.48148e+07
C559	C559_1,5-Naphthalenediamine	C19463	POS	2.499	159.092	C10 H10 N2	1,5-Naphthalenediamine	0.00024396657599368	1.54326789118494	71.3523353900714	2	mzCloud	C19463	NA	Benzenoids	NA	Naphthalenes	Benzene and derivatives	NA	NA	NA	6.34987e+06	2.02784e+07	4.19395e+06	1.24755e+07	2.552e+07	1.0716e+07	2.18033e+07	1.81984e+07	1.42554e+07	5.2127e+06	7.74322e+06	2.65155e+07	4.59731e+06	4.2192e+06	2.44329e+07	5.80883e+06	1.46878e+07	4.34334e+06	2.16705e+07	5.86162e+06	1.29442e+07
C277	C277_1,5-dimethyl-3-oxo-2-phenyl-2,3-dihydro-1H-pyrazole-4-carbaldehyde oxime	4.219_232.10839	POS	4.219	232.108	C12 H13 N3 O2	1,5-dimethyl-3-oxo-2-phenyl-2,3-dihydro-1H-pyrazole-4-carbaldehyde oxime	0.00033910270568071	1.46733693709011	78.8511624223677	2	mzCloud	NA	NA	NA	NA	NA	NA	NA	NA	NA	2.33449e+06	2.10608e+06	2.01003e+06	2.4227e+06	1.77741e+06	937648	1.92928e+06	1.41423e+06	1.68174e+06	1.9007e+06	428293	1.74311e+06	1.71032e+06	2.03721e+06	2.62823e+06	699544	2.54253e+06	1.46771e+06	2.0109e+06	9.12651e+06	2.14543e+06
C4514	C4514_1,6-Bis(cyclohexyloximinocarbonyl)hexane	HMDB0257195	POS	8.9	395.267	C20 H34 N4 O4	1,6-Bis(cyclohexyloximinocarbonyl)hexane	0.00141625507404797	3.59220372085848	NA	4	HMDB	NA	HMDB0257195	Organic acids and derivatives	NA	Carboximidic acids and derivatives	Organic acids	NA	NA	NA	3.23727e+06	1.46609e+07	3.33697e+06	2.48799e+07	1.18499e+06	584049	586928	4.75947e+06	2.98545e+06	1.72697e+07	3.22582e+06	2.63725e+06	1.43536e+07	465611	1.41491e+07	465037	1.16173e+06	3.40841e+06	5.52737e+06	375718	5.96276e+06
C2623	C2623_1,6-Dihydroxycyclohexa-2,4-diene-1-carboxylate; 1,2-Dihydroxycyclohexa-3,5-diene-1-carboxylate;	C04634	POS	2.649	157.05	C7 H8 O4	1,6-Dihydroxycyclohexa-2,4-diene-1-carboxylate; 1,2-Dihydroxycyclohexa-3,5-diene-1-carboxylate;	1.76842700057023e-05	0.113330005344905	NA	4	KEGG	C04634	NA	NA	NA	NA	NA	NA	NA	NA	4.21003e+06	8.07375e+06	2.43974e+07	1.26575e+06	7.40512e+06	2.42136e+06	1.80447e+06	3.29017e+06	4.03949e+07	3.37393e+06	3.03095e+06	3.38019e+06	1.1916e+07	3.79052e+06	1.75088e+06	2.24298e+06	902341	2.99926e+06	918793	1.34672e+07	7.0518e+06
C2849	C2849_1,6-Dimethoxypyrene;	C18260	POS	0.736	263.106	C18 H14 O2	1,6-Dimethoxypyrene;	-0.0004107814822305	-1.56727376778254	NA	4	KEGG	C18260	NA	Benzenoids	NA	Pyrenes	Benzene and derivatives	Xenobiotics biodegradation and metabolism	Polycyclic aromatic hydrocarbon degradation	NA	2.46119e+06	2.33699e+06	1.39498e+07	3.41002e+06	3.0377e+06	8.01531e+06	3.6392e+06	1.7063e+07	2.3211e+06	2.47395e+06	1.49893e+07	1.23257e+07	2.31863e+07	1.2059e+07	1.05895e+07	1.68205e+07	1.27264e+07	2.32179e+07	1.0569e+07	2.28899e+07	1.09041e+07
C467	C467_1,6-Hexanediol diacrylate	7.498_227.12799	POS	7.498	227.128	C12 H18 O4	1,6-Hexanediol diacrylate	0.00016866750223698	0.745918638816352	81.5285889486315	2	mzCloud	NA	NA	NA	NA	NA	NA	NA	NA	NA	9.51628e+06	9.70817e+06	8.31658e+06	8.22479e+06	9.90882e+06	1.84122e+07	7.34267e+06	1.04451e+07	9.87421e+06	1.11484e+07	2.16499e+07	1.02094e+07	9.54656e+06	7.53402e+06	8.32024e+06	1.45733e+07	7.80649e+06	1.16062e+07	1.08625e+07	2.88251e+07	1.16915e+07
C1431	C1431_1,6-dihydroxy-3-methoxy-8-methyl-9H-xanthen-9-one	5.172_273.07584	POS	5.172	273.076	C15 H12 O5	1,6-dihydroxy-3-methoxy-8-methyl-9H-xanthen-9-one	8.61916406620367e-05	0.316801280198269	51.8504618303368	3	mzCloud	NA	NA	NA	NA	NA	NA	NA	NA	NA	33592.6	32056.6	32713.1	33459.8	34781.5	77745.3	33093.9	48861.7	27834	31701.8	76234.4	33046.6	100859	3.93387e+06	34022.5	73519.1	37177.2	44583	33701	110107	243148
C2328	C2328_1,6-dihydroxy-8-(hydroxymethyl)-4,12,12,15-tetramethyl-14-[(2-methylpropanoyl)oxy]-5-oxotetracyclo[8.5.0.0	7.34_533.31177	POS	7.34	533.312	C30 H44 O8	1,6-dihydroxy-8-(hydroxymethyl)-4,12,12,15-tetramethyl-14-[(2-methylpropanoyl)oxy]-5-oxotetracyclo[8.5.0.0	0.00085272969579364	1.60196111160268	17.5091980378964	4	Public	NA	NA	NA	NA	NA	NA	NA	NA	NA	65431.5	45755.8	42581.6	47431	42668.5	67256.7	106840	51593.5	43057.7	48442.6	70289.2	44668.7	47862.6	1.61404e+07	78560.8	54032.4	110774	43165.1	44217.8	86857.5	864094
C3902	C3902_1,7-Bis(4-hydroxy-3-methoxyphenyl)-1,4,6-heptatrien-3-one	HMDB0250024	POS	1.064	353.137	C21 H20 O5	1,7-Bis(4-hydroxy-3-methoxyphenyl)-1,4,6-heptatrien-3-one	-0.00099061085938956	-2.81318785434664	NA	4	HMDB	NA	HMDB0250024	Phenylpropanoids and polyketides	Linear diarylheptanoids	Diarylheptanoids	Polyketides[PK]	NA	NA	NA	285466	248446	249886	231286	255058	4.58099e+06	255119	357776	236509	222417	1.50394e+07	293324	258967	2.05427e+06	284457	4.92469e+06	271362	300278	271084	9.65805e+06	2.01394e+06
C3459	C3459_1,7-Octadiene	HMDB0244246	POS	9.977	111.117	C8 H14	1,7-Octadiene	0.00019814682045193	1.7995425437315	NA	4	HMDB	NA	HMDB0244246	Hydrocarbons	Olefins	Unsaturated hydrocarbons	Olefins	NA	NA	NA	3.31148e+07	3.36073e+07	3.37836e+07	3.33853e+07	2.56693e+08	1.25614e+08	2.91655e+07	5.7277e+07	3.40436e+07	4.00612e+07	5.32394e+07	3.59755e+07	3.75276e+07	2.75944e+07	3.05285e+07	8.75272e+07	3.52609e+07	3.26171e+07	4.07773e+07	9.41742e+07	5.75984e+07
A3211	A3211_1,8,9-Trihydroxyanthracene	HMDB0244253	NEG	8.444	225.056	C14 H10 O3	1,8,9-Trihydroxyanthracene	-0.00017547781249049	-0.776234134158532	NA	4	HMDB	NA	HMDB0244253	Benzenoids	NA	Anthracenes	Benzene and derivatives	NA	NA	NA	513235	1.22784e+06	1.55993e+06	130853	129240	1.8078e+06	1.22777e+06	1.06058e+06	1.39015e+06	1.26028e+06	690482	1.77697e+06	1.98508e+06	80044.6	130284	559782	578864	2.17765e+06	565815	836780	984472
A700	A700_1,8-Diazabicyclo [5.4.0]undec-7-ene	Reference3088	POS	2.504	153.139	C9 H16 N2	1,8-Diazabicyclo [5.4.0]undec-7-ene	0.00028299124025466	1.86017703176978	82.0091970615541	2	mzCloud	NA	NA	NA	NA	NA	NA	NA	NA	NA	1.49505e+07	2.03564e+07	5.23392e+07	1.13522e+07	1.78279e+07	1.6284e+07	2.19833e+07	1.85158e+07	3.74527e+07	1.71597e+07	6.67504e+07	3.36597e+07	2.60802e+07	1.97549e+07	3.37076e+07	7.2262e+07	2.11442e+07	2.08646e+07	3.05201e+07	2.64143e+07	2.8969e+07
A3212	A3212_1,9-Heptadecadiene-4,6-diyn-3-ol, (3R,9Z)-	HMDB0244256	POS	8.855	245.19	C17 H24 O	1,9-Heptadecadiene-4,6-diyn-3-ol, (3R,9Z)-	-0.00026416679685326	-1.08184068846589	NA	4	HMDB	NA	HMDB0244256	Lipids and lipid-like molecules	Fatty alcohols	Fatty Acyls	Fatty acyls[FA]	NA	NA	NA	7982.51	8708.81	8024.04	7008.48	7467.28	15305.8	8793.74	8210.3	11009.1	8601.72	28117.5	8873.58	10858.1	2.47088e+06	16787.2	20910.2	9514.65	8804.98	8637.64	25561.5	135003
C3651	C3651_1-(1,3-Benzodioxol-5-yl)-4,4-dimethyl-1-penten-3-ol	HMDB0246697	POS	5.229	235.133	C14 H18 O3	1-(1,3-Benzodioxol-5-yl)-4,4-dimethyl-1-penten-3-ol	0.00023144699218846	0.988559122896903	NA	4	HMDB	NA	HMDB0246697	Organoheterocyclic compounds	NA	Benzodioxoles	Benzodioxoles	NA	NA	NA	4.69073e+06	4.4222e+06	3.82307e+06	5.64948e+06	5.94511e+06	2.67802e+06	4.50992e+06	3.28909e+06	3.88169e+06	2.6959e+06	484893	3.63435e+06	3.76348e+06	6.63988e+06	5.72633e+06	1.37676e+06	4.83856e+06	3.91346e+06	5.65847e+06	1.28324e+06	3.94523e+06
A3172	A3172_1-(1,3-Benzodioxol-5-ylcarbonyl)piperidine	HMDB0243831	POS	0.906	234.113	C13 H15 N O3	1-(1,3-Benzodioxol-5-ylcarbonyl)piperidine	0.0002117416577505	0.90835238288072	NA	4	HMDB	NA	HMDB0243831	Organoheterocyclic compounds	N-acylpiperidines	Piperidines	N-acylpiperidines	NA	NA	NA	1.3568e+06	1.29864e+06	241366	2.62389e+06	887410	164627	403595	460146	529348	556943	522441	238093	1.19528e+06	214144	1.0163e+06	477485	174800	438444	2.30634e+06	724118	791511
C3722	C3722_1-(1-(Tert-Butoxycarbonyl)piperidin-4-yl)azetidine-3-carboxylic acid	HMDB0247560	POS	4.892	302.207	C14 H24 N2 O4	1-(1-(Tert-Butoxycarbonyl)piperidin-4-yl)azetidine-3-carboxylic acid	-0.00029056008793304	-1.02247387038427	NA	4	HMDB	NA	HMDB0247560	Organoheterocyclic compounds	Piperidinecarboxylic acids and derivatives	Piperidines	Piperidinecarboxylic acids and derivatives	NA	NA	NA	3.47499e+06	2.31657e+06	2.05651e+07	4.79631e+06	5.29525e+06	3.10642e+06	1.81381e+07	2.35749e+07	2.1788e+06	6.08741e+06	2.02312e+06	2.18541e+07	1.50598e+07	4.0598e+07	2.67797e+06	5.94179e+06	1.62223e+07	2.21105e+07	4.0877e+06	910542	1.1051e+07
C3424	C3424_1-(1-Hydroxy-2,2,6,6-tetramethylpiperidin-4-yl)-1h-pyrrole-2,5-dione	HMDB0243771	POS	2.67	253.154	C13 H20 N2 O3	1-(1-Hydroxy-2,2,6,6-tetramethylpiperidin-4-yl)-1h-pyrrole-2,5-dione	-0.00022880854217532	-0.907439652647106	NA	4	HMDB	NA	HMDB0243771	Organoheterocyclic compounds	Pyrrolidones	Pyrrolidines	Pyrrolidones	NA	NA	NA	1.10393e+07	1.05413e+07	1.79487e+07	1.20623e+07	1.03866e+07	1.58572e+07	1.38773e+07	5.7486e+06	8.07126e+06	1.50527e+07	8.82556e+06	1.23341e+07	1.17583e+07	4.9575e+06	2.14128e+07	4.39372e+06	1.76178e+07	4.33082e+06	1.20069e+07	4.60028e+06	1.11412e+07
A757	A757_1-(1-Hydroxybutyl)-1,3,4,5,6,7-hexahydro-2-benzofuran-4,5,6,7-tetrol	Reference7619	NEG	10.957	259.119	C12 H20 O6	1-(1-Hydroxybutyl)-1,3,4,5,6,7-hexahydro-2-benzofuran-4,5,6,7-tetrol	9.09300666762647e-06	0.0349561638594727	63.1361283596844	2	mzCloud	NA	NA	NA	NA	NA	NA	NA	NA	NA	1.89111e+06	2.08375e+06	1.42153e+07	4.18656e+06	6.15923e+06	1.52484e+06	6.43106e+06	1.49218e+07	1.18935e+06	2.70078e+06	54432.4	4.80956e+06	1.98597e+06	1.24923e+07	337232	2.40738e+06	4.0539e+06	8.90619e+06	2.37689e+07	49562.2	5.70846e+06
A4189	A4189_1-(1-Methoxybutan-2-yl)-N-(4-methoxy-2-methylphenyl)-6-methyltriazolo[4,5-c]pyridin-4-amine	HMDB0258349	POS	0.929	356.207	C19 H25 N5 O2	1-(1-Methoxybutan-2-yl)-N-(4-methoxy-2-methylphenyl)-6-methyltriazolo[4,5-c]pyridin-4-amine	-0.00140602335932272	-3.95838990385407	NA	4	HMDB	NA	HMDB0258349	Organoheterocyclic compounds	NA	Triazolopyridines	Pyridine and derivatives	NA	NA	NA	443764	779744	373912	427181	474641	747584	540423	417446	421725	710292	179985	438909	250012	1.89335e+06	363645	197346	1.11123e+06	183471	329819	232789	525863
C4897	C4897_1-(1-hydroxybutyl)-1,3,4,5,6,7-hexahydro-2-benzofuran-4,5,6,7-tetrol	PB01418	POS	4.862	261.133	C12 H20 O6	1-(1-hydroxybutyl)-1,3,4,5,6,7-hexahydro-2-benzofuran-4,5,6,7-tetrol	-5.87806827070381e-05	-0.225970050565821	27.8720887462146	4	Public	NA	NA	NA	NA	NA	NA	NA	NA	NA	3.29243e+06	3.09453e+06	2.27652e+06	3.61665e+06	3.32062e+06	308198	2.491e+06	1.9792e+06	2.84984e+06	3.57291e+06	402064	2.9555e+06	3.73936e+06	850573	3.84959e+06	768670	3.14296e+06	1.67799e+06	1.96828e+06	144100	2.31505e+06
C1032	C1032_1-(1-methyl-4-nitro-1H-imidazol-5-yl)-4-piperidinecarboxamide	0.947_254.12470	POS	0.947	254.125	C10 H15 N5 O3	1-(1-methyl-4-nitro-1H-imidazol-5-yl)-4-piperidinecarboxamide	-6.91434396173918e-05	-0.273167373073537	46.3238895850335	3	mzCloud	NA	NA	NA	NA	NA	NA	NA	NA	NA	2.96226e+06	253560	841061	654982	5.27731e+06	1.02698e+07	2.49771e+06	8.41763e+06	739736	225060	2.83925e+07	2.78581e+06	4.35367e+06	3.51755e+06	294902	2.20327e+07	5.60726e+06	9.38272e+06	796908	3.92522e+07	7.42777e+06
C355	C355_1-(2,2-Dimethylpropanoyl)pyrrolidine-2-carboxylic acid	5.478_200.12849	POS	5.478	200.128	C10 H17 N O3	1-(2,2-Dimethylpropanoyl)pyrrolidine-2-carboxylic acid	0.00037485769118461	1.88256379871303	64.0225597963185	2	mzCloud	NA	NA	NA	NA	NA	NA	NA	NA	NA	3.03242e+06	2.56701e+06	1.00238e+07	3.50468e+06	2.45582e+06	5.74751e+06	4.56169e+06	4.47003e+06	5.96249e+06	3.89243e+06	2.85728e+07	2.12552e+06	3.74588e+06	2.84289e+06	3.69544e+06	4.28017e+06	2.4801e+06	3.53346e+06	5.78253e+06	2.94448e+06	5.31106e+06
A3388	A3388_1-(2,4,6-Trimethylphenoxy)propan-2-amine	HMDB0246512	POS	2.488	194.155	C12 H19 N O	1-(2,4,6-Trimethylphenoxy)propan-2-amine	0.00058495683595083	3.02856297552195	NA	4	HMDB	NA	HMDB0246512	Benzenoids	NA	Phenol ethers	Benzene and derivatives	NA	NA	NA	958695	1.77584e+06	1.54272e+06	1.50086e+06	1.6106e+06	223987	1.18504e+06	550410	1.57417e+06	526088	2.0449e+06	530214	491835	1.9986e+06	8.1664e+06	1.30683e+06	2.50354e+06	550100	822036	1.25312e+06	1.5558e+06
C935	C935_1-(2,4-Dihydroxyquinolin-3-yl)ethan-1-one	Reference8698	POS	5.223	204.066	C11 H9 N O3	1-(2,4-Dihydroxyquinolin-3-yl)ethan-1-one	0.00032250614330564	1.58824452743082	87.6205585231722	2	mzCloud	NA	NA	NA	NA	NA	NA	NA	NA	NA	1.88721e+06	2.1612e+06	3.42686e+06	1.26352e+06	3.26488e+06	1.22597e+07	2.46826e+06	1.61163e+06	5.94036e+06	6.50297e+06	7.96707e+06	1.83277e+06	2.91021e+06	426868	4.73777e+06	4.06196e+06	1.27066e+06	2.22489e+06	6.1781e+06	434028	3.64154e+06
A1538	A1538_1-(2,4-dihydroxyphenyl)-2-(3,5-dimethoxyphenyl)propan-1-one	PB00458	POS	1.406	320.148	C17 H18 O5	1-(2,4-dihydroxyphenyl)-2-(3,5-dimethoxyphenyl)propan-1-one	17.025004908125	56352.6506149095	36.9154010586924	3	Public	NA	NA	NA	NA	NA	NA	NA	NA	NA	41079.6	45730.4	1.4112e+07	61552.3	40051.9	45983.4	35235.9	36158.1	48861.8	37463.9	172644	29523.9	41445	43614.3	478268	85393.6	112509	31867.4	38724	86836.1	781245
C1081	C1081_1-(2,4-diphenyl-2,3-dihydro-1H-1,5-benzodiazepin-1-yl)propan-1-one	2.645_377.15541	POS	2.645	377.155	C24 H22 N2 O	1-(2,4-diphenyl-2,3-dihydro-1H-1,5-benzodiazepin-1-yl)propan-1-one	21.974923256454	62045.6952522891	20.9657528306639	3	mzCloud	NA	NA	NA	NA	NA	NA	NA	NA	NA	2.53488e+06	2.9242e+06	8.06228e+06	914332	3.71661e+06	1.06349e+06	2.36089e+06	2.06415e+06	4.00887e+06	5.19408e+06	1.29465e+06	1.41498e+06	3.566e+06	3.31045e+06	1.64012e+06	1.65047e+06	5.0389e+06	2.60105e+06	6.04873e+06	2.04357e+06	3.07264e+06
A723	A723_1-(2-Furylmethyl)-5-oxopyrrolidine-3-carboxylic acid	Reference4356	NEG	12.876	208.062	C10 H11 N O4	1-(2-Furylmethyl)-5-oxopyrrolidine-3-carboxylic acid	0.00029734799409197	1.42224943701782	75.3149203904619	2	mzCloud	NA	NA	NA	NA	NA	NA	NA	NA	NA	303250	654573	1.05967e+07	468853	1.10664e+06	370626	675501	32831.9	384626	3.74582e+06	270229	661729	350271	252648	48517.6	252741	798307	1.51199e+06	1.21488e+07	55613.3	1.73451e+06
A1598	A1598_1-(2-Hydroxy-2-phenylethyl)-3-[3-(trifluoromethyl)phenyl]urea	Reference3667	NEG	4.011	323.102	C16 H15 F3 N2 O2	1-(2-Hydroxy-2-phenylethyl)-3-[3-(trifluoromethyl)phenyl]urea	0.00060003319617862	1.8513339851719	19.764934772788	3	mzCloud	NA	NA	NA	NA	NA	NA	NA	NA	NA	5.42992e+06	7.12881e+06	6.34507e+06	4.71352e+06	4.81769e+06	3.35165e+06	4.28149e+06	1.03235e+07	4.54925e+06	3.26287e+07	5.47663e+06	2.70658e+06	4.65809e+06	1.31003e+07	2.36486e+06	7.47774e+06	3.15753e+06	6.58772e+06	5.33985e+06	1.01767e+07	7.23078e+06
A3437	A3437_1-(2-Hydroxyethoxy)methyl-5-methyluracil	HMDB0247200	NEG	3.84	199.073	C8 H12 N2 O4	1-(2-Hydroxyethoxy)methyl-5-methyluracil	0.00039110178556711	1.9547299018998	NA	4	HMDB	NA	HMDB0247200	Organoheterocyclic compounds	Pyrimidines and pyrimidine derivatives	Diazines	Pyrimidines and pyrimidine derivatives	NA	NA	NA	1.55535e+06	585097	3.23617e+06	5.40129e+06	1.14668e+06	87649.6	775404	2.87371e+06	707318	690251	170451	548323	997892	1.63565e+06	666484	667201	4.50067e+06	842723	660513	475604	1.41122e+06
A3166	A3166_1-(2-Hydroxyethyl-2-hydroxymethyl)-5-nitro-imidazole	HMDB0243779	NEG	10.584	186.052	C6 H9 N3 O4	1-(2-Hydroxyethyl-2-hydroxymethyl)-5-nitro-imidazole	0.00029334769530464	1.56820690771811	NA	4	HMDB	NA	HMDB0243779	Organoheterocyclic compounds	Imidazoles	Azoles	Imidazoles	NA	NA	NA	17860.5	18297.2	27385.1	16062.1	20621.8	24144.7	21094.1	18598.7	15650.5	20495.9	30926.3	20017.9	23898.6	2.46907e+06	22064	26926.9	21120.2	18219.5	17624.8	31773.7	144093
C4193	C4193_1-(2-Methyl-4-methoxyphenyl)-4-((2-hydroxyethyl)amino)-6-trifluoromethoxy-2,3-dihydropyrrolo(3,2-c)quinoline	HMDB0253820	POS	2.753	434.167	C22 H22 F3 N3 O3	1-(2-Methyl-4-methoxyphenyl)-4-((2-hydroxyethyl)amino)-6-trifluoromethoxy-2,3-dihydropyrrolo(3,2-c)quinoline	-0.00186201267717934	-4.29865864091804	NA	4	HMDB	NA	HMDB0253820	Organoheterocyclic compounds	Pyrroloquinolines	Quinolines and derivatives	Pyrroloquinolines	NA	NA	NA	1.91672e+06	1.50368e+06	1.80981e+06	859315	1.39306e+06	1.94809e+06	2.23007e+06	1.90032e+06	4.06463e+06	3.17197e+06	2.55412e+06	1.52643e+06	5.38305e+06	2.34887e+06	800770	6.67501e+06	834892	2.69518e+06	1.51322e+06	7.38849e+06	2.62588e+06
C314	C314_1-(2-Morpholinophenyl)dihydro-1H-pyrrole-2,5-dione	4.846_261.12351	POS	4.846	261.124	C14 H16 N2 O3	1-(2-Morpholinophenyl)dihydro-1H-pyrrole-2,5-dione	0.00014026984791826	0.539258631362451	62.202488772951	2	mzCloud	NA	NA	NA	NA	NA	NA	NA	NA	NA	513975	1.28731e+06	5.38708e+06	5.83941e+06	9.1023e+06	693202	3.65614e+06	2.6543e+07	5.1201e+06	3.30519e+06	1.32978e+06	2.44629e+06	3.09885e+06	1.77031e+06	805429	2.61767e+06	1.62932e+06	4.84549e+06	9.05403e+06	633585	4.48392e+06
A352	A352_1-(2-chlorobenzyl)-2,4-dioxo-1,2,3,4-tetrahydropyrimidine-5-carbonitrile	9.99_260.02350	NEG	9.99	260.024	C12 H8 Cl N3 O2	1-(2-chlorobenzyl)-2,4-dioxo-1,2,3,4-tetrahydropyrimidine-5-carbonitrile	0.00027143606610025	1.03986339448921	61.0782471124534	2	mzCloud	NA	NA	NA	NA	NA	NA	NA	NA	NA	1.08154e+06	784040	2.80911e+06	860770	1.50316e+06	421335	1.35009e+06	1.32389e+06	328394	1.0254e+06	50109	942901	648678	1.7383e+06	249260	53587.3	2.44734e+06	771000	903037	48416.4	967018
C309	C309_1-(2-furyl)pentane-1,4-dione	4.816_189.05251	POS	4.816	189.053	C9 H10 O3	1-(2-furyl)pentane-1,4-dione	21.9822433971194	132372.919784176	69.4410709707784	2	mzCloud	NA	NA	NA	NA	NA	NA	NA	NA	NA	1.02905e+07	2.36884e+07	2.29253e+07	1.59854e+07	8.40316e+06	1.74516e+07	1.94165e+07	1.71803e+07	3.99276e+07	2.63118e+07	4.23333e+07	1.5483e+07	3.14401e+07	7.60048e+06	2.22958e+07	2.23432e+07	1.70327e+07	2.26342e+07	3.0486e+07	5.64449e+07	2.34837e+07
A2321	A2321_1-(2-methoxy-13-methyl-pentadecanyl)-sn-glycero-3-phosphoserine	4.705_512.29933	NEG	4.705	512.299	C23 H48 N O9 P	1-(2-methoxy-13-methyl-pentadecanyl)-sn-glycero-3-phosphoserine	-6.27194095841332e-05	-0.122187015000143	NA	4	NA	NA	NA	NA	NA	NA	NA	NA	NA	NA	76923.3	64711.1	106648	28474.9	183380	204083	75673.1	81357.4	131007	61386.8	7.82926e+06	94025	147007	125101	339392	9.96663e+06	99754.7	88408.6	120918	6.40324e+07	4.19283e+06
A185	A185_1-(2-methoxy-4-nitrophenyl)pyrrolidine	1.708_223.10831	POS	1.708	223.108	C11 H14 N2 O3	1-(2-methoxy-4-nitrophenyl)pyrrolidine	0.00058663445491902	2.64130250734906	68.1830409583212	2	mzCloud	NA	NA	NA	NA	NA	NA	NA	NA	NA	1.20604e+08	1.04135e+08	9.60971e+07	1.35985e+08	1.24211e+08	6.79219e+06	1.22639e+08	6.47139e+07	7.73217e+07	9.60773e+07	6.49661e+06	1.10628e+08	7.19049e+07	4.15976e+07	7.20107e+07	9.2575e+06	1.49201e+08	7.38585e+07	9.72011e+07	1.33513e+06	7.91033e+07
A2268	A2268_1-(2-methoxy-5Z,9Z-hexacosadienyl)-sn-glycero-3-phosphoserine	3.366_650.43842	POS	3.366	650.438	C33 H64 N O9 P	1-(2-methoxy-5Z,9Z-hexacosadienyl)-sn-glycero-3-phosphoserine	-0.00072067051792146	-1.10969379933711	NA	4	NA	NA	NA	NA	NA	NA	NA	NA	NA	NA	131940	89290.8	70724.3	72734.1	131362	317388	82458	276665	390924	70322.9	4.86291e+06	110029	195397	144111	439302	2.1403e+06	225661	356320	96934.3	2.10629e+06	615553
C2118	C2118_1-(2-methoxy-5Z-hexadecenyl)-sn-glycero-3-phosphoserine	10.126_512.29907	POS	10.126	512.299	C23 H46 N O9 P	1-(2-methoxy-5Z-hexadecenyl)-sn-glycero-3-phosphoserine	0.00077735562507541	1.52037801815973	NA	4	NA	NA	NA	NA	NA	NA	NA	NA	NA	NA	133513	131818	107828	107527	135057	273345	109524	123610	134388	151410	532048	140455	142157	112607	121062	560072	117166	130625	128805	7.03282e+06	521292
C2105	C2105_1-(2-methoxy-6Z-heptadecenyl)-sn-glycero-3-phosphoserine	10.013_524.29819	NEG	10.013	524.298	C24 H48 N O9 P	1-(2-methoxy-6Z-heptadecenyl)-sn-glycero-3-phosphoserine	-0.00119378224826505	-2.27254348785915	NA	4	NA	NA	NA	NA	NA	NA	NA	NA	NA	NA	2.29783e+06	3.16398e+06	1.95246e+06	873092	8.0388e+06	3.9218e+07	9.82599e+06	4.85141e+06	1.42093e+06	4.81499e+06	8.64782e+07	1.47068e+07	1.08432e+06	504500	1.26053e+06	6.92864e+07	6.84092e+06	7.82405e+06	9.53746e+06	4.53628e+08	3.63804e+07
C2380	C2380_1-(2-methoxy-docosanyl)-sn-glycero-3-phosphoethanolamine	8.788_554.42043	POS	8.788	554.42	C28 H60 N O7 P	1-(2-methoxy-docosanyl)-sn-glycero-3-phosphoethanolamine	0.00241671740673155	4.36695068280573	NA	4	NA	NA	NA	NA	NA	NA	NA	NA	NA	NA	1.71527e+06	1.73162e+06	2.24534e+06	1.63646e+06	821103	117281	1.80184e+06	1.10855e+06	1.44587e+06	869602	172090	1.13203e+06	1.15873e+06	1.34827e+06	1.73502e+06	176043	2.65931e+06	1.18946e+06	1.42093e+06	182352	1.23336e+06
C2156	C2156_1-(2-methoxy-docosanyl)-sn-glycero-3-phosphoserine	10.833_596.39307	NEG	10.833	596.393	C29 H60 N O9 P	1-(2-methoxy-docosanyl)-sn-glycero-3-phosphoserine	-0.00022566375002952	-0.377742777380663	NA	4	NA	NA	NA	NA	NA	NA	NA	NA	NA	NA	5624.92	5658.43	5914.72	5335.16	6132.3	250145	5034.77	5137.73	5449.3	6325.82	1.1192e+06	45714.4	6281.77	4978.52	5207.19	1.01771e+06	4936.44	41199	9817.37	8.93618e+06	574599
C2540	C2540_1-(2-methoxy-heneicosanyl)-sn-glycero-3-phosphoethanolamine	9.914_540.40414	POS	9.914	540.404	C27 H58 N O7 P	1-(2-methoxy-heneicosanyl)-sn-glycero-3-phosphoethanolamine	0.00151396575495255	2.80678446020773	NA	4	NA	NA	NA	NA	NA	NA	NA	NA	NA	NA	51155.8	56310.1	53451.5	46686.2	54406.6	1.58008e+06	51628.4	59912.2	60880.8	66950	2.45469e+06	62800.2	59314.2	44633.3	50175.4	2.17526e+06	50862.3	86439.9	54911.7	1.31292e+07	1.01249e+06
C2150	C2150_1-(2-methoxy-heneicosanyl)-sn-glycero-3-phosphoserine	10.542_582.37738	NEG	10.542	582.377	C28 H58 N O9 P	1-(2-methoxy-heneicosanyl)-sn-glycero-3-phosphoserine	-0.00026163890629504	-0.448484179030521	NA	4	NA	NA	NA	NA	NA	NA	NA	NA	NA	NA	4925.63	4995.79	4373.34	4430.73	4986.63	72227.4	4558.56	4486.32	4564.64	5708.32	517725	11777.8	5187.83	4050.91	4615.63	405786	4397.9	5262.13	7549.36	6.71048e+06	389604
C2111	C2111_1-(2-methoxy-nonadecanyl)-sn-glycero-3-phosphoserine	10.072_554.34640	NEG	10.072	554.346	C26 H54 N O9 P	1-(2-methoxy-nonadecanyl)-sn-glycero-3-phosphoserine	5.49944494423471e-05	0.0990260036279327	NA	4	NA	NA	NA	NA	NA	NA	NA	NA	NA	NA	152843	197904	16327.5	53199.9	481886	1.85023e+06	303863	212977	149444	129578	5.51003e+06	549776	21560.1	349582	150508	6.7109e+06	346612	364847	406491	8.08966e+07	4.94276e+06
A1869	A1869_1-(2-methoxy-octadecanyl)-sn-glycero-3-phosphoethanolamine	0.747_496.34328	NEG	0.747	496.343	C24 H52 N O7 P	1-(2-methoxy-octadecanyl)-sn-glycero-3-phosphoethanolamine	0.00241800614668364	4.86179791540262	NA	4	NA	NA	NA	NA	NA	NA	NA	NA	NA	NA	1.25955e+06	55245.4	42300.9	832577	245005	178778	970662	97974.9	471873	370537	301995	285846	401821	146471	3.33918e+06	186695	1.21311e+06	495085	266539	292636	572694
A2312	A2312_1-(2-methoxy-octadecanyl)-sn-glycero-3-phosphoserine	4.555_540.33026	NEG	4.555	540.33	C25 H52 N O9 P	1-(2-methoxy-octadecanyl)-sn-glycero-3-phosphoserine	-0.00042857577614086	-0.791697241115516	NA	4	NA	NA	NA	NA	NA	NA	NA	NA	NA	NA	2.63837e+07	1.33616e+07	318497	8.4496e+06	3.17273e+07	4.56179e+07	2.21659e+07	1.05762e+07	3.4406e+07	7.59303e+06	7.42786e+08	3.38545e+07	7.97177e+06	1.89415e+07	4.07202e+07	1.14584e+09	4.66834e+07	2.60885e+07	2.81028e+07	3.19041e+09	2.741e+08
A2151	A2151_1-(2-methoxy-tetradecanyl)-sn-glycero-3-phosphoserine	1.865_484.26615	NEG	1.865	484.266	C21 H44 N O9 P	1-(2-methoxy-tetradecanyl)-sn-glycero-3-phosphoserine	-0.00194099397339187	-3.99977847734468	NA	4	NA	NA	NA	NA	NA	NA	NA	NA	NA	NA	2.23728e+06	2.10681e+06	158212	2.28293e+06	1.65255e+06	482825	141086	674218	7.2145e+06	734647	505291	483262	2.59159e+06	123728	3.98348e+06	5.1778e+06	280576	1.48467e+06	1.06809e+06	1.24435e+06	1.73139e+06
A2563	A2563_1-(3,4-Dihydroxyphenyl)-1-decene-3,5-dione;	C17745	POS	0.894	277.143	C16 H20 O4	1-(3,4-Dihydroxyphenyl)-1-decene-3,5-dione;	-6.4047968749037e-05	-0.231943433199695	NA	4	KEGG	C17745	NA	PK Polyketides	PK1502 Alkyl catechols and derivatives	PK15 Phenolic lipids	Polyketides[PK]	Biosynthesis of other secondary metabolites	Stilbenoid, diarylheptanoid and gingerol biosynthesis	NA	477858	205168	579488	600611	1.03298e+06	321220	408527	591755	388888	270584	1.70242e+06	309595	431274	2.67371e+06	638900	953967	179360	695340	622960	1.27656e+06	718059
A304	A304_1-(3,4-dimethoxyphenyl)ethan-1-one oxime	3.959_196.09708	POS	3.959	196.097	C10 H13 N O3	1-(3,4-dimethoxyphenyl)ethan-1-one oxime	0.00026301118285232	1.34815622893829	66.178460968917	2	mzCloud	NA	NA	NA	NA	NA	NA	NA	NA	NA	6.96059e+06	5.93005e+06	6.87202e+06	7.42477e+06	7.74537e+06	1.6413e+06	6.90951e+06	6.29631e+06	3.66702e+06	5.38055e+06	1.29795e+06	5.95742e+06	3.43767e+06	4.92631e+06	3.60372e+06	3.05355e+06	8.78841e+06	4.85717e+06	5.23018e+06	4.21862e+06	5.20992e+06
C3412	C3412_1-(3-Carboxypropyl)-3,7-dimethylxanthine	HMDB0243498	POS	2.248	267.108	C11 H14 N4 O4	1-(3-Carboxypropyl)-3,7-dimethylxanthine	-0.00059663554685585	-2.24213518544149	4.06963091331933	4	Public	NA	HMDB0243498	Organoheterocyclic compounds	Purines and purine derivatives	Imidazopyrimidines	Purines and derivatives	NA	NA	NA	116618	272461	88821.1	56949.5	136718	2.25034e+06	177815	144642	96751	406830	1.88394e+07	198801	113031	3.02044e+06	113709	896546	386321	269791	477499	246066	1.41548e+06
A3167	A3167_1-(3-Carboxypropylcarbamoyl)-5-fluorouracil	HMDB0243786	NEG	4.118	258.054	C9 H10 F N3 O5	1-(3-Carboxypropylcarbamoyl)-5-fluorouracil	0.00081372570309667	3.14106498235557	NA	4	HMDB	NA	HMDB0243786	Organic acids and derivatives	Amino acids, peptides, and analogues	Carboxylic acids and derivatives	Amino acids, peptides, and analogues	NA	NA	NA	6.25877e+06	3.32102e+06	7.69971e+06	6.20557e+06	3.47202e+06	1.4336e+06	2.5027e+06	2.861e+06	1.07233e+06	3.39288e+06	307953	3.26283e+06	869607	7.37816e+06	1.1735e+06	322618	4.89009e+06	4.71928e+06	1.79774e+06	526036	3.17337e+06
A4309	A4309_1-(3-Chlorophenyl)-3-(4-hydroxy-1-methylimidazol-2-yl)urea	HMDB0260231	NEG	0.73	265.051	C11 H11 Cl N4 O2	1-(3-Chlorophenyl)-3-(4-hydroxy-1-methylimidazol-2-yl)urea	0.00079102695315214	2.97314784009247	NA	4	HMDB	NA	HMDB0260231	Benzenoids	N-phenylureas	Benzene and substituted derivatives	Benzene and derivatives	NA	NA	NA	62672	54102.2	68415.5	83633	74472.5	82364	61796.5	94774.6	76523.3	37778.1	261509	49006.7	63658	93898.9	2.84899e+06	187689	65438.7	53836.4	64097.2	286581	233562
C2081	C2081_1-(3-Cyanophenyl)-3-{[(2R,4S,5R)-5-(3-cyclohexyl-1-methyl-1H-pyrazol-5-yl)-1-azabicyclo[2.2.2]oct-2-yl]methyl}urea	Reference9058	NEG	9.638	491.277	C26 H34 N6 O	1-(3-Cyanophenyl)-3-{[(2R,4S,5R)-5-(3-cyclohexyl-1-methyl-1H-pyrazol-5-yl)-1-azabicyclo[2.2.2]oct-2-yl]methyl}urea	46.0048816876129	103085.378119473	53.7487195624327	3	mzCloud	NA	NA	NA	NA	NA	NA	NA	NA	NA	3.97998e+06	3.74052e+06	5.49707e+06	4.60145e+06	6.55805e+06	465210	4.74182e+06	2.98901e+06	3.44946e+06	6.54521e+06	1.5022e+06	5.65215e+06	4.38304e+06	1.05966e+06	3.85234e+06	1.37189e+06	2.65561e+06	1.60279e+06	4.06347e+06	1.63181e+06	3.51714e+06
A1561	A1561_1-(3-Dimethylaminopropyl)-3-ethylcarbodiimide	Reference1717	POS	12.283	156.15	C8 H17 N3	1-(3-Dimethylaminopropyl)-3-ethylcarbodiimide	0.0001412927049671	0.910730037980096	43.7228760289333	3	mzCloud	NA	NA	NA	NA	NA	NA	NA	NA	NA	6.48303e+07	4.12127e+07	7.06215e+06	5.99337e+07	6.3406e+07	4.01392e+06	8.45183e+06	4.0898e+06	1.33038e+07	2.34875e+07	1.76625e+06	2.05625e+07	3.96042e+06	3.47947e+07	9.26328e+06	1.58575e+06	4.23281e+06	24192.8	4.30222e+06	2.40871e+06	1.86346e+07
C1926	C1926_1-(3-Methylbenzyl)piperazine	Reference2397	POS	4.303	191.155	C12 H18 N2	1-(3-Methylbenzyl)piperazine	0.00023532804686965	1.23761115703412	52.6872330119619	3	mzCloud	NA	NA	NA	NA	NA	NA	NA	NA	NA	27908.2	27163.8	30901.4	29035.1	27137.7	1.22303e+06	30416.6	30648.4	27072	27278.9	1.99984e+07	26164.5	32388.7	42061.6	32815.2	169249	33329.5	32500	28160.1	99679.6	1.09877e+06
C382	C382_1-(3-ethyl-2,4-dihydroxy-6-methoxyphenyl)butan-1-one	5.938_239.12771	POS	5.938	239.128	C13 H18 O4	1-(3-ethyl-2,4-dihydroxy-6-methoxyphenyl)butan-1-one	-6.96233030055282e-05	-0.292386839401017	73.3038471171224	2	mzCloud	NA	NA	NA	NA	NA	NA	NA	NA	NA	3.61824e+07	2.66262e+07	9.87298e+06	2.38418e+07	2.69211e+07	5.25738e+06	2.43856e+07	1.91535e+07	1.67408e+07	1.37176e+07	4.05398e+06	1.64431e+07	1.05642e+07	3.0471e+07	2.60315e+07	9.94767e+06	1.29892e+07	8.30205e+06	1.90608e+07	1.27001e+07	1.76632e+07
C194	C194_1-(3-methoxy-2-nitrostyryl)pyrrolidine	3.272_249.12393	POS	3.272	249.124	C13 H16 N2 O3	1-(3-methoxy-2-nitrostyryl)pyrrolidine	0.00056222837474706	2.26598915685238	62.3640256316063	2	mzCloud	NA	NA	NA	NA	NA	NA	NA	NA	NA	8.86361e+06	1.68286e+07	9.5862e+06	1.31293e+07	1.28354e+07	3.92798e+06	9.32357e+06	9.8128e+06	1.4288e+07	1.04222e+07	7.2874e+06	6.15515e+06	5.86985e+06	1.25425e+06	1.28102e+07	4.70006e+06	8.7057e+06	5.85125e+06	2.06824e+07	1.19344e+06	9.17637e+06
C2022	C2022_1-(4,6-Dimethoxy-1,3,5-triazin-2-yl)-8-methyl-1,2,3,4-tetrahydroquinoline	Reference6611	POS	4.345	287.149	C15 H18 N4 O2	1-(4,6-Dimethoxy-1,3,5-triazin-2-yl)-8-methyl-1,2,3,4-tetrahydroquinoline	-0.00159561352728588	-5.57628060992736	44.1499754025433	3	mzCloud	NA	NA	NA	NA	NA	NA	NA	NA	NA	3.42023e+06	2.47064e+06	4.06341e+06	4.26176e+06	4.22568e+06	1.55887e+06	3.77931e+06	4.05939e+06	1.34482e+06	2.48676e+06	360454	1.87233e+06	1.51412e+06	4.19934e+06	2.80412e+06	1.75894e+06	5.23175e+06	2.34566e+06	2.1586e+06	565191	2.72407e+06
C3893	C3893_1-(4-Aminophenyl)-7,8-dimethoxy-3,5-dihydro-2,3-benzodiazepin-4-one	HMDB0249842	POS	6.078	312.134	C17 H17 N3 O3	1-(4-Aminophenyl)-7,8-dimethoxy-3,5-dihydro-2,3-benzodiazepin-4-one	6.4249618105805e-05	0.206506088832994	NA	4	HMDB	NA	HMDB0249842	Organoheterocyclic compounds	NA	Benzodiazepines	Benzodiazepines	NA	NA	NA	708012	1.35757e+06	628301	1.6691e+06	1.34596e+06	645008	1.31934e+06	1.53532e+06	883560	452657	228196	1.41704e+06	641478	2.38055e+06	2.36638e+06	361557	964820	952051	1.26513e+06	517384	1.08197e+06
A1333	A1333_1-(4-Chlorophenyl)-3-[11-(4-methoxybenzoyl)-6-oxo-7,11-diazatricyclo[7.3.1.02,7]trideca-2,4-dien-5-yl]urea	8.689_491.15402	NEG	8.689	491.154	C26 H25 Cl N4 O4	1-(4-Chlorophenyl)-3-[11-(4-methoxybenzoyl)-6-oxo-7,11-diazatricyclo[7.3.1.02,7]trideca-2,4-dien-5-yl]urea	0.00486768927277126	9.89053265967335	49.7384742411583	3	mzCloud	NA	NA	NA	NA	NA	NA	NA	NA	NA	3.35849e+06	4.73336e+06	6.7439e+06	698736	1.34045e+06	116031	1.79702e+06	2.01357e+06	3.18939e+06	3.98066e+06	55801.6	1.8195e+06	1.68608e+06	1.00437e+06	1.10845e+06	416434	1.18515e+06	7.59074e+06	2.16147e+06	46753.2	2.25232e+06
A780	A780_1-(4-Chlorophenyl)-3-{(1S,4S)-4-[1-(2-cyanoethyl)-3,5-dimethyl-1H-pyrazol-4-yl]-2-cyclopenten-1-yl}urea	Reference9098	POS	11.03	406.142	C20 H22 Cl N5 O	1-(4-Chlorophenyl)-3-{(1S,4S)-4-[1-(2-cyanoethyl)-3,5-dimethyl-1H-pyrazol-4-yl]-2-cyclopenten-1-yl}urea	21.9834031834375	57375.2558695104	75.5464007222552	2	mzCloud	NA	NA	NA	NA	NA	NA	NA	NA	NA	9037.99	9329.09	10342.7	10926.9	6503.83	15546.3	1.91318e+06	9531.23	10657.8	8974.1	25071.3	19597.9	9648.26	12787.8	13723.1	18483.7	8341.75	12200	10717.5	22909.7	107876
C2769	C2769_1-(4-Methoxyphenyl)-2-phenylethane; 1-Methoxy-4-(2-phenylethyl)benzene; 4-Methoxydibenzyl;	C14666	POS	7.336	213.128	C15 H16 O	1-(4-Methoxyphenyl)-2-phenylethane; 1-Methoxy-4-(2-phenylethyl)benzene; 4-Methoxydibenzyl;	0.00033699867196901	1.58871624146496	NA	4	KEGG	C14666	NA	NA	NA	NA	NA	NA	NA	NA	2.26429e+06	1.59611e+06	614486	3.92106e+06	2.00898e+06	94923.3	1.90973e+06	893759	1.89618e+06	1.84918e+06	103375	936479	1.22758e+06	1.62236e+06	2.42994e+06	197042	787891	393242	458958	132509	1.2669e+06
C1250	C1250_1-(4-Methoxyphenyl)-3-(1,4-thiazinan-4-yl)pyrrolidine-2,5-dione	3.963_307.11190	POS	3.963	307.112	C15 H18 N2 O3 S	1-(4-Methoxyphenyl)-3-(1,4-thiazinan-4-yl)pyrrolidine-2,5-dione	0.0008146994447884	2.66151354567394	24.6772600081434	3	mzCloud	NA	NA	NA	NA	NA	NA	NA	NA	NA	79684.3	141085	109653	155223	101605	4.26316e+06	35103.6	70810.1	217617	46003.6	6.30576e+06	39503.2	92462.2	36370.5	139617	659615	45655.2	35462.8	253617	225484	652675
C1412	C1412_1-(4-Methoxyphenyl)-3-{(3S,5S)-1-methyl-5-[3-(3-pyridinyl)-1,2,4-oxadiazol-5-yl]-3-pyrrolidinyl}urea	5.022_395.18128	POS	5.022	395.181	C20 H22 N6 O3	1-(4-Methoxyphenyl)-3-{(3S,5S)-1-methyl-5-[3-(3-pyridinyl)-1,2,4-oxadiazol-5-yl]-3-pyrrolidinyl}urea	-0.00133139483699551	-3.37767157680927	39.7678618090447	3	mzCloud	NA	NA	NA	NA	NA	NA	NA	NA	NA	3.61316e+06	4.05584e+06	1.18865e+07	1.35162e+06	4.08362e+06	5.3483e+06	4.01129e+06	5.95468e+06	6.17127e+06	6.15515e+06	1.18771e+07	2.75139e+06	3.3896e+06	1.4332e+06	1.84429e+06	6.60176e+06	2.80921e+06	6.61682e+06	6.93845e+06	846127	4.88697e+06
A823	A823_1-(4-Methoxyphenyl)-3-{[(2R,4S,5S)-5-(4-thiomorpholinylmethyl)-1-azabicyclo[2.2.2]oct-2-yl]methyl}urea	0.736_403.21632	NEG	0.736	403.216	C21 H32 N4 O2 S	1-(4-Methoxyphenyl)-3-{[(2R,4S,5S)-5-(4-thiomorpholinylmethyl)-1-azabicyclo[2.2.2]oct-2-yl]methyl}urea	-0.00100252294140546	-2.48011365264018	30.9251220178042	3	mzCloud	NA	NA	NA	NA	NA	NA	NA	NA	NA	304669	540909	1.29182e+06	424356	646103	445438	542736	269479	749619	283610	490467	838025	522477	4.38524e+06	1.09758e+06	899998	535995	624225	290798	475268	782941
C874	C874_1-(4-Methoxyphenyl)piperazine	Reference5158	POS	5.224	193.134	C11 H16 N2 O	1-(4-Methoxyphenyl)piperazine	0.00014334814306948	0.746114252010404	88.5869076028113	2	mzCloud	NA	NA	NA	NA	NA	NA	NA	NA	NA	3.40041e+06	2.21252e+06	1.24685e+07	344476	2.37949e+06	2.54142e+09	501320	2.6671e+06	2.20322e+06	2.16179e+06	2.48566e+09	3.42023e+06	3.34618e+06	560431	2.55734e+06	1.76062e+08	6.01927e+06	2.55037e+07	2.81844e+06	1.40778e+08	2.70824e+08
C1371	C1371_1-(4-Methyl-1-piperazinyl)-2-[(3R,4S)-3-({5-[(phenylsulfanyl)methyl]-1,2-oxazol-3-yl}methyl)-4-piperidinyl]ethanone	4.607_429.23348	POS	4.607	429.233	C23 H32 N4 O2 S	1-(4-Methyl-1-piperazinyl)-2-[(3R,4S)-3-({5-[(phenylsulfanyl)methyl]-1,2-oxazol-3-yl}methyl)-4-piperidinyl]ethanone	0.00167704903600452	3.91628376394455	25.9785900326047	3	mzCloud	NA	NA	NA	NA	NA	NA	NA	NA	NA	9.39711e+06	4.48978e+06	3.7569e+06	5.37592e+06	3.63604e+06	1.20825e+06	3.40069e+06	4.26204e+06	3.83332e+06	3.99782e+06	873174	2.35645e+06	4.90382e+06	5.10052e+06	6.57555e+06	1.64657e+06	5.44958e+06	1.83441e+06	3.38114e+06	777862	3.81285e+06
C378	C378_1-(4-benzylpiperazino)-2-(pyridin-2-ylamino)propan-1-one	5.849_347.18518	POS	5.849	347.185	C19 H24 N4 O	1-(4-benzylpiperazino)-2-(pyridin-2-ylamino)propan-1-one	21.9828927140625	67807.6217908365	69.9453118389446	2	mzCloud	NA	NA	NA	NA	NA	NA	NA	NA	NA	950294	356836	563133	876737	431293	134870	532729	466324	547772	320594	61718.7	468985	414079	2.12054e+06	778452	278019	844018	281711	352845	169551	547525
A939	A939_1-(4-bromophenyl)-2-phenylethan-1-one	1.071_242.13887	POS	1.071	242.139	C14 H11 Br O	1-(4-bromophenyl)-2-phenylethan-1-one	-32.8677065349877	-119955.427742388	65.0183160519443	3	mzCloud	NA	NA	NA	NA	NA	NA	NA	NA	NA	1.42902e+06	1.2704e+06	1.04568e+06	2.37436e+06	2.3486e+06	503363	2.16132e+06	2.2931e+06	1.29406e+06	2.68026e+06	645871	1.46507e+06	1.42206e+06	695930	1.72599e+06	482090	1.82369e+06	1.26788e+06	740492	499405	1.40843e+06
C949	C949_1-(4-bromophenyl)-2-{[2-(4-bromophenyl)-2-oxoethyl]thio}ethan-1-one	0.579_426.90062	POS	0.579	426.901	C16 H12 Br2 O2 S	1-(4-bromophenyl)-2-{[2-(4-bromophenyl)-2-oxoethyl]thio}ethan-1-one	0.0008649945859247	2.03101636156036	1.12076139279096	3	mzCloud	NA	NA	NA	NA	NA	NA	NA	NA	NA	3.78269e+06	2.05383e+06	146173	2.73087e+06	684904	214696	249778	194170	1.70178e+06	220915	185882	255096	328303	2.56695e+06	4.14681e+06	204421	162200	153128	180055	566580	1.03646e+06
C217	C217_1-(4-chlorobenzyl)-4-(trifluoromethyl)-1,4,5,6-tetrahydropyridine-3-carboxamide	3.499_319.08112	POS	3.499	319.081	C14 H14 Cl F3 N2 O	1-(4-chlorobenzyl)-4-(trifluoromethyl)-1,4,5,6-tetrahydropyridine-3-carboxamide	-0.00083622734376831	-2.62902836551519	66.8440483537972	2	mzCloud	NA	NA	NA	NA	NA	NA	NA	NA	NA	140387	124716	129095	139146	135135	118509	129431	109418	115192	120180	128195	114639	115378	2.44489e+06	157269	101744	150374	95743.8	124217	136683	241517
C1653	C1653_1-(4-fluorophenyl)-4-[(2-phenyl-1H-imidazol-4-yl)methyl]piperazine	9.959_337.18216	POS	9.959	337.182	C20 H21 F N4	1-(4-fluorophenyl)-4-[(2-phenyl-1H-imidazol-4-yl)methyl]piperazine	-0.00014210085095101	-0.422699012286439	39.141784748176	3	mzCloud	NA	NA	NA	NA	NA	NA	NA	NA	NA	1.93008e+07	1.78891e+07	1.18423e+07	1.57187e+07	1.9435e+07	5.61578e+07	1.54847e+07	2.36775e+07	2.17227e+07	2.1892e+07	1.92797e+07	2.50318e+07	2.10395e+07	1.61136e+07	1.73009e+07	3.09325e+07	1.57595e+07	2.04003e+07	2.24788e+07	4.4635e+07	2.28046e+07
A1045	A1045_1-(4-methoxyphenyl)ethan-1-one 1-(1,4,5,6-tetrahydropyrimidin-2-yl)hydrazone	1.684_247.15415	POS	1.684	247.154	C13 H18 N4 O	1-(4-methoxyphenyl)ethan-1-one 1-(1,4,5,6-tetrahydropyrimidin-2-yl)hydrazone	-0.00112214612951789	-4.5588257909521	23.6271234218182	3	mzCloud	NA	NA	NA	NA	NA	NA	NA	NA	NA	2.69968e+06	2.77999e+06	4.03371e+06	5.02615e+06	8.01274e+06	2.42314e+06	5.60232e+06	7.59612e+06	2.55148e+06	5.04541e+06	250618	3.03053e+06	3.09316e+06	7.07581e+06	955413	1.01163e+06	4.23042e+06	6.03076e+06	7.69982e+06	1.4258e+06	4.02873e+06
A1015	A1015_1-(4-nitrophenyl)piperidine	1.445_207.11317	POS	1.445	207.113	C11 H14 N2 O2	1-(4-nitrophenyl)piperidine	18.0109244745229	87386.9065158209	51.2032692697318	3	mzCloud	NA	NA	NA	NA	NA	NA	NA	NA	NA	6.4916e+06	7.70803e+06	18519.8	9.77375e+06	1.3275e+07	1.93186e+06	8.1742e+06	5.87812e+06	3.37991e+06	7.97895e+06	466974	8.42589e+06	5.8845e+06	4.06528e+06	4.18025e+06	1.61073e+06	6.12657e+06	6.34535e+06	1.14777e+07	162395	5.66778e+06
C1326	C1326_1-(4-{5-[(2S)-1-(2-Methoxybenzyl)-2-pyrrolidinyl]-1,2,4-oxadiazol-3-yl}-2-pyridinyl)-4-piperidinecarboxamide	4.342_485.22889	POS	4.342	485.229	C25 H30 N6 O3	1-(4-{5-[(2S)-1-(2-Methoxybenzyl)-2-pyrrolidinyl]-1,2,4-oxadiazol-3-yl}-2-pyridinyl)-4-piperidinecarboxamide	21.9836718633001	47559.2114423301	15.7408401710139	3	mzCloud	NA	NA	NA	NA	NA	NA	NA	NA	NA	1.01193e+07	2.2621e+07	1.97274e+07	2.45194e+07	1.87473e+07	220589	8.75468e+06	1.60073e+07	3.14168e+07	5.7222e+06	387698	4.22273e+06	5.8356e+06	749467	1.45496e+07	678212	1.19012e+07	4.95901e+06	4.23629e+06	72571.1	1.02724e+07
A1330	A1330_1-(5-Nitrobenzo[b]furan-2-yl)ethan-1-one oxime	8.597_219.04134	NEG	8.597	219.041	C10 H8 N2 O4	1-(5-Nitrobenzo[b]furan-2-yl)ethan-1-one oxime	0.00021227848350235	0.964689936835797	39.2838777079352	3	mzCloud	NA	NA	NA	NA	NA	NA	NA	NA	NA	1.67082e+06	1.60482e+06	1.67826e+06	1.7629e+06	2.62117e+06	660380	1.71027e+06	1.56101e+06	1.04e+06	1.32772e+06	59024.5	1.26973e+06	1.19039e+06	775585	989544	211553	1.8469e+06	1.0182e+06	1.16181e+06	75694.2	1.21179e+06
A4156	A4156_1-(6-Aminopurin-9-yl)-5-methylpyrimidine-2,4-dione	HMDB0257910	NEG	12.199	258.073	C10 H9 N7 O2	1-(6-Aminopurin-9-yl)-5-methylpyrimidine-2,4-dione	-0.00119261734374732	-4.60324681422894	NA	4	HMDB	NA	HMDB0257910	Organoheterocyclic compounds	Purines and purine derivatives	Imidazopyrimidines	Purines and derivatives	NA	NA	NA	50061.2	120437	1.50315e+06	216500	510775	117378	359317	385456	114078	307150	119777	500122	241486	5.05211e+06	68165.4	97593.7	347682	298552	272307	116442	539927
A4310	A4310_1-(6-Hydroxy-2-azabicyclo[2.2.1]heptane-3-carbonyl)pyrrolidine-2-carbonitrile	HMDB0260235	POS	1.402	236.14	C12 H17 N3 O2	1-(6-Hydroxy-2-azabicyclo[2.2.1]heptane-3-carbonyl)pyrrolidine-2-carbonitrile	0.00021542417090358	0.916183678202621	NA	4	HMDB	NA	HMDB0260235	Organic acids and derivatives	Amino acids, peptides, and analogues	Carboxylic acids and derivatives	Amino acids, peptides, and analogues	NA	NA	NA	5.29306e+06	3.63412e+06	26076.7	4.51652e+06	1.96711e+06	1.98629e+06	3.11949e+06	3.05532e+06	4.61311e+06	2.47241e+06	2.72824e+06	2.08547e+06	2.27362e+06	64790.9	1.48873e+07	3.56681e+06	3.96904e+06	2.64906e+06	2.64998e+06	2.7594e+06	3.41586e+06
C1182	C1182_1-(6-methoxy-7-methyl-6H-[1,2,5]oxadiazolo[3,4-e]indol-8-yl)ethan-1-one	3.626_268.06721	POS	3.626	268.067	C12 H11 N3 O3	1-(6-methoxy-7-methyl-6H-[1,2,5]oxadiazolo[3,4-e]indol-8-yl)ethan-1-one	21.979894115012	89684.5537224022	38.6962942292691	3	mzCloud	NA	NA	NA	NA	NA	NA	NA	NA	NA	3.83181e+06	4.82444e+06	2.57842e+06	8.44585e+06	3.49673e+06	977567	3.3019e+06	2.5157e+06	4.37686e+06	2.32899e+06	171329	2.49628e+06	3.70523e+06	1.78334e+06	7.33962e+06	1.09186e+06	3.15233e+06	1.64145e+06	2.91958e+06	296842	3.0638e+06
C1149	C1149_1-(6-methyl-3-pyridyl)ethan-1-one O1-ethyloxime hydrochloride	3.384_197.12916	POS	3.384	197.129	C10 H14 N2 O	1-(6-methyl-3-pyridyl)ethan-1-one O1-ethyloxime hydrochloride	18.0113663691486	101124.610508898	67.4148356462937	3	mzCloud	NA	NA	NA	NA	NA	NA	NA	NA	NA	2.55471e+06	3.01998e+06	8.44308e+06	2.14322e+06	1.59062e+06	7.32757e+06	1.81437e+06	1.15049e+06	2.41652e+06	1.37469e+06	6.24535e+06	1.17894e+06	1.69061e+06	7.60421e+06	3.04582e+06	4.01263e+06	2.37513e+06	3.90985e+06	3.75164e+06	3.53359e+06	3.45915e+06
C2155	C2155_1-(8-[3]-ladderane-octanoyl)-2-(8-[1]-ladderane-octanyl)-sn-glycerol	10.742_651.53223	POS	10.742	651.532	C43 H70 O4	1-(8-[3]-ladderane-octanoyl)-2-(8-[1]-ladderane-octanyl)-sn-glycerol	-0.00245339453476845	-3.77139301921614	NA	4	NA	NA	NA	NA	NA	NA	NA	NA	NA	NA	142033	150879	8.09895e+06	1.8797e+06	1.83478e+06	253137	132361	133253	146752	170955	577524	155678	160203	128716	132555	218730	124653	2.21274e+07	443101	397983	1.87047e+06
C2539	C2539_1-(8-[5]-ladderane-octanoyl)-2-(8-[3]-ladderane-octanyl)-sn-glycerol	9.911_649.51630	POS	9.911	649.516	C43 H68 O4	1-(8-[5]-ladderane-octanoyl)-2-(8-[3]-ladderane-octanyl)-sn-glycerol	-0.00274068328121757	-4.22611192024965	NA	4	NA	NA	NA	NA	NA	NA	NA	NA	NA	NA	116115	130846	420059	105663	128692	296131	110069	118248	120159	138801	330401	136747	130164	101968	106845	231044	103812	2.49837e+06	122943	376160	291162
C4736	C4736_1-(Benzofuran-5-yl)-N-ethylpropan-2-amine	HMDB0259517	POS	6.238	204.139	C13 H17 N O	1-(Benzofuran-5-yl)-N-ethylpropan-2-amine	0.0002386186272929	1.17470307692005	NA	4	HMDB	NA	HMDB0259517	Organoheterocyclic compounds	NA	Benzofurans	Benzofurans	NA	NA	NA	36761.8	301820	1.10562e+06	88961.1	58516.3	919406	120810	63504.7	253114	408932	2.878e+06	149082	58374.9	36020.4	82289.5	314823	153073	625122	1.57359e+06	65405.5	464661
A706	A706_1-(Carboxymethyl)cyclohexanecarboxylic acid	Reference3231	NEG	9.387	185.082	C9 H14 O4	1-(Carboxymethyl)cyclohexanecarboxylic acid	0.0003697622698553	1.98701618540903	88.0063255654432	2	mzCloud	NA	NA	NA	NA	NA	NA	NA	NA	NA	730790	639919	2.27456e+06	1.423e+06	4.65907e+06	885676	1.00299e+06	1.89613e+06	945381	1.36604e+06	856797	868905	977043	1.22026e+06	581199	675328	553535	1.00847e+06	2.78e+06	792132	1.30686e+06
A1126	A1126_1-(Cyclopropylmethyl)-4-[4-(trifluoromethoxy)phenyl]tetrahydropyrazine-2,5-dione	12.923_327.09504	NEG	12.923	327.095	C15 H15 F3 N2 O3	1-(Cyclopropylmethyl)-4-[4-(trifluoromethoxy)phenyl]tetrahydropyrazine-2,5-dione	-0.00116113465105627	-3.53892821314756	36.0708150153072	3	mzCloud	NA	NA	NA	NA	NA	NA	NA	NA	NA	617159	639548	51885.6	519269	1.39498e+06	32363	1.06091e+06	456793	214594	1.32261e+06	43074.3	1.78093e+06	279030	172494	33051.3	38387.1	1.13874e+06	221449	258541	42127.7	515897
A4169	A4169_1-(Naphthalen-2-ylmethyl)-1,2,3,4-tetrahydroisoquinoline-6,7-diol	HMDB0258053	POS	1.324	306.15	C20 H19 N O2	1-(Naphthalen-2-ylmethyl)-1,2,3,4-tetrahydroisoquinoline-6,7-diol	0.00110797890624781	3.63103222679118	NA	4	HMDB	NA	HMDB0258053	Organoheterocyclic compounds	NA	Tetrahydroisoquinolines	Tetrahydroisoquinolines	NA	NA	NA	39101	38324.5	1.79845e+06	40504.1	31490.3	37490	32875.8	29689.2	51005.7	34213.8	84316.8	28370.7	41487.8	32168	65709.8	64725.5	32348.1	32324.8	33709.7	104964	132663
A3934	A3934_1-(cis-13-Docosenoyl)-rac-glycerol	HMDB0254855	NEG	0.818	411.348	C25 H48 O4	1-(cis-13-Docosenoyl)-rac-glycerol	0.0001349342506387	0.32722815441002	NA	4	HMDB	NA	HMDB0254855	Lipids and lipid-like molecules	Monoradylglycerols	Glycerolipids	Glycerolipids[GL]	NA	NA	NA	4.25358e+07	6.16062e+06	933447	6.22868e+06	6.37474e+06	6.20729e+06	1.00535e+07	6.09932e+07	1.25232e+07	6.57303e+07	7.35572e+07	1.10144e+07	1.26896e+08	6.25121e+07	8.97156e+07	1.61524e+08	7.10376e+06	6.08729e+07	9.66747e+06	7.79813e+07	4.49293e+07
C2527	C2527_1-(hexadecanoyl)-2-(8-[1]-ladderane-octanyl)-sn-glycerol	9.861_603.53508	POS	9.861	603.535	C39 H70 O4	1-(hexadecanoyl)-2-(8-[1]-ladderane-octanyl)-sn-glycerol	0.00039553237547806	0.656455405323123	NA	4	NA	NA	NA	NA	NA	NA	NA	NA	NA	NA	321878	336492	3.64759e+06	2.26361e+06	1.56232e+07	774901	295616	309424	322124	370843	864576	349915	360675	268252	292915	604585	293719	2.22857e+06	337972	984317	1.54256e+06
A265	A265_1-({(1S,4S,6S)-6-Isopropyl-3-methyl-4-[2-(4-methyl-1-piperazinyl)-2-oxoethyl]-2-cyclohexen-1-yl}methyl)-3-(3-methoxyphenyl)urea	2.867_491.27812	NEG	2.867	491.278	C26 H40 N4 O3	1-({(1S,4S,6S)-6-Isopropyl-3-methyl-4-[2-(4-methyl-1-piperazinyl)-2-oxoethyl]-2-cyclohexen-1-yl}methyl)-3-(3-methoxyphenyl)urea	35.9753516955111	78839.7108612193	61.0648047778863	2	mzCloud	NA	NA	NA	NA	NA	NA	NA	NA	NA	1.25727e+07	1.14145e+07	6.24386e+06	1.54125e+07	1.14503e+07	233921	7.90307e+06	4.9464e+06	2.43648e+07	1.04996e+07	1.08739e+07	7.25817e+06	2.65011e+07	1.29347e+06	7.88309e+07	8.70979e+06	4.8048e+06	2.90699e+06	4.86817e+06	1.08825e+07	1.30986e+07
C3463	C3463_1-Acetyl-2-(3-pyrrolidino-1-propynyl)piperidine	HMDB0244295	POS	4.187	235.18	C14 H22 N2 O	1-Acetyl-2-(3-pyrrolidino-1-propynyl)piperidine	-7.89089058912396e-05	-0.336968113443564	NA	4	HMDB	NA	HMDB0244295	Organoheterocyclic compounds	N-acylpiperidines	Piperidines	N-acylpiperidines	NA	NA	NA	1.03169e+06	647235	664128	557870	439532	1.96747e+06	1.10977e+06	721568	674610	530836	3.00448e+06	789295	739006	723024	628343	1.53081e+06	1.06922e+06	843989	718056	3.04552e+06	1.07182e+06
C1363	C1363_1-Acetyl-3-[(4-methoxyphenyl)methylene]tetrahydropyrazine-2,5-dione	4.555_275.10261	POS	4.555	275.103	C14 H14 N2 O4	1-Acetyl-3-[(4-methoxyphenyl)methylene]tetrahydropyrazine-2,5-dione	-2.56997224710176e-05	-0.0937619767411629	8.37215772074141	3	mzCloud	NA	NA	NA	NA	NA	NA	NA	NA	NA	3.79247e+06	4.8762e+06	5.63612e+06	4.80968e+06	3.63074e+06	3.08604e+06	4.76662e+06	4.39336e+06	3.51839e+06	4.47251e+06	3.0378e+06	4.10596e+06	3.42541e+06	4.79079e+06	5.32429e+06	2.06004e+06	7.4017e+06	3.12404e+06	4.79581e+06	1.2433e+06	4.11456e+06
C3368	C3368_1-Acetylproline	HMDB0242126	POS	3.553	158.081	C7 H11 N O3	1-Acetylproline	0.00023270278541076	1.48148607495309	27.2361350435672	4	Public	NA	HMDB0242126	Organic acids and derivatives	Amino acids, peptides, and analogues	Carboxylic acids and derivatives	Amino acids, peptides, and analogues	NA	NA	NA	1.6915e+06	4.96388e+06	5.56195e+06	1.6635e+06	1.27358e+06	6.23011e+06	1.3613e+06	2.68808e+06	5.33568e+06	1.48159e+06	2.23324e+07	1.63812e+06	2.13552e+06	3.9713e+06	1.54151e+06	4.14954e+06	1.17094e+06	4.21999e+06	1.98197e+06	3.36023e+06	3.93763e+06
A4111	A4111_1-Adamantanecarbonyl-RF-NH2	HMDB0257189	POS	3.152	483.309	C26 H38 N6 O3	1-Adamantanecarbonyl-RF-NH2	0.00088459341117186	1.83411242524427	NA	4	HMDB	NA	HMDB0257189	Organic acids and derivatives	Amino acids, peptides, and analogues	Carboxylic acids and derivatives	Amino acids, peptides, and analogues	NA	NA	NA	5.08437e+06	7.25125e+06	3.80561e+06	5.14458e+06	2.64411e+06	107736	3.34206e+06	2.9174e+06	2.83786e+07	4.3081e+06	4.89867e+06	2.69336e+06	1.23985e+07	1.32327e+06	6.24639e+07	5.30931e+06	3.37371e+06	2.05792e+06	3.27865e+06	3.5791e+06	8.21801e+06
C3427	C3427_1-Amino-2-naphthol	HMDB0243817	POS	6.102	160.076	C10 H9 N O	1-Amino-2-naphthol	0.00038083997415583	2.39418980104421	NA	4	HMDB	NA	HMDB0243817	Benzenoids	Naphthols and derivatives	Naphthalenes	Benzene and derivatives	NA	NA	NA	645300	479764	1.91855e+06	1.02894e+06	1.33534e+06	5.72859e+06	294373	414176	1.28906e+06	463472	2.73861e+06	1.00692e+06	499330	373494	2.01571e+06	1.06249e+06	222568	416052	922798	735558	1.17955e+06
C823	C823_1-Aminocyclohexanecarboxylic acid	Reference106	POS	0.954	144.102	C7 H13 N O2	1-Aminocyclohexanecarboxylic acid	0.00027163838348087	1.89831292870667	66.1544940981559	2	mzCloud	NA	NA	NA	NA	NA	NA	NA	NA	NA	1.40111e+07	1.45715e+07	1.6722e+07	2.10964e+07	3.30493e+07	1.20721e+07	2.05764e+07	1.73961e+07	1.76381e+07	1.37732e+07	1.18872e+07	1.31334e+07	1.54415e+07	1.38797e+07	2.049e+07	1.1181e+07	2.09073e+07	1.12472e+07	2.18043e+07	1.50435e+07	1.67961e+07
C3428	C3428_1-Benzoylpyrrolidine	HMDB0243833	POS	5.467	176.107	C11 H13 N O	1-Benzoylpyrrolidine	0.00023799146993042	1.3591768056458	NA	4	HMDB	NA	HMDB0243833	Benzenoids	Benzoic acids and derivatives	Benzene and substituted derivatives	Benzene and derivatives	NA	NA	NA	976181	1.0421e+06	965984	1.5207e+06	920262	1.14369e+06	1.52733e+06	1.2513e+06	1.50084e+06	1.99264e+06	1.06069e+06	1.31576e+06	965440	1.97702e+06	1.12994e+06	1.34224e+06	690098	1.03281e+06	614250	891176	1.19302e+06
A1135	A1135_1-Benzyl-3-[2-(2-furyl)vinyl]-4,5-dihydro-1H-pyrazole	13.332_253.13406	POS	13.332	253.134	C16 H16 N2 O	1-Benzyl-3-[2-(2-furyl)vinyl]-4,5-dihydro-1H-pyrazole	0.00052401070314545	2.07836619931649	39.3605421159039	3	mzCloud	NA	NA	NA	NA	NA	NA	NA	NA	NA	25127.4	23226.4	22602.5	23005.3	33482.3	35695.2	19638.9	25436.9	27662.9	32707.9	62960.7	23749.5	28530.7	71075.9	35675.7	45797	17629	6.60469e+06	20896.9	57904.8	361875
A3173	A3173_1-Benzylpiperazine	HMDB0243838	POS	2.856	177.139	C11 H16 N2	1-Benzylpiperazine	4.67650000075537e-05	0.265512076135975	NA	4	HMDB	NA	HMDB0243838	Benzenoids	Phenylmethylamines	Benzene and substituted derivatives	Amines and derivatives	NA	NA	NA	588650	478549	2.56833e+06	632230	483685	2.75084e+06	511870	2.23466e+06	1.11954e+06	658488	1.23612e+07	1.14335e+06	1.08295e+06	408565	1.3234e+06	1.12665e+07	2.5033e+06	5.60933e+06	473134	5.07921e+06	2.66389e+06
A3455	A3455_1-Butyl-3-(pyridine-4-carbonylamino)thiourea	HMDB0247351	NEG	0.713	251.096	C11 H16 N4 O S	1-Butyl-3-(pyridine-4-carbonylamino)thiourea	-0.00118159042963839	-4.6869076713579	NA	4	HMDB	NA	HMDB0247351	Organoheterocyclic compounds	Pyridinecarboxylic acids and derivatives	Pyridines and derivatives	Pyridine and derivatives	NA	NA	NA	709848	604205	1.12542e+06	2.0137e+06	1.48062e+06	500802	1.32385e+06	1.86927e+06	1.16844e+06	90738.4	1.06547e+06	383894	127533	3.19444e+06	844042	1.59046e+06	2.39164e+06	1.80605e+06	1.14161e+06	231315	1.18317e+06
A3108	A3108_1-Carboxyethylvaline	HMDB0240627	NEG	7.42	188.093	C8 H15 N O4	1-Carboxyethylvaline	0.00030201192450363	1.59710075228088	NA	4	HMDB	NA	HMDB0240627	Organic acids and derivatives	Amino acids, peptides, and analogues	Carboxylic acids and derivatives	Amino acids, peptides, and analogues	NA	NA	NA	2.12379e+06	1.72919e+06	3.81829e+06	2.12699e+06	3.30583e+06	861601	2.56602e+06	1.46319e+06	1.12466e+06	2.70262e+06	1.37479e+06	2.80091e+06	1.81228e+06	1.25618e+06	759644	378188	1.48861e+06	907004	1.39043e+06	2.19288e+06	1.80916e+06
A2520	A2520_1-Chloro-2-(chlorophenylmethyl)benzene;	C14611	NEG	9.307	235.009	C13 H10 Cl2	1-Chloro-2-(chlorophenylmethyl)benzene;	-2.3275742705664e-05	-0.0986193608674908	NA	4	KEGG	C14611	NA	NA	NA	NA	NA	NA	NA	NA	3.38264e+06	4.14368e+06	1.07039e+06	4.34102e+06	2.71623e+06	1.44001e+07	2.88589e+06	1.80356e+06	2.79958e+06	4.90634e+06	58466.1	2.6219e+06	2.69428e+06	894944	729032	57709.5	875454	1.28745e+06	3.7915e+06	46887.3	2.77535e+06
A3159	A3159_1-Chloro-diethylcarbamoyl-1-propen-2-yl dimethyl phosphate	HMDB0243647	NEG	8.859	298.06	C10 H19 Cl N O5 P	1-Chloro-diethylcarbamoyl-1-propen-2-yl dimethyl phosphate	-0.00123533531251496	-4.13060388637086	NA	4	HMDB	NA	HMDB0243647	Organic acids and derivatives	Phosphate esters	Organic phosphoric acids and derivatives	Organic acids	NA	NA	NA	10340.7	15917.2	10843.8	9818.8	10290.6	16250.8	12459	10416	12298.7	10197.7	74529.8	11556.9	10843.4	1.69587e+06	25095.9	21647.9	10263.6	9768.41	9757.67	32943.6	101055
C3429	C3429_1-Cyclohexene-1-carboxylic acid	HMDB0243852	POS	4.481	127.076	C7 H10 O2	1-Cyclohexene-1-carboxylic acid	0.00030882296105971	2.44965230123711	NA	4	HMDB	NA	HMDB0243852	Organic acids and derivatives	Carboxylic acids	Carboxylic acids and derivatives	Organic acids	NA	NA	NA	2.16543e+06	1.28836e+06	1.35392e+06	3.54554e+06	2.33574e+06	1.4079e+06	1.06779e+06	3.03873e+06	4.00162e+06	3.47039e+06	3.39243e+06	1.83836e+06	1.98708e+07	3.17817e+06	1.35611e+07	4.73952e+06	7.21111e+06	1.19389e+06	4.278e+06	1.37802e+07	4.83595e+06
A1175	A1175_1-Cyclohexylhexahydropyrimidine-2-thione	2.428_199.12712	POS	2.428	199.127	C10 H18 N2 S	1-Cyclohexylhexahydropyrimidine-2-thione	0.00077510167969308	3.91230224665616	26.0242410886608	3	mzCloud	NA	NA	NA	NA	NA	NA	NA	NA	NA	173833	359793	1.47864e+06	72841.9	123375	169345	523809	627568	678869	348606	3.45853e+06	470614	560480	544457	341165	2.2282e+06	493064	468027	517023	3.49029e+06	856427
C3804	C3804_1-Cyclopropyl-3-(3-(5-(morpholinomethyl)-1H-benzo[d]imidazol-2-yl)-1H-pyrazol-4-yl)urea	HMDB0248690	POS	4.165	382.197	C19 H23 N7 O2	1-Cyclopropyl-3-(3-(5-(morpholinomethyl)-1H-benzo[d]imidazol-2-yl)-1H-pyrazol-4-yl)urea	-0.00118456909069664	-3.10754474082945	NA	4	HMDB	NA	HMDB0248690	Organoheterocyclic compounds	NA	Benzimidazoles	Imidazole and derivatives	NA	NA	NA	2.18412e+06	1.34741e+06	689877	1.63561e+06	1.42972e+06	206480	1.6082e+06	1.15881e+06	472911	1.11102e+06	145458	1.84645e+06	1.04283e+06	2.08413e+06	1.88834e+06	384301	2.14142e+06	1.37434e+06	1.1612e+06	142814	1.20277e+06
C2785	C2785_1-Dehydro-9-fluoro-11-oxotestololactone;	C15387	POS	9.553	333.151	C19 H21 F O4	1-Dehydro-9-fluoro-11-oxotestololactone;	0.00150814267351507	4.54065103250648	NA	4	KEGG	C15387	NA	NA	NA	NA	NA	NA	NA	NA	1.79155e+07	9.80149e+06	2.1595e+06	4.75046e+06	1.81318e+07	6.27769e+07	9.98128e+06	1.23899e+07	1.03644e+07	6.02068e+06	4.25646e+07	2.02813e+07	4.83008e+06	8.55964e+06	1.80992e+07	4.29643e+07	9.91201e+06	8.83971e+06	1.80986e+07	5.50986e+07	1.9177e+07
C3430	C3430_1-Deoxy-1-morpholino-D-fructose	HMDB0243858	POS	1.082	250.129	C10 H19 N O6	1-Deoxy-1-morpholino-D-fructose	4.74626827156044e-05	0.19052041991593	NA	4	HMDB	NA	HMDB0243858	Organoheterocyclic compounds	Morpholines	Oxazinanes	Morpholines	NA	NA	NA	1.18028e+08	8.68625e+07	9.90814e+07	1.00092e+08	1.24307e+08	1.50514e+08	9.11878e+07	1.29601e+08	1.24034e+08	1.05261e+08	5.12996e+07	8.96471e+07	1.10688e+08	9.25985e+07	8.38151e+07	7.64948e+07	6.42461e+07	1.4624e+08	6.17059e+07	9.95942e+07	1.00265e+08
A2396	A2396_1-Deoxy-D-altro-heptulose 7-phosphate;	C04359	NEG	12.114	273.038	C7 H15 O9 P	1-Deoxy-D-altro-heptulose 7-phosphate;	5.65526717650755e-05	0.206362443217244	NA	4	KEGG	C04359	NA	NA	NA	NA	NA	NA	NA	NA	980393	876151	1.30849e+06	760047	3.99655e+07	5.53865e+06	1.04487e+07	2.36698e+06	709063	1.59094e+06	2.49247e+07	3.09942e+07	355116	447638	32531.9	1.80695e+06	898601	1.88222e+07	3.91261e+07	6.86858e+06	9.44108e+06
A1562	A1562_1-Dodecanesulfonic acid	Reference1722	NEG	0.708	499.31	C12 H26 O3 S	1-Dodecanesulfonic acid	-0.00117384965432166	-4.69239050817198	19.0846164492952	3	mzCloud	NA	NA	NA	NA	NA	NA	NA	NA	NA	3.56758e+06	7.84386e+06	1.38299e+07	4.57609e+06	8.04048e+06	6.6211e+06	5.01521e+06	7.22092e+06	3.19525e+07	3.2796e+06	7.22826e+06	5.84064e+06	1.63719e+07	6.20033e+06	1.93363e+07	1.43631e+07	7.9794e+06	5.90526e+06	1.83427e+06	2.86826e+07	1.02845e+07
A3176	A3176_1-Ethoxymethyl-5-fluorouracil	HMDB0243872	NEG	0.886	187.052	C7 H9 F N2 O3	1-Ethoxymethyl-5-fluorouracil	-0.00086893296872858	-4.62051611839605	NA	4	HMDB	NA	HMDB0243872	Organoheterocyclic compounds	Pyrimidines and pyrimidine derivatives	Diazines	Pyrimidines and pyrimidine derivatives	NA	NA	NA	272490	399876	119474	530300	308184	1.21284e+06	306172	179404	1.16559e+06	113417	2.24134e+06	848803	469173	237863	1.49809e+07	874802	236253	200586	496346	697508	1.29457e+06
A1589	A1589_1-Ethoxynaphthalene	Reference3205	POS	11.03	173.097	C12 H12 O	1-Ethoxynaphthalene	0.00055757992188887	3.24007066943006	25.635801289161	3	mzCloud	NA	NA	NA	NA	NA	NA	NA	NA	NA	330253	337653	447746	267870	435220	898470	6.61763e+06	561380	295772	484980	408838	720339	463261	385216	133962	254932	432313	679714	432506	342721	746539
A911	A911_1-Ethyl-6,7-dimethoxyisoquinolin-3-ol	0.978_234.11245	POS	0.978	234.112	C13 H15 N O3	1-Ethyl-6,7-dimethoxyisoquinolin-3-ol	-1.56341440060714e-05	-0.0670690506208679	20.031589803081	3	mzCloud	NA	NA	NA	NA	NA	NA	NA	NA	NA	2.62078e+06	1.39935e+06	423485	1.64149e+06	2.08497e+06	907314	403595	361825	4.38095e+06	993677	8.43722e+06	1.04957e+06	630812	275624	1.30716e+07	4.84403e+06	91220.3	482055	2.57556e+06	3.43765e+06	2.50564e+06
C3431	C3431_1-Ethylaziridine	HMDB0243874	POS	0.733	72.0809	C4 H9 N	1-Ethylaziridine	0.00013781735447082	1.93908215982548	NA	4	HMDB	NA	HMDB0243874	Organic nitrogen compounds	Amines	Organonitrogen compounds	Amines	NA	NA	NA	1.53466e+08	1.53055e+08	1.79441e+08	2.01744e+08	1.92696e+08	3.82219e+08	2.6621e+08	2.6086e+08	2.26423e+08	1.55086e+08	5.68487e+08	3.46034e+08	1.81555e+08	2.49042e+08	1.9727e+08	3.24557e+08	1.8016e+08	2.22588e+08	1.31629e+08	9.86507e+08	2.77951e+08
A3177	A3177_1-Heneicosanoyl-glycero-3-phosphoserine	HMDB0243883	NEG	4.456	566.347	C27 H54 N O9 P	1-Heneicosanoyl-glycero-3-phosphoserine	0.00101539239449266	1.78969933626478	NA	4	HMDB	NA	HMDB0243883	Lipids and lipid-like molecules	Glycerophosphoserines	Glycerophospholipids	Glycerophospholipids[GP]	NA	NA	NA	1.71232e+07	1.19156e+07	78490	2.78026e+06	1.3881e+07	1.88954e+07	8.97333e+06	9.34348e+06	3.62344e+07	6.83717e+06	3.92909e+08	2.05007e+07	2.71862e+06	7.64737e+06	3.49904e+07	5.28924e+08	2.05429e+07	2.15186e+07	1.65894e+07	1.53465e+09	1.35353e+08
C2758	C2758_1-Hexadecanoyl-2-(9Z-octadecenoyl)-sn-glycero-3-phosphonoethanolamine;	C13878	POS	12.239	702.542	C39 H76 N O7 P	1-Hexadecanoyl-2-(9Z-octadecenoyl)-sn-glycero-3-phosphonoethanolamine;	-0.0007802106906638	-1.11214642928493	NA	4	KEGG	C13878	NA	GP Glycerophospholipids	GP1701 Diacylglycerophosphonoethanolamines	GP17 Glycerophosphonoethanolamines	Glycerophospholipids[GP]	NA	NA	NA	80491	83738.2	72546.5	70092.4	79894.7	3.36934e+06	71339	76442.2	84462.5	94059.1	4.96838e+06	85312.7	91601.5	73344.7	77255.9	2.92918e+06	70693.3	382480	80543.2	3.3069e+06	807405
A3179	A3179_1-Hydroxy-2,2,5,5-tetramethyl-2,5-dihydro-1h-pyrrole-3-carboxamide	HMDB0243893	NEG	3.189	183.114	C9 H16 N2 O2	1-Hydroxy-2,2,5,5-tetramethyl-2,5-dihydro-1h-pyrrole-3-carboxamide	0.00028607292148308	1.55372089776806	NA	4	HMDB	NA	HMDB0243893	Organoheterocyclic compounds	Pyrroline carboxylic acids and derivatives	Pyrrolines	Pyrroline carboxylic acids and derivatives	NA	NA	NA	2.77593e+06	2.19057e+06	1.45611e+07	1.60189e+06	5.41764e+06	1.43166e+06	5.0191e+06	1.62717e+06	4.69219e+06	6.47347e+06	3.15346e+06	8.06427e+06	5.56766e+06	2.58467e+06	1.24338e+06	5.62291e+06	3.7161e+06	4.74823e+06	6.18966e+06	1.35966e+06	4.40204e+06
A3180	A3180_1-Hydroxy-2,2,5,5-tetramethylpyrrolidine-3-carboxamide	HMDB0243894	NEG	1.397	185.13	C9 H18 N2 O2	1-Hydroxy-2,2,5,5-tetramethylpyrrolidine-3-carboxamide	0.00019438912198666	1.04433455940373	NA	4	HMDB	NA	HMDB0243894	Organoheterocyclic compounds	Pyrrolidine carboxylic acids and derivatives	Pyrrolidines	Pyrrolidine carboxylic acids and derivatives	NA	NA	NA	118322	78282.8	74674.3	164752	94772.4	65991.3	96789.1	71008.7	83097.3	139273	87876.6	88069.4	46083.6	63339.9	125990	92166.8	67508.5	93740.8	164723	6.38869e+06	410257
C4543	C4543_1-Hydroxy-2,2,5,5-tetramethylpyrrolidine-3-carboxylic acid methyl ester	HMDB0257602	POS	2.798	202.144	C10 H19 N O3	1-Hydroxy-2,2,5,5-tetramethylpyrrolidine-3-carboxylic acid methyl ester	0.00013563964847662	0.674366178926621	NA	4	HMDB	NA	HMDB0257602	Organoheterocyclic compounds	Pyrrolidine carboxylic acids and derivatives	Pyrrolidines	Pyrrolidine carboxylic acids and derivatives	NA	NA	NA	3.2561e+06	3.91938e+06	3.27521e+06	4.17905e+06	6.82426e+06	4.21165e+06	2.41724e+06	1.36735e+06	2.79373e+06	2.67534e+06	2.76875e+06	1.59541e+06	1.83428e+06	9.48084e+06	4.78651e+06	1.86828e+06	3.21657e+06	1.2085e+06	2.66635e+06	4.86385e+06	3.46043e+06
A1583	A1583_1-Hydroxybenzotriazol	Reference3029	POS	9.448	136.05	C6 H5 N3 O	1-Hydroxybenzotriazol	-0.0003827403515686	-2.83420547318497	59.9473988916068	3	mzCloud	NA	NA	NA	NA	NA	NA	NA	NA	NA	285849	373202	337336	218866	194584	752301	416869	369064	318569	390578	478496	470350	412085	2.02512e+07	132018	294106	382481	524348	378937	328458	1.36549e+06
C3282	C3282_1-Hydroxyibuprofen	HMDB0060565	POS	5.202	223.133	C13 H18 O3	1-Hydroxyibuprofen	0.00023144699218846	1.04196453756787	NA	4	HMDB	NA	HMDB0060565	Phenylpropanoids and polyketides	NA	Phenylpropanoic acids	Phenylpropanoic acids	NA	NA	NA	3.23118e+06	2.07821e+06	1.52303e+06	3.65316e+06	3.78571e+06	1.78304e+06	2.52579e+06	2.27373e+06	2.13944e+06	1.8356e+06	471965	2.09715e+06	2.03025e+06	3.51986e+06	3.25774e+06	658836	2.65046e+06	1.31221e+06	2.5381e+06	1.61834e+06	2.24919e+06
A3982	A3982_1-Hydroxypyrrole-2,5-diol	HMDB0255335	NEG	11.558	114.02	C4 H5 N O3	1-Hydroxypyrrole-2,5-diol	0.00022530946121435	1.9587537965978	NA	4	HMDB	NA	HMDB0255335	Organoheterocyclic compounds	Substituted pyrroles	Pyrroles	Substituted pyrroles	NA	NA	NA	1.65167e+06	2.25238e+06	3.26745e+06	2.47813e+06	5.01239e+06	3.11202e+06	2.77739e+06	3.18924e+06	1.41324e+06	2.95673e+06	1.71214e+06	1.55707e+06	1.97014e+06	1.71721e+06	917455	1.39378e+06	831460	2.85652e+06	3.45916e+06	620841	2.25732e+06
C3435	C3435_1-Hydroxyvitamin D5	HMDB0243905	POS	10.594	429.373	C29 H48 O2	1-Hydroxyvitamin D5	0.00011469776455896	0.267756817788971	NA	4	HMDB	NA	HMDB0243905	Lipids and lipid-like molecules	Vitamin D and derivatives	Steroids and steroid derivatives	Vitamins and derivatives	NA	NA	NA	611986	498606	634418	410939	452900	3.02558e+07	553643	1.10754e+06	586404	780619	9.26234e+07	2.07124e+06	394634	300938	377562	3.25535e+07	1.28262e+06	1.95213e+06	374278	1.10454e+08	1.39138e+07
C4116	C4116_1-Isopropyl-N-((6-methyl-2-oxo-4-propyl-1,2-dihydropyridin-3-yl)methyl)-6-(2-(4-methylpiperazin-1-yl)pyridin-4-yl)-1H-indazole-4-carboxamide	HMDB0252956	POS	9.289	542.323	C31 H39 N7 O2	1-Isopropyl-N-((6-methyl-2-oxo-4-propyl-1,2-dihydropyridin-3-yl)methyl)-6-(2-(4-methylpiperazin-1-yl)pyridin-4-yl)-1H-indazole-4-carboxamide	-0.00101043143126844	-1.86661848963697	NA	4	HMDB	NA	HMDB0252956	Organoheterocyclic compounds	Piperazines	Diazinanes	Piperazines	NA	NA	NA	503110	428253	103439	93423.5	1.90298e+06	1.79036e+07	1.99199e+06	957533	432335	732930	4.60233e+07	6.06207e+06	110759	1.4809e+06	360272	4.06561e+07	1.18671e+06	2.16108e+06	1.90449e+06	2.57558e+08	1.91277e+07
C887	C887_1-Linoleoyl glycerol	Reference6618	POS	9.546	377.266	C21 H38 O4	1-Linoleoyl glycerol	0.00012188066483531	0.344026458260921	88.987439911712	2	mzCloud	NA	NA	NA	NA	NA	NA	NA	NA	NA	1.50346e+08	1.45225e+08	1.10678e+08	1.74108e+08	1.42146e+08	2.7811e+09	1.66672e+08	6.81394e+08	8.62855e+07	3.39357e+08	3.78128e+08	3.4034e+08	2.79775e+08	3.45272e+08	1.31461e+08	4.12463e+08	3.37782e+08	2.92701e+08	2.99211e+08	3.27812e+08	3.96113e+08
A1584	A1584_1-Methoxymethyl-1H-benzotriazole	Reference3030	POS	0.968	164.082	C8 H9 N3 O	1-Methoxymethyl-1H-benzotriazole	0.00028150201453058	1.72621659259766	53.016625287221	3	mzCloud	NA	NA	NA	NA	NA	NA	NA	NA	NA	2.7116e+06	5.76342e+06	8.10085e+06	2.91321e+06	3.52302e+06	2.50485e+06	2.16637e+06	4.42409e+06	6.91762e+06	4.62123e+06	9.66779e+06	3.80129e+06	8.23016e+06	5.43561e+06	5.79605e+06	6.40965e+06	2.6635e+06	6.08337e+06	8.05958e+06	3.69257e+06	5.17429e+06
A3182	A3182_1-Methyl-1,2-dihydropyridine-3-carboxamide	HMDB0243919	POS	3.788	139.087	C7 H10 N2 O	1-Methyl-1,2-dihydropyridine-3-carboxamide	0.0003855676562523	2.79236366516063	NA	4	HMDB	NA	HMDB0243919	Organoheterocyclic compounds	Pyridinecarboxylic acids and derivatives	Pyridines and derivatives	Pyridine and derivatives	NA	NA	NA	2.68263e+06	2.51935e+06	2.01982e+06	2.50952e+06	3.10035e+06	2.24519e+06	2.71168e+06	2.4636e+06	2.62908e+06	2.08244e+06	3.21343e+06	1.94243e+06	3.51632e+06	4.4202e+06	4.43742e+06	4.88718e+06	2.32188e+06	3.11066e+06	1.63176e+06	4.41026e+06	2.94276e+06
C4578	C4578_1-Methyl-1H-indole-3,5,6-triol	HMDB0257859	POS	5.29	180.066	C9 H9 N O3	1-Methyl-1H-indole-3,5,6-triol	0.00025103708318852	1.40198562704752	NA	4	HMDB	NA	HMDB0257859	Organoheterocyclic compounds	N-alkylindoles	Indoles and derivatives	Indole and derivatives	NA	NA	NA	414389	408734	459052	591249	2.59444e+06	725628	594228	826404	720957	543510	8.78131e+06	532377	830933	521491	360219	561551	313433	891118	1.31948e+06	1.72059e+06	1.18555e+06
A3183	A3183_1-Methyl-3,4-dihydroisoquinoline	HMDB0243928	POS	3.594	146.097	C10 H11 N	1-Methyl-3,4-dihydroisoquinoline	0.00017627489987148	1.21494199039348	NA	4	HMDB	NA	HMDB0243928	Organoheterocyclic compounds	NA	Dihydroisoquinolines	Dihydroisoquinolines	NA	NA	NA	40419.8	110770	43127.6	557759	21613.7	62205.3	129137	593976	237008	64862.6	305817	32216.6	5.35011e+06	536376	277878	1.16118e+06	2.08412e+06	101678	25114.5	349897	604264
C842	C842_1-Methyl-3,6-(1H,2H)-pyridazinedione	Reference2558	NEG	1.752	125.036	C5 H6 N2 O2	1-Methyl-3,6-(1H,2H)-pyridazinedione	2.04056362491656e-05	0.161894337693743	86.3237843115104	2	mzCloud	NA	NA	NA	NA	NA	NA	NA	NA	NA	1.6057e+08	1.17411e+08	1.46103e+08	9.3324e+07	9.8082e+07	3.94607e+07	1.07156e+08	1.04185e+08	1.19619e+08	2.01904e+08	7.66877e+07	8.75276e+07	2.18544e+08	8.80031e+07	9.87777e+07	1.30544e+08	9.57802e+07	1.56215e+08	1.41664e+08	1.17274e+08	1.19942e+08
A3491	A3491_1-Methyl-3-{2-[(1-methyl-1H-benzimidazol-2-yl)thio]ethyl}-1,3-dihydro-2H-benzimidazole-2-thione	HMDB0247841	NEG	0.616	353.091	C18 H18 N4 S2	1-Methyl-3-{2-[(1-methyl-1H-benzimidazol-2-yl)thio]ethyl}-1,3-dihydro-2H-benzimidazole-2-thione	0.00148214692558213	4.18570538680113	NA	4	HMDB	NA	HMDB0247841	Organoheterocyclic compounds	NA	Benzimidazoles	Imidazole and derivatives	NA	NA	NA	735497	3.38042e+06	590706	1.02845e+06	398511	271765	455305	622719	1.35861e+06	143529	93771	1.25673e+06	396638	4.87843e+06	7.9661e+06	670299	4.6255e+06	1.29267e+06	1.64937e+06	311992	1.60635e+06
A3478	A3478_1-Methyl-5-nitro-1H-imidazole-2-methanol	HMDB0247667	NEG	8.409	156.042	C5 H7 N3 O3	1-Methyl-5-nitro-1H-imidazole-2-methanol	0.00037000619349214	2.35599592274723	NA	4	HMDB	NA	HMDB0247667	Organoheterocyclic compounds	Imidazoles	Azoles	Imidazoles	NA	NA	NA	2.06578e+06	911530	4.59744e+06	1.50809e+06	3.85786e+06	1.01747e+06	2.20463e+06	2.08421e+06	1.02611e+06	1.64508e+06	277692	1.83866e+06	2.36603e+06	6.27043e+06	460652	230427	2.31019e+06	3.24355e+06	1.9629e+06	291038	2.00849e+06
A590	A590_1-Methyladenine	HMDB0011599	POS	3.338	150.078	C6 H7 N5	1-Methyladenine	0.00035068192184439	2.35246246892951	64.1991190156568	2	mzCloud	C02216	HMDB0011599	Organoheterocyclic compounds	Purines and purine derivatives	Imidazopyrimidines	Purines and derivatives	NA	NA	NA	1.09735e+06	2.67449e+06	520709	2.1798e+06	980655	1.01913e+06	396261	4.94799e+06	1.36455e+06	1.97508e+06	882843	2.34702e+06	483034	388349	3.00591e+06	568071	876811	268397	198954	895260	1.35353e+06
A3184	A3184_1-Methylcyclohexane-1,2-dicarboxylic acid	HMDB0243937	NEG	2.406	185.082	C9 H14 O4	1-Methylcyclohexane-1,2-dicarboxylic acid	0.00028412512034492	1.52682212013569	NA	4	HMDB	NA	HMDB0243937	Organic acids and derivatives	Dicarboxylic acids and derivatives	Carboxylic acids and derivatives	Organic acids	NA	NA	NA	3.56486e+06	2.29338e+06	4.65561e+06	4.13834e+06	7.27841e+06	4.14796e+06	2.82578e+06	6.80134e+06	2.8008e+06	3.50965e+06	3.42522e+06	2.70968e+06	4.11823e+06	2.0675e+06	3.3846e+06	3.40205e+06	2.46682e+06	3.68439e+06	4.17005e+06	2.56089e+06	3.70028e+06
A560	A560_1-Methylguanine	HMDB0003282	POS	4.127	166.073	C6 H7 N5 O	1-Methylguanine	0.00029571840292419	1.79152634279226	93.3042769328857	2	mzCloud	NA	HMDB0003282	Organoheterocyclic compounds	Purines and purine derivatives	Imidazopyrimidines	Purines and derivatives	NA	NA	NA	4.94617e+07	2.4864e+07	3.42831e+07	3.11038e+07	3.45334e+07	7.03266e+07	2.80435e+07	4.66542e+07	4.73436e+07	5.57178e+07	8.23799e+07	2.63981e+07	7.28093e+07	7.20218e+07	3.11207e+07	6.95828e+07	3.4074e+07	5.47428e+07	2.66264e+07	8.79961e+07	4.90042e+07
C2969	C2969_1-Methylhistidine	HMDB0000001	NEG	0.719	168.078	C7 H11 N3 O2	1-Methylhistidine	-0.00028652946286911	-1.69458703287113	NA	4	HMDB	NA	HMDB0000001	Organic acids and derivatives	Amino acids, peptides, and analogues	Carboxylic acids and derivatives	Amino acids, peptides, and analogues	NA	NA	NA	1.27674e+06	1.6874e+06	1.01715e+06	1.92223e+06	1.54399e+06	2.99015e+06	1.66372e+06	2.31017e+06	2.52338e+06	1.07348e+06	4.89452e+06	2.15166e+06	1.26752e+06	545908	915005	1.7992e+06	1.33055e+06	2.89041e+06	2.23184e+06	1.92636e+06	1.89807e+06
A3185	A3185_1-Methylindole	HMDB0243941	NEG	2.235	130.066	C9 H9 N	1-Methylindole	0.00023870050790719	1.82111951871747	NA	4	HMDB	NA	HMDB0243941	Organoheterocyclic compounds	N-alkylindoles	Indoles and derivatives	Indole and derivatives	NA	NA	NA	587974	1.54278e+06	6.73182e+06	5.46555e+06	1.253e+07	4.11501e+06	1.11478e+06	883901	6.95806e+06	1.24852e+06	9.62604e+06	100451	1.9376e+06	168654	9.09542e+06	1.37245e+06	98382.9	1.1036e+06	6.34323e+06	576316	3.58003e+06
A3186	A3186_1-Methylpyrrolidine	HMDB0243946	POS	4.119	86.0965	C5 H11 N	1-Methylpyrrolidine	0.00012099586901115	1.42198940715575	NA	4	HMDB	NA	HMDB0243946	Organoheterocyclic compounds	N-alkylpyrrolidines	Pyrrolidines	N-alkylpyrrolidines	NA	NA	NA	5.0817e+07	5.87747e+07	1.03799e+08	9.4791e+07	8.36464e+07	1.33384e+07	4.94044e+07	4.09355e+08	1.01154e+08	4.64755e+07	4.30625e+07	4.53544e+07	8.23364e+07	9.30402e+07	1.07614e+08	4.42482e+07	6.52575e+07	5.88262e+07	4.08967e+07	2.53927e+08	9.23059e+07
A1445	A1445_1-Methyluric acid	HMDB0003099	NEG	8.502	181.037	C6 H6 N4 O3	1-Methyluric acid	0.00028017483248277	1.53905016316964	45.8890241598074	3	mzCloud	C16359	HMDB0003099	Organoheterocyclic compounds	Purines and purine derivatives	Imidazopyrimidines	Purines and derivatives	Biosynthesis of other secondary metabolites	Caffeine metabolism	map00232 Caffeine metabolism;	1.0601e+06	2.76558e+06	2.58962e+06	6.26224e+06	2.87103e+06	1.42634e+07	3.50778e+06	693438	3.29909e+06	2.30403e+06	1.28844e+06	2.02338e+06	1.15054e+06	4.85259e+06	1.77907e+06	412881	385903	983811	4.37555e+06	173067	2.85208e+06
C115	C115_1-Methylxanthine	HMDB0010738	NEG	2.549	165.042	C6 H6 N4 O2	1-Methylxanthine	-0.00013886504439142	-0.836289175797174	91.6263815627065	1	Decode	C16358	HMDB0010738	Organoheterocyclic compounds	Purines and purine derivatives	Imidazopyrimidines	Purines and derivatives	Biosynthesis of other secondary metabolites	Caffeine metabolism	map00232 Caffeine metabolism; map01100 Metabolic pathways;	3.02115e+06	3.99615e+06	6.0943e+06	1.09546e+06	3.08401e+06	4.76386e+07	6.18889e+06	5.0422e+06	4.04258e+06	6.44997e+06	4.13415e+07	9.68535e+06	6.63209e+06	1.5893e+07	234091	1.69415e+07	3.89548e+06	6.72849e+06	5.33001e+06	4.33303e+07	1.18333e+07
A3191	A3191_1-Naphthalenesulfonic acid	HMDB0243955	NEG	0.716	207.012	C10 H8 O3 S	1-Naphthalenesulfonic acid	0.0002743275159105	1.31875919492119	NA	4	HMDB	NA	HMDB0243955	Benzenoids	Naphthalene sulfonic acids and derivatives	Naphthalenes	Benzene and derivatives	NA	NA	NA	1.5377e+06	1.31286e+06	3.2334e+06	5.98098e+06	1.32237e+06	5.88746e+06	965726	792189	6.47822e+06	1.56242e+06	1.60684e+07	4.40682e+06	3.80765e+06	1.68387e+06	2.7976e+06	1.29548e+07	2.17288e+06	503456	4.87567e+06	2.17629e+06	4.02603e+06
A3192	A3192_1-Naphthylamine	HMDB0243964	NEG	2.372	142.066	C10 H9 N	1-Naphthylamine	0.00016835121095937	1.17667640631106	NA	4	HMDB	NA	HMDB0243964	Benzenoids	NA	Naphthalenes	Benzene and derivatives	NA	NA	NA	1.41217e+07	8.08248e+06	5.66261e+06	5.21201e+06	6.76806e+06	1.10559e+07	2.91035e+06	4.15707e+06	3.0309e+06	4.66833e+06	1.7817e+07	3.58051e+06	5.63702e+06	4.31427e+06	1.45033e+07	1.5058e+07	4.88353e+06	4.292e+06	4.08949e+06	2.11323e+07	8.04884e+06
A1591	A1591_1-Nitro-2-phenoxybenzene	Reference3289	NEG	2.388	214.051	C12 H9 N O3	1-Nitro-2-phenoxybenzene	0.00034886761721963	1.6222006291853	58.2230171370749	3	mzCloud	NA	NA	NA	NA	NA	NA	NA	NA	NA	820802	2.44552e+06	340775	2.37229e+06	1.92418e+06	227314	7.27592e+06	4.59987e+06	272362	3.07866e+06	346721	4.90032e+06	289247	534852	696654	322198	3.71891e+06	3.2135e+06	4.34354e+06	455866	2.10897e+06
A3193	A3193_1-Nonadecanoyl-glycero-3-phosphoserine	HMDB0243972	NEG	4.511	538.315	C25 H50 N O9 P	1-Nonadecanoyl-glycero-3-phosphoserine	-2.02238619522177e-05	-0.0374986557430361	NA	4	HMDB	NA	HMDB0243972	Lipids and lipid-like molecules	Glycerophosphoserines	Glycerophospholipids	Glycerophospholipids[GP]	NA	NA	NA	718437	379734	108556	97889.4	1.68143e+06	2.8702e+06	883537	782662	1.21062e+06	418823	4.12379e+06	1.75947e+06	96483.6	1.09209e+06	1.0588e+06	5.1432e+06	660940	1.13944e+06	865133	1.67313e+08	9.62024e+06
C2133	C2133_1-O-(2R-hydroxy-4Z-eicosenyl)-sn-glycerol	10.29_409.32898	POS	10.29	409.329	C23 H46 O4	1-O-(2R-hydroxy-4Z-eicosenyl)-sn-glycerol	0.00011195766967375	0.289790813159207	NA	4	NA	NA	NA	NA	NA	NA	NA	NA	NA	NA	124201	185655	86627	62326.8	47897.9	4.04292e+06	101976	160592	175615	429638	4.27627e+06	294214	220813	134256	178835	2.57327e+06	51062.6	565371	365121	1.63167e+07	1.51967e+06
C2439	C2439_1-O-(2R-hydroxy-hexadecyl)-sn-glycerol	9.375_355.28180	POS	9.375	355.282	C19 H40 O4	1-O-(2R-hydroxy-hexadecyl)-sn-glycerol	-6.16833891626811e-05	-0.185629707369802	NA	4	NA	NA	NA	NA	NA	NA	NA	NA	NA	NA	1.42407e+06	1.51745e+06	1.73698e+06	2.00218e+06	1.25193e+06	694590	934306	856582	1.80654e+06	1.82045e+06	2.61276e+06	1.23228e+06	2.10466e+06	6.57284e+06	979886	1.49789e+06	1.37305e+06	1.34422e+06	1.37713e+06	1.94582e+06	1.75428e+06
A1972	A1972_1-O-(alpha-D-galactopyranosyl)-N-tetracosanyl-2-aminononane-1,3,4-triol	0.85_704.56613	POS	0.85	704.566	C39 H77 N O9	1-O-(alpha-D-galactopyranosyl)-N-tetracosanyl-2-aminononane-1,3,4-triol	-0.00097580605302027	-1.386955320149	NA	4	NA	NA	NA	NA	NA	NA	NA	NA	NA	NA	4.82903e+06	9.31577e+06	3.23659e+06	8.70381e+06	2.32095e+06	2.30552e+06	5.21557e+06	3.1542e+06	1.04555e+07	5.44331e+06	3.53081e+06	3.80841e+06	8.52408e+06	4.32939e+06	2.1014e+07	4.05288e+06	2.60425e+06	2.90821e+06	6.0061e+06	4.46362e+06	5.8111e+06
A3178	A3178_1-O-Hexadecyl-sn-glycero-3-phosphocholine	HMDB0243890	POS	4.584	482.36	C24 H52 N O6 P	1-O-Hexadecyl-sn-glycero-3-phosphocholine	-6.57636268215356e-05	-0.136622387578243	NA	4	HMDB	NA	HMDB0243890	Lipids and lipid-like molecules	Glycerophosphocholines	Glycerophospholipids	Glycerophospholipids[GP]	NA	NA	NA	2.27961e+07	2.55958e+07	7.04581e+06	6.63675e+06	3.84449e+07	4.07129e+07	3.05566e+07	2.76571e+07	6.60985e+07	8.28778e+06	5.04649e+08	3.97784e+07	1.40659e+07	1.33624e+07	8.0541e+07	1.11739e+09	3.33325e+07	2.35392e+07	3.39124e+07	1.54143e+09	1.83792e+08
C2757	C2757_1-O-Hexadecyl-sn-glycerol; 1-O-Hexadecylglycerol; Chimyl alcohol; Glycerol hexadecyl ether;	C13859	POS	9.936	339.287	C19 H40 O3	1-O-Hexadecyl-sn-glycerol; 1-O-Hexadecylglycerol; Chimyl alcohol; Glycerol hexadecyl ether;	-0.00017829828135518	-0.563703928256531	NA	4	KEGG	C13859	NA	GL Glycerolipids	GL0102 Monoalkylglycerols	GL01 Monoradylglycerols	Glycerolipids[GL]	NA	NA	NA	1.19975e+08	1.03339e+08	2.54549e+07	3.88785e+07	1.46548e+08	5.20694e+08	5.94299e+07	8.25236e+07	8.46097e+07	1.18548e+08	8.70946e+08	1.32474e+08	8.59008e+07	8.04204e+07	6.77385e+07	3.91666e+08	5.54979e+07	1.21062e+08	1.38266e+08	2.79498e+08	1.76174e+08
A874	A874_1-O-[(3beta,5xi,9xi,18xi)-3-(beta-D-Glucopyranuronosyloxy)-28-oxoolean-12-en-28-yl]-beta-D-glucopyranose	0.853_812.47845	POS	0.853	812.478	C42 H66 O14	1-O-[(3beta,5xi,9xi,18xi)-3-(beta-D-Glucopyranuronosyloxy)-28-oxoolean-12-en-28-yl]-beta-D-glucopyranose	17.0259202961091	21431.2064417001	19.7451001421744	3	mzCloud	NA	NA	NA	NA	NA	NA	NA	NA	NA	2.172e+06	2.63318e+06	169700	422383	250991	55493.4	249824	233769	369530	276387	130993	877839	831585	3.28302e+06	7.01768e+06	363415	1.57618e+06	344411	784082	199442	1.11209e+06
A2169	A2169_1-O-alpha-D-Glucopyranosyl-D-mannitol	11.884_343.12381	NEG	11.884	343.124	C12 H24 O11	1-O-alpha-D-Glucopyranosyl-D-mannitol	-0.00077431224349311	-2.25004520221712	NA	4	NA	NA	NA	NA	NA	NA	NA	NA	NA	NA	1.86386e+07	2.60617e+07	6.00739e+06	2.28573e+07	1.50018e+07	6.67885e+07	8.81304e+06	1.17225e+07	2.23986e+07	2.20857e+07	3.18517e+07	1.88699e+07	2.3104e+07	8.78241e+06	7.62874e+06	1.79137e+07	7.63808e+06	1.49362e+07	1.76748e+07	1.78471e+07	1.93311e+07
A1696	A1696_1-O-{3-[(6-Deoxyhexopyranosyl)oxy]-27-hydroxy-27,28-dioxoolean-12-en-28-yl}hexopyranose	Reference8145	POS	1.048	812.479	C42 H66 O14	1-O-{3-[(6-Deoxyhexopyranosyl)oxy]-27-hydroxy-27,28-dioxoolean-12-en-28-yl}hexopyranose	17.0263488259375	21431.7458493243	17.1394034208048	3	mzCloud	NA	NA	NA	NA	NA	NA	NA	NA	NA	3.42419e+06	3.52774e+06	265099	634453	445988	38264.5	460766	413049	370906	554061	77581.2	1.20763e+06	657444	2.07023e+06	7.53659e+06	572230	2.34121e+06	651241	1.32135e+06	149810	1.33599e+06
C2955	C2955_1-Octadecanoyl-2-(5Z,8Z,11Z,14Z-eicosatetraenoyl)-sn-glycero-3-phosphoethanolamine;	C21480	POS	11.965	768.553	C43 H78 N O8 P	1-Octadecanoyl-2-(5Z,8Z,11Z,14Z-eicosatetraenoyl)-sn-glycero-3-phosphoethanolamine;	-0.00119341382571747	-1.5548423691633	NA	4	KEGG	C21480	NA	GP Glycerophospholipids	GP0201 Diacylglycerophosphoethanolamines	GP02 Glycerophosphoethanolamines	Glycerophospholipids[GP]	NA	NA	map04216 Ferroptosis;	83548.4	83941.3	75531.4	76119.1	86835.8	1.67086e+07	73821	80925.7	86672.1	101649	1.41459e+07	89530.7	93516.4	72356.9	79005.4	7.03205e+06	76575.4	90255.2	82984.5	6.95641e+06	2.30881e+06
C116	C116_1-Oleoyl-rac-glycerol	HMDB0011567	POS	9.754	379.282	C21 H40 O4	1-Oleoyl-rac-glycerol	-3.39921725753811e-05	-0.0954052003584446	96.6143625269142	1	BMDB	NA	HMDB0011567	Lipids and lipid-like molecules	Monoradylglycerols	Glycerolipids	Glycerolipids[GL]	NA	NA	NA	1.93136e+08	1.65318e+08	5.00895e+07	1.04256e+08	2.93067e+08	3.5255e+09	1.90984e+08	8.10769e+08	1.0256e+08	2.51235e+08	1.00881e+09	4.9154e+08	2.43903e+08	3.88075e+08	1.36204e+08	8.82872e+08	3.41326e+08	4.58635e+08	3.50443e+08	1.0795e+09	5.53411e+08
C4318	C4318_1-Oxononan-4-yl (2R)-2-acetamido-3-sulfanylpropanoate	HMDB0255339	POS	5.558	304.158	C14 H25 N O4 S	1-Oxononan-4-yl (2R)-2-acetamido-3-sulfanylpropanoate	-5.89803549360113e-05	-0.194558045521337	NA	4	HMDB	NA	HMDB0255339	Organic acids and derivatives	Amino acids, peptides, and analogues	Carboxylic acids and derivatives	Amino acids, peptides, and analogues	NA	NA	NA	480898	1.07592e+06	8.15519e+06	7.61358e+06	1.39091e+07	3.13467e+06	6.97111e+06	1.08098e+07	5.19902e+06	5.30762e+06	521544	1.29105e+06	3.65438e+06	1.06149e+06	469041	1.15981e+06	558172	2.61424e+06	6.45448e+06	316748	4.03789e+06
A3731	A3731_1-Palmitoyl-2-linoleoyl-3-acetyl-rac-glycerol	HMDB0251679	NEG	0.844	633.51	C39 H70 O6	1-Palmitoyl-2-linoleoyl-3-acetyl-rac-glycerol	0.00041290656247383	0.650741282725523	NA	4	HMDB	NA	HMDB0251679	Lipids and lipid-like molecules	Triradylcglycerols	Glycerolipids	Glycerolipids[GL]	NA	NA	NA	1.03298e+06	800506	202902	695479	967994	3.83106e+06	687201	2.42622e+06	1.50643e+06	637691	7.82863e+06	4.51683e+06	1.2152e+06	818483	2.12184e+06	6.6237e+06	703831	1.03464e+06	1.26167e+06	8.73798e+06	2.38256e+06
C3439	C3439_1-Palmitoyl-2-oleoyl-sn-glycero-3-phosphocholine	HMDB0243985	POS	11.877	760.584	C42 H82 N O8 P	1-Palmitoyl-2-oleoyl-sn-glycero-3-phosphocholine	-0.00124914643720331	-1.64452730105508	NA	4	HMDB	NA	HMDB0243985	Lipids and lipid-like molecules	Glycerophosphocholines	Glycerophospholipids	Glycerophospholipids[GP]	NA	NA	NA	93571.2	94493.1	178287	143018	501723	2.57655e+08	84482.4	1.02622e+06	90780.2	110263	3.38741e+08	8.64081e+06	108914	83149.9	91631.2	2.27551e+08	475481	2.89796e+07	803160	4.95127e+08	6.8029e+07
C866	C866_1-Palmitoylglycerol	Reference406	POS	9.702	353.266	C19 H38 O4	1-Palmitoylglycerol	-0.0001005929520943	-0.304571463313192	62.2198079431989	2	mzCloud	NA	NA	NA	NA	NA	NA	NA	NA	NA	6.94626e+07	6.30208e+07	4.37208e+07	7.6921e+07	6.54231e+07	9.0462e+08	5.9089e+07	1.49698e+08	6.30298e+07	7.59986e+07	2.50892e+08	7.65655e+07	1.09691e+08	8.7495e+07	6.33687e+07	1.33395e+08	7.92813e+07	7.05081e+07	7.84975e+07	2.53564e+08	1.38712e+08
C4409	C4409_1-Palmitoylphosphatidylcholine	HMDB0256091	POS	10.2	496.34	C24 H50 N O7 P	1-Palmitoylphosphatidylcholine	0.00048878275828201	0.986777102126766	NA	4	HMDB	NA	HMDB0256091	Lipids and lipid-like molecules	Glycerophosphocholines	Glycerophospholipids	Glycerophospholipids[GP]	NA	NA	NA	182029	118214	43293.6	45475.2	186027	862585	129860	78251.9	49640	157427	1.18217e+06	222369	58094.6	143880	51714.3	1.39964e+06	153430	127388	108819	3.42924e+06	436477
C3440	C3440_1-Pentene	HMDB0243987	POS	9.201	71.0858	C5 H10	1-Pentene	0.00031518816886944	4.4976603656647	NA	4	HMDB	NA	HMDB0243987	Hydrocarbons	Unsaturated aliphatic hydrocarbons	Unsaturated hydrocarbons	Unsaturated aliphatic hydrocarbons	NA	NA	NA	1.37373e+06	956459	1.44131e+06	621681	1.27592e+06	9.25695e+06	1.90702e+06	2.98604e+06	2.10002e+06	1.53672e+06	2.42138e+06	1.60005e+06	3.28621e+06	3.07536e+06	684621	8.91445e+06	1.95061e+06	4.48955e+06	630945	9.39719e+06	2.99531e+06
A1619	A1619_1-Pentyl-1H-indole-3-carboxylic acid	Reference4932	POS	0.901	232.133	C14 H17 N O2	1-Pentyl-1H-indole-3-carboxylic acid	0.00011308584117841	0.489282365719812	33.4870726115552	3	mzCloud	NA	NA	NA	NA	NA	NA	NA	NA	NA	467744	1.88372e+06	3.34731e+06	1.04682e+06	498112	678937	956278	978603	4.50682e+06	2.5699e+06	6.66783e+06	1.13384e+06	1.57762e+06	122613	2.44277e+06	5.68938e+06	916938	3.19369e+06	5.22083e+06	1.50536e+06	2.27026e+06
C1930	C1930_1-Phenyl-1,3,8-triazaspiro[4.5]decan-4-one	Reference2563	POS	4.763	232.145	C13 H17 N3 O	1-Phenyl-1,3,8-triazaspiro[4.5]decan-4-one	0.00027561546875176	1.19243252030843	49.6581437452252	3	mzCloud	NA	NA	NA	NA	NA	NA	NA	NA	NA	66292.9	62766.4	635509	65319.1	70415.9	767012	104558	197430	147098	353009	8.93977e+06	109359	60496.9	61333	87727.2	437486	79957.4	75198.2	348456	299766	648448
C3441	C3441_1-Phenyl-1-cyclohexene	HMDB0243990	POS	5.284	159.117	C12 H14	1-Phenyl-1-cyclohexene	0.00022762700285738	1.43967902161965	NA	4	HMDB	NA	HMDB0243990	Benzenoids	NA	Benzene and substituted derivatives	Benzene and derivatives	NA	NA	NA	414027	443808	273598	311131	224803	1.33898e+06	445435	222571	250288	319514	83598.8	293611	557989	5.31126e+07	432638	5.94001e+06	401183	1.55286e+06	532126	2.65987e+07	4.68747e+06
A720	A720_1-Phenyl-1H-pyrazolo[3,4-d]pyrimidin-4-amine	Reference4209	NEG	8.7	210.078	C11 H9 N5	1-Phenyl-1H-pyrazolo[3,4-d]pyrimidin-4-amine	-0.00100640157810972	-4.76773710340114	64.1859061681376	2	mzCloud	NA	NA	NA	NA	NA	NA	NA	NA	NA	4.50001e+06	4.36449e+06	657382	7.49111e+06	7.82872e+06	532169	6.03187e+06	5.17709e+06	3.41934e+06	6.87843e+06	526863	6.18422e+06	4.66575e+06	1.2222e+06	1.87708e+06	622143	4.80551e+06	2.59258e+06	6.54213e+06	264147	3.80916e+06
C3704	C3704_1-Phenyl-2-decanoylamino-3-morpholino-1-propanol	HMDB0247335	POS	8.94	391.296	C23 H38 N2 O3	1-Phenyl-2-decanoylamino-3-morpholino-1-propanol	0.00011189389960009	0.286695542651261	NA	4	HMDB	NA	HMDB0247335	Organic nitrogen compounds	Amines	Organonitrogen compounds	Amines	NA	NA	NA	1.10856e+06	701808	291286	198166	1.90586e+06	255755	53536.3	368625	115409	351304	105632	149466	621281	94694.6	418793	157425	3.22069e+06	213088	93399.8	212575	531868
C4576	C4576_1-Phenyl-2-hexadecanoylamino-3-pyrrolidino-1-propanol	HMDB0257849	POS	8.845	459.395	C29 H50 N2 O2	1-Phenyl-2-hexadecanoylamino-3-pyrrolidino-1-propanol	0.00027006580381794	0.589165201185595	NA	4	HMDB	NA	HMDB0257849	Organic nitrogen compounds	Amines	Organonitrogen compounds	Amines	NA	NA	NA	77292.5	75457.4	73561.5	66672.3	68489.9	4.7406e+06	66926.6	64420.1	65281.4	74874.6	1.18615e+07	73131.6	70712.5	55361.4	67275.5	1.04478e+06	75495.7	70394.5	73033.8	3.98916e+06	1.13772e+06
C186	C186_1-Phenyl-3-methyl-5-pyrazolone	3.11_175.08766	POS	3.11	175.088	C10 H10 N2 O	1-Phenyl-3-methyl-5-pyrazolone	0.00106067671197252	6.09306582328841	67.7325160415307	2	mzCloud	NA	NA	NA	NA	NA	NA	NA	NA	NA	2.03194e+07	4.27902e+07	1.66631e+07	3.82755e+07	3.98918e+07	2.02887e+07	840547	2.86671e+07	3.44763e+07	1.97063e+07	1.68269e+07	3.96117e+07	2.16156e+07	1.61962e+07	465732	1.42244e+07	2.28186e+07	1.30874e+07	3.36444e+07	1.23211e+07	2.26365e+07
A1161	A1161_1-Phenyl-5-(2-tetrahydro-1H-pyrrol-1-ylvinyl)-1H-1,2,3,4-tetraazole	2.255_242.13888	POS	2.255	242.139	C13 H15 N5	1-Phenyl-5-(2-tetrahydro-1H-pyrrol-1-ylvinyl)-1H-1,2,3,4-tetraazole	-0.00113862856605351	-4.72199893021005	45.1090486744927	3	mzCloud	NA	NA	NA	NA	NA	NA	NA	NA	NA	4.40739e+06	2.51947e+06	3.40143e+06	1.9977e+06	3.92135e+06	101979	4.01475e+06	1.48621e+06	1.31089e+06	1.84347e+06	88702.2	2.31084e+06	1.40122e+06	1.3167e+06	1.91316e+06	304610	5.48489e+06	1.30417e+06	1.68495e+06	130523	2.04722e+06
A4070	A4070_1-Phenylbiguanide	HMDB0256437	POS	2.479	178.108	C8 H11 N5	1-Phenylbiguanide	-0.00073550980468439	-4.15304236119527	NA	4	HMDB	NA	HMDB0256437	Organic nitrogen compounds	Guanidines	Organonitrogen compounds	Guanidines	NA	NA	NA	1.57294e+06	970982	1.03855e+06	1.59009e+06	1.68642e+06	140064	1.35371e+06	800850	690838	1.49701e+06	128158	1.03634e+06	708871	608689	1.02658e+06	93796.1	1.19502e+06	298889	1.07759e+06	648055	908172
A629	A629_1-Phenylethanol	HMDB0032619	POS	3.605	105.07	C8 H10 O	1-Phenylethanol	-18.0103986300018	-147537.738083186	93.7732863422552	2	BMDB	C07112	HMDB0032619	Benzenoids	NA	Benzene and substituted derivatives	Benzene and derivatives	NA	NA	NA	1.2833e+06	2.68753e+06	842256	3.21574e+07	283823	1.98733e+06	4.64558e+06	2.59777e+07	4.48934e+06	1.21594e+06	5.30905e+06	333994	1.33446e+08	2.56729e+07	4.98005e+06	2.80293e+07	1.32676e+08	769382	921420	2.41897e+06	2.05064e+07
C4520	C4520_1-Piperidineethanol, alpha-((2-nitro-1H-imidazol-1-yl)methyl)-, 1-oxide	HMDB0257260	POS	0.693	253.129	C11 H18 N4 O4	1-Piperidineethanol, alpha-((2-nitro-1H-imidazol-1-yl)methyl)-, 1-oxide	-4.35696002796249e-05	-0.161289556406532	NA	4	HMDB	NA	HMDB0257260	Organoheterocyclic compounds	Imidazoles	Azoles	Imidazoles	NA	NA	NA	2.1831e+06	2.15358e+06	3.50229e+06	1.39823e+06	2.34693e+06	960060	4.09924e+06	5.41728e+06	2.14157e+06	2.80259e+06	1.30222e+06	5.32277e+06	5.93777e+06	5.35394e+06	6.10388e+06	3.94421e+06	5.13788e+06	4.86519e+06	803938	1.44094e+06	3.36088e+06
A3195	A3195_1-Pyrenemethanol	HMDB0244007	NEG	2.404	231.081	C17 H12 O	1-Pyrenemethanol	-0.00033842083769286	-1.45815229291076	NA	4	HMDB	NA	HMDB0244007	Benzenoids	NA	Pyrenes	Benzene and derivatives	NA	NA	NA	3.84743e+06	4.19988e+06	1.11177e+06	1.39409e+06	253564	2.8229e+06	187904	4.16135e+06	211006	149013	1.24527e+06	3.70892e+06	230964	1.91163e+06	923387	3.67875e+06	1.84585e+06	1.04256e+06	6.40059e+06	797518	2.00622e+06
C97	C97_1-Pyrroline-5-carboxylic acid	HMDB0001301	POS	1.235	114.055	C5 H7 N O2	1-Pyrroline-5-carboxylic acid	0.00010835341907977	0.958475402624382	88.394108305073	1	Decode	C03912	HMDB0001301	Organic acids and derivatives	Amino acids, peptides, and analogues	Carboxylic acids and derivatives	Amino acids, peptides, and analogues	Amino acid metabolism	Alanine, aspartate and glutamate metabolism	map00250 Alanine, aspartate and glutamate metabolism; map00330 Arginine and proline metabolism; map01100 Metabolic pathways; map01230 Biosynthesis of amino acids;	7.92504e+07	2.53733e+07	5.21541e+07	6.29708e+07	6.16772e+07	1.14682e+08	3.54903e+07	2.64615e+07	5.43171e+07	4.49915e+07	9.68606e+07	3.68289e+07	5.91073e+07	3.86494e+07	1.02236e+08	6.49064e+07	4.13025e+07	4.37547e+07	1.02685e+08	5.62334e+07	5.99967e+07
C562	C562_1-Stearoylglycerol	D01947	POS	10.001	381.297	C21 H42 O4	1-Stearoylglycerol	-9.45049291090072e-05	-0.263753104689878	80.8125691518738	2	mzCloud	D01947	NA	NA	NA	NA	NA	NA	NA	NA	3.50203e+07	3.86632e+07	1.97316e+07	2.52272e+07	1.98002e+07	4.83418e+08	3.87121e+07	4.43457e+07	3.96394e+07	6.23172e+06	1.79083e+08	4.71634e+07	4.32496e+07	3.2843e+07	3.54143e+07	1.39862e+08	3.38377e+07	3.61926e+07	4.3846e+07	4.29195e+08	8.85738e+07
C3495	C3495_1-Tert-butyl 4-ethyl 5-oxoazepane-1,4-dicarboxylate	HMDB0244604	POS	4.684	286.165	C14 H23 N O5	1-Tert-butyl 4-ethyl 5-oxoazepane-1,4-dicarboxylate	-0.00012704347767567	-0.445520188018194	NA	4	HMDB	NA	HMDB0244604	Organoheterocyclic compounds	NA	Azepanes	Azepanes	NA	NA	NA	4.2047e+06	3.12777e+06	2.63742e+06	6.73669e+06	4.98134e+06	346309	3.53898e+06	2.87354e+06	5.50129e+06	5.20777e+06	403718	2.79198e+06	4.33646e+06	1.40534e+06	6.09398e+06	696621	1.429e+06	1.90781e+06	4.05147e+06	1.43517e+06	3.18537e+06
C3511	C3511_1-Tert-butyl-3-(4-chlorophenyl)-1H-pyrazolo[3,4-d]pyrimidin-4-amine	HMDB0244786	POS	2.792	302.116	C15 H16 Cl N5	1-Tert-butyl-3-(4-chlorophenyl)-1H-pyrazolo[3,4-d]pyrimidin-4-amine	-0.00042783734375007	-1.42086999215004	NA	4	HMDB	NA	HMDB0244786	Organoheterocyclic compounds	Pyrazoles	Azoles	Pyrazoles	NA	NA	NA	1.73189e+06	923406	495954	761919	1.32217e+06	365411	1.49571e+06	945270	314228	315510	436508	741719	353463	190758	745739	229547	1.4071e+06	221799	1.07787e+06	695161	738557
A678	A678_1-Tetradecylamine	Reference1724	POS	1.901	214.253	C14 H31 N	1-Tetradecylamine	0.00051682000798791	2.42358992156496	75.8075894481119	2	mzCloud	NA	NA	NA	NA	NA	NA	NA	NA	NA	857641	777499	1.43038e+06	917965	484820	2.24902e+06	877552	651231	1.52087e+06	907549	1.04589e+07	1.05995e+06	2.09909e+06	2.2561e+06	1.90826e+06	5.09301e+06	1.63531e+06	1.86708e+06	498195	9.10378e+06	2.33271e+06
C3782	C3782_1-Tetralone	HMDB0248243	POS	6.024	147.081	C10 H10 O	1-Tetralone	0.00024694656249835	1.69056761840827	NA	4	HMDB	NA	HMDB0248243	Benzenoids	NA	Tetralins	Benzene and derivatives	NA	NA	NA	635884	847049	3.25023e+06	3.06571e+06	6.62921e+06	1.89098e+06	1.68275e+06	5.29577e+06	2.33061e+06	4.78445e+06	684061	973881	2.28253e+06	3.66358e+06	457432	804613	698362	1.18033e+06	1.19251e+07	678365	2.68804e+06
A3196	A3196_1-Vinylimidazole	HMDB0244017	NEG	8.316	93.046	C5 H6 N2	1-Vinylimidazole	0.00019334418624339	2.05569183774647	NA	4	HMDB	NA	HMDB0244017	Organoheterocyclic compounds	Imidazoles	Azoles	Imidazoles	NA	NA	NA	2.14597e+06	2.44936e+06	3.33013e+06	1.50558e+06	2.89907e+06	1.12967e+07	4.42295e+06	4.22868e+06	1.45673e+06	1.62408e+06	4.78618e+06	6.87177e+06	2.82965e+06	3.46446e+06	1.00444e+06	4.29158e+06	1.65456e+06	5.24448e+06	3.2438e+06	5.19546e+06	3.69728e+06
C1490	C1490_1-[(1-benzylpiperidin-4-yl)amino]-3-[(4-fluorophenyl)thio]propan-2-ol	5.571_392.21786	POS	5.571	392.218	C21 H27 F N2 O S	1-[(1-benzylpiperidin-4-yl)amino]-3-[(4-fluorophenyl)thio]propan-2-ol	0.00119658302787684	3.19785673876839	45.5757275704644	3	mzCloud	NA	NA	NA	NA	NA	NA	NA	NA	NA	1.39371e+06	1.56124e+06	2.49201e+06	2.95152e+06	922723	161432	2.34947e+06	3.56259e+06	1.28346e+06	2.08262e+06	630469	1.69811e+06	4.45821e+06	5.15155e+06	1.91908e+06	436928	4.06273e+06	2.91314e+06	3.00019e+06	1.03123e+06	2.20312e+06
C1484	C1484_1-[(1S,2S,3S,4R,5R)-3-Hydroxy-4-(1-piperidinyl)-6,8-dioxabicyclo[3.2.1]oct-2-yl]-3-phenylurea	5.51_348.19165	POS	5.51	348.192	C18 H25 N3 O4	1-[(1S,2S,3S,4R,5R)-3-Hydroxy-4-(1-piperidinyl)-6,8-dioxabicyclo[3.2.1]oct-2-yl]-3-phenylurea	-0.00013104742259884	-0.377457577390338	12.8128113175755	3	mzCloud	NA	NA	NA	NA	NA	NA	NA	NA	NA	3.02875e+06	2.34908e+06	2.07599e+06	2.50045e+06	2.14281e+06	714226	2.15157e+06	895556	1.63533e+06	2.28432e+06	333788	1.83033e+06	1.68502e+06	2.01019e+06	3.72807e+06	697360	2.35771e+06	1.03312e+06	1.79113e+06	446217	1.78455e+06
A1296	A1296_1-[(2-chlorophenyl)sulfonyl]-3-methyl-4-(2-methylallyl)-4,5-dihydro-1H-pyrazol-5-one	4.665_325.04172	NEG	4.665	325.042	C14 H15 Cl N2 O3 S	1-[(2-chlorophenyl)sulfonyl]-3-methyl-4-(2-methylallyl)-4,5-dihydro-1H-pyrazol-5-one	-0.00019882170960272	-0.609790532546214	4.53300781014152	3	mzCloud	NA	NA	NA	NA	NA	NA	NA	NA	NA	3.57386e+07	2.50459e+07	3.0022e+07	6.37669e+06	1.46659e+07	8.13073e+07	2.5223e+07	2.84848e+07	3.97524e+07	2.2582e+07	7.01949e+07	2.18422e+07	7.17108e+07	2.30604e+07	2.93385e+06	3.31088e+07	2.40417e+07	2.99533e+07	1.88756e+07	3.27674e+07	3.18844e+07
C4937	C4937_1-[(2E,4E)-6,7-Dihydroxy-2,4-octadienoyl]prolyl-N-methylvalyl-N2-methylalaninamide	PB01788	POS	7.66	484.313	C23 H38 N4 O6	1-[(2E,4E)-6,7-Dihydroxy-2,4-octadienoyl]prolyl-N-methylvalyl-N2-methylalaninamide	17.0261583181556	36514.9479134414	6.92452806187768	4	Public	NA	NA	NA	NA	NA	NA	NA	NA	NA	7.09677e+06	6.08559e+06	7.50364e+06	2.47296e+06	3.6544e+06	2.69129e+06	5.61702e+06	2.2054e+06	5.14122e+06	5.43178e+06	945104	4.86669e+06	6.34586e+06	4.50884e+06	9.75073e+06	2.26994e+06	9.13282e+06	3.40722e+06	3.04026e+06	1.76616e+06	4.69669e+06
C4591	C4591_1-[(2R,3R,4S,5R)-3,4-Dihydroxy-5-(hydroxymethyl)oxolan-2-yl]oxypyrimidin-2-one	HMDB0257989	POS	0.718	245.077	C9 H12 N2 O6	1-[(2R,3R,4S,5R)-3,4-Dihydroxy-5-(hydroxymethyl)oxolan-2-yl]oxypyrimidin-2-one	7.19341175852151e-05	0.29472796472643	NA	4	HMDB	NA	HMDB0257989	Organic oxygen compounds	Carbohydrates and carbohydrate conjugates	Organooxygen compounds	Carbohydrates	NA	NA	NA	9.08149e+06	1.3255e+07	1.31821e+07	7.89655e+06	1.12019e+07	3.77767e+06	9.35873e+06	8.55081e+06	1.03808e+07	1.70118e+07	1.51048e+07	1.31474e+07	1.83203e+07	4.66827e+06	9.22619e+06	1.37179e+07	1.32511e+07	1.18779e+07	1.74327e+07	1.59753e+07	1.18209e+07
A1722	A1722_1-[(2R,4S,5R)-5-(1-Methyl-3-phenyl-1H-pyrazol-5-yl)-1-azabicyclo[2.2.2]oct-2-yl]-N-(2-pyridinylmethyl)methanamine	Reference9025	POS	1.37	388.248	C24 H29 N5	1-[(2R,4S,5R)-5-(1-Methyl-3-phenyl-1H-pyrazol-5-yl)-1-azabicyclo[2.2.2]oct-2-yl]-N-(2-pyridinylmethyl)methanamine	-0.00146458984374931	-3.78210195365896	41.1396775310333	3	mzCloud	NA	NA	NA	NA	NA	NA	NA	NA	NA	28970	24892.3	3.74748e+06	28424.3	24981.6	26490.4	23870.6	22364	33093	25785.8	55801.5	21558.9	27825.2	31678	45306	44634.1	22920.9	21154.6	23201.1	66249.6	217334
A1721	A1721_1-[(2R,4S,5R)-5-(3-Cyclohexyl-1-methyl-1H-pyrazol-5-yl)-1-azabicyclo[2.2.2]oct-2-yl]methanamine	Reference9011	POS	1.099	285.242	C18 H30 N4	1-[(2R,4S,5R)-5-(3-Cyclohexyl-1-methyl-1H-pyrazol-5-yl)-1-azabicyclo[2.2.2]oct-2-yl]methanamine	-0.0014512056689	-4.80138907487867	20.58242074014	3	mzCloud	NA	NA	NA	NA	NA	NA	NA	NA	NA	1.26917e+06	3.25956e+06	2.76584e+06	1.48681e+06	913585	1.5582e+06	2.49272e+06	2.50019e+06	5.02981e+06	2.19553e+06	700824	2.78673e+06	4.43123e+06	1.78891e+06	1.24994e+06	478835	2.01487e+06	5.32005e+06	3.00121e+06	142180	2.26931e+06
A4161	A4161_1-[(2S,5S)-3,4-Dihydroxy-5-(hydroxymethyl)oxolan-2-yl]-1,3-diazinane-2,4-dione	HMDB0257954	NEG	12.522	245.078	C9 H14 N2 O6	1-[(2S,5S)-3,4-Dihydroxy-5-(hydroxymethyl)oxolan-2-yl]-1,3-diazinane-2,4-dione	0.00024612757812292	1.00017226596858	NA	4	HMDB	NA	HMDB0257954	Nucleosides, nucleotides, and analogues	NA	Pyrimidine nucleosides	Nucleic acids and analogues	NA	NA	NA	741477	283590	609431	191974	539440	242921	396554	148380	107756	516391	62755.5	515659	284014	2.1211e+06	41830.5	95744	366449	405534	310159	61417.2	402129
C275	C275_1-[(3,5-dimethylisoxazol-4-yl)sulfonyl]piperidine	4.195_245.09522	POS	4.195	245.095	C10 H16 N2 O3 S	1-[(3,5-dimethylisoxazol-4-yl)sulfonyl]piperidine	-0.00022233333123722	-0.910873057188934	62.4562943991544	2	mzCloud	NA	NA	NA	NA	NA	NA	NA	NA	NA	4.05151e+06	4.72239e+06	3.08354e+06	4.36376e+06	4.58051e+06	742684	5.67766e+06	5.52448e+06	5.12672e+06	7.14672e+06	698599	2.83319e+06	4.15502e+06	5.25871e+06	3.51203e+06	1.74659e+06	8.8335e+06	1.59323e+06	2.68951e+06	1.06142e+06	3.87009e+06
A4297	A4297_1-[(4-Aminophenyl)methyl]-3-(3-nitrophenyl)imidazo[4,5-b]pyridin-2-one	HMDB0260034	NEG	0.8	360.109	C19 H15 N5 O3	1-[(4-Aminophenyl)methyl]-3-(3-nitrophenyl)imidazo[4,5-b]pyridin-2-one	-0.00105885028631292	-2.93214900367199	NA	4	HMDB	NA	HMDB0260034	Organoheterocyclic compounds	Imidazoles	Azoles	Imidazoles	NA	NA	NA	3.28697e+07	4.0749e+07	3.27747e+07	3.73846e+07	1.57224e+07	1.46856e+07	2.40815e+07	2.20279e+07	8.37158e+07	1.2686e+07	2.26514e+07	6.73778e+06	8.83279e+07	839449	1.71045e+08	4.46921e+07	1.43775e+07	1.09722e+07	1.15666e+07	2.17399e+07	3.54824e+07
C1154	C1154_1-[1,1'-biphenyl]-4-yl-2-(2-methyl-4-nitro-1H-imidazol-1-yl)-1-ethanol	3.418_346.11498	POS	3.418	346.115	C18 H17 N3 O3	1-[1,1'-biphenyl]-4-yl-2-(2-methyl-4-nitro-1H-imidazol-1-yl)-1-ethanol	21.9807087963587	68024.9851838311	36.1996757122509	3	mzCloud	NA	NA	NA	NA	NA	NA	NA	NA	NA	2.60406e+06	1.59634e+06	3.75748e+06	4.94049e+06	1.62116e+06	1.18253e+06	1.42612e+06	1.38602e+06	447866	3.24515e+06	230217	577498	1.41281e+06	2.35525e+06	1.25619e+06	1.86962e+06	3.07669e+06	4.09203e+06	2.14819e+06	1.08307e+06	2.01544e+06
A3476	A3476_1-[1-(2-Methoxyethyl)piperidin-3-YL]-N-methylmethanamine	HMDB0247651	POS	4.599	187.181	C10 H22 N2 O	1-[1-(2-Methoxyethyl)piperidin-3-YL]-N-methylmethanamine	0.00019678319245031	1.05698982686351	NA	4	HMDB	NA	HMDB0247651	Organoheterocyclic compounds	NA	Piperidines	Piperidines	NA	NA	NA	2.05683e+06	3.53397e+06	9.15062e+06	6.399e+06	1.11477e+07	538807	450507	4.8899e+07	1.23402e+07	4.7514e+06	3.18908e+06	765694	1.02499e+07	1.92009e+07	7.04145e+06	1.16108e+07	878674	1.10682e+06	974888	6.81835e+07	1.11235e+07
C1223	C1223_1-[1-(3,5-dichlorophenyl)-5-methyl-1H-1,2,3-triazol-4-yl]ethan-1-one	3.815_270.01879	POS	3.815	270.019	C11 H9 Cl2 N3 O	1-[1-(3,5-dichlorophenyl)-5-methyl-1H-1,2,3-triazol-4-yl]ethan-1-one	-0.00075316129499469	-2.79972843855024	18.2843352749386	3	mzCloud	NA	NA	NA	NA	NA	NA	NA	NA	NA	1.73688e+06	2.31415e+06	761059	2.3788e+06	5.3857e+06	3.56021e+06	1.40193e+06	1.93613e+06	2.22664e+06	1.78121e+06	4.22914e+06	2.65359e+06	2.48382e+06	5.58464e+06	1.99109e+06	2.83997e+06	2.02191e+06	1.38441e+06	5.19339e+06	9.44916e+06	3.06569e+06
C3733	C3733_1-[2,3-Dimethyl-2-(2-methylbut-3-en-2-yl)furan-3-yl]-3,5-dihydroxy-4-methoxyhexan-2-one	HMDB0247708	POS	6.47	327.216	C18 H30 O5	1-[2,3-Dimethyl-2-(2-methylbut-3-en-2-yl)furan-3-yl]-3,5-dihydroxy-4-methoxyhexan-2-one	-0.00017124079579389	-0.524941450926726	NA	4	HMDB	NA	HMDB0247708	Lipids and lipid-like molecules	Fatty alcohols	Fatty Acyls	Fatty acyls[FA]	NA	NA	NA	2.09593e+07	4.39262e+06	1.62265e+07	6.02642e+06	8.47165e+06	4.94351e+06	1.39122e+07	1.67854e+07	1.25812e+07	1.46542e+07	672754	1.39052e+07	1.2199e+07	1.57379e+07	2.29613e+07	4.20198e+06	2.56681e+07	1.02515e+07	1.25666e+07	2.68725e+06	1.19902e+07
C817	C817_1-[2-hydroxy-4-(3-hydroxy-5-methylphenoxy)-6-methylphenyl]-3-methylbutane-2,3-diol	PB01769	POS	3.432	355.151	C19 H24 O5	1-[2-hydroxy-4-(3-hydroxy-5-methylphenoxy)-6-methylphenyl]-3-methylbutane-2,3-diol	21.9809269689566	66175.2465301372	76.9602578753284	2	Public	NA	NA	NA	NA	NA	NA	NA	NA	NA	1.07528e+07	8.31225e+06	818848	1.18089e+07	7.82602e+06	1.22206e+06	1.23898e+07	5.86186e+06	8.22212e+06	1.07754e+07	2.33565e+06	9.31036e+06	8.97727e+06	965736	1.04923e+07	3.08065e+06	1.57844e+07	4.71706e+06	7.89449e+06	579436	7.10638e+06
A3170	A3170_1-[3,4-Dihydroxy-5-(hydroxymethyl)oxolan-2-yl]-4-hydroxyhydropyridin-2-one	HMDB0243807	NEG	13.583	242.067	C10 H13 N O6	1-[3,4-Dihydroxy-5-(hydroxymethyl)oxolan-2-yl]-4-hydroxyhydropyridin-2-one	0.00031141734373818	1.28116119394807	NA	4	HMDB	NA	HMDB0243807	Organic oxygen compounds	Carbohydrates and carbohydrate conjugates	Organooxygen compounds	Carbohydrates	NA	NA	NA	5.25979e+06	4.88424e+06	1.9247e+07	3.02648e+06	6.52427e+06	4.59487e+06	5.56712e+06	3.15744e+06	4.90568e+06	8.41201e+06	618187	5.83873e+06	7.31696e+06	4.09463e+06	1.39356e+06	3.05447e+06	5.03628e+06	1.0309e+07	8.53391e+06	1.64558e+06	5.67101e+06
C816	C816_1-[4,5-bis(hydroxymethyl)-3-methoxy-2-methylphenoxy]-3-methylbutane-2,3-diol	PB01512	POS	5.28	339.12	C15 H24 O6	1-[4,5-bis(hydroxymethyl)-3-methoxy-2-methylphenoxy]-3-methylbutane-2,3-diol	37.9557074383807	126452.726338318	77.8536377047017	2	Public	NA	NA	NA	NA	NA	NA	NA	NA	NA	7.27325e+06	6.70337e+06	4.52466e+06	5.55743e+06	6.29225e+06	4.67913e+06	5.01619e+06	3.69116e+06	5.42453e+06	5.67632e+06	2.19379e+06	5.17945e+06	4.00559e+06	2.80768e+06	6.71487e+06	3.65915e+06	712169	4.3644e+06	4.72567e+06	4.06487e+06	4.6633e+06
C1541	C1541_1-[4-(1,3-benzodioxol-5-ylmethyl)piperazino]-2,2-dimethylpropan-1-one	6.549_305.18634	POS	6.549	305.186	C17 H24 N2 O3	1-[4-(1,3-benzodioxol-5-ylmethyl)piperazino]-2,2-dimethylpropan-1-one	0.00037118203124464	1.22027624015853	38.5409412187086	3	mzCloud	NA	NA	NA	NA	NA	NA	NA	NA	NA	413293	1.09e+06	1.93467e+06	1.00148e+06	1.83674e+06	2.08757e+06	894035	1.90778e+06	965318	729842	417320	719025	1.08963e+06	789415	891734	105606	1.09731e+06	710601	362480	1.46558e+06	1.02547e+06
A1034	A1034_1-[4-(4-Fluorophenyl)-1-piperazinyl]-2-[(3R,4S)-3-{[5-(1-piperidinylmethyl)-1,2-oxazol-3-yl]methyl}-4-piperidinyl]ethanone	1.617_484.31215	POS	1.617	484.312	C27 H38 F N5 O2	1-[4-(4-Fluorophenyl)-1-piperazinyl]-2-[(3R,4S)-3-{[5-(1-piperidinylmethyl)-1,2-oxazol-3-yl]methyl}-4-piperidinyl]ethanone	0.00392058045372323	8.1120892168874	38.652533784909	3	mzCloud	NA	NA	NA	NA	NA	NA	NA	NA	NA	2.57177e+06	2.59426e+06	333661	2.81205e+06	2.14107e+06	395086	1.84431e+06	1.67034e+06	2.41636e+06	1.79218e+06	84422.5	1.45369e+06	3.07426e+06	2.77383e+06	2.28981e+06	351075	3.36019e+06	1.58753e+06	1.08286e+06	381526	1.75051e+06
C2060	C2060_1-[4-Bromo-3-(trifluoromethyl)phenyl]-3-phenylurea	Reference8671	POS	0.616	358.999	C14 H10 Br F3 N2 O	1-[4-Bromo-3-(trifluoromethyl)phenyl]-3-phenylurea	-0.00095391850396708	-2.66462996971679	2.70764365024689	3	mzCloud	NA	NA	NA	NA	NA	NA	NA	NA	NA	4.01706e+06	7.61892e+06	6.21536e+06	3.62023e+06	2.68949e+06	2.30142e+07	9.94716e+06	7.82554e+06	8.59873e+06	8.22139e+06	1.73763e+07	1.48542e+07	5.6428e+06	3.14333e+06	2.58485e+06	2.00104e+07	7.94378e+06	8.66571e+06	9.95757e+06	5.56266e+07	1.13787e+07
C144	C144_1-[4-hydroxy-5-(hydroxymethyl)tetrahydrofuran-2-yl]pyrimidine-2,4(1H,3H)-dione	0.765_227.06708	NEG	0.765	227.067	C9 H12 N2 O5	1-[4-hydroxy-5-(hydroxymethyl)tetrahydrofuran-2-yl]pyrimidine-2,4(1H,3H)-dione	-0.00039136977625275	-1.71597249145493	73.9187910084252	2	mzCloud	NA	NA	NA	NA	NA	NA	NA	NA	NA	1.0255e+07	9.25016e+06	3.85623e+06	8.78965e+06	6.9427e+06	1.90828e+06	5.09429e+06	3.88421e+06	1.02117e+07	1.06008e+06	3.39903e+06	4.65649e+06	6.12637e+06	6.65862e+06	3.48457e+07	9.10572e+06	5.04926e+06	3.9435e+06	1.10372e+07	1.33518e+07	7.9713e+06
C1954	C1954_1-[5-Nitro-2-(1-pyrrolidinyl)benzyl]-1H-imidazole	Reference3527	POS	3.969	295.116	C14 H16 N4 O2	1-[5-Nitro-2-(1-pyrrolidinyl)benzyl]-1H-imidazole	21.9814135283075	80776.2082450914	39.6469510233473	3	mzCloud	NA	NA	NA	NA	NA	NA	NA	NA	NA	7.43141e+06	7.82663e+06	1.24924e+07	8.62115e+06	8.22478e+06	1.53263e+06	9.69575e+06	8.47685e+06	1.17479e+07	1.27466e+07	68064.2	2.98658e+06	1.28671e+07	4.60008e+06	4.06268e+06	3.99401e+06	5.53626e+06	1.30823e+07	7.70626e+06	65730	7.18825e+06
C1133	C1133_1-[6,7-bis(2-methoxyethoxy)quinazolin-4-yl]piperidine-4-carboxylic acid	3.297_406.19778	POS	3.297	406.198	C20 H27 N3 O6	1-[6,7-bis(2-methoxyethoxy)quinazolin-4-yl]piperidine-4-carboxylic acid	0.00052097540606155	1.28575587951512	32.4407499449088	3	mzCloud	NA	NA	NA	NA	NA	NA	NA	NA	NA	4.25704e+06	2.48473e+06	3.75919e+06	3.7328e+06	2.71476e+06	800804	2.19504e+06	2.85212e+06	4.32645e+06	4.81991e+06	2.52568e+06	6.81985e+06	5.56408e+06	2.70913e+06	2.54744e+06	4.25409e+06	1.88816e+06	5.67474e+06	1.05013e+06	6.27815e+06	3.56271e+06
C4553	C4553_1-[6-(2-Carboxypyrrolidin-1-yl)-6-oxohexanoyl]pyrrolidine-2-carboxylic acid	HMDB0257669	POS	5.045	323.16	C16 H24 N2 O6	1-[6-(2-Carboxypyrrolidin-1-yl)-6-oxohexanoyl]pyrrolidine-2-carboxylic acid	-7.35492081389566e-05	-0.216217265837376	NA	4	HMDB	NA	HMDB0257669	Organic acids and derivatives	Amino acids, peptides, and analogues	Carboxylic acids and derivatives	Amino acids, peptides, and analogues	NA	NA	NA	5.9205e+06	5.29218e+06	9.42394e+06	4.77326e+06	5.59556e+06	1.51613e+06	1.8625e+06	5.34777e+06	2.98e+06	4.81308e+06	2.72747e+06	4.6021e+06	5.25724e+06	7.9601e+06	6.08419e+06	1.5512e+06	6.26897e+06	6.60116e+06	4.30941e+06	1.01746e+06	4.69521e+06
C4793	C4793_1-[[(Z)-[5-(Hydroxymethyl)indol-3-ylidene]methyl]amino]-2-pentylguanidine	HMDB0260010	POS	6.56	302.196	C16 H23 N5 O	1-[[(Z)-[5-(Hydroxymethyl)indol-3-ylidene]methyl]amino]-2-pentylguanidine	-0.00131795625588893	-4.37582627877787	NA	4	HMDB	NA	HMDB0260010	Organoheterocyclic compounds	Indoles	Indoles and derivatives	Indoles	NA	NA	NA	2.32598e+06	922208	2.11646e+06	3.34376e+06	2.43805e+06	253509	1.61505e+06	1.73642e+06	2.57426e+06	2.04319e+06	193707	1.17366e+06	2.44018e+06	569806	2.64692e+06	1.04495e+06	2.11827e+06	1.73218e+06	764528	1.39661e+06	1.67248e+06
A3169	A3169_1-[[4-(Dimethylamino)-3-methylphenyl]methyl]-5-(2,2-diphenylacetyl)-6,7-dihydro-4H-imidazo[4,5-c]pyridine-6-carboxylic acid	HMDB0243806	NEG	0.73	507.239	C31 H32 N4 O3	1-[[4-(Dimethylamino)-3-methylphenyl]methyl]-5-(2,2-diphenylacetyl)-6,7-dihydro-4H-imidazo[4,5-c]pyridine-6-carboxylic acid	-0.00134452023939957	-2.64540483940079	NA	4	HMDB	NA	HMDB0243806	Benzenoids	Diphenylmethanes	Benzene and substituted derivatives	Benzene and derivatives	NA	NA	NA	77224.6	66664.9	84301.7	103053	91765.2	101489	97624.5	116781	94292.2	46550.2	322232	72804.6	78439.6	2.4876e+07	233029	231271	897996	66337.3	78980.6	353126	1.4045e+06
C1065	C1065_1-acetyl-3-(2-furylmethylene)tetrahydropyrazine-2,5-dione	2.343_217.15458	POS	2.343	217.155	C11 H10 N2 O4	1-acetyl-3-(2-furylmethylene)tetrahydropyrazine-2,5-dione	-17.916753466703	-76546.36820068	22.8904363603721	3	mzCloud	NA	NA	NA	NA	NA	NA	NA	NA	NA	6.38871e+06	5.12711e+06	1.92071e+07	8.28573e+06	1.82237e+06	515647	6.76495e+06	2.71157e+07	4.25355e+06	3.11689e+06	2.82243e+06	4.53561e+06	5.04058e+06	2.46916e+07	6.31291e+06	2.69446e+06	6.35028e+06	4.72707e+06	2.27749e+06	2.49864e+07	8.35183e+06
A236	A236_1-adamantyl(piperidino)methanone	13.514_270.18109	POS	13.514	270.181	C16 H25 N O	1-adamantyl(piperidino)methanone	21.9802003285938	88918.964943294	81.1872017728148	2	mzCloud	NA	NA	NA	NA	NA	NA	NA	NA	NA	731265	237075	266064	220640	865760	51375	112475	278752	13606.1	73743.5	29886.4	499922	43165.2	5.05607e+06	17343.3	21905	352458	22330.2	85251.6	27881	450348
C1074	C1074_1-benzothiophen-2-yl[4-(2-pyridinyl)piperazino]methanone	2.53_324.11752	POS	2.53	324.118	C18 H17 N3 O S	1-benzothiophen-2-yl[4-(2-pyridinyl)piperazino]methanone	0.00101375335930243	3.1374942476452	53.1576823890273	3	mzCloud	NA	NA	NA	NA	NA	NA	NA	NA	NA	1.26962e+06	2.04899e+06	1.56384e+06	1.23951e+06	776669	1.74745e+06	1.12801e+06	1.86229e+06	1.88605e+06	2.25403e+06	2.6062e+06	2.41991e+06	3.16402e+06	544328	635590	1.46273e+06	1.83213e+06	1.98248e+06	2.75209e+06	1.01584e+06	1.70959e+06
C1545	C1545_1-benzyl-1,3-dihydro-2H-benzimidazol-2-one	6.559_225.10258	POS	6.559	225.103	C14 H12 N2 O	1-benzyl-1,3-dihydro-2H-benzimidazol-2-one	0.00033998435657167	1.51714412533388	40.3573967462497	3	mzCloud	NA	NA	NA	NA	NA	NA	NA	NA	NA	117942	300192	630131	104240	166586	47766.2	286565	2.6435e+06	223386	99477	50140.6	244927	365268	1.73572e+06	47397	216455	63049.1	479691	43174.1	59759.2	396268
C1231	C1231_1-benzyl-3-(2-methylphenyl)-3,7-dihydro-1H-purine-2,6-dione	3.848_333.13344	POS	3.848	333.133	C19 H16 N4 O2	1-benzyl-3-(2-methylphenyl)-3,7-dihydro-1H-purine-2,6-dione	-0.00115299054510842	-3.47153171678296	31.1506745009537	3	mzCloud	NA	NA	NA	NA	NA	NA	NA	NA	NA	1.78759e+07	2.00292e+07	1.35699e+07	1.90029e+07	2.07765e+07	6.5746e+06	2.16319e+07	3.50157e+07	1.16145e+07	7.48605e+06	1.50396e+06	9.51354e+06	2.51445e+06	2.72355e+07	1.62812e+07	3.98157e+06	2.84777e+07	9.186e+06	1.73336e+07	2.42654e+06	1.46016e+07
C1275	C1275_1-benzyl-3-butyl-4-hydroxy-6-phenylpyridin-2(1H)-one	4.094_334.17632	POS	4.094	334.176	C22 H23 N O2	1-benzyl-3-butyl-4-hydroxy-6-phenylpyridin-2(1H)-one	-0.00383952351035077	-11.5241178187809	37.7557240027042	3	mzCloud	NA	NA	NA	NA	NA	NA	NA	NA	NA	1.81965e+06	1.31718e+06	1.48895e+06	1.3418e+06	1.08758e+06	640403	1.3782e+06	823449	1.10573e+06	1.15114e+06	654468	1.02255e+06	1.17991e+06	230022	1.91779e+06	553657	1.86494e+06	431010	825813	178484	1.05064e+06
A3408	A3408_1-beta-D-Arabinofuranosyl-5-fluorocytosine	HMDB0246793	POS	1.318	262.083	C9 H12 F N3 O5	1-beta-D-Arabinofuranosyl-5-fluorocytosine	-0.00061151812496973	-2.34229838864088	NA	4	HMDB	NA	HMDB0246793	Nucleosides, nucleotides, and analogues	NA	Pyrimidine nucleosides	Nucleic acids and analogues	NA	NA	NA	18980.5	27081.1	14699.1	17259.5	15286.1	18198.5	15958.7	14162.8	230814	16608.2	40929.3	13771.8	20139.1	14537.1	5.63738e+06	31419.3	15702.5	15691.2	16363.5	50952.1	312297
A1297	A1297_1-bromo-2-naphthoic acid	4.667_248.95701	NEG	4.667	248.957	C11 H7 Br O2	1-bromo-2-naphthoic acid	0.00134306396182637	5.3730523053799	18.7303635347792	3	mzCloud	NA	NA	NA	NA	NA	NA	NA	NA	NA	4.80626e+06	3.8269e+06	4.99495e+06	1.92997e+06	3.72029e+06	1.33957e+07	4.15366e+06	4.24402e+06	6.33781e+06	4.39031e+06	1.62937e+07	4.57772e+06	7.46958e+06	3.93976e+06	1.7111e+06	1.14935e+07	3.93616e+06	5.56116e+06	3.74839e+06	1.47461e+07	6.26385e+06
A235	A235_1-butyl-2-methyl-4-nitro-1H-imidazole	13.503_184.10800	POS	13.503	184.108	C8 H13 N3 O2	1-butyl-2-methyl-4-nitro-1H-imidazole	-5.23975745352345e-05	-0.286167953577627	71.080783676736	2	mzCloud	NA	NA	NA	NA	NA	NA	NA	NA	NA	645194	976605	1.4055e+06	854047	1.84854e+06	872742	3.03681e+06	1.72112e+06	325670	1.31855e+06	124743	772409	1.31e+06	1.67816e+06	161189	53608.4	1.01891e+06	750156	2.7704e+06	204640	1.09245e+06
A1044	A1044_1-butyl-5-[2-(4-cyanophenyl)hydrazono]-4-methyl-2,6-dioxo-1,2,5,6-tetrahydropyridine-3-carbonitrile	1.67_336.14417	POS	1.67	336.144	C18 H17 N5 O2	1-butyl-5-[2-(4-cyanophenyl)hydrazono]-4-methyl-2,6-dioxo-1,2,5,6-tetrahydropyridine-3-carbonitrile	-0.00133630093745296	-3.98731281282307	29.4436321134339	3	mzCloud	NA	NA	NA	NA	NA	NA	NA	NA	NA	3.83884e+06	2.61139e+06	1.49137e+06	2.52887e+06	2.05492e+06	331627	3.22541e+06	1.84826e+06	2.34214e+06	2.4768e+06	126953	2.11549e+06	1.84358e+06	3.24916e+06	2.17796e+06	194508	4.76568e+06	853557	1.74833e+06	151798	1.99883e+06
C2151	C2151_1-eicosanylglycerol	10.558_395.34954	POS	10.558	395.35	C23 H48 O3	1-eicosanylglycerol	-1.95345209590414e-05	-0.0524613353939466	NA	4	NA	NA	NA	NA	NA	NA	NA	NA	NA	NA	127622	211642	1.536e+06	128522	64707.8	3.58828e+07	277834	578056	51659.4	2.24194e+06	1.25123e+08	4.18649e+06	102377	126472	97072	1.03487e+08	854860	9.71642e+06	1.2661e+06	9.87059e+07	1.92383e+07
C1564	C1564_1-hydroxy-2-(hydroxymethyl)-3-{[(2S,3R,4S,5S,6R)-3,4,5-trihydroxy-6-({[(2S,3R,4S,5R)-3,4,5-trihydroxyoxan-2-yl]oxy}methyl)oxan-2-yl]oxy}-9,10-dihydroanthracene-9,10-dione	7.101_547.14709	POS	7.101	547.147	C26 H28 O14	1-hydroxy-2-(hydroxymethyl)-3-{[(2S,3R,4S,5S,6R)-3,4,5-trihydroxy-6-({[(2S,3R,4S,5R)-3,4,5-trihydroxyoxan-2-yl]oxy}methyl)oxan-2-yl]oxy}-9,10-dihydroanthracene-9,10-dione	-18.0080871434375	-31920.8614907051	7.3943304903319	3	mzCloud	NA	NA	NA	NA	NA	NA	NA	NA	NA	5.98428e+06	4.70657e+06	5.14126e+06	5.5523e+06	3.68734e+06	3.16793e+06	2.09756e+06	3.02542e+06	3.99644e+06	5.45642e+06	940414	4.41457e+06	4.23542e+06	3.00442e+06	6.10981e+06	1.90527e+06	6.81609e+06	2.23668e+06	726029	494294	3.68493e+06
A884	A884_1-methyl 4-[(5R,9S,13S)-5,9,13-trimethyltetracyclo[11.2.1.0	0.896_420.31066	POS	0.896	420.311	C25 H38 O4	1-methyl 4-[(5R,9S,13S)-5,9,13-trimethyltetracyclo[11.2.1.0	17.0263717379883	42324.9933110961	13.2259392629814	3	mzCloud	NA	NA	NA	NA	NA	NA	NA	NA	NA	270902	174501	151912	225068	161777	2.08236e+06	221515	261006	445766	234854	5.02121e+06	268162	355597	169654	377022	1.91795e+06	108492	311506	180747	3.38676e+06	816338
C1157	C1157_1-methyl-3,5-di(1-naphthylmethylidene)piperidin-4-one	3.455_286.12946	POS	3.455	286.129	C28 H23 N O	1-methyl-3,5-di(1-naphthylmethylidene)piperidin-4-one	-104.055779119368	-267373.255084477	46.1411082688797	3	mzCloud	NA	NA	NA	NA	NA	NA	NA	NA	NA	3.62359e+06	4.12983e+06	1.32122e+06	1.2715e+07	4.77274e+06	146357	6.5772e+06	3.62276e+06	2.31994e+06	2.98236e+06	585810	3.21489e+06	2.95672e+06	2.7294e+06	3.66192e+06	923878	5.88356e+06	1.88106e+06	2.93135e+06	170857	3.35752e+06
A306	A306_1-methyl-3-phenyl-1H-pyrazol-5-amine	3.972_174.10281	POS	3.972	174.103	C10 H11 N3	1-methyl-3-phenyl-1H-pyrazol-5-amine	0.00023677165609115	1.36786879680361	83.065491928503	2	mzCloud	NA	NA	NA	NA	NA	NA	NA	NA	NA	1.34894e+07	1.10083e+07	1.12796e+08	8.78549e+06	4.03989e+06	2.11789e+06	2.72844e+07	2.38653e+08	4.48135e+07	2.63482e+07	6.68921e+06	3.80103e+06	2.42674e+08	9.86363e+07	5.08332e+06	9.75356e+07	4.15834e+07	2.21301e+08	6.64176e+06	1.57628e+07	6.14522e+07
A1332	A1332_1-methyl-N-(3-methyl-5-cinnolinyl)-1H-imidazole-4-sulfonamide	8.644_302.07324	NEG	8.644	302.073	C13 H13 N5 O2 S	1-methyl-N-(3-methyl-5-cinnolinyl)-1H-imidazole-4-sulfonamide	0.001519036960417	5.01201661620764	9.67918833747406	3	mzCloud	NA	NA	NA	NA	NA	NA	NA	NA	NA	2.25143e+06	6.09792e+06	2.15648e+06	1.46943e+06	3.0155e+06	3.81674e+07	6.17602e+06	9.70403e+06	2.01278e+06	8.39818e+06	9.34465e+06	8.16635e+06	6.14473e+06	4.82269e+06	715031	7.95439e+06	4.36548e+06	1.39185e+07	7.85612e+06	8.855e+06	7.57961e+06
C171	C171_1-morpholino-3-(4-nitrophenoxy)propan-2-ol	2.601_283.12891	POS	2.601	283.129	C13 H18 N2 O5	1-morpholino-3-(4-nitrophenoxy)propan-2-ol	6.4189915804036e-05	0.227525727485659	68.497382370009	2	mzCloud	NA	NA	NA	NA	NA	NA	NA	NA	NA	1.54678e+07	1.41486e+07	1.50921e+07	1.58118e+07	1.36241e+07	9.55454e+06	1.55496e+07	1.21322e+07	1.24703e+07	1.33412e+07	8.22635e+06	1.29688e+07	1.41086e+07	1.2346e+07	1.77674e+07	8.43131e+06	1.97231e+07	1.14774e+07	1.10429e+07	1.52244e+07	1.34254e+07
C1539	C1539_1-phenyl-2-(1-phenyl-1H-1,2,3,4-tetraazol-5-yl)-3-tetrahydro-1H-pyrrol-1-ylprop-2-en-1-one	6.517_346.16817	POS	6.517	346.168	C20 H19 N5 O	1-phenyl-2-(1-phenyl-1H-1,2,3,4-tetraazol-5-yl)-3-tetrahydro-1H-pyrrol-1-ylprop-2-en-1-one	0.00192483114574316	5.57665124728364	28.1530065486204	3	mzCloud	NA	NA	NA	NA	NA	NA	NA	NA	NA	1.1315e+06	3.5041e+06	1.94401e+07	2.13311e+06	1.60022e+06	5.49195e+06	1.11784e+07	2.4459e+07	1.50343e+06	1.00483e+06	1.8121e+06	3.11329e+06	4.74663e+06	6.01629e+06	1.21032e+06	6.40944e+06	1.57024e+06	4.96016e+06	1.75313e+07	1.43252e+06	6.01244e+06
A3171	A3171_1-{2-[(3-Ethylphenyl)amino]-2-oxoethyl}-6-oxo-1,6-dihydropyridine-3-carboxylic acid	HMDB0243809	POS	1.075	301.118	C16 H16 N2 O4	1-{2-[(3-Ethylphenyl)amino]-2-oxoethyl}-6-oxo-1,6-dihydropyridine-3-carboxylic acid	4.12012192896327e-05	0.137286598442246	NA	4	HMDB	NA	HMDB0243809	Organoheterocyclic compounds	Pyridinecarboxylic acids and derivatives	Pyridines and derivatives	Pyridine and derivatives	NA	NA	NA	233078	250459	1.48694e+06	342203	623903	2.09991e+06	1.60625e+06	2.27813e+06	701250	720712	755962	681700	840653	1.69691e+06	230523	490714	501600	1.76841e+06	367493	1.42046e+06	954863
C1281	C1281_1-{4-[(2R,3R)-3-(Hydroxymethyl)-4-methyl-5-oxo-2-morpholinyl]phenyl}-3-isopropylurea	4.134_304.16573	POS	4.134	304.166	C16 H23 N3 O4	1-{4-[(2R,3R)-3-(Hydroxymethyl)-4-methyl-5-oxo-2-morpholinyl]phenyl}-3-isopropylurea	-18.0103990136351	-56077.6634225957	47.2373404183731	3	mzCloud	NA	NA	NA	NA	NA	NA	NA	NA	NA	1.37808e+06	1.38029e+06	5.21009e+06	1.90965e+06	954742	1.82606e+06	2.35376e+06	2.66867e+06	2.28151e+06	1.84337e+06	1.89863e+06	5.86918e+06	5.01157e+06	1.47428e+07	2.36016e+06	7.53023e+06	1.68207e+06	8.41188e+06	1.04896e+06	5.47483e+06	3.79183e+06
C1608	C1608_1-{4-[(2S)-2-{3-[6-(4-Methyl-1-piperazinyl)-3-pyridinyl]-1,2,4-oxadiazol-5-yl}-1-pyrrolidinyl]-1-piperidinyl}ethanone	9.207_462.25943	POS	9.207	462.259	C23 H33 N7 O2	1-{4-[(2S)-2-{3-[6-(4-Methyl-1-piperazinyl)-3-pyridinyl]-1,2,4-oxadiazol-5-yl}-1-pyrrolidinyl]-1-piperidinyl}ethanone	21.9825801116406	50043.4845782781	30.3498477870589	3	mzCloud	NA	NA	NA	NA	NA	NA	NA	NA	NA	3.43292e+06	3.56977e+06	5.9824e+06	4.74548e+06	2.66493e+06	616663	3.84146e+06	2.94728e+06	7.71054e+06	1.3858e+07	654943	2.8927e+06	1.13947e+07	3.37151e+06	2.70084e+06	1.22338e+06	2.12918e+06	2.64364e+06	3.6522e+06	1.92655e+06	4.09796e+06
C1488	C1488_1-{4-[(3-{[5-(2-Hydroxy-2-propanyl)-1,2-oxazol-3-yl]methyl}-3-oxetanyl)amino]-1-piperidinyl}ethanone	5.548_320.19687	POS	5.548	320.197	C17 H27 N3 O4	1-{4-[(3-{[5-(2-Hydroxy-2-propanyl)-1,2-oxazol-3-yl]methyl}-3-oxetanyl)amino]-1-piperidinyl}ethanone	-18.0105639435156	-53412.0865955325	24.7075545223653	3	mzCloud	NA	NA	NA	NA	NA	NA	NA	NA	NA	49488.6	38663.2	38917.6	38993	50091.5	2.85495e+06	37190.8	37874.4	33977.4	35966.4	1.48998e+06	42874.6	43632.9	45773.1	39542	43341.1	39756.9	34800.9	36999.6	66703.4	254976
C939	C939_1-{4-[(3S)-3-(1-Methyl-1H-benzimidazol-2-yl)-1-pyrrolidinyl]-1-piperidinyl}ethanone	Reference8817	POS	9.713	327.217	C19 H26 N4 O	1-{4-[(3S)-3-(1-Methyl-1H-benzimidazol-2-yl)-1-pyrrolidinyl]-1-piperidinyl}ethanone	-0.00065189541567178	-1.99838782985821	77.661927911709	2	mzCloud	NA	NA	NA	NA	NA	NA	NA	NA	NA	3.53564e+06	2.98568e+06	1.22319e+06	1.89585e+06	3.99954e+06	6.51841e+06	3.01004e+06	2.75431e+06	2.99993e+06	3.0635e+06	1.19943e+07	4.68446e+06	3.07984e+06	2.76939e+06	2.47903e+06	7.7314e+06	2.85426e+06	3.38573e+06	3.86604e+06	1.19529e+07	4.33917e+06
C273	C273_1-{4-[(3S)-3-(5-Phenyl-1,3,4-oxadiazol-2-yl)-1-pyrrolidinyl]-1-piperidinyl}ethanone	4.129_379.15270	POS	4.129	379.153	C19 H24 N4 O2	1-{4-[(3S)-3-(5-Phenyl-1,3,4-oxadiazol-2-yl)-1-pyrrolidinyl]-1-piperidinyl}ethanone	37.9554970399052	111571.490358685	61.8328217879088	2	mzCloud	NA	NA	NA	NA	NA	NA	NA	NA	NA	952155	3.58931e+06	4.77374e+06	434352	1.79906e+06	1.68144e+06	1.54143e+06	2.47075e+06	2.44698e+06	2.14449e+06	2.53313e+06	401938	1.36912e+06	378931	425796	2.41233e+06	701075	2.42283e+06	2.62779e+06	161008	1.76338e+06
C1487	C1487_1-{4-[2-(7-methoxy-2H-1,3-benzodioxol-5-yl)ethyl]phenoxy}-3-methylbutane-2,3-diol	5.543_375.17778	POS	5.543	375.178	C21 H26 O6	1-{4-[2-(7-methoxy-2H-1,3-benzodioxol-5-yl)ethyl]phenoxy}-3-methylbutane-2,3-diol	-0.00243812437616953	-6.51603610545836	35.3441590665446	3	mzCloud	NA	NA	NA	NA	NA	NA	NA	NA	NA	2.07085e+06	1.6305e+06	1.22292e+06	1.43748e+06	1.05335e+06	1.01245e+06	1.28593e+06	705133	1.3776e+06	1.64136e+06	213231	1.34398e+06	1.51191e+06	1.15642e+06	1.67932e+06	758408	1.49702e+06	1.14034e+06	1.10167e+06	480358	1.21601e+06
C1615	C1615_1-{4-[2-nitro-4-(trifluoromethyl)phenyl]piperazino}ethan-1-one	9.354_335.13141	POS	9.354	335.131	C13 H14 F3 N3 O3	1-{4-[2-nitro-4-(trifluoromethyl)phenyl]piperazino}ethan-1-one	17.0254062414062	53691.1846535475	29.8961041234556	3	mzCloud	NA	NA	NA	NA	NA	NA	NA	NA	NA	106962	55059.3	50605.7	48188	166917	2.49831e+06	46525.3	162189	50606.6	56338.1	323061	135767	59816.2	49150	126267	711431	73727	53255.9	91664.9	673946	276989
C1171	C1171_1-{4-hydroxy-2-oxo-6-[(1E)-prop-1-en-1-yl]-2H-pyran-3-yl}butane-1,2-dione	3.549_254.10173	POS	3.549	254.102	C12 H12 O5	1-{4-hydroxy-2-oxo-6-[(1E)-prop-1-en-1-yl]-2H-pyran-3-yl}butane-1,2-dione	17.0259795410474	72123.055225096	28.5112001355812	3	mzCloud	NA	NA	NA	NA	NA	NA	NA	NA	NA	7.94884e+06	5.6116e+06	5.94429e+06	8.26302e+06	5.70425e+06	2.52086e+06	8.57606e+06	9.66263e+06	9.8663e+06	9.19478e+06	9.30288e+06	7.19048e+06	8.95722e+06	6.34022e+06	6.2024e+06	4.19941e+06	1.15953e+07	5.53973e+06	7.20195e+06	5.78877e+06	7.28055e+06
A847	A847_1-{[(1S,4S,6S)-6-Isopropyl-3-methyl-4-{[5-(4-pyridinyl)-1,3,4-oxadiazol-2-yl]methyl}-2-cyclohexen-1-yl]methyl}-3-phenylurea	0.789_446.25356	POS	0.789	446.254	C26 H31 N5 O2	1-{[(1S,4S,6S)-6-Isopropyl-3-methyl-4-{[5-(4-pyridinyl)-1,3,4-oxadiazol-2-yl]methyl}-2-cyclohexen-1-yl]methyl}-3-phenylurea	-0.00149621964135349	-3.36042025345694	20.7880517819804	3	mzCloud	NA	NA	NA	NA	NA	NA	NA	NA	NA	480916	415572	301118	472343	679994	2.23904e+06	466687	294001	611584	499010	4.03895e+06	435064	557368	339352	1.42371e+06	1.56174e+06	195987	193762	429276	2.54556e+06	909052
C1516	C1516_1-{[(2R,3S,4R,5S)-3,4-Dihydroxy-5-{2-[(2R)-2-(methoxymethyl)-1-pyrrolidinyl]-2-oxoethyl}tetrahydro-2-furanyl]methyl}-3-(3-fluorophenyl)urea	6.038_426.20554	POS	6.038	426.206	C20 H28 F N3 O6	1-{[(2R,3S,4R,5S)-3,4-Dihydroxy-5-{2-[(2R)-2-(methoxymethyl)-1-pyrrolidinyl]-2-oxoethyl}tetrahydro-2-furanyl]methyl}-3-(3-fluorophenyl)urea	0.0020492214486012	4.81947247615006	34.1598664188839	3	mzCloud	NA	NA	NA	NA	NA	NA	NA	NA	NA	56963	703580	2.39464e+06	326323	478083	295715	414413	2.82931e+06	758532	521250	1.57379e+06	787230	1.2294e+06	447264	134316	1.34393e+06	458529	754042	556113	2.49704e+06	928023
A1149	A1149_1-{[(2R,4S,5R)-5-{6-[4-(Dimethylamino)phenyl]-2-methyl-4-pyrimidinyl}-1-azabicyclo[2.2.2]oct-2-yl]methyl}-3-isopropylurea	2.087_481.29386	NEG	2.087	481.294	C25 H36 N6 O	1-{[(2R,4S,5R)-5-{6-[4-(Dimethylamino)phenyl]-2-methyl-4-pyrimidinyl}-1-azabicyclo[2.2.2]oct-2-yl]methyl}-3-isopropylurea	46.0060774673648	105447.165734831	42.7525191515232	3	mzCloud	NA	NA	NA	NA	NA	NA	NA	NA	NA	9.6087e+07	1.57224e+08	340877	7.07338e+07	8.55589e+06	225537	3.16995e+07	3.67049e+07	7.97773e+07	4.69127e+07	4.91292e+06	2.17942e+07	1.73506e+08	8.23902e+06	622118	383756	3.61443e+07	3.63597e+07	2.73173e+07	1.99102e+07	4.28725e+07
A1723	A1723_1-{[(2R,4S,5R)-5-{[(2R)-2-(Methoxymethyl)-1-pyrrolidinyl]methyl}-1-azabicyclo[2.2.2]oct-2-yl]methyl}-3-phenylurea	Reference9030	NEG	2.653	431.267	C22 H34 N4 O2	1-{[(2R,4S,5R)-5-{[(2R)-2-(Methoxymethyl)-1-pyrrolidinyl]methyl}-1-azabicyclo[2.2.2]oct-2-yl]methyl}-3-phenylurea	46.0056248209577	119102.809015141	22.5341814201765	3	mzCloud	NA	NA	NA	NA	NA	NA	NA	NA	NA	84356.6	92659.2	150439	92502.5	86602.6	1.64701e+06	142828	105723	153484	157703	2.86633e+06	91098.4	335421	254130	176577	1.61463e+07	140082	136910	95873.3	7.2783e+06	1.51172e+06
A777	A777_1-{[(2R,4S,5S)-5-{[Benzyl(methyl)amino]methyl}-1-azabicyclo[2.2.2]oct-2-yl]methyl}-3-(3-thienyl)urea	Reference9010	NEG	3.19	443.211	C22 H30 N4 O S	1-{[(2R,4S,5S)-5-{[Benzyl(methyl)amino]methyl}-1-azabicyclo[2.2.2]oct-2-yl]methyl}-3-(3-thienyl)urea	46.004426070625	115526.883411079	60.9089014098065	2	mzCloud	NA	NA	NA	NA	NA	NA	NA	NA	NA	689016	448158	4.21129e+06	6.66842e+06	3.13392e+06	839036	2.68379e+06	4.38981e+06	4.62971e+06	2.22749e+06	1.17349e+06	2.0631e+06	3.29112e+06	6.8871e+06	4.4475e+06	667739	4.23633e+06	5.78009e+06	3.32678e+06	1.61717e+06	3.17055e+06
A1050	A1050_1-{[(Ethylsulfonyl)methyl]sulfonyl}ethane	1.756_199.01072	NEG	1.756	199.011	C5 H12 O4 S2	1-{[(Ethylsulfonyl)methyl]sulfonyl}ethane	0.00029562644476754	1.47800141952972	50.4900166302051	3	mzCloud	NA	NA	NA	NA	NA	NA	NA	NA	NA	2.76592e+06	2.33117e+06	2.52651e+07	1.35425e+07	1.46089e+07	4.6945e+06	9.20507e+06	3.63357e+07	2.55882e+06	6.52582e+06	1.66685e+06	3.99066e+06	3.86001e+06	2.64432e+07	1.42525e+06	4.40267e+06	2.1639e+07	4.95274e+06	7.38824e+06	3.93127e+06	9.87667e+06
C240	C240_1-{[1-(3,5-dimethoxyphenyl)-1-methylethoxy]carbonyl}pyrrolidine-2-carboxylic acid	3.744_355.18605	POS	3.744	355.186	C17 H23 N O6	1-{[1-(3,5-dimethoxyphenyl)-1-methylethoxy]carbonyl}pyrrolidine-2-carboxylic acid	17.0262387682103	50500.1056941929	65.4584857207495	2	mzCloud	NA	NA	NA	NA	NA	NA	NA	NA	NA	1.52732e+07	1.26205e+07	7.53599e+06	1.15014e+07	1.32582e+07	1.37076e+06	1.56514e+07	1.47864e+07	9.49887e+06	1.62289e+07	4.34414e+06	2.23253e+07	1.16417e+07	7.37457e+06	8.72276e+06	5.21474e+06	2.43019e+07	7.20433e+06	1.20519e+07	327667	1.10617e+07
C1245	C1245_1-{[2-({[(4-chloroanilino)carbonyl]oxy}imino)cyclohexyl]methyl}-1H-imidazole	3.942_347.12720	POS	3.942	347.127	C17 H19 Cl N4 O2	1-{[2-({[(4-chloroanilino)carbonyl]oxy}imino)cyclohexyl]methyl}-1H-imidazole	0.00026716562507545	0.771888051998776	25.502160989853	3	mzCloud	NA	NA	NA	NA	NA	NA	NA	NA	NA	394461	557874	177270	540972	477474	167520	554351	391212	284186	604405	1.65694e+06	341307	583372	46458.4	669194	472172	841020	156781	428418	6.79013e+06	806776
A1069	A1069_1-{[5-Methyl-2-(trifluoromethyl)-3-furyl]carbonyl}-4-piperidinecarboxylic acid	1.98_304.07883	NEG	1.98	304.079	C13 H14 F3 N O4	1-{[5-Methyl-2-(trifluoromethyl)-3-furyl]carbonyl}-4-piperidinecarboxylic acid	-0.00138909712518398	-4.55311069675604	3.25765145187106	3	mzCloud	NA	NA	NA	NA	NA	NA	NA	NA	NA	6.64293e+06	1.42861e+07	1.42771e+06	6.52103e+06	5.36312e+06	1.21092e+06	2.07932e+06	2.85924e+06	2.10158e+07	3.15781e+06	1.53506e+07	3.10988e+06	9.84703e+06	4.40471e+06	5.54653e+07	3.49871e+07	1.23073e+06	4.21582e+06	5.81756e+06	3.70252e+07	1.18009e+07
C897	C897_10(E),12(Z)-Conjugated linoleic acid	Reference6903	NEG	10.3	279.233	C18 H32 O2	10(E),12(Z)-Conjugated linoleic acid	-0.0003790671094066	-1.35265057836336	99.9803804471756	2	mzCloud	NA	NA	NA	NA	NA	NA	NA	NA	NA	1.19301e+07	1.13907e+07	8.22446e+06	9.46679e+06	1.74028e+07	1.14008e+08	8.77496e+06	1.29541e+07	1.13893e+07	1.13087e+07	6.07909e+07	2.04956e+07	9.99457e+06	8.81502e+06	1.191e+07	5.95868e+07	8.99758e+06	1.324e+07	1.68975e+07	1.55151e+08	2.91364e+07
A3028	A3028_10,11-Dihydroxycarbamazepine	HMDB0060568	NEG	1.387	269.093	C15 H14 N2 O3	10,11-Dihydroxycarbamazepine	4.06487561122049e-05	0.150494963200008	NA	4	HMDB	NA	HMDB0060568	Organoheterocyclic compounds	Dibenzazepines	Benzazepines	Dibenzazepines	NA	NA	NA	124314	85746.5	93188.1	181038	114518	84451.7	104941	85803.5	645346	168291	1.21975e+07	106419	61150.3	67291.2	179707	6.21055e+06	68136.4	113272	199043	3.33583e+06	1.21133e+06
C3720	C3720_10-(Phosphonooxy)decyl methacrylate	HMDB0247525	POS	3.235	323.161	C14 H27 O6 P	10-(Phosphonooxy)decyl methacrylate	-0.00128302150665149	-3.98262761328567	NA	4	HMDB	NA	HMDB0247525	Organic acids and derivatives	Phosphate esters	Organic phosphoric acids and derivatives	Organic acids	NA	NA	NA	1.22997e+07	1.18546e+07	7.72334e+06	1.73005e+07	6.15057e+06	4.72294e+06	1.38351e+07	1.02266e+07	9.98696e+06	5.9472e+06	8.91635e+06	8.90079e+06	9.96579e+06	1.52938e+07	1.07801e+07	2.88514e+06	1.17491e+07	3.43085e+06	7.73581e+06	1.02989e+07	9.5002e+06
C3900	C3900_10-Acetoxy-10,11-dihydro-5h-dibenz[b,f]azepine-5-carboxamide	HMDB0249971	POS	4.6	297.124	C17 H16 N2 O3	10-Acetoxy-10,11-dihydro-5h-dibenz[b,f]azepine-5-carboxamide	0.00047142203129624	1.59201760251002	NA	4	HMDB	NA	HMDB0249971	Organoheterocyclic compounds	Dibenzazepines	Benzazepines	Dibenzazepines	NA	NA	NA	368210	1.03924e+06	758935	726620	670897	1.12487e+06	726209	528937	643965	796221	2.20715e+06	384553	253429	200492	535029	803236	758764	719219	1.68664e+06	50241.5	749143
C2731	C2731_10-Deacetyl-2-debenzoylbaccatin III;	C11899	POS	4.621	441.212	C22 H32 O9	10-Deacetyl-2-debenzoylbaccatin III;	0.00058490648439146	1.32871496889004	NA	4	KEGG	C11899	NA	NA	NA	NA	NA	Metabolism of terpenoids and polyketides	Diterpenoid biosynthesis	map01100 Metabolic pathways;	32784.1	32261.4	35784.7	39809.6	38278.9	45132.8	39326.7	35580.1	38305	39023.8	51502.6	35387.1	33518.9	4.635e+06	42741.5	33617.6	38896.8	32945.7	37938.7	44970.3	268140
A1884	A1884_10-Deoxymethymycin	0.76_452.30206	NEG	0.76	452.302	C25 H43 N O6	10-Deoxymethymycin	0.00030172828121521	0.66561276302732	NA	4	NA	NA	NA	NA	NA	NA	NA	NA	NA	NA	464396	603809	77765.1	1.70899e+06	343416	437847	787179	142750	192648	404625	193019	61184.8	467029	228946	126646	133762	308275	179588	113163	176775	357591
C891	C891_10-HDA	Reference6701	POS	4.87	169.122	C10 H18 O3	10-HDA	-18.0104287830787	-96764.922884161	66.8007406362958	2	mzCloud	NA	NA	NA	NA	NA	NA	NA	NA	NA	1.08138e+07	1.06336e+07	1.00115e+07	1.28786e+07	1.5203e+07	6.38946e+06	1.04471e+07	8.48162e+06	9.62423e+06	9.7163e+06	4.96585e+06	6.84895e+06	9.37395e+06	7.52737e+06	9.09715e+06	5.33977e+06	7.74304e+06	7.65164e+06	6.67362e+06	5.9264e+06	8.76734e+06
C4320	C4320_10-Hydroxy-2-oxabicyclo[6.2.2]dodeca-1(10),8,11-trien-3-one	HMDB0255348	POS	4.422	193.086	C11 H12 O3	10-Hydroxy-2-oxabicyclo[6.2.2]dodeca-1(10),8,11-trien-3-one	0.00052025003907374	2.70852619430393	NA	4	HMDB	NA	HMDB0255348	Benzenoids	1-hydroxy-4-unsubstituted benzenoids	Phenols	Phenols and derivatives	NA	NA	NA	1.0081e+06	797113	760016	1.52077e+06	1.47092e+06	364052	902474	765616	1.18716e+06	1.17484e+06	232016	1.04506e+06	765190	827111	1.21618e+06	325619	673957	717170	1.07761e+06	478943	865496
C3280	C3280_10-Hydroxy-octadec-12Z-enoate-9-beta-D-glucuronide	HMDB0060120	POS	4.648	491.286	C24 H42 O10	10-Hydroxy-octadec-12Z-enoate-9-beta-D-glucuronide	0.00063167640621486	1.28840508329175	NA	4	HMDB	NA	HMDB0060120	Lipids and lipid-like molecules	NA	Saccharolipids	Saccharolipids[SL]	NA	NA	NA	246365	188998	304319	249986	157839	77897.7	543803	528860	711706	230031	60050.4	1.35776e+06	186709	1.11567e+06	160060	152039	307775	428392	41707.1	108522	357924
A1527	A1527_10-Hydroxycarbazepine	HMDB0060676	POS	3.466	255.113	C15 H14 N2 O2	10-Hydroxycarbazepine	1.87058535345841e-05	0.073614508546062	25.6711940746029	3	mzCloud	C07493	HMDB0060676	Organoheterocyclic compounds	Dibenzazepines	Benzazepines	Dibenzazepines	Xenobiotics biodegradation and metabolism	Drug metabolism - cytochrome P450	map00982 Drug metabolism - cytochrome P450;	4.19857e+07	5.95124e+07	7.59972e+07	2.83457e+07	1.42509e+08	4.69321e+07	9.04943e+07	8.78623e+07	7.70935e+07	4.10651e+07	4.24534e+08	3.10572e+08	4.23481e+07	4.94149e+06	6.48179e+07	3.04373e+08	1.69558e+08	9.53666e+07	1.55176e+08	2.32749e+08	1.24812e+08
A4158	A4158_10-Methyl-9-(10-methyl-1H-acridin-9-yl)-1H-acridine	HMDB0257936	NEG	0.725	387.185	C28 H24 N2	10-Methyl-9-(10-methyl-1H-acridin-9-yl)-1H-acridine	-0.00162434073536133	-4.18435357046987	NA	4	HMDB	NA	HMDB0257936	Organoheterocyclic compounds	Benzoquinolines	Quinolines and derivatives	Quinone	NA	NA	NA	3.34345e+06	2.73759e+06	1.85724e+07	5.43674e+06	3.26335e+06	919975	1.85149e+06	3.70543e+06	3.50492e+06	3.58271e+06	941790	1.46087e+06	1.94218e+06	1.81553e+07	2.21537e+06	1.52227e+06	4.09378e+06	4.03628e+06	2.09905e+06	3.82573e+06	4.36053e+06
A577	A577_10-Nitrolinoleate	HMDB0005049	POS	3.783	308.222	C18 H31 N O4	10-Nitrolinoleate	-18.0106615820233	-55379.0283865247	74.2168202186738	2	mzCloud	C13800	HMDB0005049	Lipids and lipid-like molecules	Lineolic acids and derivatives	Fatty Acyls	Fatty acyls[FA]	NA	NA	NA	9.20255e+06	6.93265e+06	7.64953e+06	8.88305e+06	5.88448e+06	1.3883e+06	8.71666e+06	3.93956e+06	4.52991e+06	7.15459e+06	322022	6.069e+06	3.92127e+06	3.86914e+06	6.77527e+06	718276	9.42108e+06	2.10879e+06	5.62245e+06	217815	5.16632e+06
C2804	C2804_10-OPDA; 10-Oxo-11,15-phytodienoic acid; (11Z,15Z)-10-Oxo-11,15-phytodienoic acid;	C16325	POS	7.224	293.211	C18 H28 O3	10-OPDA; 10-Oxo-11,15-phytodienoic acid; (11Z,15Z)-10-Oxo-11,15-phytodienoic acid;	-0.00027532273435326	-0.942228308776941	NA	4	KEGG	C16325	NA	FA Fatty acyls	FA0200 Other Octadecanoids	FA02 Octadecanoids	Fatty acyls[FA]	Lipid metabolism	alpha-Linolenic acid metabolism	map00592 alpha-Linolenic acid metabolism;	8.64361e+06	7.98574e+06	6.26884e+06	9.30989e+06	7.52917e+06	1.74229e+06	2.95392e+06	4.80567e+06	3.77737e+06	1.22141e+06	2.79621e+06	1.9124e+07	4.92598e+06	8.24645e+06	7.61259e+06	4.37516e+06	9.05372e+06	3.1385e+06	2.16829e+06	5.86252e+06	6.07707e+06
C885	C885_10-Propoxydecanoic acid	Reference6604	NEG	8.59	229.181	C13 H26 O3	10-Propoxydecanoic acid	-0.00037595781248001	-1.63326278815462	60.2736404244495	2	mzCloud	NA	NA	NA	NA	NA	NA	NA	NA	NA	768991	1.04764e+06	426740	467619	347337	203306	670871	473108	918545	683013	284436	344804	312422	129602	1.42654e+06	174031	612119	289715	449391	160633	509543
A3065	A3065_10-alpha-methoxy-9,10-dihydrolysergol	HMDB0060995	POS	3.428	287.176	C17 H22 N2 O2	10-alpha-methoxy-9,10-dihydrolysergol	0.00034624242192649	1.20992657189231	NA	4	HMDB	NA	HMDB0060995	Phenylpropanoids and polyketides	Cinnamylphenols	Linear 1,3-diarylpropanoids	Phenols and derivatives	NA	NA	NA	995077	677352	1.46298e+06	722744	675584	1.85432e+06	365179	3.03351e+06	727884	117988	3.7074e+06	1.45295e+06	491299	2.71306e+06	1.28151e+06	8.44472e+06	830945	580213	2.34231e+06	2.53403e+06	1.75055e+06
C9	C9_10-hydroxydecanoate	C02774	POS	6.792	171.138	C10 H20 O3	10-hydroxydecanoate	-18.0102087032174	-95727.0627216993	71.6312619435441	1	BMDB	C02774	NA	FA Fatty acyls	FA0105 Hydroxy fatty acids	FA01 Fatty Acids and Conjugates	Fatty acyls[FA]	NA	NA	NA	2.72335e+06	2.68763e+06	4.82046e+06	4.91379e+06	9.69896e+06	4.90393e+06	5.04161e+06	1.02566e+07	2.81571e+06	5.76244e+06	3.14214e+06	2.67366e+06	3.11126e+06	2.1368e+06	2.08693e+06	2.10152e+06	3.50843e+06	2.63452e+06	1.1058e+07	3.6038e+06	4.48408e+06
C2464	C2464_10-methoxy-octadecanoic acid	9.525_297.27891	POS	9.525	297.279	C19 H38 O3	10-methoxy-octadecanoic acid	0.00013481292751294	0.428955163795369	NA	4	NA	NA	NA	NA	NA	NA	NA	NA	NA	NA	4.98061e+07	3.91358e+07	1.74623e+08	2.43647e+07	3.37566e+07	1.1938e+08	2.20636e+08	2.84974e+08	5.86443e+07	5.30411e+07	4.91293e+07	6.21743e+07	3.7864e+08	2.79326e+08	1.11508e+07	1.93372e+08	2.05412e+08	4.36068e+08	1.57185e+07	7.39007e+07	1.38163e+08
A1829	A1829_10-oxo-nonadecanoic acid	0.73_313.27356	POS	0.73	313.274	C19 H36 O3	10-oxo-nonadecanoic acid	-0.0001656515565287	-0.530481450199872	NA	4	NA	NA	NA	NA	NA	NA	NA	NA	NA	NA	1.88227e+07	2.27217e+07	8.1307e+06	1.96436e+07	7.89833e+06	1.10182e+07	1.21754e+07	1.56747e+07	2.7852e+07	1.70164e+07	1.41067e+07	9.00227e+06	6.32189e+07	4.1801e+06	7.89074e+07	2.97065e+07	5.31064e+06	9.7e+06	1.12e+07	1.72374e+07	2.01762e+07
C3278	C3278_10Z-Heptadecenoic acid	HMDB0060038	NEG	10.03	267.232	C17 H32 O2	10Z-Heptadecenoic acid	-0.0004706198437816	-1.7544715179408	NA	4	HMDB	NA	HMDB0060038	Lipids and lipid-like molecules	Fatty acids and conjugates	Fatty Acyls	Fatty acyls[FA]	NA	NA	NA	587544	410964	200786	183698	779084	2.70883e+06	351170	537667	439977	387086	1.43169e+06	746867	322034	410801	556993	1.82889e+06	407098	550939	584482	2.38129e+06	790394
A143	A143_11(E)-Eicosenoic Acid	1.131_309.28010	NEG	1.131	309.28	C20 H38 O2	11(E)-Eicosenoic Acid	0.0002001800426683	0.645144418950723	69.0403175337185	2	mzCloud	NA	NA	NA	NA	NA	NA	NA	NA	NA	1.77361e+06	1.25955e+06	383406	1.31799e+06	1.08762e+06	8.47409e+06	2.03516e+06	4.72814e+06	1.85466e+06	2.63719e+06	1.02277e+07	3.78703e+06	4.86944e+06	1.14164e+06	3.3026e+06	1.99704e+07	3.62675e+06	1.24875e+06	1.28389e+06	2.70379e+07	5.10238e+06
C790	C790_11(Z),14(Z),17(Z)-Eicosatrienoic acid	HMDB0060039	POS	7.912	307.263	C20 H34 O2	11(Z),14(Z),17(Z)-Eicosatrienoic acid	-5.55701734015202e-05	-0.181450143460433	75.9492277811143	2	mzCloud	C16522	HMDB0060039	Lipids and lipid-like molecules	Fatty acids and conjugates	Fatty Acyls	Fatty acyls[FA]	Lipid metabolism	Biosynthesis of unsaturated fatty acids	map01040 Biosynthesis of unsaturated fatty acids;	2.02741e+06	465819	1.59804e+06	1.28828e+06	558707	77422.7	1.58661e+06	1.37937e+06	594875	303154	91182.2	346848	953204	426881	1.12566e+06	656951	1.66433e+06	719002	520775	121135	825283
A578	A578_11(Z),14(Z)-Eicosadienoic acid	HMDB0005060	NEG	0.818	307.264	C20 H36 O2	11(Z),14(Z)-Eicosadienoic acid	-8.25434213425069e-05	-0.267762064396714	90.256911493697	2	mzCloud	C16525	HMDB0005060	Lipids and lipid-like molecules	Fatty acids and conjugates	Fatty Acyls	Fatty acyls[FA]	Lipid metabolism	Biosynthesis of unsaturated fatty acids	map01040 Biosynthesis of unsaturated fatty acids;	2.20077e+08	2.03163e+08	2.19082e+07	1.90236e+08	1.35114e+08	5.75476e+08	2.13048e+08	3.67879e+08	7.28069e+08	1.41325e+08	1.57674e+09	2.98182e+08	3.01874e+08	6.27927e+07	2.7685e+08	1.13651e+09	2.31732e+08	3.33891e+08	1.59157e+08	1.50501e+09	4.33952e+08
A86	A86_11(Z)-Eicosenoic acid	0.811_309.27982	NEG	0.811	309.28	C20 H38 O2	11(Z)-Eicosenoic acid	-6.7041164982129e-05	-0.216061665546956	88.7466480998832	2	mzCloud	NA	NA	NA	NA	NA	NA	NA	NA	NA	2.18971e+08	2.03163e+08	4.10425e+07	1.89682e+08	1.88422e+08	4.36745e+08	2.12143e+08	3.67817e+08	4.74169e+08	3.55037e+08	1.03854e+09	2.98182e+08	7.02404e+08	1.07916e+08	3.59415e+08	1.11671e+09	2.29932e+08	3.33891e+08	1.82356e+08	9.97111e+08	4.02682e+08
C4932	C4932_11,12-dihydroxy-13-methoxy-4,5,8-trimethyl-3-(2-methylpropyl)-1H,2H,3H,4H,6aH,9H,10H,11H,12H,13H,14H,15H,15bH-cycloundeca[e]isoindole-1,15-dione	PB01748	NEG	9.065	432.275	C25 H39 N O5	11,12-dihydroxy-13-methoxy-4,5,8-trimethyl-3-(2-methylpropyl)-1H,2H,3H,4H,6aH,9H,10H,11H,12H,13H,14H,15H,15bH-cycloundeca[e]isoindole-1,15-dione	-0.00058316109374345	-1.34591325240385	8.47195789259184	4	Public	NA	NA	NA	NA	NA	NA	NA	NA	NA	33678.8	16240.8	1.66054e+06	119838	4.03251e+06	25011.9	68449	752872	18015	37078.1	16687.2	66502	242683	3669.65	472156	22803.6	531844	5767.38	310674	11643.5	422433
C1464	C1464_11,13-Dihydroxy-4-methyl-4,5,6,7,8,9-hexahydro-2H-3-benzoxacyclododecine-2,10(1H)-dione	5.375_293.13831	POS	5.375	293.138	C16 H20 O5	11,13-Dihydroxy-4-methyl-4,5,6,7,8,9-hexahydro-2H-3-benzoxacyclododecine-2,10(1H)-dione	-4.23352725533732e-05	-0.144918758664272	58.3886081620989	3	mzCloud	NA	NA	NA	NA	NA	NA	NA	NA	NA	875141	607379	1.49495e+06	1.29205e+06	2.35585e+06	736677	1.05403e+06	1.27892e+06	1.77308e+06	542980	48742.4	641803	1.70095e+06	2.616e+06	948795	533211	1.10479e+06	918165	697447	45762.5	1.06334e+06
C2245	C2245_11,22-dimethyl (6E,17E)-3,14-dioxo-8,19-bis({[(2S,3R,4S,5S,6R)-3,4,5-trihydroxy-6-(hydroxymethyl)oxan-2-yl]oxy})-4,9,15,20-tetraoxatricyclo[16.4.0.07,	3.883_288.14436	POS	3.883	288.144	C13 H18 O6	11,22-dimethyl (6E,17E)-3,14-dioxo-8,19-bis({[(2S,3R,4S,5S,6R)-3,4,5-trihydroxy-6-(hydroxymethyl)oxan-2-yl]oxy})-4,9,15,20-tetraoxatricyclo[16.4.0.07,	17.0267028118005	63036.1019465145	11.2056135404467	4	Public	NA	NA	NA	NA	NA	NA	NA	NA	NA	3.91502e+06	3.98633e+06	2.55329e+06	3.92745e+06	3.77259e+06	1.63006e+06	3.33416e+06	2.35062e+06	3.24818e+06	3.17885e+06	1.28394e+06	2.38162e+06	3.18261e+06	6.97718e+06	3.76891e+06	1.38556e+06	3.89913e+06	2.39485e+06	3.05017e+06	868356	3.05444e+06
A337	A337_11-Dehydro thromboxane B2	6.57_367.21320	NEG	6.57	367.213	C20 H32 O6	11-Dehydro thromboxane B2	0.00058387078126997	1.58565791639698	85.3221769905087	2	mzCloud	NA	NA	NA	NA	NA	NA	NA	NA	NA	68255.1	19567.5	46563.9	26991.3	14083.5	30303	18200.3	48965.3	23281.2	16726.9	60956.1	20263	33351.2	5.87968e+06	34574.6	47977.1	484377	68970.3	105316	60859.7	355463
A74	A74_11-Deoxy prostaglandin F1	0.741_323.25801	POS	0.741	323.258	C20 H36 O4	11-Deoxy prostaglandin F1	-18.0106298875282	-52931.7519775174	80.916393642996	2	mzCloud	NA	NA	NA	NA	NA	NA	NA	NA	NA	6.26272e+06	4.46151e+06	85486.2	4.51264e+06	2.74683e+06	292390	3.35055e+06	2.44541e+06	4.39004e+06	80448.8	457026	121191	2.92477e+06	71550.8	2.44614e+07	435380	4.19574e+06	2.73538e+06	1.81609e+06	579154	3.32129e+06
A2582	A2582_11-Deoxylandomycinone;	C18682	NEG	11.785	321.076	C19 H14 O5	11-Deoxylandomycinone;	-0.0005528446874905	-1.71646053714232	NA	4	KEGG	C18682	NA	PK Polyketides	Null	PK08 Angucyclines	Polyketides[PK]	Metabolism of terpenoids and polyketides	Biosynthesis of type II polyketide products	NA	196312	119018	761137	48530.7	550396	401349	457281	513419	22849.1	236716	37551.1	1.48769e+06	40601.9	918172	23486.5	50854.5	368470	898654	286381	34680.5	372678
C2906	C2906_11-Deoxytetrodotoxin;	C20026	POS	0.715	304.114	C11 H17 N3 O7	11-Deoxytetrodotoxin;	-2.21917696308083e-05	-0.0732143938512746	NA	4	KEGG	C20026	NA	Marine biotoxins	Tetrodotoxins	Others	Marine biotoxins	NA	NA	NA	1.806e+06	2.70426e+06	1.78693e+06	2.87429e+06	2.37895e+06	680450	2.24977e+06	1.70647e+06	2.84918e+06	2.72084e+06	1.04082e+06	4.68554e+06	2.11228e+06	521719	3.17977e+06	671970	2.57908e+06	884369	742434	1.39446e+06	1.97848e+06
A2042	A2042_11-Hydroxy-9-tridecenoic acid	0.975_229.18001	POS	0.975	229.18	C13 H24 O3	11-Hydroxy-9-tridecenoic acid	0.00018900099445318	0.828324875154358	NA	4	NA	NA	NA	NA	NA	NA	NA	NA	NA	NA	760752	1.70979e+06	341394	895646	615952	250826	291628	178872	1.05762e+06	1.86432e+06	484172	280639	2.5975e+06	262853	3.82161e+06	1.45505e+06	478504	853914	1.1301e+06	837385	1.00843e+06
C548	C548_11-Ketotestosterone	C14256	POS	6.995	303.195	C19 H26 O3	11-Ketotestosterone	-0.00022495341482908	-0.744414966778375	62.0600932916426	2	mzCloud	C14256	NA	ST Sterol lipids	ST0202 C19 steroids (androgens) and derivatives	ST02 Steroids	Sterol lipids[ST]	NA	NA	NA	2.57402e+06	2.51983e+06	2.31282e+06	3.23404e+06	2.84072e+06	1.01387e+06	2.66126e+06	2.02442e+06	2.1115e+06	2.46895e+06	333456	1.96811e+06	2.44552e+06	2.10611e+06	2.72007e+06	768042	3.25314e+06	1.87626e+06	1.82072e+06	615108	2.0834e+06
C2305	C2305_11-amino-undecanoic acid	6.515_202.18045	POS	6.515	202.18	C11 H23 N O2	11-amino-undecanoic acid	0.00029612374984822	1.47198644013112	NA	4	NA	NA	NA	NA	NA	NA	NA	NA	NA	NA	419197	873963	569639	369353	888685	4.02641e+06	558216	649047	1.31899e+06	1.26441e+06	1.6429e+06	950862	833454	357198	272830	5.45115e+06	390022	803950	784007	2.44992e+06	1.24371e+06
C1546	C1546_11-dehydro Thromboxane B2	6.561_369.22549	POS	6.561	369.225	C20 H32 O6	11-dehydro Thromboxane B2	-184.11052987681	-500001.59034541	39.940151895788	3	mzCloud	NA	NA	NA	NA	NA	NA	NA	NA	NA	6.84952e+06	3.47346e+06	2.92847e+06	1.05682e+07	3.46773e+06	2.78057e+06	1.57912e+06	5.96763e+06	4.64343e+06	5.55911e+06	688267	2.63226e+06	4.67511e+06	1.03769e+07	7.68826e+06	821287	1.64082e+06	1.69119e+06	1.25616e+06	667595	3.99775e+06
C2299	C2299_11-dimethylarsinoyl-undecanoic acid	6.374_307.12640	POS	6.374	307.126	C13 H27 As O3	11-dimethylarsinoyl-undecanoic acid	0.00151116859382228	4.93656201011611	NA	4	NA	NA	NA	NA	NA	NA	NA	NA	NA	NA	51083.2	42580.2	51800.9	51360.7	50133	2.415e+06	40994	45615.3	41356.4	53550.9	568984	39694.5	48431.4	41866	53541	48249.9	42816	37930.5	51472	70776.9	192362
A2060	A2060_11-methoxy-octadecanoic acid	1.014_313.27499	NEG	1.014	313.275	C19 H38 O3	11-methoxy-octadecanoic acid	0.00017570936853417	0.559081701958606	NA	4	NA	NA	NA	NA	NA	NA	NA	NA	NA	NA	613770	788693	459809	300874	903657	7.06252e+06	1.52005e+06	3.37618e+06	6.03786e+06	1.35729e+06	7.02017e+06	1.48065e+06	7.07384e+06	1.92744e+06	4.57015e+06	2.31988e+07	1.72488e+06	5.84937e+06	480660	1.10631e+07	4.34049e+06
[truncated: 6,800 more rows]

## Sheet: Enrichmentresults
KEGG_pathway	Total_Size	Hits	Sig_Hits	Mummichog_Pvals	GSEA_Pvals	Combined_Pvals	cpd.hits	Mode
Phenylalanine metabolism	8	8	7	4e-05	0.999	0.00042	C00601;C00079;C00166;C07086;C05852;C02763;C00082	Positive
Tryptophan metabolism	39	33	14	0.00074	0.999	0.00604	C01598;C05635;C02700;C00322;C00632;C00328;C05653;C05648;C05634;C05642;C05643;C05647;C05660;C05639;C00108;C05637;C00954	Positive
[truncated: 73 more rows]

## Sheet: Enrichedcompounds
Compound	Pathway	Mode	Mass	MatchedForm	MassDiff	Stat	Pval
[truncated: 329 more rows]

[truncated: 3 more sheets: SPLSDAfeatures, DIABLOfeatures, DIABLOcorrelations]
